# Supplementary material for: Analogue closed-loop optogenetic modulation of hippocampal pyramidal cells dissociates gamma frequency and amplitude
Source: eLife. 2018 Oct 23;7:e38346. doi: 10.7554/eLife.38346 (PMC6219844; doi:10.7554/eLife.38346)
Supplement: Figure 1—source data 1. [file elife-38346-fig1-data1.xlsx]

## Sheet: Sheet1
Control			With clamp 6s - 8s
Time (ms)	LFP (mV)		Time (ms)	LFP (mV)
0	-0.00453914		0	0.000648287
0.5	-0.00453914		0.5	-0.00194823
1	-0.00518827		1	-0.00389562
1.5	-0.00453914		1.5	-0.00649214
2	-0.00389001		2	-0.00649214
2.5	-0.00518827		2.5	-0.00324649
3	-0.00713566		3	-8.43629e-07
3.5	-0.00648653		3.5	0.00389394
4	-0.00518827		4	0.00129742
4.5	0.000653902		4.5	0.00129742
5	0.00909259		5	-8.43629e-07
5.5	0.0129874		5.5	-0.00194823
6	0.016233		6	-0.00389562
6.5	0.0207769		6.5	-0.00584301
7	0.0253208		7	-0.00649214
7.5	0.0240226		7.5	-0.00324649
8	0.0214261		8	-0.0012991
8.5	0.0168822		8.5	-0.000649974
9	0.0142856		9	0.00129742
9.5	0.00909259		9.5	0.00259568
10	0.00389955		10	-0.000649974
10.5	0.00454868		10.5	-0.00584301
11	0.00389955		11	-0.00714128
11.5	0.00844346		11.5	-0.00389562
12	0.00909259		12	0.0051922
12.5	0.00649607		12.5	0.01428
13	0.00195216		13	0.0201222
13.5	-0.000644358		13.5	0.0207713
14	-0.00194262		14	0.0168765
14.5	-0.00259175		14.5	0.00713959
15	-0.00194262		15	-8.43629e-07
15.5	0.00260129		15.5	0.00324481
16	0.00454868		16	0.00908698
16.5	0.00195216		16.5	0.00973611
17	-0.00453914		17	0.00649046
17.5	-0.0116796		17.5	0.00129742
18	-0.00648653		18	-0.0012991
18.5	-0.00129349		18.5	-0.000649974
19	0.00260129		19	0.00259568
19.5	0.000653902		19.5	0.00843785
20	-0.00389001		20	0.0110344
20.5	-0.00648653		20.5	0.00843785
21	-0.00973218		21	0.00584133
21.5	-0.0129778		21.5	0.00713959
22	-0.0149252		22	0.0103852
22.5	-0.0149252		22.5	0.0116835
23	-0.0110304		23	0.00973611
23.5	-0.00389001		23.5	0.00713959
24	0.000653902		24	0.00843785
24.5	0.000653902		24.5	0.00713959
25	0.00260129		25	0.00389394
25.5	0.00389955		25.5	0.00649046
26	0.00454868		26	0.00973611
26.5	0.0129874		26.5	0.00908698
27	0.0149348		27	0.00778872
27.5	0.0142856		27.5	0.00259568
28	0.0129874		28	-0.000649974
28.5	0.0123382		28.5	-0.00194823
29	0.0116891		29	-0.00324649
29.5	0.00974172		29.5	-0.00389562
30	0.00649607		30	-0.00649214
30.5	0.00195216		30.5	-0.0012991
31	0.00130303		31	0.00389394
31.5	0.00325042		31.5	0.00259568
32	0.00195216		32	0.00259568
32.5	-0.00324088		32.5	-0.0012991
33	-0.00453914		33	-0.0077904
33.5	-0.00259175		33.5	-0.0168782
34	0.000653902		34	-0.0240187
34.5	0.00195216		34.5	-0.0227204
35	0.00454868		35	-0.0129834
35.5	0.00584694		35.5	-0.00649214
36	0.00519781		36	-0.00519388
36.5	0.00389955		36.5	-0.00714128
37	0.00260129		37	-0.00843953
37.5	0.00260129		37.5	-0.00584301
38	4.77206e-06		38	-0.000649974
38.5	-0.00389001		38.5	0.0051922
39	-0.00518827		39	0.00389394
39.5	-0.0058374		39.5	0.00194655
40	-0.0103813		40	0.00454307
40.5	-0.00973218		40.5	0.00778872
41	-0.0123287		41	0.00908698
41.5	-0.0103813		41.5	0.00843785
42	-0.0110304		42	0.00649046
42.5	-0.0116796		42.5	0.0051922
43	-0.00973218		43	0.00908698
43.5	-0.00778479		43.5	0.0123326
44	-0.00648653		44	0.00843785
44.5	-0.00518827		44.5	0.00324481
45	-0.00389001		45	0.00259568
45.5	-0.00324088		45.5	0.00129742
46	0.00130303		46	-0.0012991
46.5	0.00260129		46.5	-8.43629e-07
47	0.00584694		47	0.00129742
47.5	0.01104		47.5	-0.000649974
48	0.0136365		48	-0.00584301
48.5	0.0136365		48.5	-0.00843953
49	0.0071452		49	-0.0077904
49.5	4.77206e-06		49.5	-0.00908866
50	-0.00324088		50	-0.0103869
50.5	-0.00453914		50.5	-0.0123343
51	-0.00194262		51	-0.0103869
51.5	4.77206e-06		51.5	-0.0012991
52	0.00325042		52	-0.000649974
52.5	0.00260129		52.5	-0.00194823
53	0.00260129		53	-0.00584301
53.5	0.000653902		53.5	-0.0110361
54	0.00130303		54	-0.0142817
54.5	0.00519781		54.5	-0.0116852
55	0.000653902		55	-0.00714128
55.5	4.77206e-06		55.5	-0.00519388
56	0.00195216		56	-0.00519388
56.5	0.00325042		56.5	-0.0077904
57	-0.000644358		57	-0.0110361
57.5	-0.00518827		57.5	-0.0116852
58	-0.00778479		58	-0.00714128
58.5	-0.00973218		58.5	-0.00389562
59	-0.0103813		59	0.000648287
59.5	-0.00778479		59.5	0.00259568
60	-0.00389001		60	0.0051922
60.5	-0.00778479		60.5	0.00778872
61	-0.0110304		61	0.00843785
61.5	-0.0110304		61.5	0.00389394
62	-0.0123287		62	-0.00324649
62.5	-0.0116796		62.5	-0.00454475
63	-0.00843392		63	-8.43629e-07
63.5	-0.00778479		63.5	0.00194655
64	-0.00778479		64	0.00259568
64.5	-0.0058374		64.5	-0.0012991
65	-0.00324088		65	-0.00259736
65.5	-0.000644358		65.5	-8.43629e-07
66	0.00195216		66	-0.00194823
66.5	0.0071452		66.5	-0.00194823
67	0.0129874		67	0.000648287
67.5	0.01104		67.5	0.00259568
68	0.0116891		68	0.000648287
68.5	0.00844346		68.5	-0.00194823
69	0.00584694		69	-0.00519388
69.5	0.000653902		69.5	-0.00584301
70	-0.00453914		70	-0.00714128
70.5	-0.00778479		70.5	-0.00519388
71	-0.00908305		71	-0.00649214
71.5	-0.0058374		71.5	-0.0077904
72	0.00195216		72	-0.0077904
72.5	0.0071452		72.5	-0.0123343
73	0.0071452		73	-0.0116852
73.5	0.00584694		73.5	-0.00908866
74	0.00260129		74	-0.00649214
74.5	0.00389955		74.5	-0.000649974
75	0.00454868		75	-0.000649974
75.5	0.00195216		75.5	-0.00259736
76	0.00325042		76	-0.00324649
76.5	0.00260129		76.5	-0.00454475
77	-0.00324088		77	-0.00584301
77.5	-0.00778479		77.5	-0.00194823
78	-0.00908305		78	0.00713959
78.5	-0.00648653		78.5	0.00584133
79	-0.00194262		79	0.00778872
79.5	0.00195216		79.5	0.00649046
80	0.00649607		80	0.00649046
80.5	0.0071452		80.5	0.0051922
81	0.00649607		81	0.00713959
81.5	0.00649607		81.5	0.00713959
82	0.00649607		82	0.00649046
82.5	0.00454868		82.5	0.00778872
83	0.00454868		83	0.00843785
83.5	0.00260129		83.5	0.0103852
84	0.00195216		84	0.00973611
84.5	0.00454868		84.5	0.00259568
85	0.00584694		85	-8.43629e-07
85.5	0.00454868		85.5	-8.43629e-07
86	0.0071452		86	-0.0012991
86.5	0.00909259		86.5	0.000648287
87	0.0116891		87	0.00259568
87.5	0.0155839		87.5	0.00129742
88	0.0155839		88	-0.00194823
88.5	0.00974172		88.5	-0.00194823
89	0.00519781		89	-0.0012991
89.5	0.00779433		89.5	0.00194655
90	0.0103909		90	0.00194655
90.5	0.016233		90.5	-0.00389562
91	0.0214261		91	-0.0110361
91.5	0.0175313		91.5	-0.0116852
92	0.0103909		92	-0.00454475
92.5	0.00519781		92.5	-8.43629e-07
93	0.000653902		93	-0.00324649
93.5	4.77206e-06		93.5	-0.00649214
94	4.77206e-06		94	-0.00714128
94.5	-0.00259175		94.5	-0.00389562
95	-0.00518827		95	-8.43629e-07
95.5	-0.00389001		95.5	-0.00324649
96	-0.00453914		96	-0.00908866
96.5	-0.00389001		96.5	-0.0129834
97	0.000653902		97	-0.0103869
97.5	0.00389955		97.5	-0.00389562
98	0.00260129		98	-8.43629e-07
98.5	-0.00259175		98.5	0.00584133
99	-0.00648653		99	0.00194655
99.5	-0.00843392		99.5	-0.00324649
100	-0.00713566		100	-0.00584301
100.5	-0.00518827		100.5	-0.00389562
101	-0.00259175		101	-8.43629e-07
101.5	-0.000644358		101.5	0.00259568
102	0.00130303		102	0.00324481
102.5	0.00325042		102.5	0.00649046
103	-0.00389001		103	0.00908698
103.5	-0.0058374		103.5	0.00908698
104	-0.00453914		104	0.00713959
104.5	-0.00324088		104.5	0.00649046
105	-0.0058374		105	0.0129818
105.5	-0.00453914		105.5	0.01428
106	0.00130303		106	0.01428
106.5	0.0071452		106.5	0.0123326
107	0.00779433		107	0.00778872
107.5	0.00909259		107.5	0.00389394
108	0.00844346		108	0.00194655
108.5	0.00779433		108.5	-0.000649974
109	0.0103909		109	-0.00324649
109.5	0.01104		109.5	-0.00324649
110	0.00909259		110	-0.0012991
110.5	0.00909259		110.5	-0.0012991
111	0.0071452		111	-0.0012991
111.5	0.00519781		111.5	-0.0012991
112	0.00454868		112	-0.00519388
112.5	0.00260129		112.5	-0.00714128
113	0.00195216		113	-0.0162291
113.5	0.00195216		113.5	-0.0142817
114	0.000653902		114	-0.0123343
114.5	-0.000644358		114.5	-0.00973779
115	0.000653902		115	-0.00714128
115.5	-0.00129349		115.5	-0.00389562
116	-0.00648653		116	-0.00194823
116.5	-0.013627		116.5	-0.00454475
117	-0.01882		117	-0.00454475
117.5	-0.0123287		117.5	-0.00649214
118	-0.00648653		118	-0.00389562
118.5	-0.00324088		118.5	0.00194655
119	-0.00648653		119	0.00584133
119.5	-0.00389001		119.5	0.00778872
120	0.00584694		120	0.00649046
120.5	0.0129874		120.5	0.000648287
121	0.0194787		121	0.000648287
121.5	0.0220752		121.5	0.00389394
122	0.0207769		122	0.00973611
122.5	0.016233		122.5	0.0123326
123	0.0155839		123	0.0136309
123.5	0.00974172		123.5	0.0123326
124	0.00649607		124	0.00843785
124.5	0.00844346		124.5	0.00454307
125	0.00584694		125	0.00324481
125.5	0.00519781		125.5	0.00324481
126	0.01104		126	0.0051922
126.5	0.0155839		126.5	0.0123326
127	0.0155839		127	0.0149291
127.5	0.0123382		127.5	0.0162274
128	0.00649607		128	0.0155783
128.5	0.00519781		128.5	0.0136309
129	0.00584694		129	0.00843785
129.5	0.00519781		129.5	0.0051922
130	0.00584694		130	0.00129742
130.5	0.00260129		130.5	-0.00259736
131	0.00389955		131	-0.00714128
131.5	0.00260129		131.5	-0.00908866
132	0.00325042		132	-0.0077904
132.5	0.00584694		132.5	-0.00584301
133	0.0116891		133	-0.0116852
133.5	0.0136365		133.5	-0.0110361
134	0.0129874		134	-0.00843953
134.5	0.00974172		134.5	-0.00519388
135	0.0071452		135	-0.00324649
135.5	0.0071452		135.5	-0.00389562
136	0.00909259		136	-0.00519388
136.5	0.00974172		136.5	-0.0012991
137	0.0123382		137	0.00778872
137.5	0.0129874		137.5	0.0136309
138	0.01104		138	0.0129818
138.5	0.00130303		138.5	0.0123326
139	-0.00713566		139	0.00908698
139.5	-0.00973218		139.5	0.00713959
140	-0.00778479		140	0.00324481
140.5	-0.00389001		140.5	-0.00194823
141	-0.00259175		141	-0.00324649
141.5	-0.00259175		141.5	-0.00194823
142	-0.00194262		142	0.00259568
142.5	-0.00259175		142.5	0.0051922
143	-0.0058374		143	0.00454307
143.5	-0.00713566		143.5	0.00454307
144	-0.00648653		144	0.00713959
144.5	-0.00389001		144.5	0.00649046
145	-0.00259175		145	0.00649046
145.5	0.00584694		145.5	0.00454307
146	0.00844346		146	0.00584133
146.5	0.0071452		146.5	0.00389394
147	0.00584694		147	0.00389394
147.5	0.00649607		147.5	0.00649046
148	0.0071452		148	0.00454307
148.5	0.00519781		148.5	0.000648287
149	0.00649607		149	-0.00194823
149.5	0.0103909		149.5	-0.00194823
150	0.0136365		150	-0.00454475
150.5	0.0116891		150.5	-0.00519388
151	0.0103909		151	-0.00259736
151.5	0.00519781		151.5	0.00129742
152	0.00584694		152	0.0051922
152.5	0.00519781		152.5	0.0110344
153	0.00325042		153	0.0129818
153.5	0.00195216		153.5	0.00649046
154	0.00325042		154	-0.00454475
154.5	0.00454868		154.5	-0.00973779
155	0.00519781		155	-0.0077904
155.5	0.00389955		155.5	-0.00454475
156	0.00130303		156	-8.43629e-07
156.5	-0.000644358		156.5	0.00778872
157	-0.00129349		157	0.0103852
157.5	-0.00713566		157.5	0.00843785
158	-0.0129778		158	0.00454307
158.5	-0.0129778		158.5	0.00129742
159	-0.00843392		159	-0.000649974
159.5	4.77206e-06		159.5	-0.00259736
160	0.00325042		160	-0.0012991
160.5	0.00325042		160.5	0.00129742
161	0.00454868		161	0.000648287
161.5	0.00519781		161.5	-0.00259736
162	0.000653902		162	-0.00519388
162.5	-0.00389001		162.5	-0.00389562
163	-0.00324088		163	-8.43629e-07
163.5	0.00195216		163.5	0.000648287
164	0.00649607		164	-8.43629e-07
164.5	0.00649607		164.5	-8.43629e-07
165	0.00844346		165	0.00129742
165.5	0.00779433		165.5	0.00129742
166	0.00649607		166	0.00194655
166.5	0.00260129		166.5	-0.000649974
167	-0.00324088		167	-0.00324649
167.5	-0.0058374		167.5	-0.00649214
168	-0.00259175		168	-0.00519388
168.5	0.000653902		168.5	-0.00259736
169	4.77206e-06		169	0.000648287
169.5	-0.00259175		169.5	0.00454307
170	-0.00453914		170	0.00649046
170.5	-0.00648653		170.5	0.00129742
171	-0.00778479		171	-0.00389562
171.5	-0.00194262		171.5	-0.00519388
172	0.00519781		172	-0.0012991
172.5	0.0071452		172.5	-0.00194823
173	0.00260129		173	-0.00519388
173.5	-0.00194262		173.5	-0.00908866
174	-0.00259175		174	-0.00714128
174.5	0.000653902		174.5	-0.0077904
175	0.00584694		175	-0.00714128
175.5	0.00909259		175.5	-0.00259736
176	0.00909259		176	0.00389394
176.5	0.0071452		176.5	0.00843785
177	0.00195216		177	0.00973611
177.5	0.00260129		177.5	0.00843785
178	0.00779433		178	0.00778872
178.5	0.01104		178.5	0.00778872
179	0.00974172		179	0.00713959
179.5	0.00389955		179.5	0.00778872
180	0.00130303		180	0.00908698
180.5	-0.00129349		180.5	0.00194655
181	-0.00324088		181	-0.00194823
181.5	-0.00129349		181.5	0.000648287
182	0.00260129		182	0.00584133
182.5	0.00260129		182.5	0.00908698
183	0.000653902		183	0.00973611
183.5	-0.00389001		183.5	0.00713959
184	-0.0103813		184	0.00454307
184.5	-0.013627		184.5	0.00454307
185	-0.0142761		185	0.00454307
185.5	-0.0110304		185.5	0.00649046
186	-0.00389001		186	0.00649046
186.5	0.000653902		186.5	0.00454307
187	0.00454868		187	-0.00194823
187.5	0.000653902		187.5	-0.00519388
188	4.77206e-06		188	-0.00649214
188.5	0.00130303		188.5	-0.00649214
189	0.00325042		189	-0.00389562
189.5	0.000653902		189.5	-0.00519388
190	-0.00194262		190	-0.00843953
190.5	-0.00259175		190.5	-0.00843953
191	0.000653902		191	-0.00843953
191.5	0.00260129		191.5	-0.00454475
192	0.00260129		192	-0.00324649
192.5	0.00389955		192.5	-0.00194823
193	4.77206e-06		193	-0.00194823
193.5	4.77206e-06		193.5	-0.000649974
194	-0.000644358		194	-0.00194823
194.5	0.00260129		194.5	-0.00324649
195	0.00130303		195	-0.00324649
195.5	-0.00194262		195.5	-0.00324649
196	-0.00389001		196	-0.00584301
196.5	-0.00389001		196.5	-0.0077904
197	-0.000644358		197	-0.00649214
197.5	0.00195216		197.5	-0.00389562
198	0.00389955		198	-0.00389562
198.5	0.00260129		198.5	-0.00389562
199	-0.00194262		199	-0.00389562
199.5	-0.00194262		199.5	-0.0012991
200	0.00130303		200	-0.000649974
200.5	0.00260129		200.5	-0.0012991
201	-0.00259175		201	-0.0077904
201.5	-0.00713566		201.5	-0.0123343
202	-0.0129778		202	-0.0116852
202.5	-0.0175217		202.5	-0.00714128
203	-0.0123287		203	-8.43629e-07
203.5	-0.00453914		203.5	0.00454307
204	-0.000644358		204	0.00584133
204.5	0.00195216		204.5	0.00454307
205	0.00130303		205	0.00259568
205.5	0.000653902		205.5	0.00129742
206	0.00325042		206	-8.43629e-07
206.5	0.00454868		206.5	0.00194655
207	0.00909259		207	0.00129742
207.5	0.00584694		207.5	-0.00454475
208	0.00325042		208	-0.00584301
208.5	0.00260129		208.5	-0.0077904
209	4.77206e-06		209	-0.00649214
209.5	-0.00324088		209.5	-0.00389562
210	-0.00843392		210	-0.00389562
210.5	-0.0110304		210.5	-0.00324649
211	-0.00908305		211	-0.00389562
211.5	-0.00453914		211.5	-0.00454475
212	-0.00324088		212	-0.00649214
212.5	-0.000644358		212.5	-0.0110361
213	0.00454868		213	-0.0110361
213.5	0.00649607		213.5	-0.00843953
214	0.00584694		214	-0.00908866
214.5	0.00260129		214.5	-0.00908866
215	-0.00194262		215	-0.00908866
215.5	-0.000644358		215.5	-0.0123343
216	0.00195216		216	-0.0077904
216.5	0.00389955		216.5	-0.00324649
217	0.00325042		217	-0.00194823
217.5	0.00519781		217.5	-0.000649974
218	0.00584694		218	-8.43629e-07
218.5	0.00584694		218.5	0.00259568
219	0.00389955		219	0.00129742
219.5	0.00389955		219.5	0.00129742
220	-0.000644358		220	0.00259568
220.5	-0.00518827		220.5	0.00259568
221	-0.00973218		221	0.00713959
221.5	-0.00973218		221.5	0.0051922
222	-0.00778479		222	0.00778872
222.5	-0.00389001		222.5	0.00389394
223	-0.00194262		223	-0.0012991
223.5	0.00130303		223.5	-0.00389562
224	0.00519781		224	-0.000649974
224.5	0.00779433		224.5	0.00389394
225	0.01104		225	0.00649046
225.5	0.00844346		225.5	0.00649046
226	0.00649607		226	0.00324481
226.5	0.00584694		226.5	-0.00259736
227	0.00779433		227	-0.00649214
227.5	0.0116891		227.5	-0.00584301
228	0.00974172		228	0.00194655
228.5	0.00909259		228.5	0.00649046
229	0.0103909		229	0.0051922
229.5	0.00779433		229.5	0.00584133
230	0.00779433		230	0.00454307
230.5	0.00974172		230.5	0.000648287
231	0.0103909		231	-0.00194823
231.5	0.0116891		231.5	-0.00194823
232	0.00909259		232	-0.00259736
232.5	0.00649607		232.5	-0.00389562
233	0.00260129		233	-0.00259736
233.5	4.77206e-06		233.5	-0.000649974
234	-0.000644358		234	0.00454307
234.5	0.00130303		234.5	0.0103852
235	0.000653902		235	0.00713959
235.5	4.77206e-06		235.5	0.00713959
236	4.77206e-06		236	0.00194655
236.5	-0.00194262		236.5	-0.00324649
237	-0.00389001		237	-0.00324649
237.5	-0.00259175		237.5	0.00324481
238	-0.00259175		238	0.00908698
238.5	-0.00518827		238.5	0.0110344
239	-0.00908305		239	0.00843785
239.5	-0.0116796		239.5	0.0051922
240	-0.0103813		240	0.00389394
240.5	-0.00453914		240.5	0.00324481
241	-0.000644358		241	-8.43629e-07
241.5	0.00389955		241.5	-0.00194823
242	0.00260129		242	-0.00259736
242.5	0.00130303		242.5	0.000648287
243	0.00130303		243	-8.43629e-07
243.5	0.00260129		243.5	-0.00194823
244	0.0071452		244	-0.00519388
244.5	0.00844346		244.5	-0.00584301
245	0.00325042		245	-0.00649214
245.5	-0.00389001		245.5	-0.00519388
246	-0.0058374		246	-0.00454475
246.5	-0.00389001		246.5	-0.0012991
247	0.000653902		247	0.000648287
247.5	0.00454868		247.5	-0.00194823
248	0.00844346		248	-0.00973779
248.5	0.0116891		248.5	-0.0142817
249	0.00844346		249	-0.0175274
249.5	0.00909259		249.5	-0.01558
250	0.0103909		250	-0.0129834
250.5	0.0116891		250.5	-0.00908866
251	0.0116891		251	-0.00649214
251.5	0.0103909		251.5	-0.00259736
252	0.00779433		252	-8.43629e-07
252.5	0.00779433		252.5	-8.43629e-07
253	0.00844346		253	-8.43629e-07
253.5	0.0071452		253.5	-0.00454475
254	0.00909259		254	-0.00454475
254.5	0.00909259		254.5	-0.00519388
255	0.0071452		255	-0.00259736
255.5	0.00130303		255.5	-0.00259736
256	-0.0058374		256	-0.00389562
256.5	-0.0116796		256.5	-0.00324649
257	-0.0116796		257	-0.00389562
257.5	-0.0123287		257.5	-0.00843953
258	-0.0116796		258	-0.0116852
258.5	-0.0110304		258.5	-0.0116852
259	-0.00778479		259	-0.00649214
259.5	-0.00713566		259.5	0.00129742
260	-0.00453914		260	0.00649046
260.5	-0.00259175		260.5	0.0051922
261	-0.00259175		261	0.0051922
261.5	-0.000644358		261.5	0.00454307
262	0.00260129		262	0.00584133
262.5	0.00649607		262.5	0.00713959
263	0.00584694		263	0.00649046
263.5	0.00649607		263.5	0.00778872
264	0.00389955		264	0.00778872
264.5	4.77206e-06		264.5	0.0103852
265	0.00389955		265	0.0110344
265.5	0.0071452		265.5	0.00713959
266	0.0071452		266	0.00259568
266.5	0.00844346		266.5	-0.000649974
267	0.0103909		267	-8.43629e-07
267.5	0.00974172		267.5	0.00454307
268	0.00649607		268	0.00454307
268.5	0.00389955		268.5	0.00649046
269	-0.000644358		269	0.00129742
269.5	-0.00324088		269.5	0.000648287
270	-0.00324088		270	-0.0012991
270.5	-0.000644358		270.5	-0.00454475
271	0.00389955		271	-0.00454475
271.5	0.00909259		271.5	-0.00194823
272	0.0103909		272	-0.00194823
272.5	0.00909259		272.5	-0.00194823
273	0.00454868		273	-0.00519388
273.5	-0.00259175		273.5	-0.00843953
274	-0.00453914		274	-0.0077904
274.5	-0.00389001		274.5	-0.00389562
275	-0.00129349		275	0.00324481
275.5	-0.00129349		275.5	0.00259568
276	-0.00389001		276	-0.000649974
276.5	-0.00713566		276.5	-0.000649974
277	-0.013627		277	0.0051922
277.5	-0.0149252		277.5	0.0116835
278	-0.00973218		278	0.0129818
278.5	-0.0110304		278.5	0.00908698
279	-0.0116796		279	0.00778872
279.5	-0.0116796		279.5	0.00778872
280	-0.00908305		280	0.0051922
280.5	-0.00713566		280.5	0.00324481
281	-0.00518827		281	-0.0012991
281.5	-0.00648653		281.5	-0.00324649
282	-0.0116796		282	-0.00259736
282.5	-0.013627		282.5	-0.000649974
283	-0.0116796		283	-0.00194823
283.5	-0.00518827		283.5	-0.00194823
284	4.77206e-06		284	0.00324481
284.5	-0.00129349		284.5	0.00843785
285	-0.00518827		285	0.0116835
285.5	-0.00518827		285.5	0.0116835
286	4.77206e-06		286	0.00389394
286.5	0.00519781		286.5	-0.00259736
287	0.00909259		287	-0.00714128
287.5	0.0116891		287.5	-0.0077904
288	0.0123382		288	-0.00714128
288.5	0.0129874		288.5	-0.0103869
289	0.0116891		289	-0.0181765
289.5	0.00909259		289.5	-0.0168782
290	0.00519781		290	-0.0123343
290.5	0.00454868		290.5	-0.0077904
291	0.00325042		291	-0.00454475
291.5	0.00325042		291.5	-0.0012991
292	0.00325042		292	-0.0012991
292.5	-0.00259175		292.5	0.00129742
293	-0.00648653		293	0.00778872
293.5	-0.00713566		293.5	0.00843785
294	-0.00778479		294	0.00649046
294.5	-0.00648653		294.5	0.00324481
295	-0.00324088		295	0.00129742
295.5	-0.000644358		295.5	0.00389394
296	0.00260129		296	0.00584133
296.5	0.00130303		296.5	0.0110344
297	-0.00259175		297	0.0136309
297.5	-0.00129349		297.5	0.0155783
298	0.00195216		298	0.01428
298.5	0.00519781		298.5	0.0168765
299	0.00454868		299	0.0168765
299.5	-0.00194262		299.5	0.0181748
300	-0.00648653		300	0.0116835
300.5	-0.00843392		300.5	0.0051922
301	-0.00713566		301	0.00129742
301.5	-0.00194262		301.5	-8.43629e-07
302	0.00260129		302	0.00389394
302.5	4.77206e-06		302.5	0.0103852
303	-0.00259175		303	0.00584133
303.5	-0.00518827		303.5	-0.00194823
304	-0.00843392		304	-0.00908866
304.5	-0.00973218		304.5	-0.0129834
305	-0.0103813		305	-0.0142817
305.5	-0.00778479		305.5	-0.0103869
306	-0.000644358		306	-0.00649214
306.5	0.00649607		306.5	-0.00584301
307	0.0116891		307	-0.00649214
307.5	0.0136365		307.5	-0.00908866
308	0.0142856		308	-0.0129834
308.5	0.0116891		308.5	-0.0142817
309	0.0103909		309	-0.0116852
309.5	0.00844346		309.5	-0.00649214
310	0.00519781		310	-0.00324649
310.5	0.00389955		310.5	-0.00584301
311	0.00389955		311	-0.00454475
311.5	0.00584694		311.5	-0.00259736
312	0.00974172		312	-0.00519388
312.5	0.0123382		312.5	-0.00649214
313	0.0136365		313	-0.00584301
313.5	0.016233		313.5	-8.43629e-07
314	0.0129874		314	0.00389394
314.5	0.00974172		314.5	0.00843785
315	0.0116891		315	0.0103852
315.5	0.0129874		315.5	0.00713959
316	0.00974172		316	0.00454307
316.5	0.00519781		316.5	0.00454307
317	4.77206e-06		317	0.00194655
317.5	0.00130303		317.5	0.00454307
318	0.000653902		318	0.00389394
318.5	-0.000644358		318.5	0.00194655
319	-0.000644358		319	-0.00324649
319.5	-0.00259175		319.5	-0.00584301
320	4.77206e-06		320	-0.00519388
320.5	-0.00259175		320.5	-0.00324649
321	-0.00389001		321	-0.00519388
321.5	-0.00713566		321.5	-0.00714128
322	-0.00778479		322	-0.00649214
322.5	-0.00518827		322.5	-0.000649974
323	4.77206e-06		323	0.00194655
323.5	-0.000644358		323.5	0.00778872
324	-0.00194262		324	0.0129818
324.5	-0.00194262		324.5	0.0116835
325	0.000653902		325	0.00713959
325.5	0.00325042		325.5	0.00259568
326	0.00195216		326	0.00389394
326.5	0.00195216		326.5	0.00973611
327	0.00649607		327	0.0168765
327.5	0.01104		327.5	0.0194731
328	0.0116891		328	0.0149291
328.5	0.00909259		328.5	0.0051922
329	0.00389955		329	-8.43629e-07
329.5	-0.00194262		329.5	-0.00324649
330	-0.0058374		330	-0.00519388
330.5	-0.0058374		330.5	-0.00194823
331	4.77206e-06		331	-0.00454475
331.5	0.00389955		331.5	-0.00389562
332	0.00779433		332	-0.0077904
332.5	0.01104		332.5	-0.00843953
333	0.00909259		333	-0.0077904
333.5	0.0071452		333.5	-0.00519388
334	0.00649607		334	-0.00324649
334.5	0.00389955		334.5	-8.43629e-07
335	0.00325042		335	-0.000649974
335.5	0.00260129		335.5	-0.00389562
336	-0.000644358		336	-0.0077904
336.5	-0.00713566		336.5	-0.00714128
337	-0.00973218		337	-0.00649214
337.5	-0.00778479		337.5	-0.00714128
338	-0.00324088		338	-0.00714128
338.5	-0.00453914		338.5	-0.00194823
339	-0.00778479		339	0.00454307
339.5	-0.00843392		339.5	0.00778872
340	-0.00713566		340	0.00843785
340.5	-0.000644358		340.5	0.00584133
341	4.77206e-06		341	0.00259568
341.5	4.77206e-06		341.5	-8.43629e-07
342	-0.00259175		342	-0.0012991
342.5	-0.00713566		342.5	0.000648287
343	-0.0123287		343	0.00778872
343.5	-0.0129778		343.5	0.00973611
344	-0.00778479		344	0.0110344
344.5	-0.000644358		344.5	0.00973611
345	0.00130303		345	0.00584133
345.5	0.00130303		345.5	0.00454307
346	0.00584694		346	0.00259568
346.5	0.0123382		346.5	-0.000649974
347	0.0168822		347	-0.00389562
347.5	0.00909259		347.5	-0.00259736
348	0.00454868		348	-8.43629e-07
348.5	4.77206e-06		348.5	0.00194655
349	-0.00194262		349	0.00324481
349.5	-0.00129349		349.5	0.00454307
350	0.00389955		350	0.0051922
350.5	0.00779433		350.5	0.0051922
351	0.0116891		351	-8.43629e-07
351.5	0.0149348		351.5	-0.00714128
352	0.0136365		352	-0.0110361
352.5	0.00974172		352.5	-0.0116852
353	0.00779433		353	-0.0129834
353.5	0.00649607		353.5	-0.0123343
354	0.0103909		354	-0.0123343
354.5	0.01104		354.5	-0.00843953
355	0.00779433		355	-0.00324649
355.5	0.00130303		355.5	0.00129742
356	-0.00453914		356	0.00129742
356.5	-0.00648653		356.5	-8.43629e-07
357	-0.00648653		357	-8.43629e-07
357.5	-0.00648653		357.5	0.00389394
358	-0.00778479		358	0.00194655
358.5	-0.00973218		358.5	0.0051922
359	-0.0103813		359	0.00778872
359.5	-0.0116796		359.5	0.00454307
360	-0.0103813		360	-8.43629e-07
360.5	-0.00648653		360.5	-8.43629e-07
361	-0.00778479		361	0.00389394
361.5	-0.00389001		361.5	0.00649046
362	-0.000644358		362	0.00778872
362.5	4.77206e-06		362.5	0.0116835
363	-0.00194262		363	0.0129818
363.5	-0.00843392		363.5	0.0136309
364	-0.0123287		364	0.0123326
364.5	-0.0116796		364.5	0.0110344
365	-0.0058374		365	0.00973611
365.5	0.00195216		365.5	0.0051922
366	0.00649607		366	0.00454307
366.5	0.00454868		366.5	0.0051922
367	4.77206e-06		367	0.00389394
367.5	-0.00259175		367.5	0.00194655
368	-0.00713566		368	-0.00324649
368.5	-0.00453914		368.5	-0.00649214
369	0.00195216		369	-0.00649214
369.5	0.00519781		369.5	-0.00194823
370	0.00389955		370	-0.00519388
370.5	4.77206e-06		370.5	-0.0110361
371	-0.00194262		371	-0.0123343
371.5	-0.00389001		371.5	-0.0116852
372	-0.000644358		372	-0.0110361
372.5	0.00454868		372.5	-0.00649214
373	0.00844346		373	-0.00259736
373.5	0.0103909		373.5	-0.00194823
374	0.00909259		374	-0.00324649
374.5	0.0071452		374.5	-0.00259736
375	0.00519781		375	-8.43629e-07
375.5	0.00519781		375.5	0.00194655
376	0.00195216		376	0.00129742
376.5	0.00325042		376.5	-8.43629e-07
377	0.00454868		377	0.00259568
377.5	0.0071452		377.5	0.00843785
378	0.00909259		378	0.00843785
378.5	0.00909259		378.5	0.01428
379	0.00649607		379	0.0168765
379.5	0.00649607		379.5	0.0149291
380	0.00454868		380	0.0110344
380.5	0.00584694		380.5	0.00843785
381	0.00649607		381	0.0051922
381.5	0.00584694		381.5	-0.00194823
382	0.00195216		382	-0.00649214
382.5	-0.00518827		382.5	-0.00843953
383	-0.00778479		383	-0.00649214
383.5	-0.00648653		383.5	-0.00389562
384	-0.00389001		384	0.000648287
384.5	-0.000644358		384.5	0.00649046
385	0.00130303		385	0.00713959
385.5	0.00325042		385.5	0.00973611
386	0.00325042		386	0.0129818
386.5	0.00454868		386.5	0.0116835
387	0.00584694		387	0.00713959
387.5	0.00389955		387.5	0.00454307
388	0.00260129		388	0.00324481
388.5	0.00130303		388.5	0.00194655
389	0.00260129		389	-0.00194823
389.5	0.000653902		389.5	-0.00389562
390	0.00454868		390	-0.00714128
390.5	0.0103909		390.5	-0.0110361
391	0.0149348		391	-0.0103869
391.5	0.0129874		391.5	-0.0136326
392	0.0071452		392	-0.00454475
392.5	0.00130303		392.5	0.00259568
393	-0.00129349		393	0.00389394
393.5	4.77206e-06		393.5	-8.43629e-07
394	0.00389955		394	-0.000649974
394.5	0.00389955		394.5	-0.00389562
395	0.00325042		395	-0.00649214
395.5	0.000653902		395.5	-0.00843953
396	-0.00648653		396	-0.0103869
396.5	-0.0103813		396.5	-0.0103869
397	-0.0110304		397	-0.00584301
397.5	-0.0058374		397.5	-0.00519388
398	-0.00324088		398	-0.00519388
398.5	-0.00129349		398.5	0.00194655
399	0.00195216		399	0.00584133
399.5	0.00389955		399.5	0.00843785
400	0.00325042		400	0.00584133
400.5	0.00454868		400.5	0.00129742
401	0.00909259		401	-0.00519388
401.5	0.0116891		401.5	-0.0123343
402	0.0116891		402	-0.0129834
402.5	0.00909259		402.5	-0.00973779
403	0.00779433		403	-0.00389562
403.5	0.00325042		403.5	-8.43629e-07
404	-0.000644358		404	0.00129742
404.5	-0.00129349		404.5	0.00324481
405	-0.00389001		405	0.00649046
405.5	-0.00389001		405.5	0.00259568
406	-0.000644358		406	0.00649046
406.5	0.00325042		406.5	0.00389394
407	0.00909259		407	-0.0012991
407.5	0.01104		407.5	-0.0077904
408	0.00909259		408	-0.0116852
408.5	0.00454868		408.5	-0.0123343
409	-0.00324088		409	-0.00908866
409.5	-0.00648653		409.5	-0.0077904
410	-0.00908305		410	-0.00649214
410.5	-0.00518827		410.5	-0.00259736
411	0.00325042		411	0.000648287
411.5	0.00909259		411.5	-0.00259736
412	0.0103909		412	-0.0116852
412.5	0.00974172		412.5	-0.0136326
413	0.00909259		413	-0.0123343
413.5	0.00779433		413.5	-0.0123343
414	0.0103909		414	-0.0116852
414.5	0.00844346		414.5	-0.00714128
415	0.00195216		415	-0.00194823
415.5	-0.00453914		415.5	0.00194655
416	-0.00778479		416	0.00259568
416.5	-0.00648653		416.5	0.00259568
417	-0.00908305		417	0.00259568
417.5	-0.00713566		417.5	0.00194655
418	-0.00324088		418	-0.0012991
418.5	-0.00389001		418.5	-0.00259736
419	-0.00389001		419	0.00194655
419.5	-0.00259175		419.5	-0.000649974
420	-0.00259175		420	0.00194655
420.5	-0.00453914		420.5	-8.43629e-07
421	-0.00648653		421	-0.00389562
421.5	-0.00648653		421.5	-0.00519388
422	-0.00908305		422	-0.0012991
422.5	-0.0142761		422.5	0.00454307
423	-0.0162235		423	0.00908698
423.5	-0.0142761		423.5	0.00908698
424	-0.0149252		424	0.00584133
424.5	-0.0116796		424.5	0.00324481
425	-0.00713566		425	-0.00389562
425.5	0.000653902		425.5	-0.00649214
426	0.00779433		426	-0.00649214
426.5	0.0123382		426.5	-0.00259736
427	0.0123382		427	0.000648287
427.5	0.01104		427.5	0.00194655
428	0.0103909		428	-0.0012991
428.5	0.00909259		428.5	-0.00389562
429	0.00909259		429	-0.00389562
429.5	0.00844346		429.5	-0.00454475
430	0.0071452		430	-0.0077904
430.5	0.0071452		430.5	-0.0110361
431	0.00195216		431	-0.0123343
431.5	-0.00324088		431.5	-0.00714128
432	0.00130303		432	-0.00454475
432.5	0.00454868		432.5	-8.43629e-07
433	0.00130303		433	0.00194655
433.5	-0.00194262		433.5	-0.00259736
434	-0.00259175		434	-0.00519388
434.5	0.00130303		434.5	-0.00584301
435	0.00519781		435	-0.00649214
435.5	0.0123382		435.5	-0.00714128
436	0.0168822		436	-0.00973779
436.5	0.0155839		436.5	-0.0116852
437	0.00844346		437	-0.0077904
437.5	0.00130303		437.5	-0.00259736
438	-0.00713566		438	0.00259568
438.5	-0.0103813		438.5	0.00454307
439	-0.013627		439	0.00649046
439.5	-0.0129778		439.5	0.00194655
440	-0.00648653		440	-8.43629e-07
440.5	-0.00259175		440.5	-0.00519388
441	-0.00389001		441	-0.00584301
441.5	-0.00648653		441.5	-0.00519388
442	-0.00778479		442	-0.00584301
442.5	-0.00973218		442.5	-0.00584301
443	-0.0116796		443	-0.00194823
443.5	-0.0149252		443.5	0.00259568
444	-0.0168726		444	0.00713959
444.5	-0.0162235		444.5	0.00843785
445	-0.0162235		445	0.00713959
445.5	-0.0149252		445.5	0.0051922
446	-0.0103813		446	-8.43629e-07
446.5	-0.00518827		446.5	-0.00519388
447	0.000653902		447	-0.00519388
447.5	0.0071452		447.5	-0.00649214
448	0.0116891		448	-0.00649214
448.5	0.01104		448.5	-0.00649214
449	0.00974172		449	-0.00908866
449.5	0.00844346		449.5	-0.00908866
450	0.00779433		450	-0.00714128
450.5	0.00649607		450.5	-0.00649214
451	0.00389955		451	-0.00584301
451.5	0.00260129		451.5	-0.00843953
452	-0.000644358		452	-0.0116852
452.5	4.77206e-06		452.5	-0.0123343
453	0.00260129		453	-0.00389562
453.5	0.0071452		453.5	-8.43629e-07
454	0.0103909		454	-0.00389562
454.5	0.00974172		454.5	-0.00714128
455	0.00779433		455	-0.0077904
455.5	0.00195216		455.5	-0.00324649
456	-0.00389001		456	-0.0012991
456.5	-0.00713566		456.5	-0.00389562
457	-0.00453914		457	-0.00649214
457.5	-0.00129349		457.5	-0.00519388
458	0.00195216		458	-0.00519388
458.5	0.00519781		458.5	-0.00324649
459	0.00519781		459	0.000648287
459.5	0.00584694		459.5	0.00454307
460	0.00519781		460	0.00843785
460.5	-0.000644358		460.5	0.0110344
461	-0.00129349		461	0.0129818
461.5	4.77206e-06		461.5	0.0103852
462	4.77206e-06		462	0.00713959
462.5	-0.000644358		462.5	0.00259568
463	-0.00194262		463	0.000648287
463.5	-0.00389001		463.5	0.00584133
464	-0.00389001		464	0.0116835
464.5	-0.00259175		464.5	0.0110344
465	-0.00389001		465	0.00584133
465.5	-0.00908305		465.5	0.0051922
466	-0.00713566		466	0.00649046
466.5	-0.00129349		466.5	0.00194655
467	0.00130303		467	0.00324481
467.5	0.00779433		467.5	0.00259568
468	0.01104		468	-8.43629e-07
468.5	0.0116891		468.5	-0.00389562
469	0.00974172		469	-0.00714128
469.5	0.00844346		469.5	-0.0123343
470	0.00974172		470	-0.01558
470.5	0.00974172		470.5	-0.0142817
471	0.0071452		471	-0.0129834
471.5	0.00454868		471.5	-0.0129834
472	0.00260129		472	-0.0194747
472.5	-0.00129349		472.5	-0.0233695
473	-0.000644358		473	-0.0162291
473.5	0.00260129		473.5	-0.00649214
474	0.00584694		474	0.00389394
474.5	0.00779433		474.5	0.0123326
475	0.00389955		475	0.0136309
475.5	-0.00129349		475.5	0.00713959
476	-0.00518827		476	-0.00454475
476.5	-0.00843392		476.5	-0.0110361
477	-0.0123287		477	-0.0077904
477.5	-0.0123287		477.5	-0.000649974
478	-0.00778479		478	0.0051922
478.5	-0.00324088		478.5	0.00843785
479	-0.00453914		479	0.0110344
479.5	-0.0058374		479.5	0.0155783
480	-0.00259175		480	0.0136309
480.5	-0.00194262		480.5	0.0116835
481	-0.00324088		481	0.00843785
481.5	-0.00648653		481.5	0.00584133
482	-0.0110304		482	0.00454307
482.5	-0.0129778		482.5	0.00259568
483	-0.00778479		483	0.00129742
483.5	-0.000644358		483.5	0.000648287
484	0.00519781		484	0.00324481
484.5	0.00649607		484.5	0.00389394
485	0.00519781		485	-0.000649974
485.5	0.00195216		485.5	-0.00324649
486	-0.000644358		486	-0.00324649
486.5	-0.00324088		486.5	-0.00389562
487	-0.00194262		487	-0.00194823
487.5	-0.00129349		487.5	-0.00519388
488	4.77206e-06		488	-0.00973779
488.5	0.00260129		488.5	-0.00714128
489	0.00325042		489	-0.00519388
489.5	0.00454868		489.5	-0.00584301
490	0.00584694		490	-0.0103869
490.5	0.00519781		490.5	-0.0129834
491	0.00260129		491	-0.0149308
491.5	0.00130303		491.5	-0.0149308
492	0.00260129		492	-0.01558
492.5	0.00454868		492.5	-0.00908866
493	0.00649607		493	-0.0012991
493.5	0.0071452		493.5	0.00713959
494	0.00260129		494	0.0051922
494.5	0.00260129		494.5	0.00259568
495	-0.00194262		495	0.00194655
495.5	-0.00389001		495.5	0.000648287
496	-0.00259175		496	-0.00194823
496.5	0.000653902		496.5	0.000648287
497	0.00195216		497	0.00259568
497.5	0.00389955		497.5	0.00584133
498	0.00325042		498	0.00713959
498.5	-0.00194262		498.5	0.00584133
499	-0.00389001		499	0.00713959
499.5	-0.00648653		499.5	0.00454307
500	-0.00713566		500	0.00324481
500.5	-0.00648653		500.5	0.00389394
501	-0.00129349		501	0.000648287
501.5	0.00130303		501.5	0.00649046
502	0.000653902		502	0.0110344
502.5	0.00260129		502.5	0.0123326
503	0.00130303		503	0.0129818
503.5	0.00389955		503.5	0.0110344
504	0.00909259		504	0.00908698
504.5	0.0129874		504.5	0.00713959
505	0.0129874		505	0.00259568
505.5	0.0129874		505.5	-0.0012991
506	0.0123382		506	-0.0012991
506.5	0.00909259		506.5	-0.00259736
507	0.00844346		507	-0.00389562
507.5	0.00909259		507.5	-0.00649214
508	0.00844346		508	-0.00843953
508.5	0.00649607		508.5	-0.0103869
509	0.00389955		509	-0.0103869
509.5	0.000653902		509.5	-0.00454475
510	-0.00453914		510	0.000648287
510.5	-0.0058374		510.5	-8.43629e-07
511	-0.00518827		511	-0.00584301
511.5	-0.00324088		511.5	-0.0103869
512	-0.00194262		512	-0.00843953
512.5	0.00260129		512.5	-0.00389562
513	0.00779433		513	-0.00259736
513.5	0.0116891		513.5	-0.00324649
514	0.00909259		514	-0.00519388
514.5	0.00389955		514.5	-0.0077904
515	0.00649607		515	-0.0116852
515.5	0.00649607		515.5	-0.0110361
516	0.00584694		516	-0.00843953
516.5	0.00130303		516.5	-0.00259736
517	-0.00129349		517	0.00454307
517.5	0.000653902		517.5	0.0051922
518	0.00130303		518	0.00389394
518.5	0.00260129		518.5	0.00584133
519	0.00195216		519	0.0110344
519.5	0.000653902		519.5	0.01428
520	4.77206e-06		520	0.0168765
520.5	4.77206e-06		520.5	0.0129818
521	4.77206e-06		521	0.00908698
521.5	-0.00324088		521.5	0.00389394
522	-0.00843392		522	-8.43629e-07
522.5	-0.00778479		522.5	-0.00324649
523	-0.00648653		523	-0.00389562
523.5	-0.00324088		523.5	0.000648287
524	-0.000644358		524	0.00454307
524.5	-0.000644358		524.5	0.00389394
525	0.00325042		525	-0.000649974
525.5	0.00260129		525.5	-0.00389562
526	-0.00194262		526	-0.00389562
526.5	-0.00778479		526.5	-0.00454475
527	-0.0103813		527	-0.00259736
527.5	-0.00713566		527.5	-8.43629e-07
528	-0.000644358		528	-0.00194823
528.5	0.00389955		528.5	0.00129742
529	0.00454868		529	-0.000649974
529.5	0.00260129		529.5	-0.000649974
530	0.000653902		530	-0.00324649
530.5	0.00195216		530.5	-0.00324649
531	-0.00129349		531	-0.00519388
531.5	-0.00129349		531.5	-0.00389562
532	-0.00194262		532	0.00259568
532.5	-0.00129349		532.5	0.00973611
533	-0.00194262		533	0.0110344
533.5	-0.00259175		533.5	0.00843785
534	-0.00259175		534	-8.43629e-07
534.5	-0.00453914		534.5	-0.00194823
535	-0.0058374		535	-0.00324649
535.5	-0.00713566		535.5	-0.0012991
536	-0.00778479		536	-8.43629e-07
536.5	-0.00713566		536.5	0.00194655
537	-0.00843392		537	0.00389394
537.5	-0.00778479		537.5	0.00584133
538	-0.00778479		538	0.00324481
538.5	-0.0103813		538.5	-8.43629e-07
539	-0.0116796		539	-0.000649974
539.5	-0.0123287		539.5	-0.000649974
540	-0.0110304		540	-0.000649974
540.5	-0.00778479		540.5	-0.000649974
541	-0.00518827		541	-8.43629e-07
541.5	-0.00389001		541.5	-0.00259736
542	-0.00389001		542	-0.0012991
542.5	-0.00518827		542.5	-0.00259736
543	-0.00129349		543	-0.00714128
543.5	0.00260129		543.5	-0.0116852
544	0.00260129		544	-0.0116852
544.5	0.00130303		544.5	-0.0103869
545	-0.00194262		545	-0.00973779
545.5	-0.00453914		545.5	-0.0116852
546	-0.00389001		546	-0.0116852
546.5	0.000653902		546.5	-0.00908866
547	0.00519781		547	-0.00454475
547.5	0.0071452		547.5	0.000648287
548	0.00389955		548	-8.43629e-07
548.5	0.00260129		548.5	-0.00259736
549	0.00389955		549	-0.00649214
549.5	0.00519781		549.5	-0.00519388
550	0.00389955		550	-0.00519388
550.5	0.00779433		550.5	-0.00389562
551	0.0103909		551	-0.000649974
551.5	0.00844346		551.5	-8.43629e-07
552	0.00584694		552	-0.000649974
552.5	0.00130303		552.5	-0.00194823
553	-0.00389001		553	-0.00649214
553.5	-0.00453914		553.5	-0.00908866
554	0.00130303		554	-0.0103869
554.5	0.00649607		554.5	-0.0110361
555	0.01104		555	-0.0103869
555.5	0.00974172		555.5	-0.0103869
556	0.00325042		556	-0.00519388
556.5	-0.00518827		556.5	-8.43629e-07
557	-0.00908305		557	-0.0012991
557.5	-0.00973218		557.5	-0.00389562
558	-0.0103813		558	-0.00194823
558.5	-0.00713566		558.5	0.00259568
559	-0.00778479		559	0.00649046
559.5	-0.0103813		559.5	0.00778872
560	-0.00778479		560	0.00649046
560.5	-0.00259175		560.5	0.000648287
561	-0.00129349		561	-0.00389562
561.5	0.00260129		561.5	-0.00194823
562	0.00649607		562	-8.43629e-07
562.5	0.0103909		562.5	-0.000649974
563	0.0129874		563	0.00389394
563.5	0.01104		563.5	0.0051922
564	0.00779433		564	0.00324481
564.5	0.00389955		564.5	-0.00259736
565	-0.00324088		565	-0.00843953
565.5	-0.00453914		565.5	-0.00908866
566	-0.00518827		566	-0.00649214
566.5	-0.00843392		566.5	-0.00324649
567	-0.0123287		567	-0.0012991
567.5	-0.0103813		567.5	0.00259568
568	-0.0058374		568	0.00584133
568.5	-0.00389001		568.5	0.00389394
569	-0.00648653		569	0.00259568
569.5	-0.00973218		569.5	-0.00259736
570	-0.00973218		570	-0.00714128
570.5	-0.00648653		570.5	-0.00843953
571	0.00260129		571	-0.0077904
571.5	0.00519781		571.5	-0.00649214
572	0.00454868		572	-0.00519388
572.5	0.00389955		572.5	-0.00519388
573	0.00130303		573	-0.00259736
573.5	4.77206e-06		573.5	-8.43629e-07
574	0.00130303		574	0.00259568
574.5	0.00195216		574.5	0.00129742
575	0.00519781		575	-0.00259736
575.5	0.0071452		575.5	-0.00584301
576	0.00389955		576	-0.0110361
576.5	-0.00129349		576.5	-0.00714128
577	-0.0058374		577	-0.00714128
577.5	-0.00648653		577.5	-0.00908866
578	-0.000644358		578	-0.00908866
578.5	0.00130303		578.5	-0.00584301
579	0.00325042		579	0.000648287
579.5	0.00649607		579.5	0.00259568
580	0.00909259		580	0.00454307
580.5	0.00974172		580.5	0.00584133
581	0.00909259		581	0.00389394
581.5	0.00779433		581.5	0.00129742
582	0.00195216		582	-0.000649974
582.5	-0.00194262		582.5	0.00584133
583	-0.00259175		583	0.01428
583.5	-0.00129349		583.5	0.0175257
584	0.00195216		584	0.0149291
584.5	0.00844346		584.5	0.00778872
585	0.00649607		585	0.00194655
585.5	0.00325042		585.5	0.00129742
586	0.00195216		586	0.00713959
586.5	0.00325042		586.5	0.01428
587	0.00389955		587	0.0162274
587.5	0.00195216		587.5	0.01428
588	0.000653902		588	0.00843785
588.5	4.77206e-06		588.5	0.00259568
589	-0.00129349		589	0.00259568
589.5	-0.00129349		589.5	-0.0012991
590	-0.000644358		590	-0.00324649
590.5	0.00389955		590.5	-0.00649214
591	0.0071452		591	-0.00649214
591.5	0.00974172		591.5	-0.00389562
592	0.00649607		592	-0.00194823
592.5	0.00195216		592.5	-0.000649974
593	0.00325042		593	-0.00584301
593.5	0.00844346		593.5	-0.0116852
594	0.0116891		594	-0.0103869
594.5	0.0103909		594.5	-0.00584301
595	0.0103909		595	-0.00649214
595.5	0.0116891		595.5	-0.0103869
596	0.0116891		596	-0.00973779
596.5	0.00909259		596.5	-0.0103869
597	0.00519781		597	-0.0103869
597.5	0.00584694		597.5	-0.0103869
598	0.00389955		598	-0.00584301
598.5	0.00130303		598.5	0.000648287
599	-0.00194262		599	0.00454307
599.5	4.77206e-06		599.5	0.0103852
600	0.00130303		600	0.0116835
600.5	0.00195216		600.5	0.0123326
601	0.00195216		601	0.0110344
601.5	0.00130303		601.5	0.00843785
602	0.00195216		602	0.00713959
602.5	0.00389955		602.5	0.00584133
603	0.00389955		603	0.00908698
603.5	0.00325042		603.5	0.00649046
604	0.00519781		604	0.00973611
604.5	0.00909259		604.5	0.0103852
605	0.0123382		605	0.0103852
605.5	0.00909259		605.5	0.00973611
606	0.00454868		606	0.0051922
606.5	-0.000644358		606.5	-8.43629e-07
607	4.77206e-06		607	-0.00324649
607.5	0.00260129		607.5	-8.43629e-07
608	0.00260129		608	-8.43629e-07
608.5	0.00454868		608.5	-8.43629e-07
609	0.00779433		609	-0.0012991
609.5	0.0071452		609.5	-8.43629e-07
610	0.0071452		610	0.000648287
610.5	0.0071452		610.5	-0.00324649
611	0.00909259		611	-0.00324649
611.5	0.00909259		611.5	0.00259568
612	0.00195216		612	0.00778872
612.5	4.77206e-06		612.5	0.00973611
613	0.00260129		613	0.00843785
613.5	0.00454868		613.5	0.00973611
614	0.00389955		614	0.0116835
614.5	0.00260129		614.5	0.0110344
615	0.00325042		615	0.0103852
615.5	0.00454868		615.5	0.00908698
616	0.00909259		616	0.00908698
616.5	0.00974172		616.5	0.00389394
617	0.00974172		617	0.00324481
617.5	0.00974172		617.5	0.0051922
618	0.00909259		618	0.00389394
618.5	0.00779433		618.5	0.00584133
619	0.00779433		619	0.00713959
619.5	0.00325042		619.5	0.00454307
620	0.000653902		620	-0.00454475
620.5	-0.000644358		620.5	-0.00714128
621	-0.00129349		621	-0.00389562
621.5	0.00130303		621.5	0.00389394
622	0.00454868		622	0.00843785
622.5	0.00519781		622.5	0.0051922
623	0.00584694		623	-0.00194823
623.5	0.00325042		623.5	-0.00259736
624	-0.00129349		624	-0.00454475
624.5	-0.00389001		624.5	-8.43629e-07
625	-0.00259175		625	0.000648287
625.5	0.00130303		625.5	-0.0012991
626	0.00519781		626	-0.00259736
626.5	0.00779433		626.5	0.000648287
627	0.00779433		627	0.00454307
627.5	0.0116891		627.5	0.00778872
628	0.0103909		628	0.00389394
628.5	0.00909259		628.5	-0.00519388
629	0.00454868		629	-0.01558
629.5	0.00389955		629.5	-0.0240187
630	0.00584694		630	-0.0279134
630.5	0.00909259		630.5	-0.0292117
631	0.00779433		631	-0.0246678
631.5	0.00260129		631.5	-0.020773
632	-0.00324088		632	-0.0142817
632.5	-0.00453914		632.5	-0.00714128
633	-0.00129349		633	-0.000649974
633.5	0.00260129		633.5	0.00194655
634	0.00649607		634	-8.43629e-07
634.5	0.00844346		634.5	-0.00324649
635	0.00844346		635	-0.00584301
635.5	0.00454868		635.5	-0.00584301
636	-0.00324088		636	-0.00519388
636.5	-0.00908305		636.5	-0.00389562
637	-0.0175217		637	-0.0077904
637.5	-0.0181709		637.5	-0.00259736
638	-0.0175217		638	0.00713959
638.5	-0.0149252		638.5	0.0149291
639	-0.0123287		639	0.0162274
639.5	-0.0103813		639.5	0.0116835
640	-0.0110304		640	0.0051922
640.5	-0.00973218		640.5	-0.00259736
641	-0.00453914		641	-0.00519388
641.5	-0.00389001		641.5	-0.00194823
642	-0.000644358		642	0.00324481
642.5	0.00130303		642.5	0.00454307
643	0.0071452		643	0.00259568
643.5	0.0142856		643.5	0.00259568
644	0.0123382		644	0.0051922
644.5	0.00779433		644.5	0.00324481
645	0.00325042		645	0.00389394
645.5	0.000653902		645.5	0.00324481
646	-0.00324088		646	0.00259568
646.5	-0.00778479		646.5	-8.43629e-07
647	-0.00843392		647	-0.0012991
647.5	-0.00259175		647.5	-0.00259736
648	0.00389955		648	-0.00519388
648.5	0.00844346		648.5	-0.00973779
649	0.0136365		649	-0.0110361
649.5	0.0123382		649.5	-0.0077904
650	0.00844346		650	-0.00389562
650.5	0.00519781		650.5	-0.00324649
651	0.00389955		651	-0.00908866
651.5	0.000653902		651.5	-0.0129834
652	-0.00194262		652	-0.0142817
652.5	-0.00194262		652.5	-0.0103869
653	0.00130303		653	-0.00454475
653.5	0.00260129		653.5	0.00129742
654	4.77206e-06		654	0.00259568
654.5	0.000653902		654.5	0.000648287
655	0.000653902		655	-0.00259736
655.5	0.00130303		655.5	-0.00714128
656	0.00195216		656	-0.0110361
656.5	0.00389955		656.5	-0.00908866
657	0.00325042		657	-0.00843953
657.5	0.00260129		657.5	-0.00584301
658	-0.000644358		658	-0.00714128
658.5	-0.0058374		658.5	-0.00714128
659	-0.0142761		659	-0.00389562
659.5	-0.0162235		659.5	-8.43629e-07
660	-0.013627		660	0.00454307
660.5	-0.00973218		660.5	0.00908698
661	-0.00713566		661	0.0116835
661.5	-0.00389001		661.5	0.0136309
662	-0.00324088		662	0.0123326
662.5	-0.00518827		662.5	0.0116835
663	-0.00648653		663	0.00713959
663.5	-0.00324088		663.5	0.00259568
664	4.77206e-06		664	0.000648287
664.5	0.00260129		664.5	-0.00259736
665	0.000653902		665	-0.0012991
665.5	-0.00324088		665.5	-0.00519388
666	-0.00648653		666	-0.00584301
666.5	-0.0123287		666.5	-0.00519388
667	-0.013627		667	-0.00259736
667.5	-0.00648653		667.5	-0.00519388
668	0.00260129		668	-0.00908866
668.5	0.00649607		668.5	-0.0123343
669	0.0103909		669	-0.0129834
669.5	0.0071452		669.5	-0.0103869
670	0.00844346		670	-0.0077904
670.5	0.00909259		670.5	-0.0116852
671	0.00909259		671	-0.0116852
671.5	0.0116891		671.5	-0.00973779
672	0.0136365		672	-0.00649214
672.5	0.0116891		672.5	-0.0012991
673	0.00779433		673	0.000648287
673.5	0.00454868		673.5	-0.000649974
674	0.00389955		674	-0.00259736
674.5	0.00519781		674.5	-0.00454475
675	0.00584694		675	-0.00649214
675.5	0.0071452		675.5	-0.00259736
676	0.00649607		676	-8.43629e-07
676.5	0.00584694		676.5	0.00194655
677	0.00454868		677	0.00259568
677.5	0.00260129		677.5	0.00194655
678	4.77206e-06		678	0.00259568
678.5	-0.00194262		678.5	0.000648287
679	-0.00129349		679	-0.00324649
679.5	0.00325042		679.5	-0.00519388
680	0.00325042		680	-0.00584301
680.5	0.00130303		680.5	-0.00454475
681	-0.000644358		681	-0.000649974
681.5	-0.00518827		681.5	0.00194655
682	-0.00648653		682	0.00129742
682.5	-0.0058374		682.5	-0.00194823
683	-0.00843392		683	-0.00454475
683.5	-0.00908305		683.5	-0.00454475
684	-0.00324088		684	0.00129742
684.5	0.00325042		684.5	0.000648287
685	0.00519781		685	0.00259568
685.5	0.00844346		685.5	0.00194655
686	0.00974172		686	0.00259568
686.5	0.00909259		686.5	0.0051922
687	0.00909259		687	0.00584133
687.5	0.0116891		687.5	0.00194655
688	0.0136365		688	-0.00519388
688.5	0.0136365		688.5	-0.0116852
689	0.0116891		689	-0.00908866
689.5	0.00389955		689.5	-0.00649214
690	0.00130303		690	-0.00649214
690.5	0.00454868		690.5	-0.0103869
691	0.00519781		691	-0.0142817
691.5	0.00260129		691.5	-0.0110361
692	0.00260129		692	-0.00649214
692.5	0.00260129		692.5	-0.00324649
693	-0.000644358		693	-0.0012991
693.5	-0.00389001		693.5	-0.00389562
694	-0.00389001		694	-0.00454475
694.5	-0.00194262		694.5	-0.00389562
695	0.00130303		695	-0.0012991
695.5	0.00130303		695.5	-0.00259736
696	-0.000644358		696	-0.00519388
696.5	-0.00648653		696.5	-0.00519388
697	-0.00648653		697	-0.000649974
697.5	-0.00453914		697.5	0.00324481
698	-0.00843392		698	0.00389394
698.5	-0.0123287		698.5	0.00843785
699	-0.00973218		699	0.00778872
699.5	-0.00453914		699.5	0.00908698
700	0.00130303		700	0.0103852
700.5	0.0071452		700.5	0.0110344
701	0.0116891		701	0.00778872
701.5	0.00649607		701.5	0.00324481
702	4.77206e-06		702	0.00454307
702.5	-0.000644358		702.5	0.0051922
703	-0.000644358		703	0.00259568
703.5	0.000653902		703.5	0.00389394
704	0.00260129		704	0.00454307
704.5	0.00454868		704.5	0.00324481
705	0.00584694		705	0.00389394
705.5	0.00649607		705.5	0.00129742
706	0.00389955		706	-0.00324649
706.5	0.00195216		706.5	-0.0116852
707	-0.00129349		707	-0.01558
707.5	-0.00129349		707.5	-0.0175274
708	-0.00259175		708	-0.0181765
708.5	-0.00259175		708.5	-0.01558
709	-0.00194262		709	-0.0123343
709.5	-0.00129349		709.5	-0.0116852
710	-0.00194262		710	-0.0103869
710.5	0.00130303		710.5	-0.0103869
711	0.000653902		711	-0.0103869
711.5	-0.00129349		711.5	-0.00908866
712	-0.00518827		712	-0.0012991
712.5	-0.0103813		712.5	0.00194655
713	-0.00973218		713	0.00259568
713.5	-0.00389001		713.5	0.00324481
714	0.00130303		714	0.000648287
714.5	0.00649607		714.5	-0.00194823
715	0.00909259		715	-0.00194823
715.5	0.00649607		715.5	0.00194655
716	0.00130303		716	0.00454307
716.5	-0.00648653		716.5	0.00454307
717	-0.0103813		717	0.00389394
717.5	-0.00453914		717.5	0.000648287
718	0.00519781		718	0.00324481
718.5	0.00649607		718.5	0.00324481
719	0.00325042		719	0.00584133
719.5	-0.00194262		719.5	0.00973611
720	-0.00389001		720	0.0123326
720.5	-0.00518827		720.5	0.0116835
721	-0.00129349		721	0.0103852
721.5	0.00389955		721.5	0.00584133
722	0.00844346		722	0.00259568
722.5	0.01104		722.5	0.00324481
723	0.00844346		723	0.000648287
723.5	0.00909259		723.5	-0.00324649
724	0.0071452		724	-0.0077904
724.5	0.00260129		724.5	-0.0110361
725	0.00195216		725	-0.0116852
725.5	0.00130303		725.5	-0.0012991
726	0.00325042		726	0.00454307
726.5	0.00584694		726.5	0.00324481
727	0.00974172		727	-0.0012991
727.5	0.0103909		727.5	-0.00454475
728	0.0103909		728	-0.0077904
728.5	0.01104		728.5	-0.0110361
729	0.0103909		729	-0.0136326
729.5	0.00779433		729.5	-0.0136326
730	0.00584694		730	-0.0116852
730.5	0.00325042		730.5	-0.0116852
731	0.00649607		731	-0.0136326
731.5	0.00779433		731.5	-0.0149308
732	0.000653902		732	-0.0110361
732.5	-0.0058374		732.5	-0.00259736
733	-0.00973218		733	0.00259568
733.5	-0.00778479		733.5	0.00649046
734	-0.00324088		734	0.0051922
734.5	-0.00129349		734.5	-0.000649974
735	-0.00129349		735	-0.00519388
735.5	-0.00389001		735.5	-0.00714128
736	-0.00908305		736	-0.00843953
736.5	-0.0155743		736.5	-0.00649214
737	-0.0149252		737	-0.00389562
737.5	-0.0116796		737.5	-0.00324649
738	4.77206e-06		738	-0.00454475
738.5	0.00844346		738.5	-0.00324649
739	0.00909259		739	-0.00324649
739.5	0.00584694		739.5	-8.43629e-07
740	-0.000644358		740	0.0103852
740.5	-0.0103813		740.5	0.0123326
741	-0.013627		741	0.00973611
741.5	-0.0129778		741.5	0.00584133
742	-0.00778479		742	0.00129742
742.5	-0.00324088		742.5	-0.0012991
743	-0.00259175		743	0.000648287
743.5	-0.00518827		743.5	0.00129742
744	-0.00778479		744	-8.43629e-07
744.5	-0.0110304		744.5	-8.43629e-07
745	-0.0058374		745	0.000648287
745.5	-0.0058374		745.5	0.000648287
746	-0.00518827		746	0.00713959
746.5	-0.00194262		746.5	0.0116835
747	-0.00129349		747	0.0155783
747.5	-0.00194262		747.5	0.0175257
748	-0.00259175		748	0.0149291
748.5	-0.00194262		748.5	0.00973611
749	-0.00324088		749	0.00454307
749.5	-0.00129349		749.5	0.000648287
750	-0.00129349		750	0.000648287
750.5	4.77206e-06		750.5	0.00259568
751	-0.00129349		751	0.00454307
751.5	-0.00389001		751.5	0.00908698
752	-0.00518827		752	0.0116835
752.5	4.77206e-06		752.5	0.0116835
753	0.00584694		753	0.00194655
753.5	0.0142856		753.5	-0.00324649
754	0.0149348		754	-0.00389562
754.5	0.00909259		754.5	-0.00389562
755	0.000653902		755	-0.00454475
755.5	-0.00324088		755.5	-0.00454475
756	-0.00389001		756	-0.000649974
756.5	-0.0058374		756.5	-0.000649974
757	-0.00778479		757	-8.43629e-07
757.5	-0.00843392		757.5	0.00129742
758	-0.0058374		758	0.00259568
758.5	-0.00259175		758.5	0.00324481
759	0.00325042		759	0.000648287
759.5	0.00519781		759.5	-0.00324649
760	0.00844346		760	-0.00389562
760.5	0.00260129		760.5	-0.00584301
761	-0.00389001		761	-0.00194823
761.5	-0.00518827		761.5	-8.43629e-07
762	-0.00194262		762	-0.000649974
762.5	0.00389955		762.5	-0.00389562
763	0.00260129		763	-0.00324649
763.5	-0.000644358		763.5	-0.00259736
764	-0.00713566		764	0.000648287
764.5	-0.0116796		764.5	-0.0012991
765	-0.0116796		765	-8.43629e-07
765.5	-0.00908305		765.5	0.00389394
766	-0.00713566		766	0.00649046
766.5	-0.00453914		766.5	0.00259568
767	0.00195216		767	0.000648287
767.5	0.00519781		767.5	-8.43629e-07
768	0.00584694		768	-0.00259736
768.5	0.00584694		768.5	-0.00259736
769	0.00454868		769	-0.00389562
769.5	0.00195216		769.5	-0.00584301
770	-0.000644358		770	-0.00324649
770.5	-0.00259175		770.5	0.00454307
771	-0.000644358		771	0.0103852
771.5	0.00195216		771.5	0.00843785
772	0.00260129		772	-8.43629e-07
772.5	0.00260129		772.5	-0.00519388
773	-0.00259175		773	-0.00843953
773.5	-0.00129349		773.5	-0.00714128
774	0.00389955		774	-0.00324649
774.5	0.00844346		774.5	-0.00454475
775	0.00844346		775	-0.00908866
775.5	0.00584694		775.5	-0.00908866
776	0.00325042		776	-0.00389562
776.5	0.00260129		776.5	-0.000649974
777	0.00325042		777	-0.000649974
777.5	0.00325042		777.5	-0.00194823
778	0.00454868		778	-0.00194823
778.5	0.00454868		778.5	0.00389394
779	0.00389955		779	0.00713959
779.5	0.00389955		779.5	0.00973611
780	-0.000644358		780	0.00389394
780.5	-0.00129349		780.5	0.00259568
781	0.00325042		781	0.00649046
781.5	0.00779433		781.5	0.00454307
782	0.00779433		782	0.0051922
782.5	0.00519781		782.5	0.0051922
783	0.00325042		783	0.00584133
783.5	0.00519781		783.5	0.00778872
784	0.00844346		784	0.0136309
784.5	0.00909259		784.5	0.0188239
785	0.00649607		785	0.0162274
785.5	0.00389955		785.5	0.0116835
786	0.00130303		786	0.00649046
786.5	0.00649607		786.5	-0.00194823
787	0.00389955		787	-0.00908866
787.5	0.00909259		787.5	-0.0123343
788	0.0129874		788	-0.0123343
788.5	0.0155839		788.5	-0.0110361
789	0.0149348		789	-0.00584301
789.5	0.0155839		789.5	-0.000649974
790	0.0168822		790	0.00454307
790.5	0.0181804		790.5	0.00713959
791	0.0214261		791	0.00324481
791.5	0.0220752		791.5	-0.0012991
792	0.0194787		792	-0.00324649
792.5	0.016233		792.5	-0.0012991
793	0.01104		793	-8.43629e-07
793.5	0.00519781		793.5	-0.00389562
794	0.00454868		794	-0.00649214
794.5	0.00519781		794.5	-0.0136326
795	0.00649607		795	-0.0123343
795.5	0.00519781		795.5	-0.00454475
796	0.00195216		796	0.00194655
796.5	-0.00453914		796.5	0.00584133
797	-0.0110304		797	0.00713959
797.5	-0.0129778		797.5	0.00908698
798	-0.00973218		798	0.0116835
798.5	-0.00713566		798.5	0.0136309
799	-0.00453914		799	0.0136309
799.5	-0.00843392		799.5	0.01428
800	-0.00973218		800	0.0110344
800.5	-0.00778479		800.5	0.00713959
801	-0.00259175		801	0.00194655
801.5	0.00519781		801.5	-0.00324649
802	0.00195216		802	-0.00324649
802.5	-0.00324088		802.5	-0.00194823
803	-0.00713566		803	-8.43629e-07
803.5	-0.0058374		803.5	-0.00194823
804	4.77206e-06		804	-0.00649214
804.5	0.00844346		804.5	-0.00973779
805	0.0149348		805	-0.00908866
805.5	0.0188295		805.5	-0.00649214
806	0.0175313		806	-0.00194823
806.5	0.016233		806.5	-0.0012991
807	0.0155839		807	0.00259568
807.5	0.0266191		807.5	0.00194655
808	0.0279174		808	0.00324481
808.5	0.0168822		808.5	-0.0012991
809	0.00454868		809	-0.00389562
809.5	-0.000644358		809.5	-0.00584301
810	-0.00194262		810	-0.00584301
810.5	0.00389955		810.5	-0.00454475
811	0.0103909		811	-0.00389562
811.5	0.0142856		811.5	-0.0012991
812	0.0116891		812	0.000648287
812.5	0.00584694		812.5	0.00324481
813	-0.000644358		813	0.00584133
813.5	-0.00453914		813.5	0.0051922
814	-0.00453914		814	0.00454307
814.5	-0.00453914		814.5	0.00129742
815	4.77206e-06		815	-0.00649214
815.5	-0.00259175		815.5	-0.0077904
816	-0.00259175		816	-0.00714128
816.5	-0.00194262		816.5	-0.00454475
817	-0.00129349		817	-0.00259736
817.5	-0.00259175		817.5	0.000648287
818	-0.0058374		818	0.00454307
818.5	-0.0110304		818.5	0.00908698
819	-0.0181709		819	0.0103852
819.5	-0.0220656		819.5	0.00908698
820	-0.0175217		820	0.00649046
820.5	-0.0129778		820.5	0.00389394
821	-0.0110304		821	-0.0012991
821.5	-0.00713566		821.5	-0.00649214
822	-0.0058374		822	-0.00649214
822.5	-0.00389001		822.5	-0.00843953
823	4.77206e-06		823	-0.00843953
823.5	-0.00129349		823.5	-0.00973779
824	-0.00389001		824	-0.0103869
824.5	0.00130303		824.5	-0.0103869
825	0.00844346		825	-0.00843953
825.5	0.0116891		825.5	-0.00259736
826	0.00909259		826	0.0051922
826.5	0.00519781		826.5	0.0123326
827	0.00130303		827	0.0123326
827.5	-0.00259175		827.5	0.00259568
828	-0.00713566		828	-0.0077904
828.5	-0.00518827		828.5	-0.0129834
829	-0.00518827		829	-0.0194747
829.5	-0.00324088		829.5	-0.0188256
830	-0.00389001		830	-0.0136326
830.5	-0.00259175		830.5	-0.00584301
831	-0.000644358		831	0.00194655
831.5	0.00130303		831.5	0.00843785
832	4.77206e-06		832	0.0103852
832.5	0.000653902		832.5	0.0116835
833	0.00260129		833	0.0110344
833.5	0.00519781		833.5	0.00454307
834	0.00909259		834	-8.43629e-07
834.5	0.00909259		834.5	-0.0012991
835	0.00649607		835	-0.00714128
835.5	0.00325042		835.5	-0.00584301
836	-0.00453914		836	-0.00454475
836.5	-0.00973218		836.5	-0.00259736
837	-0.00453914		837	-8.43629e-07
837.5	0.00325042		837.5	0.000648287
838	0.00649607		838	0.00129742
838.5	0.00325042		838.5	0.000648287
839	-0.00324088		839	-0.0012991
839.5	-0.00713566		839.5	0.000648287
840	-0.00908305		840	-0.0012991
840.5	-0.00843392		840.5	-0.00324649
841	-0.00778479		841	-0.00584301
841.5	-0.00648653		841.5	-0.000649974
842	-0.00518827		842	0.00324481
842.5	0.000653902		842.5	0.00389394
843	0.00454868		843	0.00584133
843.5	0.00584694		843.5	0.00843785
844	0.00260129		844	0.00973611
844.5	4.77206e-06		844.5	0.00908698
845	-0.00259175		845	0.00584133
845.5	-0.00259175		845.5	-0.000649974
846	-0.00129349		846	-0.00714128
846.5	0.00325042		846.5	-0.0103869
847	0.00909259		847	-0.0110361
847.5	0.00909259		847.5	-0.00843953
848	0.00325042		848	-0.0103869
848.5	0.00130303		848.5	-0.01558
849	0.00649607		849	-0.01558
849.5	0.00325042		849.5	-0.0142817
850	-0.00324088		850	-0.0103869
850.5	-0.00648653		850.5	-0.00908866
851	-0.00713566		851	-0.0103869
851.5	-0.00129349		851.5	-0.0136326
852	0.00844346		852	-0.0136326
852.5	0.016233		852.5	-0.0103869
853	0.0201278		853	-0.0077904
853.5	0.0233735		853.5	-0.00843953
854	0.0214261		854	-0.00908866
854.5	0.0129874		854.5	-0.0077904
855	0.00519781		855	-0.00519388
855.5	4.77206e-06		855.5	-0.00454475
856	0.00195216		856	-0.00259736
856.5	0.00260129		856.5	-0.00324649
857	0.00195216		857	-0.0077904
857.5	-0.00259175		857.5	-0.0103869
858	-0.00778479		858	-0.00843953
858.5	-0.0103813		858.5	-0.00584301
859	-0.0103813		859	-0.0012991
859.5	-0.00843392		859.5	0.00324481
860	-0.00259175		860	0.0051922
860.5	-0.000644358		860.5	0.00259568
861	-0.00259175		861	0.00194655
861.5	-0.00453914		861.5	0.00259568
862	-0.00259175		862	0.00649046
862.5	-0.00324088		862.5	0.00778872
863	-0.00389001		863	0.00649046
863.5	-0.00973218		863.5	0.00584133
864	-0.00908305		864	0.0051922
864.5	-0.00518827		864.5	0.00129742
865	-0.000644358		865	-8.43629e-07
865.5	0.00130303		865.5	-0.00194823
866	0.00195216		866	-0.00519388
866.5	0.00325042		866.5	-0.00908866
867	0.00909259		867	-0.00973779
867.5	0.0175313		867.5	-0.00908866
868	0.0194787		868	-0.0103869
868.5	0.0175313		868.5	-0.00714128
869	0.01104		869	-8.43629e-07
869.5	0.00909259		869.5	-0.0012991
870	0.00909259		870	-0.00454475
870.5	0.0071452		870.5	-0.00843953
871	0.00519781		871	-0.0116852
871.5	0.0071452		871.5	-0.0110361
872	0.000653902		872	-0.0077904
872.5	-0.00453914		872.5	-0.00519388
873	-0.00453914		873	-0.00324649
873.5	0.00325042		873.5	0.000648287
874	0.00649607		874	0.00259568
874.5	0.00909259		874.5	-0.0012991
875	0.01104		875	-0.00519388
875.5	0.0123382		875.5	-0.0103869
876	0.0155839		876	-0.0116852
876.5	0.0175313		876.5	-0.00454475
877	0.0214261		877	0.0051922
877.5	0.0201278		877.5	0.0129818
878	0.0240226		878	0.0188239
878.5	0.0194787		878.5	0.0201222
879	0.0142856		879	0.0207713
879.5	0.01104		879.5	0.0194731
880	0.00909259		880	0.0168765
880.5	0.0071452		880.5	0.0103852
881	0.00519781		881	0.00973611
881.5	0.00195216		881.5	0.0103852
882	-0.00259175		882	0.00778872
882.5	-0.00389001		882.5	0.0110344
883	-0.00389001		883	0.00973611
883.5	-0.00713566		883.5	0.00649046
884	-0.0058374		884	0.00194655
884.5	4.77206e-06		884.5	0.00259568
885	0.00649607		885	0.00649046
885.5	0.0071452		885.5	0.0051922
886	0.00909259		886	0.000648287
886.5	0.0116891		886.5	-0.00519388
887	0.0116891		887	-0.00843953
887.5	0.0116891		887.5	-0.00584301
888	0.00974172		888	-0.00194823
888.5	0.00779433		888.5	-0.00259736
889	0.00519781		889	-0.00649214
889.5	0.00325042		889.5	-0.00843953
890	0.00454868		890	-0.00454475
890.5	0.00649607		890.5	-0.0012991
891	0.0071452		891	-8.43629e-07
891.5	0.00325042		891.5	-8.43629e-07
892	0.00519781		892	-0.00194823
892.5	0.00389955		892.5	-0.0077904
893	4.77206e-06		893	-0.0149308
893.5	4.77206e-06		893.5	-0.0142817
894	0.00195216		894	-0.00714128
894.5	0.00130303		894.5	0.00259568
895	4.77206e-06		895	0.00649046
895.5	-0.00389001		895.5	0.00194655
896	-0.0058374		896	-8.43629e-07
896.5	-0.00453914		896.5	0.00389394
897	-0.00518827		897	0.00649046
897.5	-0.00518827		897.5	0.0051922
898	-0.00324088		898	0.00389394
898.5	-0.00259175		898.5	0.00324481
899	-0.000644358		899	0.00389394
899.5	0.00389955		899.5	0.000648287
900	0.00519781		900	-0.000649974
900.5	0.00779433		900.5	-8.43629e-07
901	0.00779433		901	0.00194655
901.5	0.00844346		901.5	0.00584133
902	0.01104		902	0.00454307
902.5	0.00909259		902.5	0.00584133
903	0.00779433		903	-0.0012991
903.5	0.00195216		903.5	-0.0077904
904	-0.00324088		904	-0.00519388
904.5	-0.00129349		904.5	-8.43629e-07
905	0.00519781		905	0.00259568
905.5	0.00909259		905.5	0.00324481
906	0.0149348		906	-0.000649974
906.5	0.0168822		906.5	-0.00389562
907	0.0168822		907	-0.00454475
907.5	0.0136365		907.5	-0.00259736
908	0.00779433		908	-8.43629e-07
908.5	0.000653902		908.5	-0.0012991
909	-0.00453914		909	-0.00259736
909.5	-0.00389001		909.5	-0.00259736
910	0.00130303		910	-0.0077904
910.5	0.00779433		910.5	-0.0077904
911	0.0123382		911	-0.0110361
911.5	0.0129874		911.5	-0.0129834
912	0.00649607		912	-0.0123343
912.5	0.000653902		912.5	-0.00973779
913	-0.00129349		913	-0.00714128
913.5	-0.00389001		913.5	-0.00194823
914	-0.00453914		914	0.00584133
914.5	-0.00129349		914.5	0.00778872
915	-0.00129349		915	0.0051922
915.5	-0.00453914		915.5	0.00259568
916	-0.00908305		916	-0.00194823
916.5	-0.00908305		916.5	-0.00454475
917	-0.00973218		917	-0.00843953
917.5	-0.00713566		917.5	-0.00843953
918	-0.00518827		918	-0.00324649
918.5	-0.000644358		918.5	0.0051922
919	-0.00259175		919	0.0149291
919.5	-0.00194262		919.5	0.0220696
920	-0.00194262		920	0.0168765
920.5	-0.00129349		920.5	0.00778872
921	-0.00129349		921	-0.00194823
921.5	-0.00194262		921.5	-0.0077904
922	-0.00389001		922	-0.0110361
922.5	-0.00518827		922.5	-0.0077904
923	-0.00453914		923	-0.000649974
923.5	-0.00518827		923.5	0.00454307
924	-0.00778479		924	0.00454307
924.5	-0.00843392		924.5	0.00649046
925	-0.00908305		925	0.00713959
925.5	-0.00648653		925.5	0.00908698
926	0.00130303		926	0.0136309
926.5	0.00519781		926.5	0.0155783
927	0.0071452		927	0.01428
927.5	0.00260129		927.5	0.00843785
928	-0.00129349		928	0.00194655
928.5	-0.00259175		928.5	-0.00324649
929	-0.00324088		929	-0.00519388
929.5	-0.0058374		929.5	-0.00584301
930	-0.0110304		930	-8.43629e-07
930.5	-0.0149252		930.5	0.00259568
931	-0.0129778		931	0.00454307
931.5	-0.00648653		931.5	0.0051922
932	4.77206e-06		932	0.00324481
932.5	0.00389955		932.5	-0.0012991
933	0.00130303		933	-0.00519388
933.5	0.00130303		933.5	-0.00649214
934	0.00130303		934	-0.00519388
934.5	0.000653902		934.5	-0.00194823
935	0.00130303		935	0.000648287
935.5	0.00260129		935.5	-8.43629e-07
936	0.000653902		936	-0.000649974
936.5	-0.00259175		936.5	-0.00908866
937	-0.00194262		937	-0.0175274
937.5	-0.00129349		937.5	-0.0181765
938	-0.00324088		938	-0.0129834
938.5	-0.00389001		938.5	-0.00454475
939	-0.00713566		939	0.00194655
939.5	-0.0110304		939.5	0.00194655
940	-0.00843392		940	-8.43629e-07
940.5	-0.00453914		940.5	-0.00454475
941	4.77206e-06		941	-0.0077904
941.5	0.00389955		941.5	-0.00908866
942	0.00260129		942	-0.00584301
942.5	0.000653902		942.5	0.00129742
943	0.00130303		943	0.00194655
943.5	0.00519781		943.5	0.00584133
944	0.00584694		944	0.0051922
944.5	0.00195216		944.5	0.00324481
945	-0.00453914		945	0.00129742
945.5	-0.00518827		945.5	0.000648287
946	-0.00129349		946	0.00324481
946.5	0.00325042		946.5	0.0110344
947	0.01104		947	0.0149291
947.5	0.01104		947.5	0.0116835
948	0.00584694		948	0.00389394
948.5	0.00389955		948.5	-0.00259736
949	0.00130303		949	-0.00519388
949.5	-0.000644358		949.5	-0.00454475
950	-0.00129349		950	-0.0077904
950.5	-0.000644358		950.5	-0.0077904
951	-0.00194262		951	-0.0077904
951.5	-0.00259175		951.5	-0.00649214
952	-0.0058374		952	-0.00454475
952.5	-0.00648653		952.5	-0.00324649
953	-0.00389001		953	-0.00259736
953.5	-0.00129349		953.5	-0.00714128
954	4.77206e-06		954	-0.0103869
954.5	0.00260129		954.5	-0.00973779
955	0.00260129		955	-0.0110361
955.5	-0.00194262		955.5	-0.00843953
956	-0.00453914		956	-0.00519388
956.5	-0.00389001		956.5	-0.00584301
957	-0.00453914		957	-0.00454475
957.5	-0.00713566		957.5	-0.00324649
958	-0.00908305		958	-0.00194823
958.5	-0.00648653		958.5	0.00129742
959	-0.00194262		959	0.0051922
959.5	-0.00129349		959.5	0.0103852
960	0.000653902		960	0.0136309
960.5	0.00130303		960.5	0.00973611
961	0.00260129		961	0.00324481
961.5	0.00519781		961.5	-0.00259736
962	4.77206e-06		962	-0.00324649
962.5	-0.00194262		962.5	-0.00194823
963	0.000653902		963	-8.43629e-07
963.5	0.00130303		963.5	0.00649046
964	-0.00129349		964	0.00778872
964.5	-0.000644358		964.5	0.00778872
965	0.00130303		965	0.00843785
965.5	0.00130303		965.5	0.00908698
966	0.000653902		966	0.0051922
966.5	0.00195216		966.5	-0.000649974
967	0.00519781		967	-0.00649214
967.5	0.00519781		967.5	-0.00584301
968	0.00454868		968	-0.00324649
968.5	0.00325042		968.5	-0.00259736
969	0.00260129		969	-0.00259736
969.5	0.00325042		969.5	-0.00259736
970	0.00325042		970	-0.0012991
970.5	0.00195216		970.5	-0.00454475
971	0.00325042		971	-0.00584301
971.5	0.00454868		971.5	-0.00454475
972	0.00130303		972	0.000648287
972.5	4.77206e-06		972.5	0.00259568
973	0.00260129		973	0.00454307
973.5	0.00454868		973.5	0.00389394
974	0.00389955		974	-8.43629e-07
974.5	4.77206e-06		974.5	-0.00389562
975	0.00130303		975	-0.00519388
975.5	0.00260129		975.5	-0.00519388
976	0.00325042		976	-0.00519388
976.5	0.00519781		976.5	-0.00389562
977	0.00454868		977	-0.00389562
977.5	0.00325042		977.5	0.000648287
978	4.77206e-06		978	-0.0012991
978.5	-0.00259175		978.5	-0.00194823
979	-0.0058374		979	-0.00454475
979.5	-0.00713566		979.5	-0.00519388
980	-0.0116796		980	-0.00389562
980.5	-0.0142761		980.5	-0.00389562
981	-0.0123287		981	-0.00389562
981.5	-0.0116796		981.5	-0.00324649
982	-0.00843392		982	-0.00194823
982.5	-0.00973218		982.5	-0.00259736
983	-0.0116796		983	-0.00194823
983.5	-0.0103813		983.5	0.00259568
984	-0.00648653		984	-8.43629e-07
984.5	-0.00518827		984.5	-0.00389562
985	-0.00453914		985	-0.0012991
985.5	-0.00389001		985.5	-0.000649974
986	-0.00518827		986	-0.00649214
986.5	-0.00129349		986.5	-0.00973779
987	0.00195216		987	-0.0077904
987.5	0.00260129		987.5	-0.00519388
988	-0.00259175		988	-0.00908866
988.5	-0.00713566		988.5	-0.0123343
989	-0.00389001		989	-0.0175274
989.5	0.000653902		989.5	-0.0194747
990	-0.00129349		990	-0.0201239
990.5	0.00130303		990.5	-0.0233695
991	0.00389955		991	-0.0162291
991.5	0.00649607		991.5	-0.00908866
992	0.00779433		992	-8.43629e-07
992.5	0.00909259		992.5	0.00194655
993	0.01104		993	-0.00194823
993.5	0.00584694		993.5	-0.00584301
994	0.00325042		994	-0.00843953
994.5	0.00389955		994.5	-0.0077904
995	0.00454868		995	-0.00519388
995.5	0.00454868		995.5	-0.00454475
996	0.00454868		996	-0.00649214
996.5	-0.00129349		996.5	-0.00584301
997	-0.00324088		997	-0.00584301
997.5	-0.00389001		997.5	-0.00194823
998	-0.000644358		998	-0.000649974
998.5	-0.00194262		998.5	0.00129742
[truncated: 18,002 more rows]
