# Supplementary material for: Analogue closed-loop optogenetic modulation of hippocampal pyramidal cells dissociates gamma frequency and amplitude
Source: eLife. 2018 Oct 23;7:e38346. doi: 10.7554/eLife.38346 (PMC6219844; doi:10.7554/eLife.38346)
Supplement: Figure 2—source data 1. [file elife-38346-fig2-data1.xlsx]

## Sheet: Sheet 1
Panel a													Panel b													Panel c													Panel d
	Time (ms)	LFP segment pre-clamp (mV)	LFP segment during clamp (mV)	LFP segment post-clamp (mV)		Time (ms)	Unclamped average LFP (mV)		Time (ms)	Clamped average LFP (mV)	LED average driver command (norm.)			Time (ms)	LFP segment pre-clamp (mV)	LFP segment during clamp (mV)	LFP segment post-clamp (mV)		Time (ms)	Unclamped average LFP (mV)		Time (ms)	Clamped average LFP (mV)	LED average driver command (norm.)			Time (ms)	LFP segment pre-clamp (mV)	LFP segment during clamp (mV)	LFP segment post-clamp (mV)		Time (ms)	Unclamped average LFP (mV)		Time (ms)	Clamped average LFP (mV)	LED average driver command (norm.)			Time (ms)	LFP segment pre-clamp (mV)	LFP segment during clamp (mV)	LFP segment post-clamp (mV)		Time (ms)	Unclamped average LFP (mV)		Time (ms)	Clamped average LFP (mV)
	0	-0.0073821	0.119847	0.00884615		0	-0.0898125		0	-0.257653	-1			0	0.012789	-0.0151236	-0.087177		0	-0.0797133		0	-0.0287928	1			0	-0.236705	0.075527	-0.184125		0	-0.1526		0	-0.0952514	-0.329805			0	0.143312	0.111505	0.0887853		0	-0.144925		0	-0.292661
	0.5	0.0101444	0.111409	0.00754789		0.176991	-0.0898125		0.140252	-0.257653	-1			0.5	0.0569299	0.000455561	-0.106002		0.165153	-0.0797133		0.199203	-0.0287928	1			0.5	-0.242547	0.0677374	-0.189967		0.167504	-0.1526		0.105485	-0.0952514	-0.329805			0.5	0.131628	0.108259	0.0829431		0.165153	-0.144925		0.25974	-0.292661
	1	0.0107935	0.097777	0.00624963		0.353982	-0.0898125		0.280505	-0.257653	-1			1	0.0764038	0.00759599	-0.117037		0.330306	-0.0797133		0.398406	-0.0287928	1			1	-0.226968	0.0580005	-0.155563		0.335008	-0.1526		0.21097	-0.0952514	-0.329805			1	0.117347	0.101768	0.0796975		0.330306	-0.144925		0.519481	-0.269328
	1.5	-0.0262069	0.0770048	-0.00868036		0.530973	-0.0822265		0.420757	-0.257653	-1			1.5	0.0848425	0.00499947	-0.121581		0.495458	-0.074307		0.59761	-0.0207761	0.939228			1.5	-0.171792	0.0424213	-0.0977908		0.502513	-0.144288		0.316456	-0.0952514	-0.329805			1.5	0.105014	0.0959257	0.0680131		0.495458	-0.137411		0.779221	-0.266335
	2	-0.100208	0.0555835	-0.0229612		0.707965	-0.0774906		0.56101	-0.232203	-0.968805			2	0.0880881	0.00499947	-0.111844		0.660611	-0.0683577		0.796813	-0.019705	0.79866			2	-0.0912995	0.0300879	-0.0997381		0.670017	-0.135519		0.421941	-0.0951874	-0.313196			2	0.0939784	0.0881362	0.0517849		0.660611	-0.12747		1.03896	-0.212403
	2.5	-0.182647	0.0270218	-0.0275051		0.884956	-0.0756489		0.701262	-0.22954	-0.957348			2.5	0.0952285	0.00889425	-0.09237		0.825764	-0.0683577		0.996016	-0.00571625	0.635454			2.5	-0.0101582	0.0112631	-0.0932468		0.837521	-0.135349		0.527426	-0.0866298	0.218035			2.5	0.0855397	0.0855397	0.0413988		0.825764	-0.127385		1.2987	-0.205713
	3	-0.229385	-0.0151717	-0.0210138		1.06195	-0.0610192		0.841515	-0.22954	-0.957348			3	0.0952285	0.0160347	-0.0702996		0.990917	-0.053165		1.19522	-0.00198375	0.780289			3	0.0560531	-0.0179478	-0.0471586		1.00503	-0.115403		0.632911	-0.0827899	0.381912			3	0.0751536	0.0829431	0.0232232		0.990917	-0.111089		1.55844	-0.137068
	3.5	-0.228735	-0.0690495	-0.0203647		1.23894	-0.0497439		0.981767	-0.216691	-0.910806			3.5	0.0893864	0.0134382	-0.0534222		1.15607	-0.0401315		1.39442	0.00522159	0.631928			3.5	0.106685	-0.0620886	0.015807		1.17253	-0.0948126		0.738397	-0.0827899	0.381912			3.5	0.0641184	0.0848905	0.00504754		1.15607	-0.0861755		1.81818	-0.128809
	4	-0.186542	-0.129419	-0.0313999		1.41593	-0.0421749		1.12202	-0.176016	-0.751441			4	0.0822459	0.00305208	-0.0495275		1.32122	-0.0379885		1.59363	0.0144717	0.6715			4	0.1333	-0.109475	0.0722813		1.34003	-0.0930991		0.843882	-0.0813454	0.427516			4	0.0517849	0.0809957	-0.00988245		1.32122	-0.0836906		2.07792	-0.0548265
	4.5	-0.103453	-0.19563	-0.0508738		1.59292	-0.0347625		1.26227	-0.171128	-0.736261			4.5	0.0738072	-0.00279009	-0.0397905		1.48637	-0.0288528		1.79283	0.0156726	0.53868			4.5	0.150826	-0.145826	0.104738		1.50754	-0.0766107		0.949367	-0.070621	0.62263			4.5	0.0426971	0.0732062	-0.0248124		1.48637	-0.0763841		2.33766	-0.0372459
	5	-0.0703477	-0.250806	-0.0580142		1.76991	-0.0247794		1.40252	-0.164866	-0.702703			5	0.0634212	-0.0144744	-0.0261588		1.65153	-0.0159742		1.99203	0.0194051	0.489923			5	0.16251	-0.153616	0.119668		1.67504	-0.0583267		1.05485	-0.0570167	0.875272			5	0.0355566	0.0667149	-0.0397424		1.65153	-0.0523521		2.5974	0.0220052
	5.5	-0.086576	-0.266385	-0.0872251		1.9469	-0.0179767		1.54278	-0.144523	-0.610073			5.5	0.0517368	-0.0157727	-0.00343922		1.81668	-0.0130553		2.19124	0.0239165	0.367029			5.5	0.160563	-0.136089	0.130054		1.84255	-0.0526255		1.16034	-0.052226	0.929088			5.5	0.0277671	0.0608727	-0.0598655		1.81668	-0.0484111		2.85714	0.0422725
	6	-0.0800847	-0.248858	-0.155384		2.12389	-0.0136924		1.68303	-0.107408	-0.466007			6	0.0439473	-0.0151236	0.057579		1.98183	-0.0111146		2.39044	0.0238841	0.350051			6	0.15537	-0.107528	0.13265		2.01005	-0.0411337		1.26582	-0.0486603	0.942717			6	0.0180301	0.0485392	-0.0760937		1.98183	-0.0420665		3.11688	0.0811482
	6.5	-0.0515229	-0.267034	-0.177454		2.30088	-0.00668085		1.82328	-0.101451	-0.440755			6.5	0.0445964	-0.0118779	0.0809477		2.14699	0.000400155		2.58964	0.0298236	0.253974			6.5	0.144335	-0.0718256	0.126159		2.17755	-0.0247867		1.37131	-0.0468866	0.910595			6.5	0.00439841	0.0349075	-0.0832341		2.14699	-0.0225562		3.37662	0.0966732
	7	-0.00932949	-0.256648	-0.141103		2.47788	0.00172941		1.96353	-0.0822544	-0.369032			7	0.0465438	-0.00863226	0.0231751		2.31214	0.00686595		2.78884	0.0340754	0.161423			7	0.130054	-0.00561429	0.116422		2.34506	-0.0172251		1.47679	-0.0348732	0.910289			7	-0.0163738	0.0277671	-0.0877781		2.31214	-0.00968574		3.63636	0.114218
	7.5	0.0354605	-0.182647	-0.086576		2.65487	0.00799533		2.10379	-0.0524517	-0.255493			7.5	0.0543334	-0.000193571	-0.0261588		2.47729	0.0104601		2.98805	0.0377106	0.00670627			7.5	0.111878	0.0235966	0.106036		2.51256	-0.00427588		1.58228	-0.0225397	0.983084			7.5	-0.042339	0.0154336	-0.0942694		2.47729	-6.161e-05		3.8961	0.125469
	8	0.0770048	-0.0729442	-0.0430843		2.83186	0.0166313		2.24404	-0.0255319	-0.139997			8	0.0536842	0.0101925	-0.0287553		2.64244	0.0186772		3.18725	0.0434878	-0.0427473			8	0.0969483	-0.00431603	0.0982465		2.68007	0.0114407		1.68776	-0.0161581	1			8	-0.0637602	0.0063458	-0.110498		2.64244	0.0137535		4.15584	0.136144
	8.5	0.102321	0.0348113	-0.0288034		3.00885	0.0270902		2.38429	-0.0126734	-0.0857691			8.5	0.0419999	0.0166838	0.00110469		2.8076	0.0303943		3.38645	0.0476747	-0.0363915			8.5	0.0833165	-0.019246	0.09565		2.84757	0.0235503		1.79325	-0.0131044	0.986524			8.5	-0.0955676	0.0063458	-0.121533		2.8076	0.0308969		4.41558	0.137316
	9	0.108163	0.120497	-0.0132243		3.18584	0.0360994		2.52454	0.0239834	0.0658149			9	0.0205786	0.0108416	0.0387542		2.97275	0.03581		3.58566	0.053809	-0.160025			9	0.0690357	0.000227878	0.0937026		3.01508	0.0414833		1.89873	-0.00505889	0.90953			9	-0.136463	0.0063458	-0.121533		2.97275	0.0430533		4.67532	0.141445
	9.5	0.103619	0.171778	0.0185831		3.36283	0.0477074		2.6648	0.0375101	0.127227			9.5	0.00110469	-0.000842699	0.0666668		3.1379	0.0448255		3.78486	0.0591643	-0.094334			9.5	0.0521583	0.0255439	0.0820183		3.18258	0.0632596		2.00422	-0.00338578	0.892308			9.5	-0.178656	0.00310015	-0.10141		3.1379	0.0617863		4.93506	0.139353
	10	0.0990752	0.190603	0.0477939		3.53982	0.059733		2.80505	0.0686492	0.254156			10	-0.00408835	-0.00149183	0.0790003		3.30306	0.0580656		3.98406	0.0657205	-0.293541			10	0.0404739	0.0372283	0.0722813		3.35008	0.0814176		2.1097	0.00717401	0.804274			10	-0.207867	-0.000794631	-0.0637602		3.30306	0.0775837		5.19481	0.142491
	10.5	0.0997243	0.191252	0.0646713		3.71681	0.0650492		2.9453	0.083226	0.310912			10.5	-0.00214096	0.00240295	0.077702		3.46821	0.0598169		4.18327	0.0659802	-0.323927			10.5	0.0339826	0.0333335	0.0638426		3.51759	0.0902843		2.21519	0.00927683	0.864046			10.5	-0.219551	-0.00598767	-0.0241633		3.46821	0.0852161		5.45455	0.144889
	11	0.101672	0.186059	0.0666187		3.89381	0.0758243		3.08555	0.106576	0.415479			11	-0.00863226	0.0056486	0.0686142		3.63336	0.0687689		4.38247	0.0662398	-0.434109			11	0.0274913	0.0216492	0.0541057		3.68509	0.108781		2.32068	0.0215463	0.813943			11	-0.203323	-0.0144264	0.00245102		3.63336	0.103377		5.71429	0.147035
	11.5	0.103619	0.176322	0.0614257		4.0708	0.085955		3.22581	0.117573	0.459894			11.5	-0.0229131	0.012789	0.0562807		3.79851	0.0770443		4.58167	0.0677004	-0.427057			11.5	0.021	-0.00107038	0.0443687		3.8526	0.125023		2.42616	0.0265473	0.838892			11.5	-0.1462	-0.0280581	0.0199775		3.79851	0.115679		5.97403	0.153436
	12	0.097777	0.167883	0.0607766		4.24779	0.0938808		3.36606	0.138984	0.550164			12	-0.0378431	0.0166838	0.0491403		3.96367	0.0805199		4.78088	0.0688688	-0.475118			12	0.00866657	-0.0276847	0.0320352		4.0201	0.133572		2.53165	0.0340992	0.848321			12	-0.146849	-0.0455846	0.0297145		3.96367	0.124236		6.23377	0.156321
	12.5	0.0847944	0.160743	0.0627239		4.42478	0.105341		3.50631	0.167126	0.674108			12.5	-0.0553696	0.0179821	0.052386		4.12882	0.0921144		4.98008	0.0675705	-0.55918			12.5	-0.00236864	-0.0484569	0.0138596		4.1876	0.149374		2.63713	0.0399139	0.853798			12.5	-0.165674	-0.0579181	0.0277671		4.12882	0.140896		6.49351	0.163047
	13	0.0718118	0.152953	0.067917		4.60177	0.110414		3.64656	0.174715	0.715068			13	-0.0806857	0.0153855	0.0608246		4.29397	0.0965353		5.17928	0.0680574	-0.512556			13	-0.0101582	-0.0633869	-0.00171951		4.35511	0.159629		2.74262	0.0399139	0.853798			13	-0.122831	-0.0644094	0.0310127		4.29397	0.1488		6.75325	0.167717
	13.5	0.05818	0.138672	0.0776539		4.77876	0.112758		3.78682	0.185932	0.77383			13.5	-0.0988613	0.0101925	0.052386		4.45912	0.099506		5.37849	0.0740618	-0.591656			13.5	-0.0237899	-0.0809134	-0.0166495		4.52261	0.163945		2.8481	0.0528234	0.895349			13.5	-0.0449355	-0.0657076	0.0336093		4.45912	0.152948		7.01299	0.173361
	14	0.0503905	0.128935	0.0796013		4.95575	0.121125		3.92707	0.197511	0.831851			14	-0.106002	-0.000842699	0.0394034		4.62428	0.105584		5.57769	0.0725688	-0.359233			14	-0.0393691	-0.104282	-0.0354743		4.69012	0.170981		2.95359	0.059717	0.89891			14	0.0258197	-0.0702515	0.0401006		4.62428	0.160593		7.27273	0.17621
	14.5	0.0451974	0.117251	0.0763557		5.13274	0.126298		4.06732	0.207515	0.882047			14.5	-0.10016	-0.0190183	0.0192803		4.78943	0.110068		5.77689	0.0773399	-0.388922			14.5	-0.064036	-0.132844	-0.0698782		4.85762	0.176769		3.05907	0.0660986	0.898637			14.5	0.0680131	-0.0890763	0.052434		4.78943	0.163448		7.53247	0.180375
	15	0.0335131	0.106865	0.0692152		5.30973	0.12983		4.20757	0.213883	0.918991			15	-0.0897735	-0.0281062	0.00240295		4.95458	0.114795		5.9761	0.0802286	-0.438376			15	-0.102984	-0.154265	-0.110124		5.02513	0.180809		3.16456	0.0728276	0.899795			15	0.0939784	-0.126726	0.0576271		4.95458	0.170124		7.79221	0.182557
	15.5	0.0198814	0.0886891	0.0594783		5.48673	0.133379		4.34783	0.217357	0.930497			15.5	-0.072247	-0.0300536	-0.0131762		5.11974	0.117707		6.1753	0.0845128	-0.519608			15.5	-0.152318	-0.147125	-0.14323		5.19263	0.182687		3.27004	0.08208	0.941226			15.5	0.114101	-0.179955	0.0608727		5.11974	0.173197		8.05195	0.183603
	16	0.00365311	0.0627239	0.0484431		5.66372	0.135761		4.48808	0.221958	0.964911			16	-0.0599135	-0.0216149	-0.0261588		5.28489	0.11883		6.3745	0.0869471	-0.42845			16	-0.194511	-0.109475	-0.171142		5.36013	0.182878		3.37553	0.0908844	0.907155			16	0.124487	-0.224095	0.0615219		5.28489	0.173021		8.31169	0.18564
	16.5	-0.0242595	0.0315657	0.0387061		5.84071	0.137144		4.62833	0.227323	0.987829			16.5	-0.0495275	-0.017071	-0.0384922		5.45004	0.122364		6.57371	0.0874015	-0.541506			16.5	-0.204897	-0.0594921	-0.193862		5.52764	0.182573		3.48101	0.0908844	0.907155			16.5	0.117996	-0.241622	0.0608727		5.45004	0.175546		8.57143	0.186884
	17	-0.0489264	-0.00673297	0.0302674		6.0177	0.139072		4.76858	0.228001	0.989069			17	-0.0242114	-0.0248605	-0.0508257		5.61519	0.124682		6.77291	0.0907445	-0.578247			17	-0.149072	-0.0205443	-0.211389		5.69514	0.181554		3.5865	0.103227	0.963952			17	0.106961	-0.23578	0.0589253		5.61519	0.17622		8.83117	0.188904
	17.5	-0.0586634	-0.0625582	0.0172848		6.19469	0.139577		4.90884	0.229633	0.993244			17.5	0.00305208	-0.0495275	-0.0495275		5.78035	0.125903		6.97211	0.0920427	-0.593789			17.5	-0.124405	0.00996483	-0.188669		5.86265	0.179526		3.69198	0.113247	0.883458			17.5	0.0998205	-0.209165	0.0491884		5.78035	0.175355		9.09091	0.188741
	18	-0.0612599	-0.124226	0.00819702		6.37168	0.139274		5.04909	0.229987	0.999855			18	0.0270699	-0.0683522	-0.0203166		5.9455	0.126466		7.17131	0.0940875	-0.631227			18	-0.134791	0.0404739	-0.207494		6.03015	0.177061		3.79747	0.114088	0.864173			18	0.0998205	-0.145551	0.0446445		5.9455	0.175085		9.35065	0.189138
	18.5	-0.0580142	-0.181349	0.00235485		6.54867	0.13967		5.18934	0.229719	1			18.5	0.0471929	-0.0800366	-0.0553696		6.11065	0.127389		7.37052	0.0948665	-0.743555			18.5	-0.110124	0.0703339	-0.221775		6.19765	0.17493		3.90295	0.120561	0.840349			18.5	0.0991714	-0.142954	0.0362058		6.11065	0.173944		9.61039	0.188687
	19	-0.0547686	-0.230034	-0.0073821		6.72566	0.1383		5.32959	0.228459	0.996275			19	0.0686142	-0.0813348	-0.118335		6.27581	0.127459		7.56972	0.0948989	-0.697632			19	-0.0536499	0.0872113	-0.182178		6.36516	0.171521		4.00844	0.122975	0.836822			19	0.103066	-0.159182	0.0251706		6.27581	0.172085		9.87013	0.188255
	19.5	-0.0528212	-0.279368	-0.0203647		6.90265	0.137824		5.46985	0.228412	0.994819			19.5	0.077702	-0.0832822	-0.136511		6.44096	0.128206		7.76892	0.0969761	-0.679266			19.5	0.000227878	0.0943517	-0.108826		6.53266	0.168901		4.11392	0.131149	0.814862			19.5	0.103066	-0.132568	0.0160828		6.44096	0.17015		10.1299	0.187515
	20	-0.0625582	-0.291701	-0.0359438		7.07965	0.136255		5.6101	0.224574	0.987709			20	0.0854916	-0.0865279	-0.117037		6.60611	0.128088		7.96813	0.0955805	-0.826917			20	0.0469652	0.0911061	-0.0322286		6.70017	0.16597		4.21941	0.13604	0.627927			20	0.097224	-0.0832341	0.00569667		6.60611	0.168049		10.3896	0.186217
	20.5	-0.0735934	-0.319614	-0.0547686		7.25664	0.135343		5.75035	0.2236	0.982458			20.5	0.0835442	-0.0904226	-0.0761418		6.77126	0.127437		8.16733	0.0957103	-0.713883			20.5	0.0781235	0.0852639	0.0339826		6.86767	0.164532		4.32489	0.138024	0.575235			20.5	0.0861888	-0.0397424	-0.00728593		6.77126	0.166337		10.6494	0.186001
	21	-0.101506	-0.324807	-0.0709968		7.43363	0.133346		5.8906	0.221624	0.981503			21	0.077702	-0.0904226	-0.0404396		6.93642	0.128304		8.36653	0.0961647	-0.797954			21	0.0988956	0.075527	0.0826674		7.03518	0.161491		4.43038	0.139816	0.536266			21	0.067364	-0.0118298	-0.0215668		6.93642	0.163302		10.9091	0.18445
	21.5	-0.173559	-0.252104	-0.0755408		7.61062	0.131688		6.03086	0.218312	0.976702			21.5	0.0751055	-0.0787383	-0.00993052		7.10157	0.127254		8.56574	0.09412	-0.663725			21.5	0.114475	0.0677374	0.119668		7.20268	0.158693		4.53586	0.147103	0.407193			21.5	0.0504866	0.0108897	-0.0390933		7.10157	0.160726		11.1688	0.18344
	22	-0.211209	-0.124875	-0.0755408		7.78761	0.130225		6.17111	0.214961	0.9557			22	0.0757546	-0.057317	0.0257716		7.26672	0.126481		8.76494	0.0941849	-0.699753			22	0.128106	0.0573513	0.138493		7.37018	0.156809		4.64135	0.147651	0.345105			22	0.0401006	0.0388023	-0.0533742		7.26672	0.158324		11.4286	0.180754
	22.5	-0.198875	0.00495137	-0.0794355		7.9646	0.128207		6.31136	0.212069	0.949159			22.5	0.0770529	-0.0281062	0.0660177		7.43187	0.12625		8.96414	0.0946393	-0.847404			22.5	0.128106	0.0411231	0.150177		7.53769	0.154739		4.74684	0.148684	0.306289			22.5	0.0413988	0.0628201	-0.0657076		7.43187	0.156473		11.6883	0.178662
	23	-0.154735	0.106216	-0.0839794		8.14159	0.12577		6.45161	0.211	0.946224			23	0.0757546	-0.00408835	0.0939303		7.59703	0.124203		9.16335	0.0938928	-0.819146			23	0.120317	0.0274913	0.139791		7.70519	0.150399		4.85232	0.150111	0.256639			23	0.0433462	0.0855397	-0.0799885		7.59703	0.151184		11.9481	0.1752
	23.5	-0.0943655	0.161392	-0.0787864		8.31858	0.124486		6.59187	0.205463	0.917991			23.5	0.0718599	0.0121399	0.106264		7.76218	0.12336		9.36255	0.0923998	-0.619909			23.5	0.112527	0.00477179	0.127457		7.8727	0.148613		4.95781	0.150111	0.256639			23.5	0.0394514	0.106312	-0.0988133		7.76218	0.149111		12.2078	0.17163
	24	-0.0352947	0.183462	-0.0534703		8.49558	0.123088		6.73212	0.203306	0.909875			24	0.057579	0.0205786	0.110159		7.92733	0.122394		9.56175	0.0932436	-0.542899			24	0.111878	-0.0185969	0.116422		8.0402	0.146361		5.06329	0.152424	0.155648			24	0.0147845	0.121242	-0.124129		7.92733	0.14705		12.4675	0.167861
	24.5	0.0211796	0.189953	-0.0223121		8.67257	0.119466		6.87237	0.199115	0.894143			24.5	0.0445964	0.0173329	0.112106		8.09249	0.119557		9.76096	0.0908418	-0.643242			24.5	0.101492	-0.0263865	0.106685		8.20771	0.140635		5.16878	0.152424	0.155648			24.5	-0.0222159	0.13033	-0.154638		8.09249	0.141591		12.7273	0.163029
	25	0.0737592	0.189304	0.00235485		8.84956	0.117191		7.01262	0.193063	0.873691			25	0.0355086	0.0114908	0.114053		8.25764	0.117666		9.96016	0.0908743	-0.860829			25	0.0917552	-0.0276847	0.100194		8.37521	0.136368		5.27426	0.151985	0.0842508			25	-0.0605146	0.128382	-0.1832		8.25764	0.136815		12.987	0.152967
	25.5	0.115303	0.178918	0.0257235		9.02655	0.117191		7.15288	0.193063	0.873691			25.5	0.0342103	0.0114908	0.114702		8.42279	0.117666		10.1594	0.0908743	-0.860829			25.5	0.0826674	-0.0244391	0.0982465		8.54271	0.136368		5.37975	0.151985	0.0842508			25.5	-0.097515	0.114101	-0.204621		8.42279	0.136815		13.2468	0.148964
	26	0.138672	0.162041	0.0737592		9.20354	0.113626		7.29313	0.186256	0.841017			26	0.0290173	0.0160347	0.117299		8.58794	0.114199		10.3586	0.0891866	-1			26	0.0722813	-0.0218425	0.0975974		8.71022	0.1308		5.48523	0.151592	0.0769507			26	-0.13841	0.0952766	-0.194885		8.58794	0.131324		13.5065	0.143158
	26.5	0.143865	0.148409	0.0614257		9.38053	0.111561		7.43338	0.185932	0.840682			26.5	0.0173329	0.0179821	0.115352		8.7531	0.112566		10.5578	0.0869146	-0.73861			26.5	0.0599478	-0.0296321	0.101492		8.87772	0.128702		5.59072	0.149425	-0.0666959			26.5	-0.172814	0.0829431	-0.122182		8.7531	0.128807		13.7662	0.138055
	27	0.142567	0.133479	0.0159866		9.55752	0.11038		7.57363	0.179784	0.812229			27	-0.000842699	0.0205786	0.107562		8.91825	0.112024		10.757	0.0861681	-0.540112			27	0.05086	-0.0413164	0.0969483		9.04523	0.126846		5.6962	0.149425	-0.0666959			27	-0.19813	0.0809957	-0.0683042		8.91825	0.126531		14.026	0.132141
	27.5	0.128286	0.116602	-0.0073821		9.73451	0.106426		7.71388	0.179011	0.812064			27.5	-0.027457	0.0264208	0.0919829		9.0834	0.108864		10.9562	0.0839286	-0.603671			27.5	0.0385265	-0.0471586	0.085913		9.21273	0.12194		5.80169	0.146993	-0.135172			27.5	-0.199428	0.0855397	-0.0631111		9.0834	0.121362		14.2857	0.12693
	28	0.108812	0.104268	0.00365311		9.9115	0.104421		7.85414	0.173054	0.792612			28	-0.0592644	0.0368068	0.0815968		9.24855	0.105713		11.1554	0.0830847	-0.66443			28	0.0229474	-0.0380708	0.0774743		9.38023	0.119488		5.90717	0.146225	-0.142412			28	-0.172165	0.0913818	-0.0449355		9.24855	0.1191		14.5455	0.121394
	28.5	0.0919348	0.0971278	0.0205305		10.0885	0.102121		7.99439	0.171575	0.785596			28.5	-0.0813348	0.0504386	0.0686142		9.41371	0.104626		11.3546	0.0811049	-0.708938			28.5	0.00866657	-0.0257373	0.0683865		9.54774	0.116614		6.01266	0.144003	-0.161305			28.5	-0.128024	0.0887853	0.00310015		9.41371	0.11609		14.8052	0.117554
	29	0.0744083	0.0912857	0.0341622		10.2655	0.0988077		8.13464	0.166601	0.767979			29	-0.0806857	0.062772	0.0582281		9.57886	0.102103		11.5538	0.079125	-0.6722			29	-0.0036669	-0.014053	0.0560531		9.71524	0.113353		6.11814	0.141306	-0.234315			29	-0.0747955	0.0881362	0.0589253		9.57886	0.113164		15.0649	0.11182
	29.5	0.0659696	0.0821978	0.0387061		10.4425	0.0966016		8.27489	0.164119	0.756883			29.5	-0.0793874	0.0686142	0.0465438		9.74401	0.0988894		11.753	0.0779242	-0.756271			29.5	-0.0263865	-0.00107038	0.0469652		9.88275	0.109882		6.22363	0.139889	-0.25853			29.5	-0.0118298	0.0842414	0.102417		9.74401	0.109801		15.3247	0.107456
	30	0.0627239	0.067917	0.0426009		10.6195	0.0934331		8.41515	0.159298	0.731485			30	-0.0839313	0.0666668	0.0368068		9.90917	0.0960709		11.9522	0.0751329	-0.555654			30	-0.058843	0.00866657	0.0326844		10.0503	0.105997		6.32911	0.136744	-0.252415			30	0.0563288	0.0855397	0.12968		9.90917	0.106059		15.5844	0.10156
	30.5	0.0633731	0.0445483	0.0445483		10.7965	0.091919		8.5554	0.156034	0.713683			30.5	-0.0904226	0.0530351	0.0264208		10.0743	0.0943134		12.1514	0.0741917	-0.537283			30.5	-0.0951942	0.021	0.0255439		10.2178	0.103887		6.4346	0.133553	-0.284995			30.5	0.10761	0.0783992	0.141365		10.0743	0.103826		15.8442	0.0989271
	31	0.0627239	0.0244253	0.0413027		10.9735	0.0896072		8.69565	0.153523	0.699766			31	-0.072247	0.0407016	0.0160347		10.2395	0.0913636		12.3506	0.0717899	-0.436939			31	-0.134791	0.030737	0.015807		10.3853	0.100578		6.54008	0.129796	-0.324603			31	0.141365	0.0641184	0.142014		10.2395	0.100298		16.1039	0.0934636
	31.5	0.0646713	0.00495137	0.032864		11.1504	0.08657		8.8359	0.149409	0.674633			31.5	-0.0397905	0.0296664	0.00240295		10.4046	0.088765		12.5498	0.0703293	-0.390315			31.5	-0.164651	0.0300879	0.000227878		10.5528	0.096162		6.64557	0.128388	-0.332817			31.5	0.149154	0.0459427	0.136172		10.4046	0.0967147		16.3636	0.0893344
	32	0.0607766	-0.0242595	0.032864		11.3274	0.0844938		8.97616	0.146048	0.664442			32	-0.0878261	0.022526	-0.0183692		10.5698	0.0858361		12.749	0.0673109	-0.444732			32	-0.187371	0.0235966	-0.0198952		10.7203	0.0929389		6.75105	0.12367	-0.413279			32	0.140067	0.0310127	0.12254		10.5698	0.0932556		16.6234	0.0865756
	32.5	0.0549344	-0.0645055	0.023127		11.5044	0.0814091		9.11641	0.142135	0.654656			32.5	-0.143651	0.0166838	-0.0378431		10.7349	0.0830888		12.9482	0.0662723	-0.469458			32.5	-0.201002	0.015807	-0.0471586		10.8878	0.0891202		6.85654	0.121247	-0.454651			32.5	0.123189	0.0199775	0.103715		10.7349	0.0894153		16.8831	0.0817432
	33	0.0471448	-0.112541	0.0101444		11.6814	0.0786602		9.25666	0.136989	0.633869			33	-0.141704	0.0153855	-0.0618609		10.9001	0.0809178		13.1474	0.0637082	-0.587433			33	-0.216582	0.0119122	-0.0718256		11.0553	0.0851814		6.96203	0.116877	-0.470652			33	0.113452	0.0154336	0.0868379		10.9001	0.0866255		17.1429	0.0790746
	33.5	0.0341622	-0.124226	0.00365311		11.8584	0.0766295		9.39691	0.133104	0.626968			33.5	-0.0865279	0.0147364	-0.0865279		11.0652	0.078004		13.3466	0.0614038	-0.525268			33.5	-0.228915	-0.000421253	-0.0958434		11.2228	0.0821194		7.06751	0.109737	-0.523341			33.5	0.0991714	0.0108897	0.077101		11.0652	0.0829907		17.4026	0.0740258
	34	0.0166357	-0.17291	0.00689876		12.0354	0.0732329		9.53717	0.125715	0.607206			34	-0.0138253	0.0140873	-0.110546		11.2304	0.0753877		13.5458	0.0610468	-0.475118			34	-0.222424	-0.0179478	-0.108826		11.3903	0.0783924		7.173	0.109161	-0.522793			34	0.0881362	0.0102406	0.0719079		11.2304	0.0785001		17.6623	0.0702752
	34.5	0.00105659	-0.234578	0.00949528		12.2124	0.0706038		9.67742	0.122174	0.594674			34.5	0.0471929	0.00759599	-0.137809		11.3955	0.0729019		13.745	0.0588722	-0.246917			34.5	-0.200353	-0.0361234	-0.114019		11.5578	0.0741148		7.27848	0.102953	-0.579041			34.5	0.0796975	0.0063458	0.062171		11.3955	0.0752204		17.9221	0.0668673
	35	-0.0138734	-0.263788	0.0101444		12.3894	0.0673292		9.81767	0.117601	0.573457			35	0.0867898	-0.00279009	-0.157932		11.5607	0.069119		13.9442	0.0570546	-0.180486			35	-0.134791	-0.0536499	-0.118563		11.7253	0.071069		7.38397	0.0952728	-0.648703			35	0.0745045	0.00245102	0.0530832		11.5607	0.0710164		18.1818	0.0620169
	35.5	-0.0242595	-0.259245	0.00495137		12.5664	0.0650092		9.95792	0.113401	0.561906			35.5	0.106264	-0.0112288	-0.162476		11.7258	0.0666213		14.1434	0.0566002	-0.0293391			35.5	-0.078966	-0.0607903	-0.117914		11.8928	0.067208		7.48945	0.0928135	-0.666438			35.5	0.0725571	-0.00858419	0.0459427		11.7258	0.066159		18.4416	0.0578696
	36	-0.0372421	-0.226788	0.000407458		12.7434	0.0615952		10.0982	0.104791	0.523216			36	0.110808	-0.017071	-0.148844		11.891	0.0632362		14.3426	0.05488	-0.0265095			36	-0.0562464	-0.064036	-0.0796151		12.0603	0.0622711		7.59494	0.086825	-0.690593			36	0.0758027	-0.0222159	0.0336093		11.891	0.0624298		18.7013	0.0528389
	36.5	-0.0495756	-0.169015	-0.00868036		12.9204	0.0569151		10.2384	0.100409	0.505719			36.5	0.114702	-0.0151236	-0.12937		12.0562	0.0581415		14.5418	0.0518616	-0.0893712			36.5	-0.0114565	-0.0555973	-0.0679308		12.2278	0.0575129		7.70042	0.0824182	-0.705072			36.5	0.0725571	-0.032602	0.022574		12.0562	0.0572421		18.961	0.0489621
	37	-0.0709968	-0.0924181	-0.0171191		13.0973	0.0543671		10.3787	0.094729	0.485697			37	0.110808	-0.0216149	-0.113791		12.2213	0.0564682		14.741	0.0502388	-0.258932			37	0.0592987	-0.0348251	-0.122458		12.3953	0.055196		7.80591	0.0730287	-0.710944			37	0.0628201	-0.0416898	0.012188		12.2213	0.0544412		19.2208	0.04312
	37.5	-0.0989094	-0.00673297	-0.0398386		13.2743	0.0489105		10.5189	0.0827392	0.429251			37.5	0.106913	-0.0326501	-0.09237		12.3865	0.0498604		14.9402	0.0485835	-0.00104262			37.5	0.122264	-0.00691255	-0.149072		12.5628	0.046722		7.91139	0.067598	-0.711066			37.5	0.0498375	-0.0494794	-0.00144376		12.3865	0.0473607		19.4805	0.0368811
	38	-0.130717	0.0672679	-0.0599616		13.4513	0.0460528		10.6592	0.0725536	0.386051			38	0.0978251	-0.0501766	-0.0326501		12.5516	0.0459142		15.1394	0.0471879	0.021551			38	0.157966	0.0411231	-0.112721		12.7303	0.0421727		8.01688	0.0673968	-0.697893			38	0.0316619	-0.0579181	-0.0144264		12.5516	0.0431279		19.7403	0.0326798
	38.5	-0.153436	0.128935	-0.0703477		13.6283	0.0418184		10.7994	0.0655086	0.357503			38.5	0.0867898	-0.0508257	-0.037194		12.7168	0.0439974		15.3386	0.0455001	0.129644			38.5	0.168353	0.0424213	-0.0406673		12.8978	0.0381954		8.12236	0.0601193	-0.726002			38.5	0.0128371	-0.0663568	-0.0267598		12.7168	0.0393942		20	0.028208
	39	-0.163173	0.162041	-0.0787864		13.8053	0.0377863		10.9397	0.058855	0.328479			39	0.0757546	-0.0313518	-0.0715979		12.8819	0.0388367		15.5378	0.0445913	-0.117624			39	0.161212	-0.019246	0.0424213		13.0653	0.0322728		8.22785	0.0551822	-0.754323			39	-0.0066368	-0.0916728	-0.0462337		12.8819	0.0344004		20.2597	0.0225101
	39.5	-0.148243	0.175673	-0.0943655		13.9823	0.0322148		11.0799	0.0486408	0.294946			39.5	0.0718599	0.00240295	-0.0651066		13.0471	0.0332436		15.7371	0.0419299	-0.169907			39.5	0.14823	-0.0581938	0.104089		13.2328	0.0242141		8.33333	0.0451527	-0.79095			39.5	-0.0280581	-0.120235	-0.0760937		13.0471	0.0267119		20.5195	0.0167581
	40	-0.126822	0.182813	-0.117734		14.1593	0.0268965		11.2202	0.0299114	0.223628			40	0.0731581	0.0244734	-0.0255096		13.2122	0.0297363		15.9363	0.0422869	-0.17696			40	0.137194	-0.058843	0.135896		13.4003	0.0163228		8.43882	0.0390454	-0.789216			40	-0.0618129	-0.148147	-0.0994624		13.2122	0.0206434		20.7792	0.00956355
	40.5	-0.0859268	0.176971	-0.132015		14.3363	0.0250697		11.3604	0.0217973	0.194774			40.5	0.062772	0.0283681	0.0153855		13.3774	0.0262926		16.1355	0.0400474	-0.230679			40.5	0.126808	-0.0387199	0.141738		13.5678	0.0129296		8.5443	0.030817	-0.849479			40.5	-0.0897254	-0.168919	-0.114392		13.3774	0.0167759		21.039	0.00469508
	41	-0.0541195	0.165286	-0.132664		14.5133	0.0193369		11.5007	0.0143037	0.164271			41	0.0549825	0.0296664	0.0419999		13.5425	0.0209882		16.3347	0.0371912	-0.0547624			41	0.115773	-0.0179478	0.134598		13.7353	0.00420359		8.64979	0.0272696	-0.848049			41	-0.117638	-0.199428	-0.127375		13.5425	0.00814657		21.2987	-0.00255354
	41.5	-0.0450316	0.149058	-0.115787		14.6903	0.0150063		11.641	-0.0066403	0.0728807			41.5	0.0497894	0.037456	0.0588773		13.7077	0.0179032		16.5339	0.0360228	0.0922052			41.5	0.10344	-0.00171951	0.128756		13.9028	-0.00426724		8.75527	0.0209886	-0.84519			41.5	-0.158533	-0.249411	-0.144902		13.7077	0.00220239		21.5584	-0.00792689
	42	-0.00803123	0.126339	-0.0794355		14.8673	0.0100613		11.7812	-0.0233936	0.00822343			42	0.0504386	0.0510877	0.0828951		13.8728	0.0128262		16.7331	0.0342702	0.184756			42	0.0885096	0.0028244	0.130054		14.0704	-0.0100084		8.86076	0.0165635	-0.827394			42	-0.208516	-0.309781	-0.155937		13.8728	-0.00449222		21.8182	-0.0174475
	42.5	0.0438992	0.108812	-0.032049		15.0442	0.00649043		11.9215	-0.0311163	-0.0244768			42.5	0.0471929	0.062772	0.103667		14.038	0.00806277		16.9323	0.0309271	0.107746			42.5	0.0781235	0.00412266	0.129405		14.2379	-0.0182893		8.96624	0.00749401	-0.901741			42.5	-0.237727	-0.343535	-0.166972		14.038	-0.0133281		22.0779	-0.0238847
	43	0.0776539	0.0984261	0.038057		15.2212	0.0029787		12.0617	-0.0511153	-0.0997082			43	0.0387542	0.0679651	0.117948		14.2031	0.005653		17.1315	0.0281359	0.264553			43	0.0820183	-0.00626342	0.121615		14.4054	-0.0254376		9.07173	-0.00277322	-0.944208			43	-0.241622	-0.366904	-0.152691		14.2031	-0.0189402		22.3377	-0.0337298
	43.5	0.08804	0.0945313	0.0834961		15.3982	0.00037566		12.202	-0.067038	-0.171502			43.5	0.0218769	0.062772	0.117948		14.3683	0.00115435		17.3307	0.0243709	0.193202			43.5	0.0833165	-0.0374217	0.115773		14.5729	-0.0312538		9.17722	-0.013013	-0.977671			43.5	-0.208516	-0.434414	-0.106603		14.3683	-0.0242637		22.5974	-0.0412309
	44	0.0796013	0.082847	0.0562326		15.5752	-0.00568124		12.3422	-0.0808416	-0.231339			44	0.00305208	0.0582281	0.104965		14.5334	-0.00496405		17.5299	0.0233323	0.0074028			44	0.0768252	-0.084159	0.106685		14.7404	-0.0416891		9.2827	-0.0161215	-0.966568			44	-0.178007	-0.427922	-0.124778		14.5334	-0.0377649		22.8571	-0.0520858
	44.5	0.0685661	0.067917	0.032864		15.7522	-0.0106273		12.4825	-0.0949411	-0.293753			44.5	-0.0151236	0.0394034	0.0952285		14.6986	-0.00892749		17.7291	0.0193726	0.173438			44.5	0.0547548	-0.125703	0.0937026		14.9079	-0.0518097		9.38819	-0.0182061	-0.983268			44.5	-0.178656	-0.319517	-0.128673		14.6986	-0.0446607		23.1169	-0.0657896
	45	0.0607766	0.0477939	0.0393553		15.9292	-0.0136882		12.6227	-0.119465	-0.399105			45	-0.0410888	0.0199295	0.0841933		14.8637	-0.0114928		17.9283	0.0175226	0.155763			45	0.03593	-0.161406	0.0820183		15.0754	-0.0572477		9.49367	-0.0278607	-0.985033			45	-0.136463	-0.174112	-0.077392		14.8637	-0.0507541		23.3766	-0.0765363
	45.5	0.0653205	0.0146883	0.0672679		16.1062	-0.0207075		12.763	-0.121336	-0.40944			45.5	-0.0592644	0.00889425	0.0757546		15.0289	-0.0182478		18.1275	0.0169708	0.316139			45.5	0.0255439	-0.180879	0.0670883		15.2429	-0.0683231		9.59916	-0.0414742	-1			45.5	-0.0410407	-0.0501285	0.00180189		15.0289	-0.0657116		23.6364	-0.0995264
	46	0.0757065	-0.0313999	0.0860926		16.2832	-0.0270294		12.9032	-0.135264	-0.46541			46	-0.0793874	0.00954338	0.0686142		15.1941	-0.0237306		18.3267	0.0147638	0.401638			46	0.0261931	-0.146476	0.0554039		15.4104	-0.0803875		9.70464	-0.0508728	-0.997871			46	0.0582762	0.0258197	0.0719079		15.1941	-0.0730099		23.8961	-0.108939
	46.5	0.0867418	-0.086576	0.0912857		16.4602	-0.0311677		13.0435	-0.162537	-0.570834			46.5	-0.101458	0.0121399	0.0562807		15.3592	-0.0270225		18.5259	0.0128164	0.580341			46.5	0.0352809	-0.140633	0.0417722		15.5779	-0.0809868		9.81013	-0.0508728	-0.997871			46.5	0.131628	0.0602236	0.117996		15.3592	-0.074362		24.1558	-0.142856
	47	0.0938822	-0.136559	0.0886891		16.6372	-0.0406538		13.1837	-0.174622	-0.621028			47	-0.121581	0.0134382	0.0458947		15.5244	-0.0374611		18.7251	0.00843479	0.603675			47	0.0287896	-0.146476	0.03593		15.7454	-0.0954727		9.91561	-0.0508728	-0.997871			47	0.165383	0.0848905	0.142014		15.5244	-0.0925786		24.4156	-0.148157
	47.5	0.0919348	-0.179402	0.0776539		16.8142	-0.05326		13.324	-0.174622	-0.621028			47.5	-0.133914	0.0186312	0.042649		15.6895	-0.048384		18.9243	0.00359877	0.51748			47.5	0.00607005	-0.102335	0.0274913		15.9129	-0.108156		10.0211	-0.0604727	-0.943874			47.5	0.173821	0.102417	0.158891		15.6895	-0.101013		24.6753	-0.185013
	48	0.0867418	-0.213805	0.0705135		16.9912	-0.0535016		13.4642	-0.187919	-0.671413			48	-0.143651	0.0186312	0.0400525		15.8547	-0.048384		19.1235	-0.00483992	0.470159			48	-0.0211934	-0.0218425	0.015807		16.0804	-0.108156		10.1266	-0.0790689	-0.80975			48	0.166681	0.118645	0.162137		15.8547	-0.101013		24.9351	-0.188637
	48.5	0.0789522	-0.24042	0.0666187		17.1681	-0.062464		13.6045	-0.22827	-0.842234			48.5	-0.150143	0.0192803	0.0257716		16.0198	-0.0609078		19.3227	-0.00779346	0.39032			48.5	-0.0523517	0.0463161	0.000877007		16.2479	-0.122357		10.2321	-0.0790689	-0.80975			48.5	0.16019	0.128382	0.158891		16.0198	-0.117751		25.1948	-0.220968
	49	0.0659696	-0.233279	0.0646713		17.3451	-0.0770569		13.7447	-0.22827	-0.842234			49	-0.149493	0.0192803	-0.000842699		16.185	-0.0719227		19.5219	-0.0231129	0.829046			49	-0.0861064	0.085913	-0.0147021		16.4154	-0.138791		10.3376	-0.0790689	-0.80975			49	0.154347	0.132926	0.151751		16.185	-0.130018		25.4545	-0.229515
	49.5	0.0490922	-0.177454	0.0575309		17.5221	-0.0770569		13.885	-0.22827	-0.842234			49.5	-0.136511	0.0173329	-0.0358957		16.3501	-0.0719227		19.7211	-0.0231129	0.829046			49.5	-0.124405	0.101492	-0.0335269		16.5829	-0.138791		10.443	-0.0790689	-0.80975			49.5	0.143961	0.136821	0.142663		16.3501	-0.130018		25.7143	-0.262674
	50	0.0302674	-0.161875	0.0490922		17.6991	-0.0898125		13.885	-0.257653	-1			50	-0.119633	0.00889425	-0.0709487		16.3501	-0.0797133		19.7211	-0.0287928	1			50	-0.172441	0.112527	-0.0568956		16.5829	-0.1526		10.443	-0.0952514	-0.329805			50	0.134224	0.147207	0.131628		16.3501	-0.144925		25.7143	-0.292661
	50.5	0.0153375	-0.152138	0.0341622		17.8761	-0.0898125		14.0252	-0.257653	-1			50.5	-0.10016	-0.00668487	-0.0917209		16.5153	-0.0797133		19.9203	-0.0287928	1			50.5	-0.222424	0.119668	-0.0906503		16.7504	-0.1526		10.5485	-0.0952514	-0.329805			50.5	0.123838	0.161488	0.121891		16.5153	-0.144925		25.974	-0.292661
	51	0.0101444	-0.0989094	0.0172848		18.0531	-0.0898125		14.1655	-0.257653	-1			51	-0.0664048	-0.0261588	-0.0982122		16.6804	-0.0797133		20.1195	-0.0287928	1			51	-0.254231	0.112527	-0.112721		16.9179	-0.1526		10.654	-0.0952514	-0.329805			51	0.112154	0.172523	0.110856		16.6804	-0.144925		26.2338	-0.269328
	51.5	0.0114427	-0.0242595	0.00235485		18.2301	-0.0822265		14.3058	-0.257653	-1			51.5	0.00240295	-0.0430362	-0.10016		16.8456	-0.074307		20.3187	-0.0207761	0.939228			51.5	-0.261372	0.0982465	-0.130896		17.0854	-0.144288		10.7595	-0.0952514	-0.329805			51.5	0.0991714	0.173821	0.0952766		16.8456	-0.137411		26.4935	-0.266335
	52	0.0120918	0.0406535	-0.00283819		18.4071	-0.0774906		14.446	-0.232203	-0.968805			52	0.0510877	-0.052124	-0.107949		17.0107	-0.0683577		20.5179	-0.019705	0.79866			52	-0.25488	0.0820183	-0.153616		17.2529	-0.135519		10.865	-0.0951874	-0.313196			52	0.0887853	0.175769	0.0783992		17.0107	-0.12747		26.7532	-0.212403
	52.5	-0.00673297	0.0847944	-0.00413645		18.5841	-0.0756489		14.5863	-0.22954	-0.957348			52.5	0.0264208	-0.0488783	-0.111844		17.1759	-0.0683577		20.7171	-0.00571625	0.635454			52.5	-0.221125	0.0521583	-0.176335		17.4204	-0.135349		10.9705	-0.0866298	0.218035			52.5	0.0855397	0.173172	0.0641184		17.1759	-0.127385		27.013	-0.205713
	53	-0.0372421	0.111409	-0.0106278		18.7611	-0.0610192		14.7265	-0.22954	-0.957348			53	0.0114908	-0.0255096	-0.1073		17.341	-0.053165		20.9163	-0.00198375	0.780289			53	-0.123756	0.015807	-0.184774		17.5879	-0.115403		11.0759	-0.0827899	0.381912			53	0.082294	0.169927	0.052434		17.341	-0.111089		27.2727	-0.137068
	53.5	-0.0735934	0.128935	-0.0190664		18.9381	-0.0497439		14.8668	-0.216691	-0.910806			53.5	0.0400525	0.0173329	-0.0949666		17.5062	-0.0401315		21.1155	0.00522159	0.631928			53.5	-0.0250882	-0.0179478	-0.163353		17.7554	-0.0948126		11.1814	-0.0827899	0.381912			53.5	0.0809957	0.167979	0.0407497		17.5062	-0.0861755		27.5325	-0.128809
	54	-0.109945	0.137374	-0.0288034		19.115	-0.0421749		15.007	-0.176016	-0.751441			54	0.0802986	-0.0235623	-0.0761418		17.6713	-0.0379885		21.3147	0.0144717	0.6715			54	0.00217527	-0.0555973	-0.0951942		17.9229	-0.0930991		11.2869	-0.0813454	0.427516			54	0.0706097	0.158891	0.032311		17.6713	-0.0836906		27.7922	-0.0548265
	54.5	-0.136559	0.138672	-0.0372421		19.292	-0.0347625		15.1473	-0.171128	-0.736261			54.5	0.104316	-0.0761418	-0.057317		17.8365	-0.0288528		21.5139	0.0156726	0.53868			54.5	0.0255439	-0.0997381	-0.0828608		18.0905	-0.0766107		11.3924	-0.070621	0.62263			54.5	0.0563288	0.1524	0.017381		17.8365	-0.0763841		28.0519	-0.0372459
	55	-0.15084	0.131532	-0.0437334		19.469	-0.0247794		15.2875	-0.164866	-0.702703			55	0.110808	-0.0813348	-0.0345975		18.0017	-0.0159742		21.7131	0.0194051	0.489923			55	0.0722813	-0.148423	-0.0757203		18.258	-0.0583267		11.4979	-0.0570167	0.875272			55	0.0511358	0.142014	0.0063458		18.0017	-0.0523521		28.3117	0.0220052
	55.5	-0.161226	0.119847	-0.0560669		19.646	-0.0179767		15.4278	-0.144523	-0.610073			55.5	0.106913	-0.0514748	0.0192803		18.1668	-0.0130553		21.9124	0.0239165	0.367029			55.5	0.116422	-0.185423	-0.0458604		18.4255	-0.0526255		11.6034	-0.052226	0.929088			55.5	0.037504	0.132277	-0.00728593		18.1668	-0.0484111		28.5714	0.0422725
	56	-0.162524	0.101672	-0.0735934		19.823	-0.0136924		15.568	-0.107408	-0.466007			56	0.100422	-0.0216149	0.0647194		18.332	-0.0111146		22.1116	0.0238841	0.350051			56	0.142387	-0.190616	-0.000421253		18.593	-0.0411337		11.7089	-0.0486603	0.942717			56	0.012188	0.12254	-0.0397424		18.332	-0.0420665		28.8312	0.0811482
	56.5	-0.15798	0.0860926	-0.0813829		20	-0.00668085		15.7083	-0.101451	-0.440755			56.5	0.100422	0.000455561	0.0329121		18.4971	0.000400155		22.3108	0.0298236	0.253974			56.5	0.150826	-0.166599	0.0437196		18.7605	-0.0247867		11.8143	-0.0468866	0.910595			56.5	-0.0131281	0.116698	-0.0832341		18.4971	-0.0225562		29.0909	0.0966732
	57	-0.132664	0.0711626	-0.0748916		20.177	0.00172941		15.8485	-0.0822544	-0.369032			57	0.0932812	0.0166838	0.00824512		18.6623	0.00686595		22.51	0.0340754	0.161423			57	0.142387	-0.0802642	0.0696848		18.928	-0.0172251		11.9198	-0.0348732	0.910289			57	-0.0293564	0.105663	-0.118287		18.6623	-0.00968574		29.3506	0.114218
	57.5	-0.101506	0.0653205	-0.0288034		20.354	0.00799533		15.9888	-0.0524517	-0.255493			57.5	0.0809477	0.0296664	0.0147364		18.8274	0.0104601		22.7092	0.0377106	0.00670627			57.5	0.131352	-0.0361234	0.0872113		19.0955	-0.00427588		12.0253	-0.0225397	0.983084			57.5	-0.0339003	0.0946275	-0.141007		18.8274	-6.161e-05		29.6104	0.125469
	58	-0.117734	0.0607766	-0.000890802		20.531	0.0166313		16.129	-0.0255319	-0.139997			58	0.0699125	0.037456	0.0355086		18.9926	0.0186772		22.9084	0.0434878	-0.0427473			58	0.122264	-0.0322286	0.0962991		19.263	0.0114407		12.1308	-0.0161581	1			58	-0.0403916	0.0816449	-0.160481		18.9926	0.0137535		29.8701	0.136144
	58.5	-0.102155	0.052987	-0.0203647		20.708	0.0270902		16.2693	-0.0126734	-0.0857691			58.5	0.0549825	0.0432981	0.0569299		19.1577	0.0303943		23.1076	0.0476747	-0.0363915			58.5	0.109931	-0.00431603	0.0969483		19.4305	0.0235503		12.2363	-0.0131044	0.986524			58.5	-0.0501285	0.0719079	-0.172165		19.1577	0.0308969		30.1299	0.137316
	59	-0.0313999	0.0438992	-0.0197156		20.885	0.0360994		16.4095	0.0239834	0.0658149			59	0.0387542	0.0530351	0.0751055		19.3229	0.03581		23.3068	0.053809	-0.160025			59	0.0969483	0.0521583	0.10344		19.598	0.0414833		12.3418	-0.00505889	0.90953			59	-0.0598655	0.062171	-0.142954		19.3229	0.0430533		30.3896	0.141445
	59.5	0.0568818	0.0257235	0.0120918		21.0619	0.0477074		16.5498	0.0375101	0.127227			59.5	0.0316138	0.0588773	0.0835442		19.488	0.0448255		23.506	0.0591643	-0.094334			59.5	0.0865622	0.111878	0.105387		19.7655	0.0632596		12.4473	-0.00338578	0.892308			59.5	-0.077392	0.0576271	-0.156586		19.488	0.0617863		30.6494	0.139353
	60	0.12504	0.00300398	0.0464957		21.2389	0.059733		16.69	0.0686492	0.254156			60	0.0264208	0.0608246	0.0848425		19.6532	0.0580656		23.7052	0.0657205	-0.293541			60	0.0761761	0.15537	0.104738		19.933	0.0814176		12.5527	0.00717401	0.804274			60	-0.104655	0.0576271	-0.189042		19.6532	0.0775837		30.9091	0.142491
	60.5	0.163339	-0.0281543	0.0698644		21.4159	0.0650492		16.8303	0.083226	0.310912			60.5	0.0186312	0.0621229	0.0841933		19.8183	0.0598169		23.9044	0.0659802	-0.323927			60.5	0.0677374	0.174195	0.104738		20.1005	0.0902843		12.6582	0.00927683	0.864046			60.5	-0.148796	0.047241	-0.171516		19.8183	0.0852161		31.1688	0.144889
	61	0.169181	-0.0696986	0.0808996		21.5929	0.0758243		16.9705	0.106576	0.415479			61	0.00954338	0.0621229	0.067316		19.9835	0.0687689		24.1036	0.0662398	-0.434109			61	0.060597	0.166405	0.0975974		20.268	0.108781		12.7637	0.0215463	0.813943			61	-0.186446	0.0342584	-0.109199		19.9835	0.103377		31.4286	0.147035
	61.5	0.163339	-0.109945	0.082847		21.7699	0.085955		17.1108	0.117573	0.459894			61.5	0.0056486	0.0510877	0.052386		20.1486	0.0770443		24.3028	0.0677004	-0.427057			61.5	0.0515091	0.139142	0.0839657		20.4355	0.125023		12.8692	0.0265473	0.838892			61.5	-0.194235	0.0180301	-0.0345494		20.1486	0.115679		31.6883	0.153436
	62	0.152953	-0.14305	0.0789522		21.9469	0.0938808		17.2511	0.138984	0.550164			62	0.00759599	0.0407016	0.0445964		20.3138	0.0805199		24.502	0.0688688	-0.475118			62	0.0424213	0.107983	0.0683865		20.603	0.133572		12.9747	0.0340992	0.848321			62	-0.166323	0.00245102	0.0297145		20.3138	0.124236		31.9481	0.156321
	62.5	0.134777	-0.166419	0.0808996		22.1239	0.105341		17.3913	0.167126	0.674108			62.5	0.00759599	0.0361577	0.0452455		20.4789	0.0921144		24.7012	0.0675705	-0.55918			62.5	0.0391757	0.0833165	0.0554039		20.7705	0.149374		13.0802	0.0399139	0.853798			62.5	-0.114392	-0.00793506	0.0764518		20.4789	0.140896		32.2078	0.163047
	63	0.119847	-0.164472	0.0783031		22.3009	0.110414		17.5316	0.174715	0.715068			63	-0.0144744	0.0303155	0.0458947		20.6441	0.0965353		24.9004	0.0680574	-0.512556			63	0.0378774	0.0638426	0.045667		20.938	0.159629		13.1857	0.0399139	0.853798			63	-0.0449355	-0.0105316	0.104364		20.6441	0.1488		32.4675	0.167717
	63.5	0.102321	-0.175507	0.0757065		22.4779	0.112758		17.6718	0.185932	0.77383			63.5	-0.0547205	0.022526	0.0419999		20.8092	0.099506		25.0996	0.0740618	-0.591656			63.5	0.0268422	0.0469652	0.0333335		21.1055	0.163945		13.2911	0.0528234	0.895349			63.5	0.0199775	-0.0105316	0.12968		20.8092	0.152948		32.7273	0.173361
	64	0.0919348	-0.215753	0.0724609		22.6549	0.121125		17.8121	0.197511	0.831851			64	-0.0904226	0.0199295	0.0264208		20.9744	0.105584		25.2988	0.0725688	-0.359233			64	0.00412266	0.0235966	0.0190526		21.273	0.170981		13.3966	0.059717	0.89891			64	0.0686623	-0.0150755	0.140067		20.9744	0.160593		32.987	0.17621
	64.5	0.0808996	-0.222893	0.0653205		22.8319	0.126298		17.9523	0.207515	0.882047			64.5	-0.113142	0.0244734	0.0101925		21.1396	0.110068		25.498	0.0773399	-0.388922			64.5	-0.0218425	-0.00431603	0.0028244		21.4405	0.176769		13.5021	0.0660986	0.898637			64.5	0.101119	-0.0248124	0.134874		21.1396	0.163448		33.2468	0.180375
	65	0.0789522	-0.174209	0.0614257		23.0088	0.12983		18.0926	0.213883	0.918991			65	-0.135213	0.0257716	-0.0112288		21.3047	0.114795		25.6972	0.0802286	-0.438376			65	-0.0497551	-0.0270356	-0.0108073		21.608	0.180809		13.6076	0.0728276	0.899795			65	0.130979	-0.0384442	0.125137		21.3047	0.170124		33.5065	0.182557
	65.5	0.0763557	-0.104752	0.0627239		23.1858	0.133379		18.2328	0.217357	0.930497			65.5	-0.149493	0.0264208	-0.0352466		21.4699	0.117707		25.8964	0.0845128	-0.519608			65.5	-0.0867555	-0.0374217	-0.0147021		21.7755	0.182687		13.7131	0.08208	0.941226			65.5	0.158891	-0.0449355	0.114101		21.4699	0.173197		33.7662	0.183603
	66	0.0698644	-0.032049	0.0620748		23.3628	0.135761		18.3731	0.221958	0.964911			66	-0.15923	0.022526	-0.0579661		21.635	0.11883		26.0956	0.0869471	-0.42845			66	-0.122458	-0.0536499	-0.0218425		21.943	0.182878		13.8186	0.0908844	0.907155			66	0.106961	-0.0559707	0.110856		21.635	0.173021		34.026	0.18564
	66.5	0.0601274	0.0341622	0.0562326		23.5398	0.137144		18.5133	0.227323	0.987829			66.5	-0.165722	0.0212277	-0.0741944		21.8002	0.122364		26.2948	0.0874015	-0.541506			66.5	-0.151669	-0.0750712	-0.0380708		22.1106	0.182573		13.9241	0.0908844	0.907155			66.5	0.0569779	-0.0728481	0.106312		21.8002	0.175546		34.2857	0.186884
	67	0.0516887	0.0873909	0.0400044		23.7168	0.139072		18.6536	0.228001	0.989069			67	-0.146897	0.0205786	-0.0878261		21.9653	0.124682		26.494	0.0907445	-0.578247			67	-0.176335	-0.0796151	-0.0659834		22.2781	0.181554		14.0295	0.103227	0.963952			67	0.0498375	-0.106603	0.102417		21.9653	0.17622		34.5455	0.188904
	67.5	0.0387061	0.119198	0.0198814		23.8938	0.139577		18.7938	0.229633	0.993244			67.5	-0.106651	0.0199295	-0.0995105		22.1305	0.125903		26.6932	0.0920427	-0.593789			67.5	-0.205546	-0.0361234	-0.0951942		22.4456	0.179526		14.135	0.113247	0.883458			67.5	0.0732062	-0.155937	0.101119		22.1305	0.175355		34.8052	0.188741
	68	0.0257235	0.123742	0.00624963		24.0708	0.139274		18.9341	0.229987	0.999855			68	-0.0540714	0.0160347	-0.116388		22.2956	0.126466		26.8924	0.0940875	-0.631227			68	-0.22502	-0.0478077	-0.134142		22.6131	0.177061		14.2405	0.114088	0.864173			68	0.0978731	-0.215657	0.0959257		22.2956	0.175085		35.0649	0.189138
	68.5	0.00754789	0.119198	-0.00608384		24.2478	0.13967		19.0743	0.229719	1			68.5	-0.00214096	0.0108416	-0.131318		22.4608	0.127389		27.0916	0.0948665	-0.743555			68.5	-0.223073	-0.0672816	-0.163353		22.7806	0.17493		14.346	0.120561	0.840349			68.5	0.108908	-0.272131	0.0842414		22.4608	0.173944		35.3247	0.188687
	69	-0.011926	0.113356	-0.0184173		24.4248	0.1383		19.2146	0.228459	0.996275			69	0.0329121	0.00954338	-0.11444		22.6259	0.127459		27.2908	0.0948989	-0.697632			69	-0.171142	-0.0452112	-0.178932		22.9481	0.171521		14.4515	0.122975	0.836822			69	0.104364	-0.307833	0.0706097		22.6259	0.172085		35.5844	0.188255
	69.5	-0.0437334	0.103619	-0.032049		24.6018	0.137824		19.3548	0.228412	0.994819			69.5	0.0517368	0.0101925	-0.0910718		22.7911	0.128206		27.49	0.0969761	-0.679266			69.5	-0.0912995	0.00152614	-0.142581		23.1156	0.168901		14.557	0.131149	0.814862			69.5	0.0946275	-0.292254	0.0608727		22.7911	0.17015		35.8442	0.187515
	70	-0.0696986	0.0938822	-0.0521721		24.7788	0.136255		19.4951	0.224574	0.987709			70	0.0660177	0.00370121	-0.140406		22.9562	0.128088		27.6892	0.0955805	-0.826917			70	-0.0607903	0.0521583	-0.127002		23.2831	0.16597		14.6624	0.13604	0.627927			70	0.0783992	-0.283166	0.0491884		22.9562	0.168049		36.1039	0.186217
	70.5	-0.0911199	0.0815487	-0.0722951		24.9558	0.135343		19.6353	0.2236	0.982458			70.5	0.0731581	-0.00408835	-0.185196		23.1214	0.127437		27.8884	0.0957103	-0.713883			70.5	-0.0231408	0.0852639	-0.13544		23.4506	0.164532		14.7679	0.138024	0.575235			70.5	0.0602236	-0.311728	0.0310127		23.1214	0.166337		36.3636	0.186001
	71	-0.11319	0.0672679	-0.0911199		25.1327	0.133346		19.7756	0.221624	0.981503			71	0.0764038	-0.0157727	-0.165073		23.2865	0.128304		28.0876	0.0961647	-0.797954			71	0.0411231	0.0982465	-0.109475		23.6181	0.161491		14.8734	0.139816	0.536266			71	0.0413988	-0.305886	0.0141354		23.2865	0.163302		36.6234	0.18445
	71.5	-0.12098	0.0516887	-0.104102		25.3097	0.131688		19.9158	0.218312	0.976702			71.5	0.0738072	-0.027457	-0.110546		23.4517	0.127254		28.2869	0.09412	-0.663725			71.5	0.10344	0.0937026	-0.0471586		23.7856	0.158693		14.9789	0.147103	0.407193			71.5	0.0284162	-0.234481	0.00180189		23.4517	0.160726		36.8831	0.18344
	72	-0.105401	0.0419518	-0.120331		25.4867	0.130225		20.0561	0.214961	0.9557			72	0.0744564	-0.0307027	-0.0436853		23.6168	0.126481		28.4861	0.0941849	-0.699753			72	0.144984	0.0833165	0.0138596		23.9531	0.156809		15.0844	0.147651	0.345105			72	0.0134862	-0.128673	-0.0118298		23.6168	0.158324		37.1429	0.180754
	72.5	-0.0852777	0.0361096	-0.136559		25.6637	0.128207		20.1964	0.212069	0.949159			72.5	0.0757546	-0.0300536	0.0160347		23.782	0.12625		28.6853	0.0946393	-0.847404			72.5	0.157966	0.0677374	0.060597		24.1206	0.154739		15.1899	0.148684	0.306289			72.5	0.00374928	-0.0248124	-0.0319529		23.782	0.156473		37.4026	0.178662
	73	-0.0826812	0.023127	-0.146296		25.8407	0.12577		20.3366	0.211	0.946224			73	0.0770529	-0.0268079	0.0582281		23.9472	0.124203		28.8845	0.0938928	-0.819146			73	0.158616	0.0534565	0.0911061		24.2881	0.150399		15.2954	0.150111	0.256639			73	-0.0137772	0.0680131	-0.0579181		23.9472	0.151184		37.6623	0.1752
	73.5	-0.0891725	0.00689876	-0.143699		26.0177	0.124486		20.4769	0.205463	0.917991			73.5	0.0738072	-0.0216149	0.108211		24.1123	0.12336		29.0837	0.0923998	-0.619909			73.5	0.152124	0.0424213	0.107334		24.4556	0.148613		15.4008	0.150111	0.256639			73.5	-0.032602	0.0563288	-0.0884272		24.1123	0.149111		37.9221	0.17163
	74	-0.107348	-0.00803123	-0.117734		26.1947	0.123088		20.6171	0.203306	0.909875			74	0.0660177	-0.0183692	0.140019		24.2775	0.122394		29.2829	0.0932436	-0.542899			74	0.141738	0.0320352	0.113826		24.6231	0.146361		15.5063	0.152424	0.155648			74	-0.0514268	0.012188	-0.109848		24.2775	0.14705		38.1818	0.167861
	74.5	-0.124875	-0.0229612	-0.071646		26.3717	0.119466		20.7574	0.199115	0.894143			74.5	0.0595264	-0.0404396	0.0997725		24.4426	0.119557		29.4821	0.0908418	-0.643242			74.5	0.130054	0.0203509	0.115773		24.7906	0.140635		15.6118	0.152424	0.155648			74.5	-0.0767428	0.00180189	-0.122831		24.4426	0.141591		38.4416	0.163029
	75	-0.124875	-0.0443825	0.00300398		26.5487	0.117191		20.8976	0.193063	0.873691			75	0.0517368	-0.0664048	0.0692633		24.6078	0.117666		29.6813	0.0908743	-0.860829			75	0.120317	0.00412266	0.114475		24.9581	0.136368		15.7173	0.151985	0.0842508			75	-0.109199	0.0147845	-0.120884		24.6078	0.136815		38.7013	0.152967
	75.5	-0.0989094	-0.0774881	0.0555835		26.7257	0.117191		21.0379	0.193063	0.873691			75.5	0.0458947	-0.0858787	0.0751055		24.7729	0.117666		29.8805	0.0908743	-0.860829			75.5	0.111229	-0.0127547	0.113826		25.1256	0.136368		15.8228	0.151985	0.0842508			75.5	-0.1462	0.0388023	-0.102059		24.7729	0.136815		38.961	0.148964
	76	-0.0573651	-0.137208	0.0348113		26.9027	0.113626		21.1781	0.186256	0.841017			76	0.0381051	-0.0839313	0.0991233		24.9381	0.114199		30.0797	0.0891866	-1			76	0.0995448	-0.0374217	0.107983		25.2931	0.1308		15.9283	0.151592	0.0769507			76	-0.190341	0.0680131	-0.0689533		24.9381	0.131324		39.2208	0.143158
	76.5	-0.00932949	-0.215104	0.00495137		27.0796	0.111561		21.3184	0.185932	0.840682			76.5	0.0283681	-0.0683522	0.117299		25.1032	0.112566		30.2789	0.0869146	-0.73861			76.5	0.0865622	-0.0607903	0.10279		25.4606	0.128702		16.0338	0.149425	-0.0666959			76.5	-0.233832	0.0991714	-0.000145503		25.1032	0.128807		39.4805	0.138055
	77	0.0302674	-0.27028	-0.00543471		27.2566	0.11038		21.4586	0.179784	0.812229			77	0.00954338	-0.0495275	0.121843		25.2684	0.112024		30.4781	0.0861681	-0.540112			77	0.0729304	-0.0822116	0.0988956		25.6281	0.126846		16.1392	0.149425	-0.0666959			77	-0.270833	0.123189	0.0264688		25.2684	0.126531		39.7403	0.132141
	77.5	0.0588292	-0.278069	0.0056005		27.4336	0.106426		21.5989	0.179011	0.812064			77.5	-0.00603574	-0.0352466	0.121194		25.4335	0.108864		30.6773	0.0839286	-0.603671			77.5	0.0612461	-0.093896	0.0872113		25.7956	0.12194		16.2447	0.146993	-0.135172			77.5	-0.28057	0.136172	-0.0111807		25.4335	0.121362		40	0.12693
	78	0.0698644	-0.211858	0.0244253		27.6106	0.104421		21.7391	0.173054	0.792612			78	-0.0144744	-0.0216149	0.106264		25.5987	0.105713		30.8765	0.0830847	-0.66443			78	0.0528074	-0.100387	0.0742287		25.9631	0.119488		16.3502	0.146225	-0.142412			78	-0.251359	0.142014	-0.027409		25.5987	0.1191		40.2597	0.121394
	78.5	0.0796013	-0.152787	0.0374079		27.7876	0.102121		21.8794	0.171575	0.785596			78.5	-0.0307027	-0.00279009	0.092632		25.7638	0.104626		31.0757	0.0811049	-0.708938			78.5	0.0463161	-0.101686	0.0580005		26.1307	0.116614		16.4557	0.144003	-0.161305			78.5	-0.148147	0.156295	-0.00404028		25.7638	0.11609		40.5195	0.117554
	79	0.0899874	-0.137857	0.0413027		27.9646	0.0988077		22.0196	0.166601	0.767979			79	-0.0436853	0.0134382	0.0796494		25.929	0.102103		31.2749	0.079125	-0.6722			79	0.0417722	-0.0796151	0.0443687		26.2982	0.113353		16.5612	0.141306	-0.234315			79	-0.0877781	0.164734	0.0355566		25.929	0.113164		40.7792	0.11182
	79.5	0.0945313	-0.11319	0.0413027		28.1416	0.0966016		22.1599	0.164119	0.756883			79.5	-0.0534222	0.0283681	0.067316		26.0941	0.0988894		31.4741	0.0779242	-0.756271			79.5	0.0437196	-0.0374217	0.0287896		26.4657	0.109882		16.6667	0.139889	-0.25853			79.5	-0.0702515	0.158891	0.0712588		26.0941	0.109801		41.039	0.107456
	80	0.097777	-0.0528212	0.0419518		28.3186	0.0934331		22.3001	0.159298	0.731485			80	-0.0631592	0.0296664	0.0562807		26.2593	0.0960709		31.6733	0.0751329	-0.555654			80	0.0469652	-0.054299	0.0216492		26.6332	0.105997		16.7722	0.136744	-0.252415			80	-0.0267598	0.143961	0.0926801		26.2593	0.106059		41.2987	0.10156
	80.5	0.0958296	0.017934	0.0419518		28.4956	0.091919		22.4404	0.156034	0.713683			80.5	-0.0767909	0.0309647	0.0517368		26.4244	0.0943134		31.8725	0.0741917	-0.537283			80.5	0.0365792	-0.0672816	0.0151579		26.8007	0.103887		16.8776	0.133553	-0.284995			80.5	0.0362058	0.127084	0.106312		26.4244	0.103826		41.5584	0.0989271
	81	0.0912857	0.0783031	0.0419518		28.6726	0.0896072		22.5806	0.153523	0.699766			81	-0.10016	0.0394034	0.0394034		26.5896	0.0913636		32.0717	0.0717899	-0.436939			81	0.0132105	-0.0309304	0.0028244		26.9682	0.100578		16.9831	0.129796	-0.324603			81	0.102417	0.125786	0.106312		26.5896	0.100298		41.8182	0.0934636
	81.5	0.0776539	0.102321	0.038057		28.8496	0.08657		22.7209	0.149409	0.674633			81.5	-0.131318	0.0536842	0.0238242		26.7547	0.088765		32.2709	0.0703293	-0.390315			81.5	-0.0160004	0.0274913	-0.0127547		27.1357	0.096162		17.0886	0.128388	-0.332817			81.5	0.140716	0.12968	0.101768		26.7547	0.0967147		42.0779	0.0893344
	82	0.0575309	0.106865	0.0296183		29.0265	0.0844938		22.8612	0.146048	0.664442			82	-0.154037	0.0647194	0.0147364		26.9199	0.0858361		32.4701	0.0673109	-0.444732			82	-0.043913	0.0722813	-0.0309304		27.3032	0.0929389		17.1941	0.12367	-0.413279			82	0.157593	0.130979	0.0907327		26.9199	0.0932556		42.3377	0.0865756
	82.5	0.0451974	0.10297	0.0205305		29.2035	0.0814091		23.0014	0.142135	0.654656			82.5	-0.156634	0.0666668	0.00824512		27.0851	0.0830888		32.6693	0.0662723	-0.469458			82.5	-0.0874047	0.0937026	-0.0549482		27.4707	0.0891202		17.2996	0.121247	-0.454651			82.5	0.151751	0.121891	0.0816449		27.0851	0.0894153		42.5974	0.0817432
	83	0.0354605	0.106216	0.0107935		29.3805	0.0786602		23.1417	0.136989	0.633869			83	-0.143651	0.0562807	0.000455561		27.2502	0.0809178		32.8685	0.0637082	-0.587433			83	-0.136089	0.0917552	-0.0698782		27.6382	0.0851814		17.4051	0.116877	-0.470652			83	0.139417	0.119294	0.0667149		27.2502	0.0866255		42.8571	0.0790746
	83.5	0.0335131	0.104917	0.0056005		29.5575	0.0766295		23.2819	0.133104	0.626968			83.5	-0.120283	0.0432981	-0.0131762		27.4154	0.078004		33.0677	0.0614038	-0.525268			83.5	-0.18023	0.0813691	-0.0744221		27.8057	0.0821194		17.5105	0.109737	-0.523341			83.5	0.129031	0.10761	0.0582762		27.4154	0.0829907		43.1169	0.0740258
	84	0.0341622	0.102321	-0.00153993		29.7345	0.0732329		23.4222	0.125715	0.607206			84	-0.10016	0.0335612	-0.042387		27.5805	0.0753877		33.2669	0.0610468	-0.475118			84	-0.212687	0.0690357	-0.0679308		27.9732	0.0783924		17.616	0.109161	-0.522793			84	0.125137	0.0913818	0.0491884		27.5805	0.0785001		43.3766	0.0702752
	84.5	0.0244253	0.0971278	-0.00283819		29.9115	0.0706038		23.5624	0.122174	0.594674			84.5	-0.0728961	0.0342103	-0.072247		27.7457	0.0729019		33.4661	0.0588722	-0.246917			84.5	-0.222424	0.0573513	-0.0653343		28.1407	0.0741148		17.7215	0.102953	-0.579041			84.5	0.112803	0.0777501	0.0394514		27.7457	0.0752204		43.6364	0.0668673
	85	0.0133901	0.082847	0.000407458		30.0885	0.0673292		23.7027	0.117601	0.573457			85	-0.0300536	0.0303155	-0.0910718		27.9108	0.069119		33.6653	0.0570546	-0.180486			85	-0.213336	0.0372283	-0.0620886		28.3082	0.071069		17.827	0.0952728	-0.648703			85	0.0959257	0.067364	0.0316619		27.9108	0.0710164		43.8961	0.0620169
	85.5	0.00235485	0.0666187	0.00365311		30.2655	0.0650092		23.8429	0.113401	0.561906			85.5	0.0192803	0.0270699	-0.0949666		28.076	0.0666213		33.8645	0.0566002	-0.0293391			85.5	-0.190616	0.0119122	-0.0607903		28.4757	0.067208		17.9325	0.0928135	-0.666438			85.5	0.0783992	0.0576271	0.0238723		28.076	0.066159		44.1558	0.0578696
	86	-0.00218906	0.052987	0.00430224		30.4425	0.0615952		23.9832	0.104791	0.523216			86	0.0640703	0.0134382	-0.0982122		28.2411	0.0632362		34.0637	0.05488	-0.0265095			86	-0.154914	-0.0237899	-0.0757203		28.6432	0.0622711		18.038	0.086825	-0.690593			86	0.0602236	0.0485392	0.00569667		28.2411	0.0624298		44.4156	0.0528389
	86.5	-0.00868036	0.0451974	-0.00283819		30.6195	0.0569151		24.1234	0.100409	0.505719			86.5	0.103018	-0.00473748	-0.1073		28.4063	0.0581415		34.2629	0.0518616	-0.0893712			86.5	-0.0951942	-0.0646851	-0.101686		28.8107	0.0575129		18.1435	0.0824182	-0.705072			86.5	0.052434	0.0349075	-0.0280581		28.4063	0.0572421		44.6753	0.0489621
	87	-0.0190664	0.0387061	-0.0197156		30.7965	0.0543671		24.2637	0.094729	0.485697			87	0.124439	-0.012527	-0.118984		28.5714	0.0564682		34.4622	0.0502388	-0.258932			87	-0.104282	-0.103633	-0.123107		28.9782	0.055196		18.2489	0.0730287	-0.710944			87	0.0401006	0.027118	-0.0598655		28.5714	0.0544412		44.9351	0.04312
	87.5	-0.0359438	0.0302674	-0.0288034		30.9735	0.0489105		24.4039	0.0827392	0.429251			87.5	0.135475	-0.0105797	-0.13002		28.7366	0.0498604		34.6614	0.0485835	-0.00104262			87.5	-0.1283	-0.1283	-0.132195		29.1457	0.046722		18.3544	0.067598	-0.711066			87.5	0.0284162	0.0167319	-0.0936202		28.7366	0.0473607		45.1948	0.0368811
	88	-0.0664529	0.0192322	-0.0229612		31.1504	0.0460528		24.5442	0.0725536	0.386051			88	0.140668	-0.007334	-0.128721		28.9017	0.0459142		34.8606	0.0471879	0.021551			88	-0.104931	-0.129598	-0.11337		29.3132	0.0421727		18.4599	0.0673968	-0.697893			88	0.0232232	0.0108897	-0.113743		28.9017	0.0431279		45.4545	0.0326798
	88.5	-0.104752	-0.00024167	-0.0112769		31.3274	0.0418184		24.6844	0.0655086	0.357503			88.5	0.140019	-0.00928139	-0.123528		29.0669	0.0439974		35.0598	0.0455001	0.129644			88.5	-0.0393691	-0.110773	-0.0737729		29.4807	0.0381954		18.5654	0.0601193	-0.726002			88.5	0.0154336	0.00115276	-0.12348		29.0669	0.0393942		45.7143	0.028208
	89	-0.134612	-0.0281543	-0.000890802		31.5044	0.0377863		24.8247	0.058855	0.328479			89	0.132229	-0.0196675	-0.11509		29.232	0.0388367		35.259	0.0445913	-0.117624			89	0.0398248	-0.0867555	-0.0231408		29.6482	0.0322728		18.6709	0.0551822	-0.754323			89	-0.00468941	-0.00598767	-0.129322		29.232	0.0344004		45.974	0.0225101
	89.5	-0.138506	-0.0612599	0.0153375		31.6814	0.0322148		24.9649	0.0486408	0.294946			89.5	0.121194	-0.0261588	-0.0930192		29.3972	0.0332436		35.4582	0.0419299	-0.169907			89.5	0.107983	-0.0737729	0.0287896		29.8157	0.0242141		18.7764	0.0451527	-0.79095			89.5	-0.0248124	-0.00728593	-0.137112		29.3972	0.0267119		46.2338	0.0167581
	90	-0.120331	-0.113839	0.0542853		31.8584	0.0268965		25.1052	0.0299114	0.223628			90	0.109509	-0.0320009	-0.0300536		29.5623	0.0297363		35.6574	0.0422869	-0.17696			90	0.141738	-0.0666325	0.0716322		29.9832	0.0163228		18.8819	0.0390454	-0.789216			90	-0.0520759	-0.00728593	-0.118287		29.5623	0.0206434		46.4935	0.00956355
	90.5	-0.102804	-0.19563	0.0400044		32.0354	0.0250697		25.2454	0.0217973	0.194774			90.5	0.0991233	-0.0345975	0.0316138		29.7275	0.0262926		35.8566	0.0400474	-0.230679			90.5	0.146282	-0.0504043	0.100194		30.1508	0.0129296		18.9873	0.030817	-0.849479			90.5	-0.0709007	-0.0150755	-0.128673		29.7275	0.0167759		46.7532	0.00469508
	91	-0.0839794	-0.284561	0.00754789		32.2124	0.0193369		25.3857	0.0143037	0.164271			91	0.0952285	-0.0339483	0.0134382		29.8927	0.0209882		36.0558	0.0371912	-0.0547624			91	0.135896	-0.0231408	0.11058		30.3183	0.00420359		19.0928	0.0272696	-0.848049			91	-0.0903746	-0.0235142	-0.19813		29.8927	0.00814657		47.013	-0.00255354
	91.5	-0.0599616	-0.335193	0.00819702		32.3894	0.0150063		25.5259	-0.0066403	0.0728807			91.5	0.0997725	-0.0404396	-0.0138253		30.0578	0.0179032		36.255	0.0360228	0.0922052			91.5	0.122913	0.010614	0.105387		30.4858	-0.00426724		19.1983	0.0209886	-0.84519			91.5	-0.110498	-0.0371459	-0.227341		30.0578	0.00220239		47.2727	-0.00792689
	92	-0.0301017	-0.314421	0.0205305		32.5664	0.0100613		25.6662	-0.0233936	0.00822343			92	0.0997725	-0.0449835	-0.0138253		30.223	0.0128262		36.4542	0.0342702	0.184756			92	0.112527	0.03593	0.0995448		30.6533	-0.0100084		19.3038	0.0165635	-0.827394			92	-0.131919	-0.0488303	-0.177358		30.223	-0.00449222		47.5325	-0.0174475
	92.5	0.00105659	-0.252104	0.0341622		32.7434	0.00649043		25.8065	-0.0311163	-0.0244768			92.5	0.087439	-0.0456327	0.0056486		30.3881	0.00806277		36.6534	0.0309271	0.107746			92.5	0.105387	0.0592987	0.0988956		30.8208	-0.0182893		19.4093	0.00749401	-0.901741			92.5	-0.151393	-0.0644094	-0.0741463		30.3881	-0.0133281		47.7922	-0.0238847
	93	0.032864	-0.224192	0.0458466		32.9204	0.0029787		25.9467	-0.0511153	-0.0997082			93	0.0712107	-0.0384922	0.0238242		30.5533	0.005653		36.8526	0.0281359	0.264553			93	0.0975974	0.0729304	0.101492		30.9883	-0.0254376		19.5148	-0.00277322	-0.944208			93	-0.173463	-0.0819359	0.0550306		30.5533	-0.0189402		48.0519	-0.0337298
	93.5	0.0555835	-0.170314	0.0510396		33.0973	0.00037566		26.087	-0.067038	-0.171502			93.5	0.0517368	-0.0287553	0.037456		30.7184	0.00115435		37.0518	0.0243709	0.193202			93.5	0.09565	0.0787726	0.100843		31.1558	-0.0312538		19.6203	-0.013013	-0.977671			93.5	-0.185797	-0.120235	0.117347		30.7184	-0.0242637		48.3117	-0.0412309
	94	0.0750574	-0.0761899	0.0503905		33.2743	-0.00568124		26.2272	-0.0808416	-0.231339			94	0.0381051	-0.012527	0.0471929		30.8836	-0.00496405		37.251	0.0233323	0.0074028			94	0.090457	0.0820183	0.0969483		31.3233	-0.0416891		19.7257	-0.0161215	-0.966568			94	-0.152691	-0.171516	0.0900836		30.8836	-0.0377649		48.5714	-0.0520858
	94.5	0.0841452	0.0257235	0.0490922		33.4513	-0.0106273		26.3675	-0.0949411	-0.293753			94.5	0.0303155	-0.00538661	0.0530351		31.0487	-0.00892749		37.4502	0.0193726	0.173438			94.5	0.0852639	0.0768252	0.0917552		31.4908	-0.0518097		19.8312	-0.0182061	-0.983268			94.5	-0.144252	-0.217604	0.0641184		31.0487	-0.0446607		48.8312	-0.0657896
	95	0.0789522	0.101672	0.0393553		33.6283	-0.0136882		26.5077	-0.119465	-0.399105			95	0.0199295	0.000455561	0.0562807		31.2139	-0.0114928		37.6494	0.0175226	0.155763			95	0.0794217	0.0644917	0.0794217		31.6583	-0.0572477		19.9367	-0.0278607	-0.985033			95	-0.12348	-0.253306	0.0693114		31.2139	-0.0507541		49.0909	-0.0765363
	95.5	0.0698644	0.146462	0.032864		33.8053	-0.0207075		26.648	-0.121336	-0.40944			95.5	0.00499947	0.00824512	0.0556316		31.379	-0.0182478		37.8486	0.0169708	0.316139			95.5	0.0716322	0.0469652	0.0690357		31.8258	-0.0683231		20.0422	-0.0414742	-1			95.5	-0.0540233	-0.274728	0.0978731		31.379	-0.0657116		49.3506	-0.0995264
	96	0.0607766	0.167234	0.023127		33.9823	-0.0270294		26.7882	-0.135264	-0.46541			96	-0.0157727	0.00759599	0.0504386		31.5442	-0.0237306		38.0478	0.0147638	0.401638			96	0.0631935	0.0313861	0.0586496		31.9933	-0.0803875		20.1477	-0.0508728	-0.997871			96	0.0316619	-0.277324	0.120593		31.5442	-0.0730099		49.6104	-0.108939
	96.5	0.0549344	0.163988	0.0101444		34.1593	-0.0311677		26.9285	-0.162537	-0.570834			96.5	-0.0391414	0.00824512	0.0478421		31.7093	-0.0270225		38.247	0.0128164	0.580341			96.5	0.0482635	0.0164561	0.0430705		32.1608	-0.0809868		20.2532	-0.0508728	-0.997871			96.5	0.0933292	-0.261745	0.132277		31.7093	-0.074362		49.8701	-0.142856
	97	0.0510396	0.152304	-0.00673297		34.3363	-0.0406538		27.0687	-0.174622	-0.621028			97	-0.0638083	0.00499947	0.0394034		31.8745	-0.0374611		38.4462	0.00843479	0.603675			97	0.0352809	-0.00496516	0.0274913		32.3283	-0.0954727		20.3586	-0.0508728	-0.997871			97	0.120593	-0.208516	0.132926		31.8745	-0.0925786		50.1299	-0.148157
	97.5	0.0510396	0.138023	-0.021663		34.5133	-0.05326		27.209	-0.174622	-0.621028			97.5	-0.0787383	-0.007334	0.0355086		32.0396	-0.048384		38.6454	0.00359877	0.51748			97.5	0.0300879	-0.0335269	0.0229474		32.4958	-0.108156		20.4641	-0.0604727	-0.943874			97.5	0.12968	-0.151393	0.125137		32.0396	-0.101013		50.3896	-0.185013
	98	0.0516887	0.130883	-0.032049		34.6903	-0.0535016		27.3492	-0.187919	-0.671413			98	-0.0878261	-0.0164218	0.0335612		32.2048	-0.048384		38.8446	-0.00483992	0.470159			98	0.0268422	-0.0633869	0.0235966		32.6633	-0.108156		20.5696	-0.0790689	-0.80975			98	0.135523	-0.151393	0.114751		32.2048	-0.101013		50.6494	-0.188637
	98.5	0.0477939	0.123093	-0.0378912		34.8673	-0.062464		27.4895	-0.22827	-0.842234			98.5	-0.103405	0.022526	0.0283681		32.3699	-0.0609078		39.0438	-0.00779346	0.39032			98.5	0.0229474	-0.099089	0.0177544		32.8308	-0.122357		20.6751	-0.0790689	-0.80975			98.5	0.138768	-0.130621	0.105663		32.3699	-0.117751		50.9091	-0.220968
	99	0.0510396	0.111409	-0.0443825		35.0442	-0.0770569		27.6297	-0.22827	-0.842234			99	-0.126125	0.00954338	0.027719		32.5351	-0.0719227		39.243	-0.0231129	0.829046			99	0.0151579	-0.126352	-0.000421253		32.9983	-0.138791		20.7806	-0.0790689	-0.80975			99	0.140716	-0.0793394	0.0985223		32.5351	-0.130018		51.1688	-0.229515
	99.5	0.0770048	0.0997243	-0.0573651		35.2212	-0.0770569		27.77	-0.22827	-0.842234			99.5	-0.157932	-0.0332992	0.0283681		32.7002	-0.0719227		39.4422	-0.0231129	0.829046			99.5	0.00801744	-0.143879	-0.0218425		33.1658	-0.138791		20.8861	-0.0790689	-0.80975			99.5	0.132277	-0.0267598	0.0933292		32.7002	-0.130018		51.4286	-0.262674
	100	0.103619	0.0971278	-0.0690495										100	-0.178704	-0.0430362	0.0238242										100	0.0028244	-0.149072	-0.0465095										100	0.121891	0.00504754	0.0848905
	100.5	0.0932331	0.0958296	-0.0839794										100.5	-0.185196	-0.0203166	0.0186312										100.5	0.000877007	-0.144528	-0.0711764										100.5	0.108908	0.037504	0.0738553
	101	0.0484431	0.0919348	-0.0950147										101	-0.173511	0.0101925	0.00175382										101	-0.00236864	-0.127651	-0.099089										101	0.10047	0.0712588	0.0569779
	101.5	-0.00413645	0.082847	-0.0956638										101.5	-0.142353	0.0218769	-0.0131762										101.5	-0.0237899	-0.0958434	-0.129598										101.5	0.0978731	0.0965749	0.0362058
	102	-0.0495756	0.0659696	-0.0878742										102	-0.106002	0.022526	-0.0268079										102	-0.0549482	-0.049106	-0.165949										102	0.0946275	0.116049	0.0193284
	102.5	-0.0774881	0.0458466	-0.0735934										102.5	-0.0631592	0.022526	-0.0410888										102.5	-0.0997381	0.0093157	-0.201652										102.5	0.0848905	0.128382	0.00310015
	103	-0.0924181	0.0218287	-0.0515229										103	-0.0209657	0.0186312	-0.0618609										103	-0.142581	0.0995448	-0.196459										103	0.0758027	0.134874	-0.00728593
	103.5	-0.119032	-0.0132243	-0.0294525										103.5	0.0238242	0.0147364	-0.0767909										103.5	-0.177634	0.128106	-0.171142										103.5	0.0595745	0.136821	-0.0137772
	104	-0.151489	-0.0709968	0.00235485										104	0.0601755	0.012789	-0.081984										104	-0.198406	0.090457	-0.186072										104	0.0485392	0.134224	-0.0241633
	104.5	-0.167068	-0.149542	0.0276709										104.5	0.0796494	0.0160347	-0.0793874										104.5	-0.200353	0.0625444	-0.173739										104.5	0.0388023	0.133575	-0.0553216
	105	-0.148892	-0.223542	0.0413027										105	0.087439	0.0212277	-0.0793874										105	-0.169195	0.060597	-0.108826										105	0.0277671	0.131628	-0.0890763
	105.5	-0.0976112	-0.268982	0.0542853										105.5	0.0828951	0.0238242	-0.0845805										105.5	-0.0912995	0.0670883	-0.0237899										105.5	0.012188	0.132277	-0.119585
	106	-0.0495756	-0.252753	0.0666187										106	0.072509	0.0316138	-0.0865279										106	-0.0698782	0.0618952	0.0495618										106	-0.00858419	0.131628	-0.142954
	106.5	-0.0709968	-0.237823	0.0808996										106.5	0.0686142	0.0355086	-0.0735453										106.5	-0.0646851	0.0424213	0.100843										106.5	-0.0339003	0.13033	-0.149445
	107	-0.0891725	-0.257297	0.0932331										107	0.0634212	0.0407016	-0.0462818										107	-0.0257373	0.021	0.1333										107	-0.0553216	0.12968	-0.139059
	107.5	-0.0755408	-0.238472	0.097777										107.5	0.057579	0.042649	-0.0118779										107.5	0.0346318	0.00347353	0.156019										107.5	-0.067655	0.12254	-0.129322
	108	-0.0359438	-0.168366	0.100373										108	0.0543334	0.0394034	0.0251225										108	0.0878604	-0.0179478	0.167054										108	-0.077392	0.113452	-0.131919
	108.5	0.00819702	-0.0573651	0.097777										108.5	0.052386	0.0394034	0.0517368										108.5	0.113177	-0.0523517	0.1703										108.5	-0.0962167	0.105663	-0.125428
	109	0.0516887	0.0471448	0.0893383										109	0.0562807	0.0432981	0.0634212										109	0.119019	-0.0964925	0.169651										109	-0.124778	0.10047	-0.0981641
	109.5	0.0808996	0.121795	0.0789522										109.5	0.0666668	0.0432981	0.0647194										109.5	0.119019	-0.130247	0.164458										109.5	-0.150095	0.0965749	-0.0267598
	110	0.104917	0.163988	0.0614257										110	0.0699125	0.0381051	0.0679651										110	0.109282	-0.139335	0.153423										110	-0.152042	0.0933292	-0.0319529
	110.5	0.119847	0.17762	0.0490922										110.5	0.0666668	0.0348595	0.0686142										110.5	0.0988956	-0.128949	0.139142										110.5	-0.144902	0.0855397	-0.0540233
	111	0.12569	0.178269	0.0335131										111	0.0543334	0.0303155	0.0660177										111	0.0885096	-0.0932468	0.120317										111	-0.148796	0.0758027	-0.0345494
	111.5	0.121795	0.173725	0.0224779										111.5	0.0387542	0.0218769	0.0601755										111.5	0.0768252	-0.0257373	0.107334										111.5	-0.163726	0.0602236	0.0212758
	112	0.11076	0.165936	0.0172848										112	0.0186312	0.0121399	0.0536842										112	0.0631935	-0.0276847	0.0924043										112	-0.157884	0.042048	0.0745045
	112.5	0.0984261	0.152953	0.0159866										112.5	0.00435034	0.00175382	0.0484912										112.5	0.0541057	-0.049106	0.0813691										112.5	-0.114392	0.0297145	0.111505
	113	0.08804	0.143865	0.0153375										113	-0.00214096	-0.00538661	0.042649										113	0.0489126	-0.0335269	0.0716322										113	-0.0358477	0.0277671	0.132926
	113.5	0.0711626	0.13997	0.0114427										113.5	-0.00668487	-0.0131762	0.0439473										113.5	0.0437196	0.00996483	0.0612461										113.5	0.047241	0.0290654	0.136821
	114	0.0562326	0.136076	0.00624963										114	-0.0151236	-0.0255096	0.0445964										114	0.0365792	0.0489126	0.0495618										114	0.0498375	0.0303636	0.13747
	114.5	0.0464957	0.12504	-0.00868036										114.5	-0.0326501	-0.0397905	0.0471929										114.5	0.0261931	0.075527	0.0378774										114.5	0.0433462	0.0251706	0.133575
	115	0.0451974	0.112707	-0.0275051										115	-0.0475801	-0.0443344	0.0381051										115	0.0093157	0.0885096	0.0274913										115	0.0641184	0.0232232	0.123838
	115.5	0.0354605	0.0932331	-0.0450316										115.5	-0.0618609	-0.0410888	0.0186312										115.5	-0.00171951	0.09565	0.0145087										115.5	0.101768	0.0160828	0.108908
	116	0.0302674	0.0705135	-0.0599616										116	-0.07744	-0.0417379	-0.00408835										116	-0.014053	0.10279	-0.00431603										116	0.138119	0.00764406	0.0933292
	116.5	0.0283201	0.0477939	-0.071646										116.5	-0.0806857	-0.0488783	-0.0235623										116.5	-0.0348251	0.112527	-0.0160004										116.5	0.154997	-0.000794631	0.0803466
	117	0.0146883	0.0263727	-0.0898216										117	-0.037194	-0.0586153	-0.0300536										117	-0.0562464	0.109282	-0.0283338										117	0.155646	-0.0111807	0.0745045
	117.5	-0.00478558	-0.0073821	-0.109296										117.5	-0.052124	-0.0677031	-0.0177201										117.5	-0.0770186	0.0930535	-0.0374217										117.5	0.147207	-0.0228651	0.0634692
	118	-0.0242595	-0.0664529	-0.086576										118	-0.112493	-0.0813348	-0.0800366										118	-0.104931	0.0683865	-0.049106										118	0.129031	-0.0345494	0.0491884
	118.5	-0.0476282	-0.159279	-0.0703477										118.5	-0.138458	-0.0891244	-0.150792										118.5	-0.141932	0.0378774	-0.0711764										118.5	0.108259	-0.0410407	0.0362058
	119	-0.0684003	-0.261192	-0.0943655										119	-0.110546	-0.0878261	-0.150143										119	-0.182178	0.00412266	-0.106879										119	0.0887853	-0.0501285	0.0342584
	119.5	-0.0787864	-0.320263	-0.104752										119.5	-0.0618609	-0.0644574	-0.107949										119.5	-0.216582	-0.0224917	-0.141282										119.5	0.0725571	-0.0579181	0.0310127
	120	-0.0826812	-0.319614	-0.0761899										120	-0.0190183	0.00759599	-0.0605627										120	-0.247091	-0.0445621	-0.147774										120	0.0589253	-0.0760937	0.0264688
	120.5	-0.0846286	-0.261841	-0.0301017										120.5	0.0147364	0.0173329	-0.0332992										120.5	-0.226968	-0.0672816	-0.0932468										120.5	0.0517849	-0.102059	0.0160828
	121	-0.0924181	-0.189139	0.0192322										121	0.0316138	-0.0190183	-0.0229131										121	-0.203599	-0.084159	-0.0354743										121	0.0465919	-0.135814	-0.00468941
	121.5	-0.108646	-0.179402	0.0497413										121.5	0.0407016	-0.0332992	-0.0242114										121.5	-0.201002	-0.084159	-0.0484569										121.5	0.0433462	-0.170867	-0.0293564
	122	-0.131366	-0.158629	0.0685661										122	0.0543334	-0.00863226	-0.0229131										122	-0.131546	-0.0796151	-0.0594921										122	0.0362058	-0.196832	-0.0436372
	122.5	-0.149542	-0.0989094	0.0796013										122.5	0.0731581	0.0212277	-0.0229131										122.5	-0.0114565	-0.058843	-0.0302812										122.5	0.0180301	-0.213709	-0.0533742
	123	-0.150191	-0.0125751	0.0841452										123	0.0913338	0.0400525	-0.017071										123	0.10344	-0.0296321	0.0255439										123	-0.00209289	-0.195534	-0.0657076
	123.5	-0.11319	0.0737592	0.0919348										123.5	0.0965268	0.0419999	-0.000193571										123.5	0.169002	0.000877007	0.0794217										123.5	-0.0209177	-0.215657	-0.0838833
	124	-0.0502247	0.131532	0.0971278										124	0.0945794	0.0355086	0.0270699										124	0.190423	0.0261931	0.120966										124	-0.0339003	-0.298096	-0.114392
	124.5	0.00949528	0.163988	0.0945313										124.5	0.0867898	0.0231751	0.0484912										124.5	0.17809	0.0450179	0.141089										124.5	-0.0436372	-0.334447	-0.146849
	125	0.0426009	0.17762	0.0873909										125	0.0809477	0.00889425	0.0621229										125	0.157317	0.0528074	0.144335										125	-0.0689533	-0.297447	-0.134515
	125.5	0.0426009	0.182164	0.0854435										125.5	0.0718599	-0.00343922	0.0699125										125.5	0.135896	0.0547548	0.139791										125.5	-0.103357	-0.211113	-0.172814
	126	0.0400044	0.174374	0.0873909										126	0.0562807	-0.0151236	0.0751055										126	0.123563	0.0560531	0.128756										126	-0.139059	-0.0793394	-0.239025
	126.5	0.0451974	0.160743	0.08804										126.5	0.0445964	-0.0229131	0.0783512										126.5	0.117071	0.0567022	0.115773										126.5	-0.182551	0.0128371	-0.253306
	127	0.0588292	0.149058	0.0834961										127	0.0296664	-0.0345975	0.0731581										127	0.11058	0.0541057	0.109282										127	-0.218902	0.0206267	-0.212411
	127.5	0.0718118	0.134777	0.0757065										127.5	0.0160347	-0.0378431	0.0660177										127.5	0.0995448	0.045667	0.0988956										127.5	-0.225394	0.0238723	-0.146849
	128	0.0744083	0.124391	0.067917										128	0.0056486	-0.042387	0.0634212										128	0.0872113	0.0424213	0.0911061										128	-0.157235	0.0543814	-0.0864798
	128.5	0.0744083	0.115303	0.0594783										128.5	-0.00214096	-0.0475801	0.062772										128.5	0.0794217	0.0450179	0.0787726										128.5	-0.119585	0.0803466	-0.0358477
	129	0.0750574	0.105567	0.0464957										129	-0.0144744	-0.0508257	0.0439473										129	0.0761761	0.0515091	0.0664391										129	-0.130621	0.0933292	0.0102406
	129.5	0.0750574	0.0932331	0.0348113										129.5	-0.0248605	-0.0527731	0.0192803										129.5	0.0729304	0.0554039	0.0482635										129.5	-0.109199	0.0991714	0.0550306
	130	0.0724609	0.0737592	0.0250744										130	-0.0320009	-0.0462818	-0.000193571										130	0.0638426	0.0495618	0.0294387										130	-0.0442863	0.110207	0.0952766
	130.5	0.0627239	0.0510396	0.017934										130.5	-0.0345975	-0.0261588	-0.0138253										130.5	0.0450179	0.0365792	0.00736831										130.5	0.0290654	0.125786	0.116049
	131	0.0568818	0.023127	0.00105659										131	-0.0326501	-0.00473748	-0.0255096										131	0.0242457	0.00996483	-0.0185969										131	0.0868379	0.14526	0.117347
	131.5	0.0542853	-0.0223121	-0.0236104										131.5	-0.037194	0.0497894	-0.0495275										131.5	0.00477179	-0.0218425	-0.0380708										131.5	0.118645	0.151102	0.112803
	132	0.0497413	-0.0846286	-0.0404877										132	-0.0514748	0.0471929	-0.0969139										132	-0.00885994	-0.0471586	-0.0530008										132	0.13033	0.151751	0.108908
	132.5	0.0426009	-0.148892	-0.0456808										132.5	-0.0800366	-0.00928139	-0.152739										132.5	-0.0296321	-0.0679308	-0.0757203										132.5	0.12968	0.147207	0.103715
	133	0.0276709	-0.180051	-0.0495756										133	-0.11444	-0.0332992	-0.185196										133	-0.0627377	-0.0912995	-0.106229										133	0.12968	0.14461	0.0946275
	133.5	0.0101444	-0.20277	-0.0450316										133.5	-0.151441	-0.00473748	-0.172862										133.5	-0.0951942	-0.110124	-0.140633										133.5	0.123189	0.148505	0.0900836
	134	-0.00803123	-0.26249	-0.0339964										134	-0.165073	0.0465438	-0.137809										134	-0.12051	-0.128949	-0.171142										134	0.116698	0.153698	0.0790484
	134.5	-0.0326982	-0.309877	-0.0846286										134.5	-0.147546	0.0815968	-0.101458										134.5	-0.142581	-0.136089	-0.191915										134.5	0.119294	0.155646	0.0680131
	135	-0.0651547	-0.313771	-0.135261										135	-0.09237	0.104965	-0.0631592										135	-0.159458	-0.0919486	-0.201002										135	0.127733	0.151102	0.0628201
	135.5	-0.0963129	-0.269631	-0.139155										135.5	-0.022264	0.114053	0.00175382										135.5	-0.172441	-0.0568956	-0.204897										135.5	0.12968	0.142014	0.0543814
	136	-0.132664	-0.188489	-0.110594										136	0.0387542	0.11665	0.00370121										136	-0.190616	-0.0796151	-0.191265										136	0.123838	0.132926	0.0433462
	136.5	-0.174858	-0.0625582	-0.0671021										136.5	0.0809477	0.109509	-0.0229131										136.5	-0.220476	-0.0874047	-0.145177										136.5	0.103715	0.127733	0.0297145
	137	-0.205367	0.0387061	-0.026856										137	0.104316	0.10172	-0.0164218										137	-0.213336	-0.0627377	-0.0517025										137	0.0790484	0.117347	0.0134862
	137.5	-0.21056	0.0763557	0.00430224										137.5	0.114702	0.0906846	0.0231751										137.5	-0.205546	-0.0224917	0.010614										137.5	0.0602236	0.103715	-0.000794631
	138	-0.191735	0.106216	0.0218287										138	0.117948	0.0770529	0.0712107										138	-0.21788	0.0145087	0.00996483										138	0.0446445	0.0946275	-0.0066368
	138.5	-0.163173	0.148409	0.0335131										138.5	0.122492	0.0692633	0.106264										138.5	-0.179581	0.0424213	0.0184035										138.5	0.0297145	0.0939784	-0.0118298
	139	-0.100208	0.182164	0.04325										139	0.126387	0.0614738	0.121843										139	-0.0932468	0.0612461	0.0554039										139	0.0115388	0.0887853	-0.0222159
	139.5	-0.0625582	0.194497	0.0451974										139.5	0.126387	0.0647194	0.122492										139.5	-0.00561429	0.0677374	0.0969483										139.5	-0.00728593	0.0796975	-0.0384442
	140	-0.0606108	0.193848	0.0445483										140	0.121194	0.0770529	0.121843										140	0.060597	0.0625444	0.128106										140	-0.0248124	0.067364	-0.0598655
	140.5	-0.0359438	0.183462	0.0510396										140.5	0.11665	0.0919829	0.114702										140.5	0.0891587	0.0502109	0.14044										140.5	-0.0390933	0.0556797	-0.0910237
	141	0.0127409	0.174374	0.0627239										141	0.107562	0.0952285	0.107562										141	0.10279	0.0294387	0.135247										141	-0.0689533	0.0452936	-0.122831
	141.5	0.067917	0.159444	0.07311										141.5	0.0971759	0.0913338	0.100422										141.5	0.119668	0.00542092	0.120966										141.5	-0.107252	0.0329601	-0.150744
	142	0.116602	0.13997	0.0698644										142	0.0880881	0.0822459	0.0906846										142	0.128756	-0.0231408	0.109282										142	-0.1462	0.0232232	-0.163726
	142.5	0.147111	0.117251	0.0549344										142.5	0.072509	0.0679651	0.077702										142.5	0.131352	-0.054299	0.106036										142.5	-0.174112	0.0193284	-0.144902
	143	0.154251	0.101672	0.0413027										143	0.0621229	0.0517368	0.0666668										143	0.1333	-0.0835099	0.11058										143	-0.207218	0.0193284	-0.106603
	143.5	0.151006	0.0899874	0.0374079										143.5	0.0478421	0.0432981	0.0582281										143.5	0.13265	-0.100387	0.111229										143.5	-0.234481	0.0102406	-0.137112
	144	0.143865	0.0750574	0.0400044										144	0.0335612	0.0381051	0.0478421										144	0.123563	-0.101036	0.106685										144	-0.229288	0.000503629	-0.165674
	144.5	0.148409	0.0588292	0.04325										144.5	0.0205786	0.0368068	0.0335612										144.5	0.108633	-0.0925977	0.0995448										144.5	-0.172814	-0.00988245	-0.147498
	145	0.149707	0.0341622	0.0419518										145	0.00954338	0.0303155	0.0134382										145	0.0937026	-0.0724747	0.0911061										145	-0.0962167	-0.0137772	-0.0981641
	145.5	0.147111	-0.00218906	0.0335131										145.5	0.000455561	0.0134382	0.00435034										145.5	0.0820183	-0.0484569	0.0787726										145.5	-0.0858307	-0.0222159	-0.0358477
	146	0.137374	-0.0391895	0.0244253										146	-0.00473748	-0.00279009	-0.000193571										146	0.0716322	-0.000421253	0.0703339										146	-0.0709007	-0.0306546	0.0167319
	146.5	0.121146	-0.0846286	0.017934										146.5	-0.0157727	-0.0112288	-0.00473748										146.5	0.0677374	-0.00301777	0.0547548										146.5	-0.017672	-0.0520759	0.0608727
	147	0.108812	-0.120331	0.00884615										147	-0.0281062	-0.00993052	-0.0138253										147	0.0612461	-0.0283338	0.0378774										147	0.0465919	-0.0760937	0.0913818
	147.5	0.0958296	-0.144998	-0.00803123										147.5	-0.042387	-0.00928139	-0.0320009										147.5	0.0547548	-0.0160004	0.0235966										147.5	0.0946275	-0.103357	0.110207
	148	0.082847	-0.158629	-0.0210138										148	-0.0560188	-0.00798313	-0.0592644										148	0.0489126	0.0216492	0.00736831										148	0.12254	-0.129972	0.119944
	148.5	0.0692152	-0.145647	-0.0391895										148.5	-0.0696505	-0.00343922	-0.0793874										148.5	0.0443687	0.0599478	-0.0101582										148.5	0.128382	-0.165674	0.124487
	149	0.0555835	-0.192384	-0.0560669										149	-0.0904226	-0.00538661	-0.0897735										149	0.0469652	0.0930535	-0.0302812										149	0.124487	-0.198779	0.124487
	149.5	0.04325	-0.256648	-0.0748916										149.5	-0.117037	-0.00473748	-0.09237										149.5	0.0469652	0.11058	-0.0471586										149.5	0.112154	-0.231885	0.119944
	150	0.0322148	-0.249508	-0.086576										150	-0.138458	-0.00408835	-0.0891244										150	0.0333335	0.111229	-0.0711764										150	0.103066	-0.268236	0.114751
	150.5	0.032864	-0.166419	-0.0904707										150.5	-0.143651	-0.00603574	-0.0832822										150.5	0.00542092	0.104089	-0.100387										150.5	0.0939784	-0.275377	0.105663
	151	0.0484431	-0.0599616	-0.0898216										151	-0.131318	-0.00993052	-0.0715979										151	-0.034176	0.0891587	-0.129598										151	0.0861888	-0.277973	0.0946275
	151.5	0.0523379	0.032864	-0.0956638										151.5	-0.107949	-0.0105797	-0.0164218										151.5	-0.0900012	0.0768252	-0.156862										151.5	0.0803466	-0.32536	0.0829431
	152	0.0309166	0.100373	-0.0995586										152	-0.0702996	-0.017071	0.0283681										152	-0.157511	0.0683865	-0.168546										152	0.0777501	-0.32536	0.0699605
	152.5	-0.0106278	0.14062	-0.0885234										152.5	0.0114908	-0.0287553	0.00954338										152.5	-0.222424	0.0580005	-0.15037										152.5	0.0686623	-0.268236	0.0576271
	153	-0.0606108	0.157497	-0.0307508										153	0.0510877	-0.0449835	0.00175382										153	-0.249687	0.0411231	-0.129598										153	0.0595745	-0.181902	0.0368549
	153.5	-0.0839794	0.161392	-0.0210138										153.5	0.0160347	-0.0677031	0.0251225										153.5	-0.244494	0.0274913	-0.163353										153.5	0.0498375	-0.0728481	0.0245214
	154	-0.0794355	0.154251	-0.0307508										154	-0.007334	-0.0754927	0.0569299										154	-0.214634	0.0177544	-0.179581										154	0.0368549	-0.027409	0.017381
	154.5	-0.0781373	0.146462	-0.00803123										154.5	0.00759599	-0.0813348	0.0835442										154.5	-0.154914	0.0028244	-0.145177										154.5	0.0310127	-0.0118298	0.0147845
	155	-0.0852777	0.137374	0.0309166										155	0.0381051	-0.0793874	0.104316										155	-0.111422	-0.0160004	-0.0880538										155	0.022574	0.0141354	0.0108897
	155.5	-0.0963129	0.123742	0.0666187										155.5	0.062772	-0.0754927	0.106264										155.5	-0.119212	-0.0250882	-0.0374217										155.5	0.00504754	0.0595745	-0.00209289
	156	-0.107997	0.111409	0.0899874										156	0.0738072	-0.0709487	0.0991233										156	-0.0964925	-0.0283338	-0.00107038										156	-0.017672	0.105663	-0.0189703
	156.5	-0.120331	0.0958296	0.0964787										156.5	0.0718599	-0.0644574	0.0828951										156.5	-0.0257373	-0.0348251	0.0294387										156.5	-0.0339003	0.133575	-0.0384442
	157	-0.120331	0.0757065	0.0867418										157	0.0692633	-0.0527731	0.0679651										157	0.0528074	-0.0458604	0.0567022										157	-0.0494794	0.142014	-0.0520759
	157.5	-0.103453	0.0607766	0.0711626										157.5	0.0640703	-0.0501766	0.0543334										157.5	0.115773	-0.0581938	0.0852639										157.5	-0.062462	0.14461	-0.0754446
	158	-0.0580142	0.0471448	0.0562326										158	0.0562807	-0.0527731	0.0432981										158	0.141738	-0.0679308	0.0962991										158	-0.0806376	0.145909	-0.100761
	158.5	0.00884615	0.032864	0.0464957										158.5	0.0471929	-0.0508257	0.0355086										158.5	0.141738	-0.0530008	0.10344										158.5	-0.113094	0.149154	-0.118936
	159	0.0107935	0.0127409	0.0335131										159	0.0432981	-0.0547205	0.0303155										159	0.131352	-0.0121056	0.106685										159	-0.150095	0.153049	-0.124778
	159.5	0.00624963	-0.011926	0.0211796										159.5	0.0381051	-0.0592644	0.0290173										159.5	0.113826	0.0320352	0.10279										159.5	-0.17606	0.154997	-0.133866
	160	0.0250744	-0.0508738	0.0101444										160	0.0355086	-0.0534222	0.0251225										160	0.10279	0.0722813	0.0969483										160	-0.173463	0.15954	-0.147498
	160.5	0.0568818	-0.0930673	-0.00348732										160.5	0.0335612	-0.0358957	0.0140873										160.5	0.090457	0.0975974	0.0898078										160.5	-0.117638	0.162137	-0.12348
	161	0.0770048	-0.128769	-0.0125751										161	0.027719	-0.00863226	0.00629773										161	0.0839657	0.106036	0.0826674										161	-0.097515	0.16019	-0.111147
	161.5	0.0750574	-0.15798	-0.0203647										161.5	0.0114908	0.0166838	-0.00863226										161.5	0.0722813	0.100843	0.0761761										161.5	-0.11634	0.154997	-0.132568
	162	0.0692152	-0.179402	-0.0313999										162	-0.022264	0.0342103	-0.037194										162	0.0618952	0.0943517	0.0709831										162	-0.0994624	0.143312	-0.10855
	162.5	0.0633731	-0.193682	-0.0515229										162.5	-0.0638083	0.0368068	-0.067054										162.5	0.0528074	0.0865622	0.06579										162.5	-0.0390933	0.133575	-0.0436372
	163	0.0542853	-0.199525	-0.0761899										163	-0.0839313	0.0335612	-0.0858787										163	0.0424213	0.0696848	0.0631935										163	0.0264688	0.119944	0.0264688
	163.5	0.0484431	-0.16577	-0.0956638										163.5	-0.0806857	0.0335612	-0.10016										163.5	0.0300879	0.0495618	0.0541057										163.5	0.0764518	0.111505	0.0758027
	164	0.0426009	-0.159279	-0.104752										164	-0.0741944	0.0348595	-0.120932										164	0.015807	0.0300879	0.0437196										164	0.103715	0.105663	0.102417
	164.5	0.038057	-0.16577	-0.100208										164.5	-0.0780892	0.0355086	-0.143651										164.5	-0.0179478	0.0145087	0.0352809										164.5	0.114101	0.0933292	0.117347
	165	0.0283201	-0.12098	-0.0904707										165	-0.108598	0.0296664	-0.168967										165	-0.054299	0.00217527	0.0300879										165	0.109557	0.0829431	0.126435
	165.5	0.0185831	-0.0307508	-0.0742425										165.5	-0.143002	0.0199295	-0.192336										165.5	-0.0848082	-0.0127547	0.015807										165.5	0.102417	0.0706097	0.134224
	166	0.0159866	0.0542853	-0.0281543										166	-0.163125	0.00694686	-0.203371										166	-0.100387	-0.0406673	-0.00561429										166	0.0998205	0.0602236	0.141365
	166.5	0.017934	0.107514	-0.0294525										166.5	-0.149493	0.00240295	-0.180003										166.5	-0.114019	-0.0770186	-0.0257373										166.5	0.0965749	0.0485392	0.143961
	167	0.0107935	0.135426	-0.041786										167	-0.104054	0.00110469	-0.0949666										167	-0.132195	-0.110773	-0.0400182										167	0.0855397	0.0342584	0.127733
	167.5	-0.00024167	0.14776	-0.0177682										167.5	-0.0469309	-0.00279009	-0.0709487										167.5	-0.151669	-0.129598	-0.0620886										167.5	0.0699605	0.0251706	0.108908
	168	-0.0177682	0.14776	0.0296183										168	-0.012527	-0.00668487	-0.0728961										168	-0.175686	-0.123107	-0.0848082										168	0.052434	0.0180301	0.0946275
	168.5	-0.0391895	0.142567	0.0646713										168.5	0.00954338	-0.00343922	-0.0475801										168.5	-0.18802	-0.102984	-0.110124										168.5	0.0394514	0.0147845	0.0907327
	169	-0.061909	0.132181	0.0847944										169	0.0257716	0.00110469	-0.00473748										169	-0.18023	-0.0646851	-0.127002										169	0.0355566	0.0128371	0.0861888
	169.5	-0.0924181	0.115303	0.101672										169.5	0.042649	-0.000193571	0.0309647										169.5	-0.153616	0.00347353	-0.136089										169.5	0.0310127	0.00374928	0.0809957
	170	-0.148243	0.097777	0.115953										170	0.0595264	0.000455561	0.057579										170	-0.0776677	-0.00691255	-0.119212										170	0.0277671	-0.00144376	0.0693114
	170.5	-0.209262	0.0912857	0.124391										170.5	0.0705616	-0.00863226	0.0679651										170.5	-0.0205443	-0.0387199	-0.10558										170.5	0.022574	-0.00728593	0.052434
	171	-0.237174	0.0886891	0.12569										171	0.0783512	-0.0105797	0.0751055										171	0.00412266	-0.0348251	-0.151019										171	0.0199775	-0.0144264	0.0362058
	171.5	-0.231981	0.0925839	0.123093										171.5	0.0796494	-0.0144744	0.0757546										171.5	0.0385265	0.00412266	-0.175037										171.5	0.0212758	-0.0241633	0.0147845
	172	-0.198875	0.0899874	0.115953										172	0.0815968	-0.017071	0.0705616										172	0.0852639	0.0437196	-0.160756										172	0.012188	-0.0416898	0.00115276
	172.5	-0.126173	0.0821978	0.11011										172.5	0.0828951	-0.0203166	0.0692633										172.5	0.126808	0.0670883	-0.115966										172.5	-0.00598767	-0.0644094	-0.0137772
	173	-0.0885234	0.0672679	0.107514										173	0.0828951	-0.0151236	0.072509										173	0.143036	0.0729304	-0.0627377										173	-0.0345494	-0.0793394	-0.0287072
	173.5	-0.0943655	0.0523379	0.101672										173.5	0.0796494	-0.0118779	0.0802986										173.5	0.143036	0.0631935	-0.00626342										173.5	-0.067655	-0.0942694	-0.0410407
	174	-0.0690495	0.0406535	0.0932331										174	0.0686142	-0.017071	0.0802986										174	0.138493	0.0502109	0.0781235										174	-0.104006	-0.113094	-0.0598655
	174.5	-0.00283819	0.0237761	0.0796013										174.5	0.0536842	-0.0384922	0.0751055										174.5	0.136545	0.0333335	0.101492										174.5	-0.147498	-0.132568	-0.0864798
	175	0.0672679	0.00105659	0.0692152										175	0.0445964	-0.0605627	0.0640703										175	0.1333	0.0132105	0.0826674										175	-0.178656	-0.155937	-0.105954
	175.5	0.115953	-0.046979	0.0523379										175.5	0.0478421	-0.0586153	0.0536842										175.5	0.122264	-0.00691255	0.0833165										175.5	-0.192937	-0.194235	-0.129972
	176	0.142567	-0.117085	0.0361096										176	0.0497894	-0.0449835	0.0407016										176	0.106685	-0.0400182	0.105387										176	-0.202674	-0.259148	-0.149445
	176.5	0.149058	-0.180051	0.023127										176.5	0.0497894	-0.0300536	0.0296664										176.5	0.0924043	-0.0964925	0.129405										176.5	-0.16827	-0.337044	-0.15334
	177	0.142567	-0.220297	0.00884615										177	0.0491403	-0.0209657	0.0147364										177	0.0820183	-0.164651	0.141738										177	-0.147498	-0.397413	-0.133866
	177.5	0.134777	-0.2177	-0.00413645										177.5	0.0484912	-0.0229131	0.00110469										177.5	0.0742287	-0.213985	0.142387										177.5	-0.132568	-0.413641	-0.0747955
	178	0.130233	-0.21056	-0.0210138										178	0.0329121	-0.0345975	-0.00473748										178	0.0547548	-0.221775	0.135896										178	-0.0683042	-0.350027	-0.0488303
	178.5	0.131532	-0.250157	-0.0398386										178.5	0.00435034	-0.0248605	-0.0183692										178.5	0.0385265	-0.193213	0.119668										178.5	0.022574	-0.3325	-0.0864798
	179	0.132181	-0.257297	-0.0658038										179	-0.022264	0.0322629	-0.0365449										179	0.0294387	-0.133493	0.102141										179	0.0998205	-0.320167	-0.0994624
	179.5	0.130233	-0.209262	-0.0839794										179.5	-0.0417379	0.0303155	-0.0501766										179.5	0.0222983	-0.0257373	0.0872113										179.5	0.140716	-0.247464	-0.0559707
	180	0.121146	-0.126822	-0.0976112										180	-0.0599135	-0.00214096	-0.0586153										180	0.015807	0.0190526	0.0716322										180	0.153049	-0.129972	0.0128371
	180.5	0.11011	-0.036593	-0.101506										180.5	-0.0735453	-0.00214096	-0.0638083										180.5	0.00542092	0.015807	0.0638426										180.5	0.1524	-0.017672	0.077101
	181	0.0951804	0.0510396	-0.0937164										181	-0.0917209	0.0264208	-0.0761418										181	-0.00821081	0.0333335	0.0560531										181	0.147207	0.0654166	0.118645
	181.5	0.0808996	0.113356	-0.0781373										181.5	-0.104704	0.0588773	-0.0904226										181.5	-0.0302812	0.0768252	0.0437196										181.5	0.139417	0.125137	0.140067
	182	0.0607766	0.173725	-0.0437334										182	-0.11509	0.0790003	-0.0904226										182	-0.0523517	0.111878	0.030737										182	0.130979	0.0874871	0.142014
	182.5	0.0438992	0.202287	-0.0528212										182.5	-0.131318	0.0770529	-0.0839313										182.5	-0.0750712	0.127457	0.0184035										182.5	0.120593	0.032311	0.139417
	183	0.0387061	0.152953	-0.119682										183	-0.152739	0.0712107	-0.0748435										183	-0.0932468	0.126808	0.00412266										183	0.110856	0.0310127	0.130979
	183.5	0.0413027	0.11076	-0.143699										183.5	-0.16702	0.062772	-0.0618609										183.5	-0.111422	0.10279	-0.00691255										183.5	0.102417	0.0835923	0.119944
	184	0.0451974	0.102321	-0.117085										184	-0.161827	0.0601755	-0.037194										184	-0.132844	0.0560531	-0.0270356										184	0.0926801	0.151102	0.105014
	184.5	0.0387061	0.109461	-0.061909										184.5	-0.131967	0.0595264	-0.00863226										184.5	-0.167897	-0.00301777	-0.0484569										184.5	0.0842414	0.203032	0.0926801
	185	0.0211796	0.115303	-0.00543471										185	-0.0696505	0.0582281	0.0238242										185	-0.1653	-0.054299	-0.0731238										185	0.0745045	0.228997	0.0777501
	185.5	-0.00348732	0.112707	0.0322148										185.5	0.0192803	0.0491403	0.0497894										185.5	-0.175037	-0.0854573	-0.101036										185.5	0.067364	0.232892	0.0589253
	186	-0.0255577	0.106865	0.0568818										186	0.0296664	0.0419999	0.10172										186	-0.185423	-0.114019	-0.127002										186	0.0543814	0.22705	0.0413988
	186.5	-0.0372421	0.101023	0.0737592										186.5	0.0134382	0.0368068	0.0731581										186.5	-0.132195	-0.153616	-0.151019										186.5	0.0407497	0.216015	0.0297145
	187	-0.0352947	0.0906365	0.0867418										187	0.0303155	0.0264208	0.00305208										187	-0.0517025	-0.186072	-0.154914										187	0.0238723	0.199787	0.0212758
	187.5	-0.0223121	0.0783031	0.0893383										187.5	0.0679651	0.0140873	-0.0242114										187.5	0.0093157	-0.186722	-0.128949										187.5	0.00699493	0.187453	0.0193284
	188	-0.0177682	0.0594783	0.0932331										188	0.0952285	0.00629773	-0.00279009										188	0.0554039	-0.142581	-0.149721										188	-0.0066368	0.17447	0.0232232
	188.5	-0.0339964	0.0367587	0.0945313										188.5	0.108211	-0.00214096	0.0407016										188.5	0.0878604	-0.049106	-0.155563										188.5	-0.0183211	0.166032	0.0154336
	189	-0.0586634	0.0107935	0.0925839										189	0.107562	-0.00798313	0.0686142										189	0.119668	-0.0205443	-0.125703										189	-0.0384442	0.164084	0.00180189
	189.5	-0.0761899	-0.0255577	0.0860926										189.5	0.103667	-0.0112288	0.0751055										189.5	0.144984	-0.0198952	-0.0620886										189.5	-0.0663568	0.164084	-0.0163738
	190	-0.0872251	-0.0872251	0.0783031										190	0.0997725	-0.0177201	0.0660177										190	0.167703	0.00801744	-0.000421253										190	-0.0929711	0.164084	-0.037795
	190.5	-0.0911199	-0.158629	0.0692152										190.5	0.0939303	-0.0268079	0.0497894										190.5	0.169002	0.0670883	0.0554039										190.5	-0.109848	0.155646	-0.0721989
	191	-0.086576	-0.213156	0.0601274										191	0.0770529	-0.0307027	0.0439473										191	0.158616	0.123563	0.090457										191	-0.131919	0.143961	-0.118936
	191.5	-0.0742425	-0.236525	0.0497413										191.5	0.062772	-0.0332992	0.0413508										191.5	0.142387	0.151475	0.107983										191.5	-0.139708	0.121891	-0.173463
	192	-0.0508738	-0.231332	0.0413027										192	0.0601755	-0.0417379	0.037456										192	0.121615	0.161212	0.116422										192	-0.142305	0.105663	-0.210464
	192.5	-0.021663	-0.203419	0.0270218										192.5	0.0582281	-0.052124	0.027719										192.5	0.10279	0.158616	0.11837										192.5	-0.148147	0.0894344	-0.209815
	193	0.00624963	-0.165121	0.0166357										193	0.0556316	-0.0547205	0.00629773										193	0.0924043	0.151475	0.119019										193	-0.126077	0.0764518	-0.171516
	193.5	0.0244253	-0.124875	0.0101444										193.5	0.052386	-0.0488783	-0.0105797										193.5	0.0781235	0.141089	0.120966										193.5	-0.116989	0.0667149	-0.12348
	194	0.0438992	-0.0651547	0.00365311										194	0.0407016	-0.0410888	-0.0235623										194	0.0696848	0.131352	0.113826										194	-0.137112	0.0628201	-0.0683042
	194.5	0.0568818	-0.0599616	-0.00413645										194.5	0.0212277	-0.0378431	-0.0281062										194.5	0.0638426	0.12551	0.10344										194.5	-0.107901	0.0602236	-0.0209177
	195	0.0692152	-0.0735934	-0.0184173										195	0.00499947	-0.0527731	-0.0313518										195	0.0573513	0.112527	0.0969483										195	-0.0358477	0.0589253	0.0206267
	195.5	0.0685661	-0.0502247	-0.0424351										195.5	-0.00214096	-0.0690014	-0.0378431										195.5	0.0482635	0.0924043	0.0898078										195.5	0.0368549	0.0511358	0.0628201
	196	0.0627239	0.00170572	-0.0671021										196	-0.00668487	-0.0696505	-0.052124										196	0.03593	0.0586496	0.0787726										196	0.0881362	0.0465919	0.135523
	196.5	0.0562326	0.052987	-0.0937164										196.5	-0.00538661	-0.0605627	-0.0702996										196.5	0.0203509	0.0177544	0.0670883										196.5	0.110207	0.0413988	0.154997
	197	0.0451974	0.0984261	-0.117734										197	-0.0157727	-0.0456327	-0.102107										197	0.00152614	-0.0147021	0.0528074										197	0.12254	0.0290654	0.109557
	197.5	0.0367587	0.130883	-0.134612										197.5	-0.0436853	-0.0307027	-0.126125										197.5	-0.0172986	-0.0387199	0.0411231										197.5	0.132926	0.0167319	0.0868379
	198	0.0315657	0.151006	-0.147594										198	-0.0748435	-0.0183692	-0.128072										198	-0.034176	-0.058843	0.0313861										198	0.139417	0.00699493	0.10047
	198.5	0.0302674	0.149058	-0.156033										198.5	-0.0878261	-0.00214096	-0.124177										198.5	-0.0517025	-0.0737729	0.0248948										198.5	0.13747	0.000503629	0.125786
	199	0.023127	0.136725	-0.132015										199	-0.0748435	0.00889425	-0.110546										199	-0.0666325	-0.0763695	0.010614										199	0.136821	-0.00858419	0.134874
	199.5	0.0146883	0.122444	-0.113839										199.5	-0.0527731	0.0121399	-0.0878261										199.5	-0.0887029	-0.0672816	-0.00691255										199.5	0.134224	-0.0150755	0.12968
[truncated: 1 more columns]
