# Supplementary material for: Analogue closed-loop optogenetic modulation of hippocampal pyramidal cells dissociates gamma frequency and amplitude
Source: eLife. 2018 Oct 23;7:e38346. doi: 10.7554/eLife.38346 (PMC6219844; doi:10.7554/eLife.38346)
Supplement: Figure 3—source data 1. [file elife-38346-fig3-data1.xlsx]

## Sheet: Fig.3_abcData
Panels a-c																										Panel d
		Source Identifier
Pclamped/Punclamped		13.09.25.011	13.09.27.009	13.10.03	13.10.09.010	13.10.21.005	13.11.04.012	14.02.25.003	14.03.03.004	14.05.01.003	14.05.02.003	14.05.06.003&10&06	14.05.13.003	15.04.10.017	15.06.10.003	15.07.10.003_5_6	15.07.10.015	15.09.04.018	15.12.16.008	15.12.22.005		Average	SEM			Phase (º)	LFP	Phase response (º)		Phase difference (º)	Circular cross-correlation
	LED-LFP phase difference (º)																									0	0.3	-7.2		-180	-1.54807
	-157.921	1.35636			1.02279					0.992524		1.34844	1.5278		1.7339	1.21892	2.02341		0.664501	1.25389		1.31425	0.122517			3.6	0.32	0		-176.4	-1.48815
	-112.801			4.30634	1.76146	1.99258	2.50926	2.11941	1.25221	1.62632	1.52632	2.62994	2.51105	3.13052	3.53298	2.37742	3.45216	5.54341	1.32372	2.17584		2.57476	0.274788			7.2	0.34	7.2		-172.8	-1.42479
	-67.6806											3.86148	2.00783	4.31021	1.74598	2.18989			1.84086	3.26822		2.74635	0.397529			10.8	0.36	14.4		-169.2	-1.35819
	-22.5602	1.74862	0.913738		1.08208			1.24768	1.14989	1.70673	1.16053	2.21649	1.12054		1.81859	3.45784	5.10337	3.62255	1.74244			2.00651	0.3271			14.4	0.38	21.6		-165.6	-1.28852
	22.5602	0.414775	1.10069	0.778691	0.394699	0.794748	0.987824	2.51892		1.37898	0.896718	1.10411	0.769744			1.30461	3.10545	0.877982	1.53887			1.19779	0.189984			18	0.4	23.4		-162	-1.21608
	67.6806	0.44243		0.826201	0.647448	0.682015	0.806359			1.1077	0.552462	0.493578	0.58227	0.587775	1.36203	0.241118		0.719305	0.900973	1.18656		0.742549	0.077242			21.6	0.41	25.2		-158.4	-1.14117
	112.801							0.504552			0.51322	0.4337	0.71026						1.26282	0.751799		0.696059	0.124293			25.2	0.415	27		-154.8	-1.0641
	157.921	0.654039			0.930066			1.27151	0.862135	0.82527	1.02954	0.81999	1.05742	1.27502	1.10511	0.327312	1.67707	2.66325	0.802519	1.25879		1.10394	0.137881			28.8	0.41	28.8		-151.2	-0.985165
																										32.4	0.405	30.6		-147.6	-0.904675
Fclamped/Funclamped																										36	0.4	32.4		-144	-0.822925
	LED-LFP phase difference (º)																									39.6	0.39	34.2		-140.4	-0.740215
	-157.921	0.816732			1.00881					0.942129		0.848738	0.884541		0.811862	0.709038	0.536129		0.896922	0.969613		0.842451	0.0436895			43.2	0.38	36		-136.8	-0.656852
	-112.801			0.790154	1.02365	0.97928	0.991768	0.905879	0.984854	0.955359	0.915488	0.930517	0.946885	0.80912	0.685502	0.86582	0.76243	0.766173	0.912656	0.848072		0.886682	0.023314			46.8	0.37	37.8		-133.2	-0.57313
	-67.6806											0.966222	1.03168	0.777977	0.883671	0.874945			0.866404	0.907196		0.901156	0.0303472			50.4	0.36	39.6		-129.6	-0.48931
	-22.5602	1.07363	1.17268		1.06631			0.965844	0.989121	1.02703	1.04872	1.04004	1.05811		0.932201	1.20539	1.15211	1.14283	0.959182			1.05951	0.0224102			54	0.35	41.4		-126	-0.405655
	22.5602	1.19884	1.27729	1.20021	1.12669	1.25212	1.39201	0.865468		1.05274	1.15236	1.28671	1.11582			1.38167	1.26687	1.32626	1.07504			1.19801	0.0358819			57.6	0.34	39.6		-122.4	-0.322355
	67.6806	1.16584		1.11879	1.06928	1.17185	1.08683			1.04393	1.10058	1.18285	1.00123	1.20836	1.04268	1.28089		1.20607	1.08725	1.01736		1.11892	0.020857			61.2	0.33	37.8		-118.8	-0.239575
	112.801							1.05462			0.998175	1.02534	0.935845						0.943827	0.869705		0.971251	0.0276391			64.8	0.32	36		-115.2	-0.15744
	157.921	0.766658			0.961246			0.889793	0.995181	0.983429	0.964391	0.909029	0.927481	0.820416	0.905779	0.649423	0.503076	0.654126	0.901285	0.718547		0.836657	0.037956			68.4	0.31	34.2		-111.6	-0.075995
																										72	0.3	32.4		-108	0.004715
																										75.6	0.29	30.6		-104.4	0.084725
																										79.2	0.28	28.8		-100.8	0.164108
																										82.8	0.27	27		-97.2	0.242975
																										86.4	0.26	25.2		-93.6	0.32144
																										90	0.25	23.4		-90	0.39955
																										93.6	0.24	21.6		-86.4	0.477305
																										97.2	0.23	18.9		-82.8	0.5547
																										100.8	0.22	16.2		-79.2	0.63173
																										104.4	0.21	13.5		-75.6	0.70839
																										108	0.2	10.8		-72	0.784635
																										111.6	0.19	8.1		-68.4	0.86034
																										115.2	0.18	5.4		-64.8	0.93534
																										118.8	0.17	2.7		-61.2	1.00948
																										122.4	0.16	0		-57.6	1.08265
																										126	0.15	-1.8		-54	1.15473
																										129.6	0.14	-3.6		-50.4	1.22558
																										133.2	0.13	-5.4		-46.8	1.29507
																										136.8	0.12	-7.2		-43.2	1.36303
																										140.4	0.11	-9		-39.6	1.42935
																										144	0.1	-10.8		-36	1.49373
																										147.6	0.09	-12.6		-32.4	1.55586
																										151.2	0.08	-14.4		-28.8	1.61529
																										154.8	0.07	-16.2		-25.2	1.67152
																										158.4	0.06	-18		-21.6	1.72408
																										162	0.05	-19.8		-18	1.7725
																										165.6	0.04	-21.6		-14.4	1.81632
																										169.2	0.03	-23.4		-10.8	1.85508
																										172.8	0.02	-25.2		-7.2	1.8885
																										176.4	0.01	-27		-3.6	1.91637
																										180	0	-28.8		0	1.93804
																										183.6	-0.01	-30.6		3.6	1.95245
																										187.2	-0.02	-30.96		7.2	1.95851
																										190.8	-0.03	-31.32		10.8	1.95494
																										194.4	-0.04	-31.68		14.4	1.94031
																										198	-0.05	-32.04		18	1.91319
																										201.6	-0.06	-32.4		21.6	1.8722
																										205.2	-0.07	-32.76		25.2	1.81596
																										208.8	-0.08	-33.12		28.8	1.74383
																										212.4	-0.09	-33.48		32.4	1.656
																										216	-0.1	-33.84		36	1.55285
																										219.6	-0.11	-34.2		39.6	1.43516
																										223.2	-0.12	-34.56		43.2	1.30397
																										226.8	-0.13	-34.92		46.8	1.16051
																										230.4	-0.14	-35.28		50.4	1.00636
																										234	-0.15	-35.64		54	0.84319
																										237.6	-0.16	-36		57.6	0.672815
																										241.2	-0.17	-36.36		61.2	0.497022
																										244.8	-0.18	-36.72		64.8	0.317585
																										248.4	-0.19	-37.08		68.4	0.136475
																										252	-0.2	-37.44		72	-0.04411
																										255.6	-0.22	-37.8		75.6	-0.22206
																										259.2	-0.26	-37.62		79.2	-0.39554
																										262.8	-0.31	-37.44		82.8	-0.562715
																										266.4	-0.36	-37.26		86.4	-0.72205
																										270	-0.41	-37.08		90	-0.872313
																										273.6	-0.46	-36.9		93.6	-1.0127
																										277.2	-0.51	-36.72		97.2	-1.14265
																										280.8	-0.56	-36.54		100.8	-1.26188
																										284.4	-0.61	-36.36		104.4	-1.3703
																										288	-0.65	-36.18		108	-1.46803
																										291.6	-0.68	-36		111.6	-1.55517
																										295.2	-0.69	-35.64		115.2	-1.63198
																										298.8	-0.7	-35.28		118.8	-1.6987
																										302.4	-0.69	-34.92		122.4	-1.75533
																										306	-0.67	-34.56		126	-1.80188
																										309.6	-0.64	-34.2		129.6	-1.83847
																										313.2	-0.59	-33.84		133.2	-1.86535
																										316.8	-0.53	-33.48		136.8	-1.88285
																										320.4	-0.45	-33.12		140.4	-1.89145
																										324	-0.36	-32.76		144	-1.89165
																										327.6	-0.27	-32.4		147.6	-1.884
																										331.2	-0.18	-32.04		151.2	-1.8691
																										334.8	-0.09	-31.68		154.8	-1.84756
																										338.4	0	-31.32		158.4	-1.81995
																										342	0.09	-30.96		162	-1.78669
																										345.6	0.18	-30.6		165.6	-1.74813
																										349.2	0.24	-25.2		169.2	-1.70464
																										352.8	0.26	-19.8		172.8	-1.65659
																										356.4	0.28	-14.4		176.4	-1.6043
																										360	0.3	-7.2		180	-1.54807
																										363.6	0.32	0
																										367.2	0.34	7.2
																										370.8	0.36	14.4
																										374.4	0.38	21.6
																										378	0.4	23.4
																										381.6	0.41	25.2
																										385.2	0.415	27
																										388.8	0.41	28.8
																										392.4	0.405	30.6
																										396	0.4	32.4
																										399.6	0.39	34.2
																										403.2	0.38	36
																										406.8	0.37	37.8
																										410.4	0.36	39.6
																										414	0.35	41.4
																										417.6	0.34	39.6
																										421.2	0.33	37.8
																										424.8	0.32	36
																										428.4	0.31	34.2
																										432	0.3	32.4
																										435.6	0.29	30.6
																										439.2	0.28	28.8
																										442.8	0.27	27
																										446.4	0.26	25.2
																										450	0.25	23.4
																										453.6	0.24	21.6
																										457.2	0.23	18.9
																										460.8	0.22	16.2
																										464.4	0.21	13.5
																										468	0.2	10.8
																										471.6	0.19	8.1
																										475.2	0.18	5.4
																										478.8	0.17	2.7
																										482.4	0.16	0
																										486	0.15	-1.8
																										489.6	0.14	-3.6
																										493.2	0.13	-5.4
																										496.8	0.12	-7.2
																										500.4	0.11	-9
																										504	0.1	-10.8
																										507.6	0.09	-12.6
																										511.2	0.08	-14.4
																										514.8	0.07	-16.2
																										518.4	0.06	-18
																										522	0.05	-19.8
																										525.6	0.04	-21.6
																										529.2	0.03	-23.4
																										532.8	0.02	-25.2
																										536.4	0.01	-27
																										540	0	-28.8
																										543.6	-0.01	-30.6
																										547.2	-0.02	-30.96
																										550.8	-0.03	-31.32
																										554.4	-0.04	-31.68
																										558	-0.05	-32.04
																										561.6	-0.06	-32.4
																										565.2	-0.07	-32.76
																										568.8	-0.08	-33.12
																										572.4	-0.09	-33.48
																										576	-0.1	-33.84
																										579.6	-0.11	-34.2
																										583.2	-0.12	-34.56
																										586.8	-0.13	-34.92
																										590.4	-0.14	-35.28
																										594	-0.15	-35.64
																										597.6	-0.16	-36
																										601.2	-0.17	-36.36
																										604.8	-0.18	-36.72
																										608.4	-0.19	-37.08
																										612	-0.2	-37.44
																										615.6	-0.22	-37.8
																										619.2	-0.26	-37.62
																										622.8	-0.31	-37.44
																										626.4	-0.36	-37.26
																										630	-0.41	-37.08
																										633.6	-0.46	-36.9
																										637.2	-0.51	-36.72
																										640.8	-0.56	-36.54
																										644.4	-0.61	-36.36
																										648	-0.65	-36.18
																										651.6	-0.68	-36
																										655.2	-0.69	-35.64
																										658.8	-0.7	-35.28
																										662.4	-0.69	-34.92
																										666	-0.67	-34.56
																										669.6	-0.64	-34.2
																										673.2	-0.59	-33.84
																										676.8	-0.53	-33.48
																										680.4	-0.45	-33.12
																										684	-0.36	-32.76
																										687.6	-0.27	-32.4
																										691.2	-0.18	-32.04
																										694.8	-0.09	-31.68
																										698.4	0	-31.32
																										702	0.09	-30.96
																										705.6	0.18	-30.6
																										709.2	0.24	-25.2
																										712.8	0.26	-19.8
																										716.4	0.28	-14.4
																										720	0.3	-7.2
