# Supplementary material for: Analogue closed-loop optogenetic modulation of hippocampal pyramidal cells dissociates gamma frequency and amplitude
Source: eLife. 2018 Oct 23;7:e38346. doi: 10.7554/eLife.38346 (PMC6219844; doi:10.7554/eLife.38346)
Supplement: Figure 4—source data 1. [file elife-38346-fig4-data1.xlsx]

## Sheet: Sheet2
Panel a																																Panel b
											Sample traces centred on spike																																Sample traces centred on spike
	Unclamped				Clamped						Unclamped	LFP (mV)							Clamped	LFP (mV)								# Spikes					Unclamped				Clamped						Unclamped	LFP (mV)
	Time (ms)	Current (pA)	LFP (mV)		Time (ms)	Current (pA)	LFP (mV)	LED driver command			Time (ms)	Trace 1	Trace 2	Trace 3	Trace 4	Trace 5	Trace 6		Time (ms)	Trace 1	Trace 2	Trace 3	Trace 4	Trace 5	Trace 6		Centre phase (º)	Unclamped	Clamped				Time (ms)	Current (pA)	LFP (mV)		Time (ms)	Current (pA)	LFP (mV)	LED driver command			Time (ms)	Trace 1	Trace 2	Trace 3	Trace 4	Trace 5	Trace 6
	0	-22.6585	0.0436363		0	-7.07942	-0.0417113	113.633			-50	-0.0795574	-0.023763	0.0153308	0.000444652	0.0230068	0.00258354		-50	-0.0284741	0.0255546	0.049157	-0.103527	0.0656806	-0.101819		10	147	243				0	-8.37768	0.0306306		0	-24.6059	0.021982	442.92			-50	0.0380536	0.0508658	0.0548596	0.0579446	-0.0786291	0.00664871
	0.5	-16.1672	0.0397861		0.5	-25.9042	-0.0519786	95.8471			-49.5	-0.0652765	-0.00493826	0.0250678	-0.00215187	0.0152172	0.00518006		-49.5	-0.018088	0.0398355	0.0413674	-0.0749648	0.0689262	-0.0739067		40	101	81				0.5	-14.869	0.0299099		0.5	-18.1146	0.0356756	441.583			-49.5	0.0445449	0.0489184	0.0632983	0.059892	-0.0695413	0.00210481
	1	-25.9042	0.0391444		1	-25.9042	-0.0648128	74.1662			-49	-0.0419078	0.0158339	0.0348047	-0.00474839	0.00418202	0.00842571		-49	-0.00185976	0.0560637	0.0387709	-0.0405609	0.0721719	-0.0440467		70	25	5				1	-23.3077	0.0241441		1	-17.4655	0.0414414	440.583			-49	0.0451941	0.0404797	0.0684913	0.0592429	-0.0591552	-0.000491718
	1.5	0.061011	0.037861		1.5	-6.43029	-0.066738	60.1774			-48.5	-0.0152935	0.0353078	0.0419452	-0.00864317	0.00418202	0.00972397		-48.5	0.016965	0.0729411	0.0387709	-0.0126483	0.0747684	-0.0148359		100	10	1				1.5	-23.3077	0.0147748		1.5	-21.3603	0.0479279	439.83			-48.5	0.0445449	0.0307428	0.0671931	0.0540498	-0.0357865	0.00340307
	2	-4.4829	0.0314438		2	-16.1672	-0.0526204	78.1583			-48	0.00872431	0.0482904	0.0464891	-0.00539752	0.00612941	0.0103731		-48	0.0325441	0.0839763	0.03942	0.00877299	0.0689262	0.0124276		130	6	2				2	-10.9742	0.000360366		2	-28.5007	0.0580181	387.977			-48	0.0458432	0.0229532	0.0613509	0.050155	-0.00138265	0.00924523
	2.5	-20.7111	0.0231016		2.5	-18.1146	-0.0282353	123.727			-47.5	0.0236543	0.0567291	0.0471382	-0.002801	0.013919	0.0162153		-47.5	0.0435793	0.087222	0.0426657	0.0204573	0.0624349	0.0319015		160	2	0				2.5	-12.9216	-0.0154955		2.5	-1.88638	0.0681082	387.055			-47.5	0.0438958	0.0184093	0.0529122	0.0404181	0.0297756	0.0137891
	3	-23.3077	0.0147594		3	-4.4829	-0.00705883	168.387			-47	0.0359878	0.0638695	0.0432434	-0.00150274	0.0178137	0.0220574		-47	0.0507198	0.0839763	0.0433148	0.0275978	0.057891	0.0461824		190	7	2				3	-12.9216	-0.0342342		3	-7.72855	0.0717118	386.426			-47	0.040001	0.0171111	0.0438244	0.0339268	0.0498986	0.0202804
	3.5	-7.72855	0.00320855		3.5	-12.9216	0.0109091	206.589			-46.5	0.0424791	0.0697117	0.0374013	-0.0092923	0.0165155	0.0278996		-46.5	0.0526672	0.0768359	0.0407183	0.0327908	0.0533471	0.0565684		220	11	6				3.5	-23.3077	-0.0551351		3.5	-18.1146	0.070991	386.075			-46.5	0.0322115	0.0184093	0.0340874	0.0274355	0.0576882	0.0267717
	4	-4.4829	-0.0211765		4	-18.7638	0.0263101	236.027			-46	0.0431282	0.0723082	0.0341556	-0.0274679	0.0145681	0.0285487		-46	0.0539654	0.0677481	0.0413674	0.0418786	0.0449084	0.0611123		250	27	22				4	-29.799	-0.0753154		4	-12.2725	0.0637838	368.133			-46	0.0263693	0.0190585	0.0275961	0.0196459	0.0609338	0.033263
	4.5	-12.9216	-0.037861		4.5	-19.4129	0.0436363	273.968			-45.5	0.0418299	0.0736065	0.0348047	-0.0423979	0.0106733	0.029847		-45.5	0.0507198	0.0586603	0.0420166	0.0490191	0.032575	0.0617615		280	50	90				4.5	-18.1146	-0.0882883		4.5	-15.5181	0.0486486	370.353			-45.5	0.0257202	0.0138654	0.026947	0.00601419	0.0628812	0.0462456
	5	-1.88638	-0.0391444		5	-18.7638	0.066738	313.241			-45	0.0424791	0.0736065	0.0348047	-0.0514857	0.00093637	0.0311453		-45	0.0448776	0.0547655	0.0426657	0.053563	0.0234871	0.0578667		310	107	185				5	-23.3077	-0.0904505		5	-16.8164	0.0378378	371.678			-45	0.0283167	0.00867238	0.0288944	-0.00956493	0.0654777	0.0527369
	5.5	-23.3077	-0.0410695		5.5	-9.67594	0.0859892	354.461			-44.5	0.0398826	0.0690626	0.0296117	-0.0553805	-0.0120462	0.0324435		-44.5	0.041632	0.0534672	0.0420166	0.0561595	0.0234871	0.054621		340	156	284				5.5	-2.53551	-0.083964		5.5	-12.9216	0.0349549	372.242			-44.5	0.0283167	0.00802325	0.0301927	-0.0212493	0.0700217	0.0527369
	6	-25.2551	-0.0423529		6	-6.43029	0.0968984	386.56			-44	0.037286	0.0619221	0.0224713	-0.0501875	-0.0224323	0.0343909		-44	0.0383863	0.0502216	0.0387709	0.053563	0.0273819	0.0481297								6	-29.1498	-0.0717118		6	-5.13203	0.0335135	307.641			-44	0.0257202	0.0125672	0.0262979	-0.0290388	0.0752147	0.0494913
	6.5	-14.2198	-0.037861		6.5	-20.062	0.0994652	391.331			-43.5	0.0346895	0.0580274	0.0198747	-0.0398014	-0.0328184	0.0356892		-43.5	0.0325441	0.0450285	0.0322796	0.0496682	0.0286802	0.0409893								6.5	-25.9042	-0.0565765		6.5	-28.5007	0.021982	308.537			-43.5	0.0231236	0.0125672	0.0243505	-0.0368284	0.076513	0.0442983
	7	-9.67594	-0.0301604		7	-5.78116	0.0988235	386.755			-43	0.0314439	0.0534834	0.0231204	-0.0320118	-0.0354149	0.039584		-43	0.0299476	0.0411337	0.0225427	0.0457734	0.0286802	0.0364454								7	-107.045	-0.0443243		7	-7.07942	0.00540541	310.517			-43	0.0224745	0.00867238	0.0198066	-0.0407232	0.0726182	0.0384561
	7.5	-25.2551	-0.0263101		7.5	2.0084	0.0949733	386.528			-42.5	0.0294965	0.0469921	0.0302608	-0.0287662	-0.0289236	0.039584		-42.5	0.0260528	0.0378881	0.0102092	0.0418786	0.0260837	0.0319015								7.5	-16.1672	-0.04		7.5	-22.6585	-0.0118919	312.6			-42.5	0.0244219	-0.00495935	0.0146135	-0.0413723	0.0680743	0.0352104
	8	-9.67594	-0.0160428		8	-7.07942	0.0968984	384.191			-42	0.0249526	0.0430974	0.0289626	-0.0274679	-0.0217832	0.0337418		-42	0.0247546	0.0352916	-0.00342254	0.0392821	0.0241363	0.0247611								8	7.85057	-0.0349549		8	-18.1146	-0.0335135	293.665			-42	0.0257202	-0.023135	0.0029292	-0.0361793	0.0589864	0.0339122
	8.5	-15.5181	-3.22237e-09		8.5	-29.799	0.091123	380.328			-41.5	0.0204086	0.04115	0.0224713	-0.0248714	-0.0211341	0.029847		-41.5	0.0228072	0.0326951	-0.0190017	0.0295452	0.0195924	0.0215154								8.5	0.061011	-0.0205405		8.5	-23.3077	-0.0551351	295.976			-41.5	0.0218254	-0.0361176	-0.00940427	-0.0290388	0.0531443	0.0306665
	9	-23.3077	0.0166844		9	-6.43029	0.0847058	365.788			-41	0.017163	0.0430974	0.00429562	-0.0170819	-0.0237306	0.0266014		-41	0.0202107	0.0281511	-0.0352299	0.0217556	0.00985542	0.0254102								9	-14.2198	0.00324325		9	-4.4829	-0.0767568	298.287			-41	0.0114393	-0.0491002	-0.0145973	-0.0329336	0.0524951	0.0202804
	9.5	-13.5707	0.037861		9.5	-9.67594	0.082139	359.621			-40.5	0.01197	0.0437465	-0.0158274	-0.00799404	-0.0321693	0.0253031		-40.5	0.0156668	0.0151685	-0.0501599	0.0159134	-0.0011798	0.0280067								9.5	-20.062	0.0313513		9.5	-7.07942	-0.0954955	300.987			-40.5	-0.00219244	-0.0640302	-0.017843	-0.0530566	0.0498986	0.0105435
	10	-18.7638	0.0571123		10	-12.9216	0.0802139	352.708			-40	0.00937344	0.0417991	-0.0320557	0.00174292	-0.0321693	0.0220574		-40	0.00657893	0.00932638	-0.060546	0.013966	-0.0135133	0.0234628								10	-31.7464	0.0536936		10	-14.2198	-0.100541	277.638			-40	-0.0177716	-0.0796093	-0.0204395	-0.0790218	0.0447056	0.00859611
	10.5	-26.5533	0.0699466		10.5	-15.5181	0.0750802	346.509			-39.5	0.0100226	0.0353078	-0.0443891	0.012129	-0.0321693	0.014917		-39.5	-0.00640367	0.00348421	-0.0741777	0.0133169	-0.0401276	0.0202172								10.5	-31.0972	0.0645046		10.5	-12.2725	-0.0918919	276.781			-39.5	-0.0327015	-0.0919428	-0.0223869	-0.0971975	0.036916	0.01314
	11	-16.1672	0.0750802		11	-18.1146	0.0725134	341.445			-39	0.0106717	0.02622	-0.0554243	0.0205677	-0.0334675	0.00712745		-39	-0.0154915	-0.00625274	-0.090406	0.0126678	-0.0706367	0.0176206								11	-9.67594	0.0688289		11	-28.5007	-0.070991	275.035			-39	-0.0456841	-0.0945393	-0.0262817	-0.0978466	0.0343195	0.0163857
	11.5	-14.869	0.0782887		11.5	-24.6059	0.0725134	341.283			-38.5	0.00482953	0.0171322	-0.0632139	0.0238133	-0.0386606	0.000636149		-38.5	-0.027825	-0.0166388	-0.100792	0.0172117	-0.0914089	0.0130767								11.5	-17.4655	0.0745946		11.5	-10.9742	-0.0385585	271.666			-38.5	-0.054772	-0.0919428	-0.0418608	-0.0731797	0.0330212	0.0118418
	12	-16.8164	0.0770053		12	-17.4655	0.0718716	341.445			-38	-0.00815307	0.0145356	-0.0671087	0.0244625	-0.040608	-0.0129956		-38	-0.0388602	-0.0315688	-0.104687	0.0165626	-0.103093	0.00528717								12	-21.3603	0.0724325		12	-20.062	-0.000360358	433.105			-38	-0.0632107	-0.0841532	-0.0658786	-0.0374775	0.0297756	-0.00243911
	12.5	-18.1146	0.0750802		12.5	-14.869	0.0680214	332.26			-37.5	-0.0165918	0.00934261	-0.0606174	0.0238133	-0.0341167	-0.0181886		-37.5	-0.047948	-0.0471479	-0.0981955	0.0120186	-0.110234	-0.0025024								12.5	-20.062	0.0645046		12.5	-11.6233	0.0327928	428.847			-37.5	-0.0684037	-0.0757145	-0.0970368	-0.00502102	0.0200386	-0.0141234
	13	-10.3251	0.0744385		13	-15.5181	0.0635294	322.686			-37	-0.0308726	0.00414957	-0.0521787	0.0212168	-0.0191867	-0.0207851		-37	-0.0563867	-0.0614288	-0.0852129	0.00487821	-0.11283	-0.0089937								13	-16.1672	0.0601802		13	-18.7638	0.0536936	426.198			-37	-0.0729476	-0.0672758	-0.108721	0.024839	0.0109508	-0.0154217
	13.5	-7.72855	0.0750802		13.5	-6.43029	0.0583957	313.241			-36.5	-0.0438552	-0.00234174	-0.0417926	0.0179712	0.000287242	-0.0175395		-36.5	-0.0615797	-0.0809027	-0.0696338	0.000334301	-0.107637	-0.0187306								13.5	-5.78116	0.0637838		13.5	-18.7638	0.0645046	424.478			-36.5	-0.0761933	-0.0588371	-0.0957386	0.050155	0.00575779	-0.0115269
	14	-9.02681	0.0737968		14	-23.3077	0.0545454	303.634			-36	-0.0561887	-0.0120787	-0.0346522	0.0153746	0.0171646	-0.00845167		-36	-0.0667728	-0.104271	-0.0482125	-0.00550787	-0.103742	-0.0330115								14	-34.3429	0.0731532		14	-25.9042	0.0688289	454.306			-36	-0.0813863	-0.043258	-0.073019	0.0696289	0.00251213	-0.0232113
	14.5	-10.3251	0.0718716		14.5	-7.72855	0.0468449	290.554			-35.5	-0.0665748	-0.0244122	-0.0294591	0.00953248	0.0223577	-0.000662111		-35.5	-0.0745623	-0.12764	-0.0267912	-0.0204379	-0.0959528	-0.0459941								14.5	-10.3251	0.078919		14.5	-13.5707	0.0724325	454.344			-35.5	-0.0891759	-0.0140472	-0.0587382	0.0741728	-0.00333004	-0.0361939
	15	-16.8164	0.0693048		15	-16.8164	0.0352942	269.197			-35	-0.0711187	-0.0322017	-0.0190731	0.00174292	0.019112	0.00323267		-35	-0.0849484	-0.13543	-0.00991384	-0.0366661	-0.0784263	-0.0589767								15	-22.0094	0.0774775		15	-18.1146	0.0745946	453.851			-35	-0.0943689	0.0229532	-0.0451064	0.0689798	-0.0156635	-0.0413869
	15.5	-27.2024	0.0718716		15.5	-17.4655	0.015401	236.319			-34.5	-0.0717678	-0.0419387	-0.00673959	-0.000853608	0.0119716	0.00518006		-34.5	-0.097931	-0.121798	0.00956006	-0.0483505	-0.0492154	-0.0680645								15.5	-14.869	0.070991		15.5	-10.9742	0.0781982	453.591			-34.5	-0.0833337	0.056708	-0.0236851	0.059892	-0.0338391	-0.0361939
	16	-19.4129	0.0699466		16	-12.9216	-0.00449198	194.937			-34	-0.0711187	-0.0451843	0.00299736	0.00109378	0.0113224	0.00323267		-34	-0.0998784	-0.0880431	0.0309814	-0.0574383	-0.0200046	-0.0778015								16	-5.13203	0.0616217		16	-18.1146	0.0803604	357.617			-34	-0.0515263	0.0820241	-0.00161471	0.0527515	-0.0507165	-0.0284043
	16.5	-29.799	0.0660962		16.5	-9.67594	-0.0352942	143.785			-33.5	-0.0685222	-0.0523247	0.0107869	0.00433944	0.0171646	0.00258354		-33.5	-0.0855975	-0.0497445	0.0465605	-0.0717191	0.0072589	-0.0894858								16.5	-12.9216	0.0515315		16.5	-9.02681	0.078919	357.533			-33.5	-0.0132276	0.0956558	0.0211048	0.0508042	-0.0656465	-0.027106
	17	-14.869	0.0693048		17	-9.02681	-0.0750802	64.8187			-33	-0.0646274	-0.06336	0.0205239	-0.002801	0.0236559	-0.000662111		-33	-0.0609306	-0.0237793	0.0575957	-0.0918422	0.0260837	-0.0959771								17	-9.67594	0.0407207		17	-4.4829	0.0774775	357.799			-33	0.0211762	0.103445	0.0334383	0.0553481	-0.0760326	-0.0284043
	17.5	-0.588119	0.0660962		17.5	-18.7638	-0.107166	-4.93034			-32.5	-0.0542413	-0.0705004	0.0322082	-0.0164327	0.0249542	-0.00845167		-32.5	-0.0395093	0.000238554	0.0679818	-0.105474	0.0410137	-0.0927315								17.5	-18.1146	0.0335135		17.5	-14.2198	0.0781982	357.682			-32.5	0.0438958	0.0995506	0.0360348	0.0553481	-0.0799274	-0.0297026
	18	-22.0094	0.0609625		18	-7.72855	-0.12	-42.7422			-32	-0.0354165	-0.068553	0.0419452	-0.0209766	0.0223577	-0.0103991		-32	-0.0213337	0.0249055	0.0686309	-0.10807	0.0533471	-0.0790997								18	-22.6585	0.0327928		18	-11.6233	0.0767568	342.434			-32	0.0523345	0.0846206	0.0392805	0.0546989	-0.0818748	-0.0258078
	18.5	-22.6585	0.057754		18.5	-7.72855	-0.111658	-34.8552			-31.5	-0.0159426	-0.0607634	0.0529804	-0.0183801	0.0171646	-0.00455689		-31.5	-0.00575454	0.0443794	0.0634379	-0.10093	0.0637332	-0.0550819								18.5	-10.3251	0.0349549		18.5	-5.78116	0.0731532	342.882			-31.5	0.0568784	0.0729362	0.0412279	0.0527515	-0.07798	-0.0180182
	19	-5.13203	0.0539038		19	-12.9216	-0.0885562	3.18379			-31	0.000934746	-0.0562195	0.0601208	-0.0151345	0.0171646	0.00518006		-31	0.011772	0.057362	0.0621396	-0.0788596	0.0721719	-0.0245728								19	-14.869	0.0363964		19	-25.9042	0.0688289	343.142			-31	0.064668	0.0644976	0.0431753	0.0488568	-0.0662956	-0.0134743
	19.5	-9.02681	0.0442781		19.5	-15.5181	-0.0571123	64.0397			-30.5	0.0152156	-0.0640091	0.0646647	-0.0144853	0.0178137	0.0110222		-30.5	0.0351407	0.0651516	0.0569466	-0.0580874	0.0760667	0.00398891								19.5	0.061011	0.032072		19.5	-7.72855	0.0565766	344.524			-30.5	0.0692119	0.0560589	0.0483683	0.0410672	-0.0448744	-0.0115269
	20	-9.67594	0.0263101		20	-12.9216	-0.0346524	115.126			-30	0.0275491	-0.0763426	0.0601208	-0.0138362	0.0178137	0.00972397		-30	0.0546146	0.0696955	0.0537009	-0.0386135	0.0747684	0.0273576								20	-23.3077	0.0299099		20	-6.43029	0.045045	319.767			-30	0.0705101	0.0489184	0.056807	0.035225	-0.0234531	-0.00893041
	20.5	-16.8164	0.00705882		20.5	-11.6233	-0.0173262	150.342			-29.5	0.0327421	-0.0659565	0.0516821	-0.0138362	0.00742767	0.0038818		-29.5	0.0656498	0.0755376	0.0524026	-0.0152448	0.0682771	0.0455332								20.5	-3.83377	0.0248648		20.5	-22.0094	0.04	320.643			-29.5	0.0737558	0.0450237	0.0594035	0.030032	-0.00657569	-0.0043865
	21	-16.1672	-0.00834224		21	-7.72855	0.00192514	188.251			-29	0.032093	-0.0393421	0.0464891	-0.0138362	-0.0049058	0.00518006		-29	0.0682463	0.0800815	0.0498061	0.00552734	0.0591893	0.0565684								21	-13.5707	0.0190991		21	-7.07942	0.0335135	321.74			-29	0.0731066	0.0450237	0.0581052	0.0235407	-0.000733518	0.00340307
	21.5	-91.4663	-0.0160428		21.5	0.061011	0.0314438	237.617			-28.5	0.0307947	-0.0107804	0.0458399	-0.0157836	-0.0120462	0.00453093		-28.5	0.0675972	0.0807307	0.043964	0.0224047	0.0520489	0.0611123								21.5	-14.2198	0.00612613		21.5	-16.8164	0.0227027	322.415			-28.5	0.0672645	0.0424271	0.0561579	0.0215933	0.00186301	0.0118418
	22	-25.9042	-0.019893		22	-5.13203	0.0596791	299.09			-28	0.0346895	0.00999173	0.0490856	-0.0268188	-0.0120462	0.00582919		-28	0.0637024	0.0748885	0.03942	0.0353873	0.0539963	0.0617615								22	-14.869	-0.00756756		22	-10.9742	0.0111712	313.113			-28	0.0614223	0.041778	0.051614	0.0196459	0.0083543	0.0183331
	22.5	1.35927	-0.0269519		22.5	-20.7111	0.0840642	351.15			-27.5	0.0333912	0.0268691	0.0497347	-0.0398014	-0.00166015	0.0110222		-27.5	0.0656498	0.0651516	0.0361744	0.0412295	0.0585402	0.0630597								22.5	-39.5359	-0.0133333		22.5	-24.6059	0.00180181	313.898			-27.5	0.0568784	0.0385324	0.0438244	0.0202951	0.0161439	0.0202804
	23	-4.4829	-0.0365776		23	-16.1672	0.0968984	382.828			-27	0.0275491	0.0405008	0.0464891	-0.047591	0.00677854	0.0162153		-27	0.0598076	0.057362	0.0303322	0.043826	0.0604876	0.064358								23	-12.2725	-0.0169369		23	-19.4129	-0.00396396	315.002			-27	0.0536327	0.0339885	0.0360348	0.0183477	0.0206878	0.0215787
	23.5	-28.5007	-0.0391444		23.5	-31.7464	0.100107	395.258			-26.5	0.0249526	0.0528343	0.0367521	-0.052784	0.00677854	0.0194609		-26.5	0.0533163	0.0541164	0.0264374	0.0444751	0.0572419	0.0630597								23.5	-19.4129	-0.0198198		23.5	6.55231	-0.0133333	316.294			-26.5	0.0510362	0.0294445	0.0321401	0.00796158	0.0226352	0.0222278
	24	-9.67594	-0.033369		24	-19.4129	0.0949733	389.092			-26	0.0288473	0.0573782	0.0302608	-0.0521349	-0.00101102	0.0188118		-26	0.0507198	0.0495724	0.0296831	0.0483699	0.0520489	0.0624106								24	-16.1672	-0.021982		24	-25.9042	-0.032072	314.463			-26	0.0484397	0.0261989	0.0301927	-0.00631928	0.0271791	0.02807
	24.5	-12.9216	-0.0250267		24.5	-16.1672	0.091123	382.341			-25.5	0.037286	0.0573782	0.0289626	-0.0495384	-0.0126954	0.0116714		-25.5	0.0487724	0.0398355	0.0316305	0.0509664	0.0481541	0.0604632								24.5	-25.9042	-0.0263063		24.5	-14.869	-0.0529729	317.443			-25.5	0.0477906	0.0197076	0.0230522	-0.019951	0.0323721	0.0313157
	25	-18.1146	-0.0173262		25	-16.1672	0.0904813	376.531			-25	0.0411808	0.0580274	0.0315591	-0.0469418	-0.0191867	-1.29826e-05		-25	0.0435793	0.0339933	0.0277357	0.0516156	0.0449084	0.054621								25	-12.9216	-0.0436036		25	-15.5181	-0.0652253	319.15			-25	0.0451941	0.00932151	0.0178592	-0.0264423	0.0382143	0.0326139
	25.5	-13.5707	-0.0128342		25.5	-14.869	0.0885562	371.176			-24.5	0.0411808	0.0567291	0.0315591	-0.0430471	-0.0204849	-0.0123465		-24.5	0.0409828	0.0352916	0.0134548	0.0496682	0.0423119	0.0513754								25.5	-22.0094	-0.0702703		25.5	-11.6233	-0.0753154	320.429			-24.5	0.0412993	-0.00106457	0.0139644	-0.0303371	0.0388634	0.02807
	26	-5.13203	-0.00770053		26	-13.5707	0.086631	372.247			-24	0.0385843	0.0521852	0.0205239	-0.0352575	-0.0198358	-0.0175395		-24	0.0409828	0.037239	-0.0047208	0.0425278	0.0403645	0.0552702								26	8.4997	-0.104865		26	-14.2198	-0.078919	294.704			-24	0.0387028	-0.008205	0.0100696	-0.0368284	0.0388634	0.0235261
	26.5	-18.7638	-0.00320856		26.5	-22.6585	0.0840642	365.204			-23.5	0.0314439	0.0430974	0.00754127	-0.0170819	-0.0230814	-0.0227325		-23.5	0.0403337	0.0365898	-0.0190017	0.0392821	0.0351715	0.0572176								26.5	-18.7638	-0.117838		26.5	-22.0094	-0.0695496	294.074			-23.5	0.0341588	-0.008205	0.0126662	-0.0491619	0.0362669	0.022877
	27	-9.67594	0.00770053		27	-11.6233	0.0789305	357.706			-23	0.0236543	0.0353078	-0.00284481	0.0036903	-0.0328184	-0.0253291		-23	0.0364389	0.0294494	-0.030686	0.0399312	0.0299785	0.0565684								27	-29.1498	-0.103423		27	-7.72855	-0.0536936	292.438			-23	0.0309132	-0.008205	0.0126662	-0.0621445	0.0291265	0.0215787
	27.5	-33.6938	0.0263101		27.5	-13.5707	0.0744385	346.119			-22.5	0.0191104	0.0275182	-0.00609046	0.0134273	-0.0373623	-0.0253291		-22.5	0.031895	0.0190633	-0.0384756	0.0418786	0.0234871	0.0526737								27.5	-7.72855	-0.0781982		27.5	-20.7111	-0.0414414	291.062			-22.5	0.0309132	-0.0140472	0.00877137	-0.0712323	0.021986	0.0209296
	28	-10.9742	0.0468449		28	-18.7638	0.07123	337.551			-22	0.0165139	0.0255709	-0.0106344	0.0186203	-0.040608	-0.0240308		-22	0.026702	0.00737899	-0.0501599	0.0412295	0.00790803	0.0481297								28	-23.9568	-0.0623423		28	-7.72855	-0.027027	400.441			-22	0.0289658	-0.0257315	0.0029292	-0.0712323	0.0226352	0.0118418
	28.5	-14.869	0.0660962		28.5	-17.4655	0.0673796	332.877			-21.5	0.01197	0.0275182	-0.0210205	0.0205677	-0.0386606	-0.0227325		-21.5	0.0228072	-0.00625274	-0.0618442	0.0321417	-0.00896935	0.044235								28.5	-20.062	-0.0472072		28.5	-9.02681	-0.00972972	398.48			-21.5	0.0218254	-0.0426089	-0.0035621	-0.0692849	0.0206878	-0.00178998
	29	-31.0972	0.0789305		29	-24.6059	0.0654546	325.639			-21	0.00807518	0.0294656	-0.04374	0.0199186	-0.0341167	-0.020136		-21	0.0150176	-0.0309197	-0.0761251	0.0243521	-0.0193554	0.0370945								29	1.35927	-0.0234234		29	-20.062	0.00540541	396.494			-21	0.0120884	-0.0685741	-0.0107025	-0.0627936	0.0141965	-0.0173691
	29.5	-19.4129	0.0872728		29.5	-20.7111	0.0648128	322.426			-20.5	0.00742605	0.0236235	-0.0703543	0.017322	-0.0243797	-0.0207851		-20.5	0.00333328	-0.0666218	-0.0839147	0.0204573	-0.0245485	0.0273576								29.5	-27.2024	0.00108108		29.5	-7.72855	0.0176576	394.942			-20.5	-0.00413983	-0.0906445	-0.0184921	-0.0504601	0.00381039	-0.0303517
	30	-14.869	0.0943315		30	-5.78116	0.0616043	319.148			-20	0.00612779	0.0132374	-0.0930739	0.0153746	-0.00944971	-0.0331186		-20	-0.0167897	-0.102324	-0.0923534	0.0198082	-0.032338	0.0163224								30	-10.3251	0.0263063		30	-19.4129	0.0248648	415.384			-20	-0.0216663	-0.0964867	-0.0314747	-0.0381267	-0.0046283	-0.0407378
	30.5	-12.9216	0.100107		30.5	-11.6233	0.0609625	315.61			-19.5	-0.000363514	0.0106409	-0.100214	0.0179712	0.00223463	-0.0473995		-19.5	-0.0369128	-0.126342	-0.105985	0.0211065	-0.0446715	0.00398891								30.5	-9.02681	0.04		30.5	-0.588119	0.0342342	414.786			-19.5	-0.0327015	-0.0912936	-0.0444573	-0.0316354	-0.0117687	-0.0472291
	31	-1.88638	0.102674		31	-15.5181	0.057754	310.255			-19	-0.0088022	0.00804435	-0.0911265	0.0212168	0.0106733	-0.0538908		-19	-0.068071	-0.134131	-0.113126	0.0204573	-0.0654437	-0.010292								31	-16.8164	0.0428828		31	-13.5707	0.04	413.657			-19	-0.0437368	-0.093241	-0.0567908	-0.029688	-0.0228039	-0.0472291
	31.5	-16.1672	0.103957		31.5	-27.2024	0.0564706	306.263			-18.5	-0.0172409	0.00674609	-0.0729509	0.0218659	0.0171646	-0.0532416		-18.5	-0.108317	-0.132833	-0.103389	0.0165626	-0.0907597	-0.0310641								31.5	-8.37768	0.0464864		31.5	0.710141	0.0443243	413.04			-18.5	-0.0515263	-0.0964867	-0.0587382	-0.019951	-0.03319	-0.0511239
	32	-20.062	0.103957		32	-20.7111	0.0513368	299.739			-18	-0.0289252	0.00220217	-0.0606174	0.0218659	0.0249542	-0.0538908		-18	-0.140774	-0.12764	-0.0748268	0.0107204	-0.116725	-0.0609241								32	-8.37768	0.0486486		32	-18.7638	0.0464864	377.403			-18	-0.0521754	-0.093241	-0.0515977	-0.0024245	-0.0377339	-0.0563169
	32.5	-27.2024	0.0994652		32.5	-5.78116	0.0442781	286.432			-17.5	-0.0535922	-0.00948217	-0.0573717	0.0225151	0.0333929	-0.0610312		-17.5	-0.153756	-0.117254	-0.0404229	0.00293082	-0.136199	-0.0901349								32.5	-0.588119	0.0508108		32.5	-9.67594	0.0464864	377.396			-17.5	-0.0521754	-0.0906445	-0.0483521	0.0196459	-0.0299444	-0.0563169
	33	-1.23725	0.0924064		33	-13.5707	0.0263101	258.681			-17	-0.0704696	-0.0179209	-0.0580209	0.0257607	0.0385859	-0.0616803		-17	-0.145317	-0.102324	-0.0125104	-0.00745526	-0.139444	-0.112855								33	-26.5533	0.0565766		33	-16.8164	0.0407207	377.669			-17	-0.0606141	-0.0925919	-0.0548434	0.0404181	-0.0176109	-0.0582643
	33.5	-16.8164	0.0885562		33.5	-13.5707	0.00513368	217.169			-16.5	-0.0717678	-0.0289561	-0.0495822	0.0277081	0.0411824	-0.0538908		-16.5	-0.121949	-0.0867449	0.00891093	-0.0256309	-0.127111	-0.128434								33.5	0.061011	0.065946		33.5	-25.9042	0.0313513	379.019			-16.5	-0.0703511	-0.082855	-0.058089	0.0540498	-0.0124179	-0.066703
	34	-20.7111	0.0840642		34	-20.062	-0.0166844	174.684			-16	-0.0737152	-0.0477808	-0.0301083	0.0238133	0.0385859	-0.0383117		-16	-0.0901414	-0.0627271	0.0205953	-0.0528944	-0.101795	-0.14596								34	-22.6585	0.0688289		34	-27.2024	0.0234234	331.801			-16	-0.0761933	-0.058188	-0.058089	0.0644359	-0.00787395	-0.0725452
	34.5	-18.7638	0.0776471		34.5	-20.7111	-0.0327272	140.248			-15.5	-0.0750135	-0.0705004	-0.00933611	0.0179712	0.0281998	-0.0220834		-15.5	-0.0674219	-0.027674	0.0277357	-0.0788596	-0.0738824	-0.149206								34.5	-16.1672	0.0673874		34.5	-23.9568	0.0198198	332.451			-15.5	-0.0742459	-0.0224859	-0.0548434	0.0722255	-0.0137161	-0.0680012
	35	-5.78116	0.0737968		35	-10.3251	-0.0494118	109.576			-15	-0.0704696	-0.0893252	0.00559388	0.00953248	0.0223577	-0.00520602		-15	-0.0498954	0.0119229	0.0329287	-0.10093	-0.0440224	-0.136223								35	-8.37768	0.0652253		35	-18.1146	0.0190991	332.606			-15	-0.0684037	0.00867238	-0.0386151	0.0741728	-0.0254005	-0.0439834
	35.5	-10.3251	0.0718716		35.5	-93.4137	-0.0744385	61.8651			-14.5	-0.06268	-0.0990621	0.0120852	0.00433944	0.0243051	0.0103731		-14.5	-0.0304215	0.0404846	0.0420166	-0.117807	-0.0148115	-0.114802								35.5	-18.7638	0.0601802		35.5	-26.5533	0.0154955	332.983			-14.5	-0.0625615	0.0313919	-0.0152464	0.0702781	-0.03319	-0.0160708
	36	-15.5181	0.0737968		36	-3.18464	-0.0968984	9.86983			-14	-0.0587852	-0.0925708	0.0153308	0.00239204	0.0249542	0.0240048		-14	-0.000561499	0.0567129	0.049157	-0.124948	0.0124519	-0.0881876								36	-12.2725	0.0515315		36	-15.5181	0.00540541	332.457			-14	-0.0528246	0.0469711	0.00747311	0.0611902	-0.0325409	0.00924523
	36.5	-12.2725	0.0744385		36.5	-10.9742	-0.0975401	-4.37858			-13.5	-0.0483991	-0.073746	0.0153308	0.00239204	0.0275507	0.0337418		-13.5	0.0280002	0.062555	0.0537009	-0.115211	0.0319258	-0.0589767								36.5	-15.5181	0.0428828		36.5	-17.4655	-0.00108108	333.294			-13.5	-0.0372455	0.0521641	0.026947	0.0534007	-0.0228039	0.0306665
	37	-7.72855	0.0725134		37	-18.7638	-0.0834224	18.2111			-13	-0.0321709	-0.0529739	0.01598	0.000444652	0.0307963	0.0428296		-13	0.0526672	0.0677481	0.0562974	-0.0853509	0.0462067	-0.0232746								37	-6.43029	0.0385585		37	-16.8164	-0.00612612	333.846			-13	-0.0229646	0.0508658	0.0412279	0.0482076	-0.00852308	0.0449474
	37.5	-20.062	0.0660962		37.5	-16.1672	-0.057754	65.8248			-12.5	-0.0152935	-0.0380439	0.0218221	-0.00215187	0.0249542	0.0486718		-12.5	0.0656498	0.0742394	0.0537009	-0.0451048	0.0565928	0.00983107								37.5	-23.9568	0.0363964		37.5	-0.588119	-0.0111712	334.69			-12.5	-0.00738548	0.0476202	0.0490174	0.0495059	0.00445953	0.0514387
	38	-7.72855	0.0571123		38	-10.3251	-0.033369	119.086			-12	0.00612779	-0.0354474	0.0315591	-0.00539752	0.0126207	0.0538648		-12	0.0688954	0.0820289	0.0498061	-0.0119992	0.0611367	0.0364454								38	-14.2198	0.0284684		38	-29.1498	-0.0212612	327.777			-12	0.0030006	0.0450237	0.0522631	0.0488568	0.00705604	0.0520878
	38.5	-25.9042	0.0481283		38.5	-5.13203	-0.015401	154.431			-11.5	0.0256017	-0.038693	0.0386995	-0.00734491	0.00223463	0.0564613		-11.5	0.0637024	0.087222	0.0459113	0.00812386	0.0617858	0.0533228								38.5	-24.6059	0.0227027		38.5	-6.43029	-0.0349549	329.406			-11.5	0.0114393	0.0437254	0.051614	0.0417163	0.00316127	0.0520878
	39	1.35927	0.0455615		39	-7.07942	0.000641708	182.473			-11	0.0385843	-0.0335	0.0380504	-0.0092923	-0.00101102	0.0564613		-11	0.0598076	0.0898185	0.0420166	0.0146152	0.057891	0.0676036								39	-18.1146	0.0183784		39	-13.5707	-0.0457657	330.938			-11	0.0218254	0.0437254	0.051614	0.0378216	-0.00268091	0.0527369
	39.5	-1.23725	0.0404278		39.5	-27.8516	0.0192514	225.121			-10.5	0.0437773	-0.0257104	0.0374013	-0.0138362	0.00223463	0.0551631		-10.5	0.0591585	0.0885202	0.03942	0.0178608	0.0546454	0.079288								39.5	-19.4129	0.014054		39.5	-12.2725	-0.0508108	331.659			-10.5	0.0322115	0.0404797	0.051614	0.0332777	-0.00333004	0.0546843
	40	-20.7111	0.0352942		40	-15.5181	0.0410695	266.471			-10	0.047023	-0.0179209	0.0393486	-0.0151345	0.00093637	0.0538648		-10	0.0572111	0.0813798	0.0296831	0.023703	0.0481541	0.0851302								40	-22.0094	0.0169369		40	-25.9042	-0.0493693	316.281			-10	0.0380536	0.0378832	0.0490174	0.0306811	0.000564742	0.0553335
	40.5	-1.88638	0.028877		40.5	-20.7111	0.0564706	299.706			-9.5	0.0457247	-0.00818391	0.0380504	-0.0170819	-0.00620406	0.0480226		-9.5	0.0552637	0.0755376	0.0218935	0.0301943	0.0410137	0.0818845								40.5	-25.2551	0.0169369		40.5	-24.6059	-0.0479279	316.054			-9.5	0.0393519	0.0326902	0.0451226	0.0254881	0.00705604	0.0527369
	41	-9.02681	0.0192514		41	-11.6233	0.0705882	324.86			-9	0.0437773	0.00414957	0.0367521	-0.0183801	-0.0152919	0.0421805		-9	0.0526672	0.0690463	0.0160514	0.0392821	0.0364697	0.0747441								41	-20.7111	0.0126126		41	-27.8516	-0.0508108	316.365			-9	0.040001	0.0281463	0.0405787	0.015102	0.0109508	0.0540352
	41.5	-9.67594	0.00705882		41.5	-17.4655	0.086631	360.14			-8.5	0.0431282	0.0151848	0.0399978	-0.0216258	-0.0198358	0.0369874		-8.5	0.0474741	0.0612568	0.014104	0.0425278	0.0319258	0.0669545								41.5	-26.5533	0.00612613		41.5	-17.4655	-0.0522522	316.573			-8.5	0.0412993	0.0236024	0.0334383	0.00211941	0.00900343	0.0559826
	42	-25.2551	-0.000641714		42	-2.53551	0.103316	392.629			-8	0.0437773	0.0249217	0.0445417	-0.0242223	-0.0211341	0.03504		-8	0.0429302	0.0534672	0.0134548	0.0425278	0.0247854	0.0598141								42	2.0084	-0.00108108		42	-29.1498	-0.0536936	357.04			-8	0.040001	0.0197076	0.0301927	-0.0102141	0.00251213	0.0527369
	42.5	-9.02681	-0.0102674		42.5	-10.9742	0.114225	420.51			-7.5	0.0424791	0.0346587	0.0458399	-0.0274679	-0.0263271	0.0330926		-7.5	0.0396846	0.0456777	0.0128057	0.0399312	0.0215398	0.0578667								42.5	-20.7111	-0.009009		42.5	-24.6059	-0.0493693	356.806			-7.5	0.0374045	0.0210058	0.0314909	-0.0141088	0.000564742	0.048193
	43	-18.1146	-0.0134759		43	-10.3251	0.117433	433.784			-7	0.0405317	0.0417991	0.0399978	-0.0248714	-0.0321693	0.0337418		-7	0.0357898	0.0411337	0.0173496	0.0373347	0.0254345	0.0539719								43	-33.0446	-0.0176576		43	-24.6059	-0.0378378	355.676			-7	0.0354571	0.0229532	0.0308418	-0.0160562	-0.00268091	0.0417017
	43.5	-18.7638	-0.0205348		43.5	-8.37768	0.114225	428.299			-6.5	0.0379352	0.046343	0.0335065	-0.0209766	-0.0347658	0.0343909		-6.5	0.0338424	0.0346424	0.0167005	0.0360365	0.0280311	0.0520245								43.5	-11.6233	-0.032072		43.5	-17.4655	-0.0234234	353.937			-6.5	0.0328606	0.0223041	0.0295435	-0.0134597	-0.00982134	0.0371578
	44	-18.7638	-0.0314438		44	-9.02681	0.107166	416.323			-6	0.0405317	0.0469921	0.0270152	-0.0222749	-0.0315201	0.0304961		-6	0.0331933	0.0313968	0.0121566	0.0379838	0.0234871	0.0481297								44	-11.6233	-0.0464864		44	-29.799	-0.00612612	393.878			-6	0.0263693	0.0171111	0.0243505	-0.0128106	-0.0117687	0.0352104
	44.5	-14.2198	-0.0385027		44.5	-21.3603	0.0981818	397.336			-5.5	0.0385843	0.0430974	0.0172782	-0.0255205	-0.0295727	0.0253031		-5.5	0.0299476	0.0307477	0.00501615	0.0425278	0.0202415	0.0448841								44.5	-23.3077	-0.0601801		44.5	-5.78116	0.0111712	391.937			-5.5	0.0224745	0.00867238	0.0172101	-0.0270914	-0.0104705	0.0358596
	45	-10.9742	-0.0365776		45	-14.869	0.0891978	381.302			-5	0.0346895	0.0372552	0.00624301	-0.0307136	-0.0289236	0.0227066		-5	0.0292985	0.0313968	0.000472241	0.043826	0.017645	0.0409893								45	-15.5181	-0.0623423		45	-20.062	0.0263063	389.71			-5	0.0172815	-0.00431022	0.0152627	-0.055004	-0.00657569	0.0352104
	45.5	-16.1672	-0.028877		45.5	-13.5707	0.0853476	368.384			-4.5	0.0379352	0.0340095	-0.00154655	-0.0372049	-0.0204849	0.0162153		-4.5	0.0260528	0.0320459	-0.00536993	0.0405804	0.0131011	0.0403402								45.5	-9.67594	-0.0544144		45.5	-13.5707	0.0464864	387.782			-4.5	0.0166323	-0.0185911	0.0146135	-0.0809692	-0.00333004	0.0352104
	46	-18.7638	-0.0243851		46	-7.72855	0.0840642	360.465			-4	0.0346895	0.0346587	-0.00349394	-0.0339592	-0.00880058	0.00582919		-4	0.0247546	0.027502	-0.0202999	0.0353873	0.00531151	0.0364454								46	-25.2551	-0.0508108		46	-3.18464	0.0572974	424.64			-4	0.019878	-0.0354685	0.0107188	-0.0913553	-0.00203178	0.0293683
	46.5	-24.6059	-0.0320856		46.5	-4.4829	0.0808556	360.335			-3.5	0.0294965	0.0346587	-0.00609046	-0.0216258	-0.00036189	-0.00650428		-3.5	0.0195615	0.0151685	-0.0365282	0.0301943	-0.00247806	0.0306032								46.5	-20.7111	-0.058018		46.5	-16.1672	0.0623424	423.965			-3.5	0.0159832	-0.0542932	0.00487659	-0.0868114	-0.00203178	0.0202804
	47	-14.869	-0.0442781		47	-11.6233	0.0757219	352.643			-3	0.0262508	0.0294656	-0.00868698	-0.00215187	0.00353289	-0.0168904		-3	0.0124211	0.000238554	-0.0482125	0.0275978	-0.00896935	0.0280067								47	-18.1146	-0.0616216		47	-9.02681	0.0645046	423.167			-3	0.00559712	-0.0724689	-0.0035621	-0.0770745	-0.00787395	0.0124909
	47.5	-23.9568	-0.0340106		47.5	-27.8516	0.0718716	345.016			-2.5	0.022356	0.0223252	-0.0145292	0.0153746	0.00612941	-0.0279256		-2.5	-0.00575454	-0.0159897	-0.0573003	0.0230539	-0.0187063	0.0254102								47.5	-22.0094	-0.0616216		47.5	-25.2551	0.0616217	423.225			-2.5	-0.00868374	-0.0841532	-0.0113517	-0.0705832	-0.0202074	0.000806542
	48	-17.4655	-0.00770053		48	-10.9742	0.068663	334.11			-2	0.0126191	0.0197287	-0.0229678	0.0283572	0.00937506	-0.0383117		-2	-0.0271758	-0.0400075	-0.0715812	0.0172117	-0.0329872	0.0163224								48	-21.3603	-0.058018		48	-11.6233	0.0551352	360.707			-2	-0.0184207	-0.0861006	-0.017843	-0.0744779	-0.0370848	-0.01672
	48.5	-14.2198	0.0205348		48.5	-24.6059	0.0660962	331.319			-1.5	-0.00555655	0.0229743	-0.0340031	0.0309538	0.0106733	-0.0441538		-1.5	-0.0492462	-0.0789553	-0.0917042	0.0107204	-0.0459698	0.00528717								48.5	-10.9742	-0.04		48.5	-24.6059	0.0472072	361.986			-1.5	-0.0223155	-0.0802584	-0.0223869	-0.0803201	-0.0539622	-0.0329482
	49	-18.1146	0.0410695		49	-19.4129	0.0635294	327.781			-1	-0.0250305	0.0301148	-0.0443891	0.0290064	0.0113224	-0.0435047		-1	-0.0654745	-0.116605	-0.105336	0.0068256	-0.0589524	-0.00444979								49	-9.02681	-0.014054		49	-10.3251	0.0428828	362.213			-1	-0.024912	-0.0692232	-0.0249834	-0.0822675	-0.0636991	-0.0433343
	49.5	-23.9568	0.057754		49.5	-12.9216	0.0590375	318.369			-0.5	-0.0406096	0.0288165	-0.0541261	0.0244625	0.0171646	-0.0415573		-0.5	-0.0823519	-0.136079	-0.107932	0.00422908	-0.0680402	-0.015485								49.5	-24.6059	0.0111712		49.5	-1.88638	0.0392792	363.077			-0.5	-0.0281576	-0.0555915	-0.0314747	-0.084864	-0.0617517	-0.0563169
	50	-14.869	0.07123		50	-23.3077	0.0462032	298.084			0	-0.0483991	0.0223252	-0.0573717	0.0166729	0.0230068	-0.0441538		0	-0.107668	-0.136079	-0.100792	-0.00550787	-0.0777771	-0.030415								50	-9.67594	0.0327928		50	-10.9742	0.032072	321.863			0	-0.0417894	-0.0445563	-0.0425099	-0.0868114	-0.0500674	-0.0660538
	50.5	-16.1672	0.0834224		50.5	-27.2024	0.0404278	282.861			0.5	-0.0522939	0.00414957	-0.0606174	0.0056377	0.028849	-0.0532416		0.5	-0.130388	-0.124394	-0.0787216	-0.0230344	-0.0894615	-0.050538								50.5	-10.3251	0.0486486		50.5	-8.37768	0.027027	322.214			0.5	-0.059965	-0.0406615	-0.0587382	-0.0842149	-0.0344883	-0.071896
	51	-25.2551	0.0879144		51	-2.53551	0.0346524	268.581			1	-0.0594343	-0.0159735	-0.0580209	0.0056377	0.0294981	-0.0584347		1	-0.131037	-0.104271	-0.0579495	-0.0431574	-0.0959528	-0.0700119								51	-18.1146	0.0572974		51	-22.6585	0.0205405	323.337			1	-0.069702	-0.0361176	-0.0756155	-0.0673375	-0.0234531	-0.0699486
	51.5	-5.78116	0.0879144		51.5	0.061011	0.0250267	250.6			1.5	-0.0691713	-0.0322017	-0.0476348	0.00758508	0.0307963	-0.0525925		1.5	-0.116756	-0.0860957	-0.0384756	-0.0606839	-0.0927071	-0.0862402								51.5	-20.062	0.060901		51.5	-14.869	0.0118919	324.012			1.5	-0.0671054	-0.023135	-0.0898964	-0.0342319	-0.01826	-0.0712469
	52	-1.23725	0.0885562		52	-25.9042	0.0147594	228.756			2	-0.0717678	-0.0445352	-0.0307574	0.0153746	0.0320946	-0.0454521		2	-0.0907906	-0.0698675	-0.0151069	-0.0730174	-0.0790754	-0.10117								52	8.4997	0.0601802		52	-18.1146	0.00108108	325.018			2	-0.054772	-0.0017137	-0.0996333	0.000821148	-0.0234531	-0.0731943
	52.5	-18.7638	0.0872728		52.5	-18.7638	-3.22237e-09	205.647			2.5	-0.0659256	-0.0555704	-0.0125818	0.0192694	0.0333929	-0.0415573		2.5	-0.0661236	-0.0497445	0.00566528	-0.0853509	-0.0550576	-0.107012								52.5	-19.4129	0.0601802		52.5	-23.3077	-0.0169369	326.927			2.5	-0.0327015	0.0236024	-0.103528	0.0235407	-0.0260496	-0.0744925
	53	-16.8164	0.0827808		53	-10.9742	-0.015401	174.489			3	-0.057487	-0.06336	0.00429562	0.0179712	0.0353403	-0.0357151		3	-0.047948	-0.0250775	0.0225427	-0.0950878	-0.0245485	-0.104416								53	-20.062	0.0601802		53	-16.8164	-0.0464864	330.302			3	-0.00738548	0.0437254	-0.0905455	0.0332777	-0.027997	-0.0770891
	53.5	-9.67594	0.0737968		53.5	-12.2725	-0.0295187	146.479			3.5	-0.0496974	-0.0672547	0.0166291	0.0160238	0.0366385	-0.0285747		3.5	-0.0317197	0.00283508	0.0355253	-0.0983335	0.00401325	-0.0946789								53.5	-22.6585	0.0572974		53.5	-18.1146	-0.0760361	333.6			3.5	0.00884277	0.0534623	-0.0619838	0.0371724	-0.0273478	-0.0777382
	54	-16.1672	0.0660962		54	-16.1672	-0.04877	109.998			4	-0.0451535	-0.0607634	0.0231204	0.012129	0.0405333	-0.0175395		4	-0.012895	0.0268529	0.0413674	-0.0976843	0.0273819	-0.0771523								54	-21.3603	0.0529729		54	-31.7464	-0.0926126	258.625			4	0.0133867	0.0573571	-0.0243343	0.0423655	-0.0195583	-0.0660538
	54.5	-20.062	0.0583957		54.5	-23.3077	-0.0718716	64.0722			4.5	-0.0399604	-0.0523247	0.0315591	0.00239204	0.0405333	-0.00455689		4.5	0.00917545	0.042432	0.043964	-0.0983335	0.0455576	-0.0550819								54.5	-20.062	0.0479279		54.5	-16.1672	-0.106306	260.287			4.5	0.0153341	0.0625502	0.0094205	0.0508042	-0.00268091	-0.0394395
	55	3.95579	0.0564706		55	-19.4129	-0.0949733	18.5033			5	-0.0354165	-0.0419387	0.0380504	-0.0105906	0.0346911	0.0038818		5	0.0247546	0.0502216	0.0446131	-0.0879474	0.0565928	-0.0336606								55	-18.7638	0.04		55	-19.4129	-0.111351	261.157			5	0.0185797	0.0606028	0.0321401	0.0611902	0.0141965	-0.00373737
	55.5	-18.1146	0.0583957		55.5	-18.7638	-0.102674	-10.4479			5.5	-0.0243813	-0.0347982	0.0406469	-0.0209766	0.0307963	0.00842571		5.5	0.0390354	0.0541164	0.0485079	-0.0580874	0.0611367	-0.0089937								55.5	-27.8516	0.0363964		55.5	-23.9568	-0.105586	261.111			5.5	0.0211762	0.0534623	0.0405787	0.0670324	0.0245826	0.0313157
	56	-19.4129	0.0603209		56	-25.2551	-0.0891979	2.85922			6	-0.00555655	-0.0296052	0.0419452	-0.0313627	0.0275507	0.00712745		6	0.0552637	0.0489233	0.0511044	-0.0191396	0.0617858	0.0169715								56	-18.7638	0.0378378		56	-156.379	-0.0940541	339.046			6	0.0257202	0.0495676	0.0431753	0.0670324	0.0213369	0.0572809
	56.5	-20.7111	0.0545454		56.5	-7.07942	-0.0558289	62.2871			6.5	0.0152156	-0.0192191	0.0438925	-0.0339592	0.0262524	0.0103731		6.5	0.0721411	0.0411337	0.0517535	0.0159134	0.0630841	0.034498								56.5	-34.3429	0.0371171		56.5	-45.3781	-0.065946	336.521			6.5	0.0354571	0.0528132	0.0457718	0.0611902	0.0141965	0.0761056
	57	-21.3603	0.0442781		57	-11.6233	-0.017968	139.858			7	0.0346895	-0.00688565	0.0425943	-0.0274679	0.0230068	0.0214083		7	0.0831763	0.0385372	0.0498061	0.0418786	0.0643823	0.0474806								57	-27.2024	0.0356756		57	-3.18464	-0.0263063	332.197			7	0.0464923	0.0612519	0.0509648	0.0527515	0.0128982	0.0825969
	57.5	-21.3603	0.0417113		57.5	-7.07942	0.00770053	197.436			7.5	0.0476721	0.00285131	0.0393486	-0.0203275	0.0158664	0.0343909		7.5	0.0864219	0.0385372	0.0426657	0.0555104	0.0630841	0.0572176								57.5	-18.1146	0.0299099		57.5	5.25405	0.0162162	327.108			7.5	0.0503871	0.0664449	0.056807	0.0475585	0.0154947	0.0806495
	58	-20.062	0.0391444		58	-17.4655	0.0314438	247.192			8	0.0561108	0.0106409	0.036103	-0.0196784	0.0080768	0.0415313		8	0.0831763	0.0391864	0.03942	0.063949	0.0624349	0.0604632								58	-38.2377	0.021982		58	-9.02681	0.0508108	499.427			8	0.0484397	0.0651467	0.0632983	0.0417163	0.0193895	0.0761056
	58.5	4.60492	0.037861		58.5	-5.13203	0.0558289	295.033			8.5	0.0632512	0.0203778	0.0335065	-0.0222749	0.0015855	0.0415313		8.5	0.0760358	0.042432	0.0400692	0.0658964	0.0604876	0.0604632								58.5	2.65753	0.0198198		58.5	-15.5181	0.070991	496.356			8.5	0.040001	0.0593045	0.0645966	0.0371724	0.0252317	0.0748074
	59	-20.062	0.033369		59	-8.37768	0.0750802	338.2			9	0.0690934	0.0320622	0.0348047	-0.0307136	-0.0120462	0.0382857		9	0.066948	0.0430811	0.0420166	0.0691421	0.0546454	0.059165								59	-20.7111	0.0190991		59	-10.3251	0.083964	494.454			9	0.0302641	0.0508658	0.0607018	0.0378216	0.0265299	0.0748074
	59.5	-6.43029	0.0218182		59.5	-10.3251	0.0879144	366.275			9.5	0.0716899	0.0417991	0.0393486	-0.0307136	-0.0172393	0.0356892		9.5	0.0578602	0.0404846	0.0413674	0.0723877	0.0513997	0.0611123								59.5	-14.2198	0.0147748		59.5	-27.8516	0.0940541	493.481			9.5	0.0224745	0.041778	0.056807	0.0378216	0.0213369	0.0696143
	60	-14.2198	0.0134759		60	-10.9742	0.0956149	385.521			10	0.0729882	0.0528343	0.0419452	-0.0307136	-0.0198358	0.03504		10	0.0539654	0.0411337	0.0322796	0.0749843	0.0552945	0.0630597								60	-23.9568	0.00828829		60	-0.588119	0.101982	422.965			10	0.0179306	0.0320411	0.0555087	0.0358742	0.0116	0.0663687
	60.5	-19.4129	0.00256684		60.5	-14.2198	0.100107	396.589			10.5	0.0729882	0.0599747	0.0386995	-0.0320118	-0.0165901	0.0369874		10.5	0.0526672	0.0417829	0.0244901	0.0691421	0.0572419	0.0650071								60.5	-18.7638	-0.00108108		60.5	-25.2551	0.103423	422.29			10.5	0.0166323	0.0255498	0.0581052	0.0306811	-0.00203178	0.063123
	61	-15.5181	-0.0160428		61	-3.83377	0.105882	404.606			11	0.0684443	0.0645187	0.0328573	-0.0372049	-0.00750232	0.0369874		11	0.0494215	0.042432	0.0205953	0.0626508	0.0565928	0.0624106								61	-18.1146	-0.00972972		61	-20.062	0.0983784	422.842			11	0.0179306	0.0249006	0.0600526	0.024839	-0.00982134	0.05793
	61.5	-15.5181	-0.0385027		61.5	-19.4129	0.110374	415.803			11.5	0.0613038	0.0599747	0.0283134	-0.0391523	0.000287242	0.0317944		11.5	0.0442285	0.0417829	0.0199461	0.0581069	0.052698	0.0585158								61.5	-13.5707	-0.0169369		61.5	-27.2024	0.0918919	423.283			11.5	0.0185797	0.026848	0.0594035	0.0209442	-0.0137161	0.0540352
	62	-23.3077	-0.0571123		62	-16.1672	0.111016	425.638			12	0.0574091	0.0515361	0.0192256	-0.032661	0.00418202	0.0317944		12	0.0403337	0.0385372	0.0212444	0.053563	0.0481541	0.0539719								62	-12.2725	-0.021982		62	-8.37768	0.0861262	334.132			12	0.0133867	0.0281463	0.0542105	0.0170494	-0.0169618	0.0475439
	62.5	-16.1672	-0.066738		62.5	-8.37768	0.105241	413.239			12.5	0.0528652	0.046343	0.00883953	-0.017731	0.00612941	0.0330926		12.5	0.037088	0.0320459	0.0205953	0.0451243	0.0442593	0.0474806								62.5	-16.1672	-0.0248648		62.5	-23.9568	0.0760361	334.911			12.5	0.00819364	0.0242515	0.0503157	0.0125055	-0.0137161	0.0397543
	63	-20.062	-0.0603209		63	-16.8164	0.0956149	395.193			13	0.0463738	0.0456939	0.0016991	0.00174292	0.00418202	0.0369874		13	0.0344915	0.022309	0.0167005	0.0327908	0.0371189	0.044235								63	-10.9742	-0.032072		63	-16.1672	0.0717118	335.45			13	0.00754452	0.0223041	0.0405787	0.00211941	-0.0124179	0.0306665
	63.5	-11.6233	-0.0417113		63.5	-23.3077	0.0879144	377.991			13.5	0.0424791	0.0489395	-0.000897424	0.0186203	0.00353289	0.0441279		13.5	0.031895	0.00997551	0.0108583	0.023703	0.0273819	0.0435858								63.5	-83.6768	-0.0443243		63.5	-17.4655	0.0630631	336.423			13.5	0.0120884	0.0177602	0.0340874	-0.0115123	-0.0137161	0.0261226
	64	-7.07942	-0.0211765		64	-6.43029	0.0847058	367.833			14	0.0405317	0.0495887	-0.00349394	0.0238133	0.000287242	0.0480226		14	0.0273511	-0.00365623	0.00306876	0.023703	0.0163467	0.0468315								64	-70.045	-0.0623423		64	-28.5007	0.0544145	314.619			14	0.0120884	0.0125672	0.0275961	-0.0186528	-0.0137161	0.0261226
	64.5	-13.5707	-0.00641712		64.5	-7.72855	0.0802139	357.901			14.5	0.0424791	0.046343	-0.00738872	0.0205677	-0.00750232	0.0441279		14.5	0.0143685	-0.0192353	-0.00731732	0.0275978	0.00401325	0.0468315								64.5	-7.07942	-0.0810811		64.5	-17.4655	0.0493693	315.099			14.5	0.00819364	0.000882817	0.0198066	-0.0238458	-0.00592656	0.0215787
	65	-7.07942	-0.00385027		65	-8.37768	0.0705882	341.64			15	0.0431282	0.0366061	-0.00414307	0.0134273	-0.00944971	0.0343909		15	0.00852632	-0.0354636	-0.025493	0.028896	-0.0102676	0.0416384								65	0.710141	-0.096937		65	-23.3077	0.0407207	315.878			15	-0.00543809	-0.0114507	0.00617485	-0.029688	0.00316127	0.0176839
	65.5	-18.7638	-0.00705883		65.5	-6.43029	0.0648128	331.287			15.5	0.0411808	0.0301148	-0.00154655	0.0127781	-0.00360754	0.0278996		15.5	0.00268415	-0.0503936	-0.0527564	0.028896	-0.0310398	0.0351471								65.5	-7.72855	-0.107748		65.5	-16.1672	0.0227027	317.501			15.5	-0.0236137	-0.0166437	-0.00940427	-0.0387758	0.00575779	0.0157365
	66	-24.6059	-0.00192514		66	-6.43029	0.0660962	327.522			16	0.0346895	0.0288165	-0.000248292	0.0186203	0.00612941	0.0220574		16	-0.0070528	-0.0607797	-0.0787216	0.0262995	-0.0608998	0.0260593								66	-17.4655	-0.112072		66	-22.6585	0.00468469	302.766			16	-0.0365963	-0.0198893	-0.0210886	-0.0504601	0.0083543	0.0111926
	66.5	-18.7638	0.0057754		66.5	-16.1672	0.0680214	333.721			16.5	0.0256017	0.031413	-0.00803785	0.0251116	0.0119716	0.0110222		16.5	-0.0174389	-0.0744114	-0.100792	0.0243521	-0.0901106	0.0215154								66.5	-16.8164	-0.0976577		66.5	-20.062	-0.0118919	304.889			16.5	-0.0495789	-0.0224859	-0.0288782	-0.0588988	0.00640691	0.00470133
	67	-17.4655	0.0134759		67	-12.2725	0.0673796	334.24			17	0.0165139	0.031413	-0.0262135	0.0264099	0.0106733	0.000636149		17	-0.0323689	-0.0906396	-0.117669	0.0198082	-0.11283	0.0163224								67	-14.2198	-0.065946		67	-10.3251	-0.0277477	306.94			17	-0.0645089	-0.0244333	-0.0366677	-0.0666884	0.00186301	-0.00373737
	67.5	-10.3251	0.0231016		67.5	-7.07942	0.0603209	321.03			17.5	0.0139173	0.0203778	-0.0411435	0.0238133	0.00483115	-0.00650428		17.5	-0.047948	-0.101026	-0.12481	0.0100713	-0.128409	0.0130767								67.5	-11.6233	-0.0241441		67.5	-9.02681	-0.0436036	308.634			17.5	-0.080088	-0.028328	-0.0405625	-0.0653901	-0.000733518	-0.0147726
	68	-23.3077	0.0352942		68	-1.88638	0.0500534	301.784			18	0.00872431	0.00739521	-0.0502313	0.0186203	0.00612941	-0.014943		18	-0.0622288	-0.104921	-0.115073	-0.000963959	-0.145936	0.000743254								68	-12.2725	0.0133333		68	-22.0094	-0.0609008	284.357			18	-0.0924215	-0.0439072	-0.0412116	-0.0738288	0.00316127	-0.0322991
	68.5	-10.3251	0.0462032		68.5	-14.2198	0.0385027	281.628			18.5	0.00353127	-0.00299087	-0.0541261	0.0186203	0.00548028	-0.0292238		18.5	-0.0817028	-0.0984292	-0.0852129	-0.0132974	-0.149181	-0.0141867								68.5	-11.6233	0.0385585		68.5	-22.6585	-0.078919	286.155			18.5	-0.095018	-0.067925	-0.0360186	-0.0861623	0.00900343	-0.0563169
	69	-10.3251	0.0558289		69	-9.02681	0.0250267	255.403			19	-0.00296003	-0.00623652	-0.048933	0.0192694	0.00677854	-0.0409082		19	-0.105071	-0.0854466	-0.0449669	-0.0399118	-0.136199	-0.0433976								69	-16.1672	0.0479279		69	-20.7111	-0.0868469	287.628			19	-0.0924215	-0.0990832	-0.0288782	-0.094601	0.0135473	-0.0803347
	69.5	-6.43029	0.0654546		69.5	-4.4829	0.000641708	214.119			19.5	-0.012697	-0.0107804	-0.038547	0.0192694	0.0119716	-0.0422064		19.5	-0.12844	-0.0698675	-0.0118612	-0.0704209	-0.114778	-0.0797489								69.5	-15.5181	0.0508108		69.5	-28.5007	-0.089009	288.349			19.5	-0.084632	-0.110768	-0.032773	-0.0894079	0.0200386	-0.0926682
	70	-13.5707	0.0725134		70	-9.02681	-0.0346524	145.149			20	-0.0250305	-0.0211665	-0.0307574	0.00888334	0.0171646	-0.0415573		20	-0.13623	-0.0484462	0.0082618	-0.091193	-0.0881632	-0.107661								70	-18.1146	0.0536936		70	-26.5533	-0.0803604	318.851			20	-0.0761933	-0.0977849	-0.052896	-0.0757762	0.0265299	-0.0887734
	70.5	-33.0446	0.0770053		70.5	-10.9742	-0.0699466	71.4073			20.5	-0.03282	-0.0438861	-0.0275118	-0.00345013	0.0204103	-0.0461012		20.5	-0.122598	-0.0270249	0.0147531	-0.102877	-0.0589524	-0.118697								70.5	-14.2198	0.0594595		70.5	-5.13203	-0.063063	316.91			20.5	-0.0677546	-0.0750654	-0.0788612	-0.0530566	0.0330212	-0.0848786
	71	-19.4129	0.0776471		71	-14.869	-0.0936899	15.4848			21	-0.042557	-0.0705004	-0.0262135	-0.0105906	0.0197611	-0.0577856		21	-0.0888432	-0.0101475	0.0179988	-0.110018	-0.0232502	-0.119995								71	-16.8164	0.065946		71	-30.4481	-0.0385585	314.567			21	-0.0593159	-0.0607845	-0.0970368	-0.0290388	0.0460038	-0.0900717
	71.5	-9.02681	0.0737968		71.5	-15.5181	-0.10139	-4.54086			21.5	-0.0458026	-0.0932199	-0.023617	-0.0105906	0.0126207	-0.0642769		21.5	-0.0505445	0.00932638	0.0238409	-0.112614	0.00985542	-0.121942								71.5	-16.8164	0.0731532		71.5	-19.4129	-0.0169369	311.808			21.5	-0.0437368	-0.0471528	-0.097686	-0.00696841	0.0524951	-0.0874751
	72	-19.4129	0.0680214		72	-22.6585	-0.100107	-10.2207			22	-0.052943	-0.10036	-0.0158274	-0.000204476	0.00093637	-0.0642769		22	-0.0245793	0.0307477	0.0303322	-0.107421	0.0364697	-0.134276								72	-27.2024	0.0745946		72	-14.2198	-0.00612612	438.785			22	-0.0145259	-0.0257315	-0.073019	0.0118564	0.0524951	-0.0731943
	72.5	-16.8164	0.0648128		72.5	-12.9216	-0.0949733	-5.87158			22.5	-0.0639783	-0.0912725	-0.00673959	0.00823422	-0.0113971	-0.0616803		22.5	-0.000561499	0.0463268	0.03942	-0.103527	0.0533471	-0.137521								72.5	-17.4655	0.0702703		72.5	-12.9216	0.0104505	437.058			22.5	0.0224745	-0.00366109	-0.0373169	0.0267864	0.0492495	-0.0576152
	73	-26.5533	0.0654546		73	-21.3603	-0.0847058	15.7445			23	-0.0711187	-0.0730969	0.00299736	0.00823422	-0.0165901	-0.0564873		23	0.0241054	0.057362	0.0426657	-0.0957369	0.067628	-0.116749								73	-26.5533	0.065946		73	-21.3603	0.0291892	435.208			23	0.0562293	0.0190585	-0.00486036	0.0404181	0.0440565	-0.0452817
	73.5	-18.1146	0.0654546		73.5	-18.7638	-0.0699466	48.5904			23.5	-0.0691713	-0.0607634	0.0133834	0.000444652	-0.0217832	-0.0435047		23.5	0.0435793	0.0677481	0.0426657	-0.0782104	0.0793123	-0.0765032								73.5	-20.7111	0.0645046		73.5	-26.5533	0.0493693	432.715			23.5	0.0815453	0.0313919	0.0249996	0.044962	0.0382143	-0.0303517
	74	-25.9042	0.0603209		74	-9.67594	-0.0545454	73.9714			24	-0.0613817	-0.0575178	0.0218221	-0.0112397	-0.0243797	-0.0266273		24	0.0565619	0.0683972	0.0400692	-0.0489996	0.0851545	-0.0297659								74	-16.8164	0.0673874		74	-10.3251	0.065946	425.763			24	0.0951771	0.0339885	0.0503157	0.0456111	0.0349686	-0.00893041
	74.5	-8.37768	0.053262		74.5	-1.88638	-0.0308022	119.93			24.5	-0.0568378	-0.0581669	0.0250678	-0.017731	-0.0243797	-0.00845167		24.5	0.0643515	0.0632042	0.0374727	-0.0197887	0.0819088	0.00528717								74.5	-12.9216	0.0695496		74.5	-16.8164	0.0717118	424.738			24.5	0.102967	0.0372341	0.0697896	0.0462603	0.0336704	0.0137891
	75	-18.1146	0.0506952		75	-23.3077	0.00385026	183.252			25	-0.0646274	-0.0497282	0.0257169	-0.0190292	-0.0230814	0.00712745		25	0.0688954	0.0619059	0.0361744	0.00747473	0.0747684	0.0234628								75	-15.5181	0.0688289		75	-14.2198	0.070991	424.906			25	0.0990718	0.0391815	0.0743335	0.0430146	0.0304247	0.0345613
	75.5	-16.8164	0.0539038		75.5	-25.2551	0.0429947	264.329			25.5	-0.0769609	-0.0302543	0.0250678	-0.0183801	-0.0217832	0.0188118		25.5	0.0747376	0.0567129	0.0381218	0.0262995	0.0669789	0.0338489								75.5	-22.0094	0.0630631		75.5	-7.07942	0.0666667	425.231			25.5	0.0841419	0.0411289	0.0691405	0.0391198	0.0200386	0.0462456
	76	-18.1146	0.0609625		76	-3.83377	0.07123	326.288			26	-0.0665748	-0.00948217	0.0224713	-0.0216258	-0.0191867	0.0220574		26	0.0792815	0.0534672	0.0426657	0.0412295	0.0598384	0.034498								76	-16.1672	0.0587388		76	-7.07942	0.0645046	358.344			26	0.0724575	0.0463219	0.0600526	0.0397689	0.0103017	0.0540352
	76.5	-20.7111	0.0596791		76.5	-13.5707	0.0872728	368.255			26.5	-0.0399604	0.00544783	0.0192256	-0.0313627	-0.0198358	0.0272505		26.5	0.0799306	0.052169	0.043964	0.053563	0.057891	0.0370945								76.5	-15.5181	0.0479279		76.5	-14.869	0.0637838	358.637			26.5	0.0640188	0.0547606	0.0529122	0.0404181	0.0083543	0.05793
	77	-108.344	0.053262		77	-7.72855	0.0930481	382.795			27	-0.0113987	0.0119391	0.0166291	-0.0359066	-0.0321693	0.029847		27	0.0740885	0.0495724	0.0407183	0.063949	0.0539963	0.0403402								77	-20.7111	0.0407207		77	-19.4129	0.0637838	358.682			27	0.0555801	0.0573571	0.0509648	0.0384707	0.0128982	0.0611756
	77.5	-15.5181	0.0352942		77.5	-7.07942	0.0981818	395.064			27.5	0.00937344	0.0151848	0.0107869	-0.0391523	-0.0464501	0.0266014		27.5	0.0643515	0.0437303	0.0355253	0.0723877	0.0520489	0.0481297								77.5	-18.1146	0.0335135		77.5	-7.07942	0.0645046	358.591			27.5	0.0484397	0.0560589	0.0555087	0.0358742	0.0161439	0.0644213
	78	13.0436	0.015401		78	4.60492	0.104599	407.008			28	0.0262508	0.0151848	0.00299736	-0.0372049	-0.0529414	0.0253031		28	0.0565619	0.0391864	0.0303322	0.0762825	0.0481541	0.0565684								78	-13.5707	0.0248648		78	-21.3603	0.0673874	347.835			28	0.0445449	0.0541115	0.0555087	0.0319794	0.0116	0.0624739
	78.5	-18.1146	-0.000641714		78.5	-6.43029	0.112299	420.023			28.5	0.0398826	0.0158339	0.000400836	-0.032661	-0.0522923	0.0285487		28.5	0.0533163	0.0359407	0.0277357	0.0749843	0.0449084	0.0617615								78.5	-22.0094	0.00972973		78.5	-5.78116	0.0630631	347.848			28.5	0.0445449	0.0495676	0.0548596	0.0287337	-0.00268091	0.0618248
	79	-15.5181	-0.0128342		79	-17.4655	0.117433	431.123			29	0.052216	0.0216761	0.00234823	-0.022924	-0.0529414	0.0285487		29	0.0487724	0.0300985	0.0231918	0.068493	0.0410137	0.0624106								79	-11.6233	-0.00756756		79	-3.18464	0.0529729	348.679			29	0.0419484	0.041778	0.0529122	0.0261372	-0.0143652	0.0585791
	79.5	-20.7111	-0.0237433		79.5	-16.8164	0.12	435.894			29.5	0.0567599	0.031413	0.00559388	-0.00799404	-0.0600819	0.0253031		29.5	0.0390354	0.0262038	0.0173496	0.0594051	0.0403645	0.0604632								79.5	-14.2198	-0.0205405		79.5	-20.062	0.0392792	350.315			29.5	0.0412993	0.0339885	0.0490174	0.0261372	-0.0156635	0.05793
	80	-9.02681	-0.0314438		80	-23.3077	0.118717	436.933			30	0.0567599	0.0385535	-0.00154655	0.0036903	-0.060731	0.0240048		30	0.0331933	0.0294494	0.0108583	0.0522647	0.0364697	0.054621								80	-23.3077	-0.0291892		80	-10.9742	0.027027	317.449			30	0.0380536	0.0300937	0.0412279	0.0313303	-0.0117687	0.0566317
	80.5	-8.37768	-0.0352942		80.5	-7.07942	0.111658	431.22			30.5	0.0574091	0.0379043	-0.0151783	0.012129	-0.0529414	0.0227066		30.5	0.0344915	0.0313968	0.00696354	0.0542121	0.0306276	0.0468315								80.5	-33.0446	-0.0378378		80.5	-13.5707	0.0154955	318.897			30.5	0.0335097	0.0281463	0.0353857	0.0313303	-0.0234531	0.0559826
	81	-25.2551	-0.028877		81	-15.5181	0.105882	418.367			31	0.0561108	0.0372552	-0.0197222	0.0186203	-0.0373623	0.0162153		31	0.0364389	0.027502	0.00436702	0.058756	0.0280311	0.0422876								81	-26.5533	-0.0421621		81	-16.1672	-0.00108108	320.409			31	0.0289658	0.0210058	0.0301927	0.0235407	-0.0364357	0.0501404
	81.5	-18.1146	-0.0205348		81.5	1.35927	0.0994652	401.328			31.5	0.0515669	0.0392026	-0.0171257	0.0264099	-0.0211341	0.00712745		31.5	0.0357898	0.0132212	-0.00536993	0.0607034	0.0254345	0.0396911								81.5	-9.02681	-0.0428828		81.5	-21.3603	-0.0277477	323.233			31.5	0.0257202	0.0158128	0.0237014	0.0170494	-0.0416287	0.0423509
	82	-11.6233	-0.0102674		82	2.65753	0.0917647	388.215			32	0.0424791	0.0379043	-0.01388	0.0348485	-0.00425667	-0.00131124		32	0.0286494	-0.00495449	-0.0228964	0.0574577	0.0163467	0.0338489								82	-11.6233	-0.0371171		82	-7.72855	-0.0572972	275.723			32	0.0192289	0.011918	0.021754	0.00990897	-0.0364357	0.0365087
	82.5	-26.5533	-0.00320856		82.5	-24.6059	0.0840642	371.533			32.5	0.0346895	0.0366061	-0.0132309	0.0400416	0.0113224	-0.00196037		32.5	0.0182633	-0.0192353	-0.0430195	0.0522647	0.00531151	0.0286558								82.5	-15.5181	-0.0291892		82.5	-25.2551	-0.0695496	277.742			32.5	0.00884277	0.00802325	0.0198066	0.0040668	-0.0286461	0.0345613
	83	-20.062	0.00192514		83	-20.062	0.0763637	356.311			33	0.0269	0.0398517	-0.0125818	0.0426381	0.0249542	0.00842571		33	0.00657893	-0.0309197	-0.060546	0.0483699	-0.00442544	0.0319015								83	-31.7464	-0.0335135		83	-25.9042	-0.0544144	277.132			33	-0.00154331	0.0106198	0.0204557	0.00211941	-0.0273478	0.0365087
	83.5	-24.6059	0.0121925		83.5	-20.7111	0.0718716	346.314			33.5	0.0249526	0.0443956	-0.0125818	0.0400416	0.0346911	0.0214083		33.5	-0.0070528	-0.0387092	-0.0728795	0.0451243	-0.0154607	0.0312524								83.5	-16.1672	-0.0558558		83.5	-10.9742	-0.0299099	274.243			33.5	-0.00868374	0.0106198	0.0185083	-0.00372276	-0.0286461	0.0365087
	84	-20.7111	0.0243851		84	-10.9742	0.0654546	332.715			34	0.0269	0.0456939	-0.0125818	0.0296555	0.043779	0.0227066		34	-0.0317197	-0.0503936	-0.0852129	0.0425278	-0.0303906	0.0260593								84	-14.2198	-0.0846847		84	-30.4481	-0.0190991	367.348			34	-0.00868374	0.00672499	0.00812224	-0.0154071	-0.0299444	0.0293683
	84.5	9.79796	0.0340106		84.5	-20.7111	0.062246	323.237			34.5	0.0288473	0.0398517	-0.0145292	0.0238133	0.0496211	0.0168644		34.5	-0.0674219	-0.0620779	-0.0949499	0.0405804	-0.0505137	0.0163224								84.5	-12.9216	-0.104865		84.5	-24.6059	-0.0306306	367.841			34.5	-0.00868374	0.000882817	-0.00615862	-0.029688	-0.0260496	0.0241752
	85	-18.7638	0.0417113		85	5.25405	0.0616043	322.166			35	0.0230052	0.0333604	-0.0255644	0.0257607	0.0548142	0.00842571		35	-0.103124	-0.0763588	-0.0981955	0.0353873	-0.0699876	0.00333977								85	-22.0094	-0.105586		85	5.25405	-0.0407207	369.535			35	-0.0145259	-0.00560848	-0.0197904	-0.0439688	-0.01826	0.0209296
	85.5	-21.3603	0.0513368		85.5	-13.5707	0.062246	324.763			35.5	0.0126191	0.0268691	-0.038547	0.0264099	0.0574107	-1.29826e-05		35.5	-0.127142	-0.0841483	-0.0975464	0.0301943	-0.0862158	-0.00380066								85.5	-10.9742	-0.0781982		85.5	-13.5707	-0.0414414	370.211			35.5	-0.0262102	-0.0127489	-0.0262817	-0.0530566	-0.0137161	0.0189822
	86	-9.67594	0.0628877		86	-12.2725	0.0628877	327.165			36	0.0100226	0.0171322	-0.0463365	0.0290064	0.0574107	-0.0123465		36	-0.134931	-0.092587	-0.0981955	0.023703	-0.101146	-0.0115902								86	-16.8164	-0.0385585		86	-3.18464	-0.0363964	341.564			36	-0.0430876	-0.0205385	-0.0301764	-0.0576006	-0.0117687	0.0150874
	86.5	-10.3251	0.0725134		86.5	-20.062	0.0583957	321.387			36.5	0.00742605	0.00609695	-0.0515296	0.032252	0.0561124	-0.029873		36.5	-0.133633	-0.106219	-0.0878094	0.00812386	-0.106988	-0.0187306								86.5	-8.37768	-0.00252252		86.5	-15.5181	-0.0342342	340.928			36.5	-0.0690528	-0.0335211	-0.0366677	-0.0679866	-0.00917221	0.0137891
	87	-24.6059	0.0834224		87	-16.8164	0.0462032	296.234			37	0.00612779	-0.00169261	-0.0508804	0.0264099	0.0548142	-0.0512943		37	-0.12844	-0.113359	-0.0579495	-0.00875352	-0.104391	-0.0297659								87	-16.8164	0.0306306		87	-5.78116	-0.032072	340.87			37	-0.0911233	-0.0465037	-0.0490012	-0.084864	-0.0046283	0.0118418
	87.5	-18.7638	0.0904813		87.5	-28.5007	0.0314438	270.138			37.5	0.00158388	-0.00364	-0.0482839	0.0140764	0.048972	-0.064926		37.5	-0.118054	-0.103622	-0.0190017	-0.0191396	-0.0946545	-0.0427485								87.5	-23.3077	0.0587388		87.5	-21.3603	-0.0277477	340.669			37.5	-0.0969654	-0.0588371	-0.0619838	-0.0952501	0.00316127	-0.00503563
	88	-1.23725	0.0949733		88	-18.1146	0.015401	237.13			38	-0.0101005	-0.00623652	-0.0456874	0.0036903	0.0431298	-0.0668734		38	-0.103124	-0.0750605	0.0160514	-0.0243326	-0.077128	-0.0674154								88	-5.78116	0.0803604		88	-11.6233	-0.0205405	370.931			38	-0.0917724	-0.0607845	-0.0710716	-0.0913553	0.0116	-0.0284043
	88.5	-30.4481	0.0904813		88.5	-20.7111	-0.00834224	191.204			38.5	-0.0185392	-0.00883304	-0.0417926	0.000444652	0.0379368	-0.0558382		38.5	-0.0875449	-0.0406566	0.0420166	-0.0321222	-0.0550576	-0.103118								88.5	-23.3077	0.0854054		88.5	-7.72855	-0.00684684	369.776			38.5	-0.0937198	-0.0536441	-0.0710716	-0.0770745	0.0180913	-0.056966
	89	-8.37768	0.082139		89	-10.3251	-0.0468449	121.39			39	-0.0295744	-0.0146752	-0.0340031	0.0036903	0.0359894	-0.0363643		39	-0.0635271	-0.012744	0.0556483	-0.0444557	-0.0336363	-0.134276								89	-14.869	0.0796397		89	-16.8164	0.0154955	367.192			39	-0.0969654	-0.0503985	-0.0691242	-0.0679866	0.0200386	-0.0712469
	89.5	-11.6233	0.0770053		89.5	-7.07942	-0.0840642	43.657			39.5	-0.0483991	-0.0231139	-0.0158274	0.00239204	0.034042	-0.0175395		39.5	-0.0284741	0.00867725	0.064087	-0.0652278	-0.00896935	-0.142065								89.5	-14.869	0.0695496		89.5	-7.72855	0.0335135	364.758			39.5	-0.0937198	-0.0568898	-0.0626329	-0.0576006	0.0213369	-0.0764399
	90	-14.2198	0.0763637		90	-12.2725	-0.103316	-4.5084			40	-0.0711187	-0.0341491	0.00494475	-0.00474839	0.0346911	-0.00455689		40	0.0111228	0.0203616	0.0660344	-0.0905439	0.0169958	-0.130381								90	-22.0094	0.0616217		90	-14.2198	0.0464864	426.568			40	-0.0911233	-0.0601354	-0.0502995	-0.0342319	0.021986	-0.0705978
	90.5	-25.9042	0.0795722		90.5	-64.2029	-0.103316	-17.5884			40.5	-0.0899435	-0.0445352	0.0146817	-0.0138362	0.0353403	0.00582919		40.5	0.0396846	0.027502	0.06928	-0.116509	0.0345224	-0.112855								90.5	-3.18464	0.0594595		90.5	-6.43029	0.0536936	425.64			40.5	-0.0930706	-0.0601354	-0.037966	0.00017202	0.0278282	-0.0628082
	91	-21.3603	0.0802139		91	-3.18464	-0.0917647	4.28731			41	-0.0996804	-0.0542721	0.0198747	-0.0183801	0.0314455	0.014917		41	0.0559128	0.0326951	0.0725257	-0.135983	0.047505	-0.0933806								91	-18.1146	0.0645046		91	-16.8164	0.0508108	425.822			41	-0.0833337	-0.0568898	-0.0314747	0.0313303	0.0310739	-0.0537204
	91.5	-25.9042	0.0770053		91.5	5.90318	-0.0718716	38.7561			41.5	-0.0931891	-0.0575178	0.0218221	-0.0196784	0.0262524	0.0220574		41.5	0.061755	0.0417829	0.0751222	-0.139229	0.0572419	-0.0765032								91.5	-9.02681	0.0645046		91.5	-18.1146	0.0464864	426.367			41.5	-0.0586667	-0.0406615	-0.0295273	0.0514533	0.0323721	-0.0426852
	92	-12.2725	0.0673796		92	-25.9042	-0.0539038	77.9311			42	-0.0743643	-0.0607634	0.021173	-0.0248714	0.0236559	0.0220574		42	0.066948	0.0489233	0.06928	-0.126895	0.0604876	-0.050538								92	-16.1672	0.0637838		92	-22.0094	0.0421621	353.69			42	-0.0229646	-0.0172928	-0.0197904	0.0592429	0.0278282	-0.0297026
	92.5	-11.6233	0.0609625		92.5	2.0084	-0.037861	112.303			42.5	-0.0535922	-0.0581669	0.0185765	-0.0307136	0.0171646	0.0233557		42.5	0.0734393	0.0534672	0.0627887	-0.101579	0.0604876	-0.0174324								92.5	-14.2198	0.0616217		92.5	-16.8164	0.045045	353.392			42.5	0.00819364	0.00542673	-0.00226384	0.0624885	0.0232843	-0.0180182
	93	-25.9042	0.0596791		93	-20.7111	-0.017968	147.745			43	-0.0386622	-0.0477808	0.0166291	-0.0333101	0.00677854	0.0278996		43	0.0812289	0.0560637	0.0582448	-0.0736665	0.0591893	0.0169715								93	-13.5707	0.0572974		93	-19.4129	0.0479279	352.788			43	0.0309132	0.0249006	0.0198066	0.0644359	0.0226352	-0.0108778
	93.5	-9.02681	0.062246		93.5	-13.5707	0.00641711	198.669			43.5	-0.0360657	-0.0309035	0.0192256	-0.0300645	-0.00555493	0.0324435		43.5	0.0864219	0.0534672	0.0537009	-0.0438065	0.0611367	0.0429367								93.5	-6.43029	0.0486486		93.5	-15.5181	0.0443243	353.268			43.5	0.0464923	0.0391815	0.0405787	0.0670324	0.0213369	-0.00957954
	94	-23.3077	0.062246		94	-20.7111	0.0340106	252.287			44	-0.0393113	-0.0127278	0.0224713	-0.0281171	-0.015941	0.0311453		44	0.0890185	0.0495724	0.0452622	-0.0145957	0.0630841	0.054621								94	-18.7638	0.0421621		94	-24.6059	0.0363964	347.835			44	0.0516854	0.0469711	0.0542105	0.0715763	0.0206878	-0.00957954
	94.5	-25.9042	0.0513368		94.5	-27.2024	0.057754	300.355			44.5	-0.0341183	0.00414957	0.0231204	-0.0274679	-0.0269762	0.0311453		44.5	0.0877202	0.0456777	0.0329287	0.0126678	0.0650315	0.0598141								94.5	-20.062	0.0363964		94.5	-16.1672	0.027027	348.952			44.5	0.0503871	0.0502167	0.0645966	0.0767694	0.0116	-0.00503563
	95	-22.0094	0.0385027		95	-10.3251	0.0731551	338.881			45	-0.0263287	0.016483	0.0231204	-0.0190292	-0.0373623	0.0343909		45	0.0805798	0.0417829	0.0238409	0.0321417	0.0624349	0.0637089								95	-8.37768	0.0291892		95	-12.2725	0.0198198	349.685			45	0.0471414	0.0495676	0.0723861	0.0780676	-0.00203178	0.000806542
	95.5	-16.1672	0.0282353		95.5	-9.67594	0.0808556	361.828			45.5	-0.0185392	0.0229743	0.0237695	-0.00734491	-0.0432045	0.0343909		45.5	0.0747376	0.0391864	0.0238409	0.0464225	0.0585402	0.0676036								95.5	-13.5707	0.027027		95.5	-27.2024	0.0176576	350.399			45.5	0.0445449	0.0495676	0.0743335	0.0741728	-0.0176109	0.00210481
	96	-8.37768	0.0250267		96	-24.6059	0.0847058	364.912			46	-0.0088022	0.031413	0.0270152	0.00109378	-0.0425553	0.0343909		46	0.0682463	0.0294494	0.0277357	0.0568086	0.0539963	0.0689019								96	-29.1498	0.0248648		96	-15.5181	0.00900901	321.299			46	0.0432467	0.0495676	0.0704387	0.0696289	-0.0305935	0.00210481
	96.5	-7.72855	0.0205348		96.5	-12.9216	0.0795722	363.581			46.5	0.00353127	0.0379043	0.0289626	0.00498856	-0.040608	0.0343909		46.5	0.0604567	0.0216598	0.029034	0.0613525	0.047505	0.0676036								96.5	-10.9742	0.0255856		96.5	-20.7111	-0.009009	322.915			46.5	0.0432467	0.0469711	0.0613509	0.0605411	-0.0409796	0.00535045
	97	-11.6233	0.0102674		97	-10.3251	0.0718716	349.852			47	0.0145665	0.0405008	0.0250678	0.00758508	-0.0432045	0.0337418		47	0.0526672	0.0158177	0.029034	0.0620017	0.0442593	0.0656563								97	-9.02681	0.0234234		97	-71.9924	-0.0263063	325.615			47	0.040001	0.0430763	0.0535613	0.0546989	-0.0474709	0.0144383
	97.5	-1.23725	-0.0121925		97.5	-14.869	0.0693048	340.829			47.5	0.0243034	0.0417991	0.0192256	0.0108307	-0.0522923	0.0356892		47.5	0.0448776	0.0138703	0.0264374	0.0581069	0.0436102	0.0637089								97.5	-14.869	0.0118919		97.5	-67.4485	-0.0392792	327.303			47.5	0.0374045	0.0385324	0.0483683	0.0540498	-0.0474709	0.022877
	98	-19.4129	-0.0385027		98	0.061011	0.0693048	338.297			48	0.0340404	0.0437465	0.0107869	0.012129	-0.0574853	0.0408822		48	0.0403337	0.0132212	0.0244901	0.0548612	0.0468558	0.0624106								98	-27.8516	-0.00396396		98	-12.2725	-0.0623423	290.387			48	0.0322115	0.0313919	0.0496666	0.0514533	-0.0513657	0.0352104
	98.5	-20.7111	-0.0609625		98.5	-14.2198	0.0699466	337.486			48.5	0.0411808	0.0424482	0.00559388	0.0127781	-0.0516432	0.0460752		48.5	0.0338424	0.012572	0.0199461	0.0483699	0.0468558	0.0585158								98.5	-16.8164	-0.0190991		98.5	-7.72855	-0.0947748	293.853			48.5	0.0276675	0.0281463	0.0490174	0.0462603	-0.0565587	0.0397543
	99	-9.02681	-0.0680214		99	-15.5181	0.0731551	341.575			49	0.0457247	0.0392026	0.00364649	0.0186203	-0.0445027	0.0473735		49	0.0305967	0.0171159	0.0102092	0.0412295	0.0416628	0.0559193								99	-26.5533	-0.0263063		99	-9.02681	-0.113514	296.917			49	0.0231236	0.0294445	0.041877	0.0384707	-0.0565587	0.0423509
	99.5	-23.9568	-0.0590375		99.5	-23.3077	0.0737968	349.3			49.5	0.0463738	0.0359569	0.00364649	0.0244625	-0.040608	0.044777		49.5	0.0299476	0.0164668	-0.000826019	0.0366856	0.0351715	0.0539719								99.5	-22.6585	-0.0306306		99.5	-19.4129	-0.111351	297.469			49.5	0.0192289	0.0287954	0.0379822	0.0358742	-0.0585061	0.0423509
	100	-27.2024	-0.0410695		100	-13.5707	0.07123	344.594			50	0.0424791	0.0333604	0.0016991	0.0303046	-0.0347658	0.0421805		50	0.0305967	0.0119229	-0.0131595	0.0321417	0.0260837	0.0552702								100	0.061011	-0.0378378		100	-12.9216	-0.101261	291.705			50	0.0205271	0.0274971	0.0334383	0.0345759	-0.0669448	0.0397543
	100.5	-15.5181	-0.028877		100.5	-9.02681	0.0718716	343.88																									100.5	-20.062	-0.0515315		100.5	-27.2024	-0.0911712	290.51
	101	-10.9742	-0.0256685		101	-7.72855	0.0725134	345.892																									101	-19.4129	-0.065946		101	-9.02681	-0.0861262	289.673
	101.5	-17.4655	-0.0263101		101.5	3.30666	0.0731551	346.801																									101.5	-20.062	-0.0760361		101.5	-24.6059	-0.078919	289.089
	102	-23.3077	-0.017968		102	-27.8516	0.0725134	344.756																									102	-14.2198	-0.0760361		102	-11.6233	-0.0587387	402.635
	102.5	-23.9568	0.00128342		102.5	-16.8164	0.0693048	340.667																									102.5	-25.9042	-0.0738739		102.5	-14.2198	-0.0284684	399.259
	103	-20.7111	0.0218182		103	-18.1146	0.0628877	328.593																									103	-15.5181	-0.0666667		103	-15.5181	0.00468469	395.598
	103.5	-13.5707	0.0365776		103.5	-10.9742	0.053262	308.437																									103.5	-24.6059	-0.0529729		103.5	-7.72855	0.0356756	391.755
	104	-15.5181	0.0429947		104	-3.83377	0.0410695	287.633																									104	-33.6938	-0.0392792		104	-31.0972	0.0673874	484.867
	104.5	-10.3251	0.0462032		104.5	-3.18464	0.0275935	265.952																									104.5	-25.2551	-0.032072		104.5	-25.9042	0.0954955	481.361
	105	-12.9216	0.0462032		105	-21.3603	0.0121925	228.529																									105	-18.7638	-0.0299099		105	-24.6059	0.107027	479.544
	105.5	-10.9742	0.0468449		105.5	-21.3603	-0.00385027	195.651																									105.5	-12.2725	-0.0190991		105.5	-7.07942	0.104144	479.245
	106	-19.4129	0.0526204		106	-12.9216	-0.0186096	170.172																									106	-14.2198	0.000360366		106	-7.07942	0.0911712	408.347
	106.5	-20.7111	0.062246		106.5	-9.67594	-0.028877	144.597																									106.5	-11.6233	0.0248648		106.5	-1.88638	0.0781982	410.379
	107	0.710141	0.0693048		107	-20.7111	-0.0423529	121.812																									107	-13.5707	0.0479279		107	-7.07942	0.0673874	411.495
	107.5	-14.869	0.068663		107.5	-12.9216	-0.0583957	87.2461																									107.5	-7.72855	0.0630631		107.5	-10.3251	0.0587388	412.326
	108	-10.9742	0.0680214		108	-11.6233	-0.0686632	59.4958																									108	-11.6233	0.0745946		108	-16.8164	0.0529729	297.339
	108.5	-14.869	0.0699466		108.5	-3.18464	-0.0725134	51.901																									108.5	-16.8164	0.0832433		108.5	-10.3251	0.0515315	297.865
	109	-19.4129	0.068663		109	0.710141	-0.0660962	57.6782																									109	-18.1146	0.0854054		109	-14.869	0.0479279	298.228
	109.5	-24.6059	0.0673796		109.5	-11.6233	-0.053262	81.8259																									109.5	-1.23725	0.0810811		109.5	-4.4829	0.0493693	298.209
	110	-21.3603	0.0705882		110	-18.1146	-0.037861	111.199																									110	-12.2725	0.070991		110	-13.5707	0.0493693	338.812
	110.5	-10.3251	0.0750802		110.5	-12.9216	-0.0166844	148.492																									110.5	-12.9216	0.0623424		110.5	-20.7111	0.045045	338.955
	111	-23.9568	0.0763637		111	-10.3251	0.00449197	193.833																									111	-25.2551	0.0565766		111	-10.9742	0.0291892	340.552
	111.5	-15.5181	0.0705882		111.5	-12.9216	0.0211765	234.144																									111.5	-7.72855	0.0580181		111.5	-22.6585	-0.0018018	343.59
	112	-14.2198	0.0641711		112	-10.9742	0.0404278	271.924																									112	-16.1672	0.0572974		112	-18.1146	-0.0436036	285.791
	112.5	-11.6233	0.057754		112.5	-9.67594	0.0616043	310.806																									112.5	-14.869	0.0493693		112.5	-33.6938	-0.0760361	290.348
	113	-10.9742	0.0481283		113	-10.9742	0.0770053	346.444																									113	-1.23725	0.045045		113	-27.8516	-0.0868469	292.321
	113.5	-16.1672	0.0372192		113.5	-19.4129	0.0879144	373.512																									113.5	-14.2198	0.04		113.5	-29.1498	-0.0875676	293.003
	114	-15.5181	0.0295187		114	-4.4829	0.0981818	394.966																									114	-11.6233	0.0371171		114	-4.4829	-0.0818018	279.904
	114.5	-20.7111	0.0275935		114.5	-4.4829	0.0988235	399.251																									114.5	-23.3077	0.0313513		114.5	-11.6233	-0.0717118	278.469
	115	-10.9742	0.0250267		115	-10.9742	0.0936899	397.011																									115	-11.6233	0.0198198		115	-19.4129	-0.0558558	277.184
	115.5	-15.5181	0.0224599		115.5	-7.07942	0.0924064	390.033																									115.5	-15.5181	0.00540541		115.5	-10.3251	-0.0356756	274.853
	116	-12.2725	0.0166844		116	-6.43029	0.0872728	380.653																									116	-10.3251	-0.00828828		116	-17.4655	-0.0162162	419.668
	116.5	-9.67594	0.00834224		116.5	-8.37768	0.0840642	370.559																									116.5	-26.5533	-0.0126126		116.5	-4.4829	0.00324325	417.188
	117	-11.6233	-0.00256685		117	-17.4655	0.0827808	370.234																									117	-10.9742	-0.0147748		117	-12.9216	0.0248648	414.994
	117.5	-27.2024	-0.0128342		117.5	-10.3251	0.0802139	360.79																									117.5	-22.0094	-0.0118919		117.5	-14.2198	0.0428828	412.787
	118	-25.9042	-0.0224599		118	-20.7111	0.0744385	354.396																									118	-28.5007	-0.0111712		118	-9.02681	0.0508108	434.909
	118.5	-83.6768	-0.0256685		118.5	-16.1672	0.0699466	344.204																									118.5	-18.1146	-0.027027		118.5	-14.2198	0.0601802	434.156
	119	-20.062	-0.028877		119	-7.07942	0.066738	336.707																									119	-20.062	-0.058018		119	-18.1146	0.0681082	432.832
	119.5	1.35927	-0.0263101		119.5	-7.07942	0.0609625	320.998																									119.5	-10.9742	-0.0868469		119.5	-27.8516	0.0760361	431.54
	120	-2.53551	-0.0160428		120	-18.1146	0.0571123	316.454																									120	-13.5707	-0.0983784		120	-25.9042	0.0846847	386.517
	120.5	-15.5181	0.000641708		120.5	-19.4129	0.0603209	316.973																									120.5	-20.062	-0.0933334		120.5	-18.7638	0.0904505	386.088
	121	-20.062	0.0186096		121	-12.9216	0.062246	321.42																									121	-2.53551	-0.0825226		121	-10.9742	0.0911712	385.653
	121.5	-15.5181	0.0352942		121.5	-22.0094	0.0583957	321.842																									121.5	-23.9568	-0.0753154		121.5	-16.1672	0.0861262	386.101
	122	-20.7111	0.0474866		122	-20.062	0.0442781	301.134																									122	-2.53551	-0.0796397		122	-5.13203	0.078919	350.743
	122.5	-21.3603	0.0539038		122.5	-15.5181	0.0263101	262.641																									122.5	-19.4129	-0.0861262		122.5	-28.5007	0.0745946	351.548
	123	-12.9216	0.062246		123	-12.9216	0.0121925	225.706																									123	-33.0446	-0.0882883		123	-31.0972	0.0666667	352.139
	123.5	-15.5181	0.068663		123.5	-13.5707	0.000641708	202.661																									123.5	-22.6585	-0.0911712		123.5	-6.43029	0.0594595	353.294
	124	-3.83377	0.07123		124	-13.5707	-0.00705883	187.764																									124	-52.5185	-0.0933334		124	-14.869	0.0572974	317.514
	124.5	-22.0094	0.0725134		124.5	-13.5707	-0.0186096	167.446																									124.5	-69.3959	-0.0904505		124.5	-31.0972	0.0594595	317.469
	125	-9.67594	0.0744385		125	-14.2198	-0.0301604	142.065																									125	0.710141	-0.0717118		125	18.2367	0.0580181	317.397
	125.5	-14.869	0.0731551		125.5	-18.1146	-0.0442781	118.177																									125.5	24.728	-0.0349549		125.5	-16.8164	0.0515315	318.17
	126	-19.4129	0.0699466		126	-17.4655	-0.0519786	98.2164																									126	-0.588119	0.00396397		126	-11.6233	0.0356756	338.137
	126.5	-7.72855	0.066738		126.5	-18.7638	-0.0603209	79.7487																									126.5	-8.37768	0.0291892		126.5	-23.9568	0.0176576	340.24
	127	-4.4829	0.0641711		127	-12.9216	-0.0737968	57.7432																									127	-16.1672	0.04		127	-16.1672	-0.00828828	343.129
	127.5	-19.4129	0.0654546		127.5	-9.02681	-0.0808556	35.2833																									127.5	-26.5533	0.0443243		127.5	-24.6059	-0.032072	346.381
	128	-25.9042	0.0699466		128	-10.3251	-0.07123	47.9088																									128	-16.1672	0.05009		128	-13.5707	-0.0565765	258.313
	128.5	-20.062	0.0725134		128.5	-9.02681	-0.0429947	93.1857																									128.5	-29.1498	0.0594595		128.5	-15.5181	-0.0753154	260.852
	129	-21.3603	0.0693048		129	-18.1146	-0.00898396	157.742																									129	-13.5707	0.070991		129	-10.9742	-0.0825226	262.078
	129.5	-18.7638	0.0635294		129.5	-10.3251	0.0186096	224.764																									129.5	-22.0094	0.0774775		129.5	-10.9742	-0.0861262	261.975
	130	-23.3077	0.0590375		130	-13.5707	0.0397861	271.469																									130	-14.869	0.0774775		130	-22.0094	-0.0998198	309.277
	130.5	-23.9568	0.0500534		130.5	-7.72855	0.0513368	296.558																									130.5	-25.9042	0.070991		130.5	-16.8164	-0.112072	311.269
	131	-20.7111	0.0397861		131	-15.5181	0.0583957	315.967																									131	-16.1672	0.0616217		131	-14.869	-0.104865	310.958
	131.5	-11.6233	0.0327272		131.5	-16.8164	0.0635294	328.593																									131.5	-5.78116	0.0558558		131.5	-15.5181	-0.0781982	308.446
	132	-3.18464	0.0301604		132	3.30666	0.0725134	339.725																									132	-19.4129	0.0493693		132	-21.3603	-0.0508108	382.206
	132.5	-12.2725	0.0275935		132.5	-8.37768	0.0795722	355.11																									132.5	-27.2024	0.0443243		132.5	-22.6585	-0.0277477	379.331
	133	-3.83377	0.0237433		133	-14.869	0.0840642	368.482																									133	-19.4129	0.045045		133	-20.7111	-0.009009	376.364
	133.5	-33.0446	0.0269519		133.5	-23.9568	0.086631	375.298																									133.5	-5.78116	0.045045		133.5	2.65753	0.00756757	374.884
	134	-15.5181	0.0295187		134	-9.67594	0.0840642	371.435																									134	-4.4829	0.0428828		134	-3.83377	0.0241441	448.145
	134.5	-13.5707	0.0308021		134.5	-8.37768	0.0802139	367.281																									134.5	-19.4129	0.0371171		134.5	-11.6233	0.0378378	446.068
	135	-22.0094	0.0231016		135	-18.7638	0.0763637	358.225																									135	-22.0094	0.0306306		135	-23.3077	0.0457657	444.977
	135.5	-4.4829	0.00513368		135.5	-3.83377	0.0725134	350.76																									135.5	-28.5007	0.0263063		135.5	-20.062	0.0486486	444.737
	136	-5.13203	-0.00962567		136	-9.02681	0.0699466	340.926																									136	-32.3955	0.021982		136	-23.9568	0.0457657	391.288
	136.5	-5.13203	-0.0186096		136.5	-18.1146	0.0603209	328.398																									136.5	-15.5181	0.0169369		136.5	-27.2024	0.0479279	391.398
	137	-7.72855	-0.0224599		137	-18.7638	0.0526204	311.228																									137	-19.4129	0.00540541		137	-17.4655	0.0508108	391.145
	137.5	-26.5533	-0.0173262		137.5	-14.2198	0.0468449	298.213																									137.5	-8.37768	-0.00972972		137.5	-27.2024	0.0508108	391.015
	138	-8.37768	-0.00705883		138	-10.3251	0.0449198	287.6																									138	-18.1146	-0.0176576		138	-12.2725	0.0493693	351.717
	138.5	-21.3603	0.000641708		138.5	-23.3077	0.0442781	283.868																									138.5	-22.6585	-0.0234234		138.5	-16.8164	0.0436036	351.912
	139	-11.6233	0.00385026		139	-6.43029	0.0436363	286.691																									139	-16.8164	-0.0299099		139	-15.5181	0.0378378	353.236
	139.5	-12.9216	0.00513368		139.5	-17.4655	0.0481283	294.189																									139.5	-20.7111	-0.04		139.5	-12.9216	0.0313513	353.379
	140	-21.3603	0.00770053		140	-21.3603	0.0474866	298.084																									140	-13.5707	-0.0529729		140	-15.5181	0.021982	327.66
	140.5	-15.5181	0.015401		140.5	-1.23725	0.0429947	289.872																									140.5	-24.6059	-0.0623423		140.5	-25.2551	0.00972973	329.296
	141	-9.67594	0.0243851		141	-18.7638	0.0359358	276.338																									141	-5.13203	-0.070991		141	-13.5707	-0.009009	331.185
	141.5	-10.3251	0.0340106		141.5	-1.88638	0.0314438	266.698																									141.5	-18.7638	-0.0695496		141.5	-12.2725	-0.0342342	334.164
	142	-21.3603	0.0442781		142	-19.4129	0.0256685	255.923																									142	-7.72855	-0.078919		142	-9.02681	-0.0652253	275.931
	142.5	-12.2725	0.0526204		142.5	-22.0094	0.0109091	230.347																									142.5	-24.6059	-0.0926126		142.5	-15.5181	-0.0882883	279.443
	143	-23.3077	0.0558289		143	-11.6233	-0.0051337	199.059																									143	-19.4129	-0.101982		143	-9.02681	-0.105586	281.468
	143.5	-9.02681	0.0564706		143.5	-12.9216	-0.0166844	168.874																									143.5	-25.2551	-0.0962162		143.5	4.60492	-0.10991	282.825
	144	-16.1672	0.0558289		144	-10.3251	-0.0256685	149.4																									144	-11.6233	-0.0810811		144	-33.0446	-0.101261	291.679
	144.5	-7.72855	0.053262		144.5	-1.88638	-0.0397861	128.206																									144.5	-20.062	-0.0558558		144.5	-18.7638	-0.0846847	290.036
	145	-9.67594	0.0500534		145	-1.23725	-0.0596791	86.4672																									145	-7.07942	-0.0291892		145	-4.4829	-0.0666667	287.745
	145.5	-14.2198	0.0474866		145.5	-9.02681	-0.0731551	53.9133																									145.5	-22.6585	-0.00468468		145.5	-18.1146	-0.0472072	285.538
	146	-10.3251	0.0417113		146	-17.4655	-0.0757219	43.7544																									146	-18.1146	0.0162162		146	-20.062	-0.0263063	437.577
	146.5	-19.4129	0.0340106		146.5	-170.011	-0.0686632	58.3923																									146.5	-19.4129	0.0327928		146.5	-20.062	-0.00612612	435.039
	147	-7.72855	0.0314438		147	-15.5181	-0.0468449	90.3295																									147	-11.6233	0.0479279		147	-31.0972	0.0154955	432.378
	147.5	-19.4129	0.033369		147.5	9.14883	-0.0263101	133.399																									147.5	-24.6059	0.0529729		147.5	-6.43029	0.0371171	429.846
	148	-16.1672	0.0365776		148	-22.0094	-0.00705883	172.801																									148	-1.88638	0.0536936		148	-7.07942	0.0572974	446.503
	148.5	-10.3251	0.0295187		148.5	-12.2725	0.0160428	216.261																									148.5	-9.02681	0.0544145		148.5	-9.67594	0.0760361	443.835
	149	-20.7111	0.0160428		149	-18.1146	0.0365776	263.874																									149	-19.4129	0.0508108		149	-11.6233	0.0911712	441.836
	149.5	-21.3603	0.0115508		149.5	-18.1146	0.053262	299.577																									149.5	-18.1146	0.0464864		149.5	-9.67594	0.0998198	440.817
	150	-19.4129	0.0141176		150	-12.2725	0.0660962	328.56																									150	-16.1672	0.0472072		150	-14.2198	0.107027	411.352
	150.5	-1.88638	0.0173262		150.5	-9.02681	0.0718716	346.217																									150.5	-22.0094	0.0479279		150.5	-26.5533	0.109189	410.502
	151	-16.8164	0.017968		151	-24.6059	0.0744385	353.941																									151	-23.3077	0.0457657		151	-9.67594	0.106306	410.82
	151.5	4.60492	0.0186096		151.5	-3.83377	0.0750802	353.519																									151.5	-18.7638	0.0428828		151.5	-20.062	0.0990991	411.502
	152	2.0084	0.0186096		152	-17.4655	0.0789305	359.297																									152	-12.9216	0.0385585		152	-14.2198	0.0861262	334.119
	152.5	-10.3251	0.0186096		152.5	-11.6233	0.0814973	367.898																									152.5	-19.4129	0.0349549		152.5	-27.2024	0.0753154	335.618
	153	-17.4655	0.0166844		153	-13.5707	0.082139	367.962																									153	2.0084	0.032072		153	-13.5707	0.0695496	336.443
	153.5	-12.2725	0.0057754		153.5	-10.3251	0.0802139	366.405																									153.5	-23.3077	0.032072		153.5	-20.062	0.0601802	337.403
	154	-12.2725	-0.00705883		154	-14.2198	0.0731551	353																									154	-2.53551	0.0378378		154	-20.062	0.0493693	307.07
	154.5	-24.6059	-0.0147594		154.5	-5.13203	0.0699466	338.784																									154.5	-21.3603	0.0378378		154.5	-16.8164	0.0392792	308.413
	155	0.061011	-0.019893		155	-15.5181	0.0705882	341.413																									155	-18.1146	0.0291892		155	-10.3251	0.0284684	309.556
	155.5	-29.799	-0.0192514		155.5	-20.062	0.0725134	345.275																									155.5	-14.2198	0.021982		155.5	-14.869	0.014054	311.101
	156	-20.7111	-0.0166844		156	-12.9216	0.0718716	347.028																									156	-7.72855	0.014054		156	-20.7111	0.000360366	298.988
	156.5	-3.83377	-0.0141176		156.5	-16.1672	0.0628877	335.019																									156.5	-20.062	0.00756757		156.5	-19.4129	-0.0104505	300.455
	157	-10.9742	-0.0102674		157	-17.4655	0.0551872	316.097																									157	-16.8164	0.00540541		157	-14.869	-0.014054	301.065
	157.5	-27.8516	-0.00256685		157.5	-20.062	0.0513368	306.944																									157.5	7.20144	-0.00108108		157.5	-12.2725	-0.014054	301.039
	158	-20.062	0.015401		158	-14.869	0.0506952	302.855																									158	-19.4129	-0.014054		158	-16.8164	-0.0183784	327.809
	158.5	-31.0972	0.0359358		158.5	-17.4655	0.0519786	308.242																									158.5	-17.4655	-0.0299099		158.5	-23.9568	-0.0378378	330.01
	159	-22.0094	0.0455615		159	-10.9742	0.0513368	306.977																									159	-12.2725	-0.0457657		159	-9.67594	-0.063063	333.243
	159.5	-18.1146	0.0506952		159.5	-25.9042	0.0474866	302.627																									159.5	-21.3603	-0.0558558		159.5	-15.5181	-0.0810811	335.281
	160	-16.1672	0.0526204		160	-14.2198	0.0417113	289.937																									160	-26.5533	-0.0609008		160	-21.3603	-0.0962162	283.513
	160.5	-10.3251	0.0519786		160.5	-9.02681	0.0340106	273.384																									160.5	-20.7111	-0.0724325		160.5	-9.67594	-0.104144	285.116
	161	-3.18464	0.0494118		161	-17.4655	0.0237433	256.409																									161	-18.7638	-0.0911712		161	-12.9216	-0.0933334	284.616
	161.5	-13.5707	0.0474866		161.5	2.0084	0.0057754	226.777																									161.5	-16.8164	-0.102703		161.5	-19.4129	-0.065946	282
	162	-13.5707	0.0500534		162	-22.0094	-0.0211765	168.972																									162	-16.8164	-0.0983784		162	-13.5707	-0.0378378	388.847
	162.5	-20.7111	0.053262		162.5	-5.13203	-0.0468449	116.23																									162.5	-16.8164	-0.0825226		162.5	-14.869	-0.0154955	385.77
	163	-10.9742	0.0539038		163	-10.9742	-0.0686632	72.7381																									163	-19.4129	-0.0724325		163	-19.4129	0.00108108	383.336
	163.5	-10.9742	0.0539038		163.5	-10.9742	-0.0853476	33.2061																									163.5	-9.02681	-0.0609008		163.5	-22.6585	0.0111712	382.148
	164	-5.13203	0.0545454		164	-25.9042	-0.0924065	11.2655																									164	-11.6233	-0.0349549		164	-13.5707	0.0147748	438.324
	164.5	-6.43029	0.057754		164.5	-27.2024	-0.0827808	20.0612																									164.5	-1.88638	0.00324325		164.5	-20.062	0.0176576	437.811
	165	-27.2024	0.0596791		165	-14.869	-0.053262	74.0688																									165	-20.7111	0.0378378		165	-3.83377	0.0255856	437.188
	165.5	-20.062	0.0558289		165.5	-12.9216	-0.0134759	148.946																									165.5	-14.869	0.0601802		165.5	-10.3251	0.0306306	436.441
	166	-19.4129	0.0500534		166	-15.5181	0.0192514	225.9																									166	-15.5181	0.0688289		166	-11.6233	0.0335135	371.249
	166.5	-12.9216	0.0417113		166.5	-25.2551	0.0391444	269.749																									166.5	-30.4481	0.0724325		166.5	-20.062	0.032072	371.1
	167	-6.43029	0.0365776		167	-14.869	0.0455615	288.087																									167	2.65753	0.0745946		167	-10.3251	0.0277477	371.859
	167.5	-13.5707	0.0346524		167.5	-18.7638	0.04877	298.83																									167.5	-22.0094	0.0774775		167.5	-16.1672	0.0263063	372.099
	168	-1.23725	0.0346524		168	1.35927	0.0545454	312.462																									168	-8.37768	0.0825226		168	-20.062	0.0263063	344.985
	168.5	-12.9216	0.0327272		168.5	-8.37768	0.0609625	324.568																									168.5	-22.0094	0.0882883		168.5	-3.83377	0.0227027	345.401
	169	-11.6233	0.0301604		169	-16.8164	0.0699466	338.07																									169	-16.1672	0.0897298		169	-31.7464	0.0176576	346.569
	169.5	-18.7638	0.0269519		169.5	-12.9216	0.0731551	348.359																									169.5	-15.5181	0.0854054		169.5	-17.4655	0.0104505	346.965
	170	-22.6585	0.0250267		170	-14.2198	0.0731551	348.424																									170	-5.78116	0.0803604		170	-140.151	0.000360366	332.269
	170.5	-22.6585	0.0231016		170.5	-24.6059	0.0705882	347.872																									170.5	-12.2725	0.0702703		170.5	-42.7816	-0.0176576	334.067
	171	-14.869	0.0186096		171	-8.37768	0.0680214	342.289																									171	-20.7111	0.0637838		171	14.3419	-0.0385585	336.553
	171.5	-17.4655	0.0173262		171.5	-14.2198	0.066738	339.725																									171.5	-19.4129	0.0630631		171.5	7.85057	-0.0565765	338.793
	172	-12.2725	0.015401		172	-25.9042	0.068663	341.381																									172	-2.53551	0.0601802		172	-18.7638	-0.065946	288.122
	172.5	-22.0094	0.0141176		172.5	-19.4129	0.0731551	345.146																									172.5	-32.3955	0.0544145		172.5	-9.67594	-0.078919	289.933
	173	-25.9042	0.0109091		173	-15.5181	0.0744385	348.975																									173	-18.1146	0.0457657		173	-21.3603	-0.0947748	291.478
	173.5	-20.7111	0.00834224		173.5	-9.02681	0.07123	350.014																									173.5	-5.78116	0.0428828		173.5	-24.6059	-0.0983784	292.354
	174	-23.3077	0.00513368		174	-22.0094	0.0660962	339.725																									174	-10.9742	0.0414414		174	-12.2725	-0.0904505	318.877
	174.5	-18.1146	0.00770053		174.5	-14.869	0.0609625	329.534																									174.5	-11.6233	0.0378378		174.5	-6.43029	-0.0760361	317.112
	175	-18.1146	0.0115508		175	-3.18464	0.0583957	321.712																									175	-11.6233	0.027027		175	-22.0094	-0.0601801	315.19
	175.5	-6.43029	0.0102674		175.5	-14.2198	0.0539038	314.442																									175.5	-4.4829	0.0169369		175.5	-10.9742	-0.04	313.055
	176	-10.9742	0.00705882		176	-18.7638	0.0481283	304.153																									176	-14.2198	0.0111712		176	-7.72855	-0.0154955	430.943
	176.5	-20.7111	0.00192514		176.5	-20.7111	0.0417113	290.651																									176.5	-12.9216	0.00756757		176.5	-20.7111	0.0126126	427.444
	177	-28.5007	-0.00449198		177	-17.4655	0.037861	281.401																									177	-22.0094	0.00108108		177	-7.07942	0.0421621	423.666
	177.5	-21.3603	-0.00128342		177.5	-14.869	0.0352942	276.468																									177.5	-22.0094	-0.0126126		177.5	-26.5533	0.0637838	420.713
	178	-7.72855	0.0109091		178	-148.59	0.0256685	257.123																									178	-22.6585	-0.0327928		178	-14.2198	0.0796397	469.378
	178.5	-12.9216	0.0301604		178.5	-36.2903	0.00834224	226.063																									178.5	-10.9742	-0.0515315		178.5	-24.6059	0.0861262	467.989
	179	-12.2725	0.0474866		179	-9.02681	-0.0115508	186.595																									179	-9.67594	-0.0681082		179	-10.3251	0.083964	468.21
	179.5	-9.02681	0.0603209		179.5	-6.43029	-0.028877	147.81																									179.5	-22.6585	-0.0796397		179.5	-31.0972	0.0760361	468.69
	180	-11.6233	0.0628877		180	-14.869	-0.0410695	119.703																									180	-7.72855	-0.083964		180	0.061011	0.070991	352.249
	180.5	-15.5181	0.0609625		180.5	-10.3251	-0.053262	97.2427																									180.5	-22.6585	-0.0861262		180.5	-5.78116	0.065946	353.249
	181	-27.2024	0.0564706		181	-20.7111	-0.0628877	76.925																									181	-16.1672	-0.0818018		181	-9.67594	0.0630631	353.482
	181.5	-166.765	0.04877		181.5	-14.869	-0.0660962	66.6038																									181.5	-24.6059	-0.0688289		181.5	-16.8164	0.0565766	353.976
	182	-17.4655	0.037861		182	-22.6585	-0.0654546	66.0196																									182	-29.1498	-0.045045		182	-10.9742	0.0544145	327.53
	182.5	7.85057	0.037861		182.5	-17.4655	-0.0660962	61.7353																									182.5	-25.9042	-0.0212612		182.5	-20.7111	0.0515315	327.738
	183	-3.18464	0.0397861		183	-11.6233	-0.0558289	75.6267																									183	-7.07942	-0.00252252		183	-33.6938	0.0443243	328.426
	183.5	-19.4129	0.0474866		183.5	-5.78116	-0.0263101	127.525																									183.5	3.30666	0.00396397		183.5	-10.3251	0.0327928	329.685
	184	-19.4129	0.0513368		184	-14.869	0.0121925	204.771																									184	-21.3603	0.00684685		184	-10.9742	0.00972973	317.787
	184.5	-23.3077	0.0500534		184.5	-4.4829	0.0468449	280.46																									184.5	-10.9742	0.014054		184.5	-18.7638	-0.0190991	321.299
	185	-0.588119	0.0481283		185	-7.07942	0.0725134	337.875																									185	-14.2198	0.0227027		185	-11.6233	-0.0472072	324.564
	185.5	-20.062	0.0442781		185.5	-17.4655	0.0859892	374.941																									185.5	-16.1672	0.0277477		185.5	-6.43029	-0.0760361	328.179
	186	-22.6585	0.0346524		186	-8.37768	0.0943315	390.812																									186	-11.6233	0.0299099		186	-8.37768	-0.096937	237.613
	186.5	-6.43029	0.0218182		186.5	-23.9568	0.0962567	399.543																									186.5	-13.5707	0.0349549		186.5	-13.5707	-0.103423	239.151
	187	-4.4829	0.0115508		187	-5.78116	0.0994652	403.113																									187	-10.3251	0.0407207		187	-13.5707	-0.101261	238.976
	187.5	-7.72855	0.00128342		187.5	-14.869	0.102674	410.74																									187.5	-15.5181	0.0472072		187.5	-7.07942	-0.103423	239.287
	188	-6.43029	-0.00128342		188	-12.9216	0.105241	413.207																									188	-14.2198	0.0479279		188	-5.78116	-0.100541	343.94
	188.5	-26.5533	0.00513368		188.5	-5.13203	0.0994652	410.837																									188.5	-15.5181	0.0479279		188.5	-13.5707	-0.0875676	342.519
	189	-10.3251	0.0121925		189	-13.5707	0.0930481	392.5																									189	-23.9568	0.045045		189	-28.5007	-0.0601801	339.922
	189.5	-22.0094	0.0128342		189.5	-15.5181	0.0885562	384.678																									189.5	-15.5181	0.0371171		189.5	-21.3603	-0.0255856	335.716
	190	-7.72855	0.0102674		190	-17.4655	0.0840642	376.628																									190	-26.5533	0.0291892		190	-14.2198	0.00468469	454.026
	190.5	-15.5181	0.00192514		190.5	-16.8164	0.0757219	360.984																									190.5	-19.4129	0.0299099		190.5	-3.18464	0.0313513	450.748
	191	-19.4129	0.00192514		191	-14.2198	0.0635294	336.902																									191	-29.799	0.0277477		191	-20.7111	0.0551352	447.723
	191.5	-13.5707	0.00192514		191.5	-3.83377	0.0545454	320.089																									191.5	-18.1146	0.0205405		191.5	-22.0094	0.0702703	445.646
	192	-14.2198	0.000641708		192	-23.3077	0.0545454	315.221																									192	-19.4129	0.00900901		192	-14.869	0.0832433	456.383
	192.5	-24.6059	-0.00449198		192.5	-17.4655	0.0583957	321.16																									192.5	-10.3251	-0.000360358		192.5	-16.8164	0.0861262	455.565
	193	-7.07942	-0.00641712		193	-17.4655	0.0596791	321.809																									193	-24.6059	-0.00828828		193	-23.3077	0.0796397	456.11
	193.5	-16.8164	-3.22237e-09		193.5	-18.1146	0.0596791	323.335																									193.5	-23.3077	-0.0205405		193.5	-9.67594	0.0724325	457.168
	194	-14.869	0.0147594		194	-3.83377	0.0571123	321.939																									194	-16.1672	-0.032072		194	-22.6585	0.0717118	341.383
	194.5	-9.02681	0.0340106		194.5	-10.3251	0.0551872	315.643																									194.5	-17.4655	-0.0371171		194.5	-6.43029	0.0702703	341.779
	195	-12.9216	0.0506952		195	-13.5707	0.0506952	306.912																									195	-18.7638	-0.0284684		195	-23.9568	0.0645046	342.103
	195.5	-16.8164	0.0558289		195.5	-13.5707	0.0410695	293.248																									195.5	-17.4655	-0.0147748		195.5	-13.5707	0.0572974	342.765
	196	-18.1146	0.0526204		196	-6.43029	0.0301604	272.67																									196	-13.5707	-0.009009		196	-20.7111	0.05009	328.121
	196.5	-20.062	0.0455615		196.5	-10.9742	0.017968	248.328																									196.5	-26.5533	-0.00396396		196.5	-7.07942	0.0414414	329.095
	197	-19.4129	0.0449198		197	-20.062	-0.00834224	204.09																									197	-22.0094	-0.0104505		197	-3.83377	0.0277477	330.237
	197.5	-14.2198	0.0506952		197.5	-10.9742	-0.0385027	143.201																									197.5	-31.7464	-0.0234234		197.5	-18.1146	0.0133333	332.113
	198	-22.0094	0.0571123		198	-10.9742	-0.0590375	91.9523																									198	-15.5181	-0.032072		198	-13.5707	0.00180181	300.234
	198.5	-20.062	0.0583957		198.5	-20.062	-0.0705882	62.4494																									198.5	-11.6233	-0.0313513		198.5	-15.5181	-0.0104505	301.572
	199	-18.1146	0.0558289		199	-19.4129	-0.0776471	44.6307																									199	-1.88638	-0.0205405		199	-10.9742	-0.0363964	304.285
	199.5	-10.3251	0.0506952		199.5	-7.07942	-0.0802139	35.8675																									199.5	-10.3251	-0.00468468		199.5	-25.9042	-0.0673874	307.913
	200	-25.9042	0.0506952		200	-18.1146	-0.0750802	42.1965																									200	-9.67594	0.00972973		200	-16.1672	-0.0918919	266.992
	200.5	-25.2551	0.0513368		200.5	-23.9568	-0.07123	53.6861																									200.5	-19.4129	0.0126126		200.5	-12.9216	-0.107027	269.362
	201	-12.9216	0.0513368		201	-16.8164	-0.0635294	65.9222																									201	-19.4129	0.00828829		201	-25.2551	-0.106306	269.686
	201.5	-11.6233	0.0410695		201.5	-19.4129	-0.0462032	93.6725																									201.5	-12.2725	0.00180181		201.5	-8.37768	-0.0918919	268.368
	202	-15.5181	0.028877		202	-24.6059	-0.0173262	143.72																									202	-9.67594	0.00108108		202	-5.13203	-0.0760361	350.691
	202.5	-15.5181	0.0218182		202.5	-23.3077	0.0115508	207.4																									202.5	-29.799	0.00540541		202.5	-9.02681	-0.0637837	349.107
	203	-6.43029	0.0218182		203	-14.2198	0.0385027	265.075																									203	-25.9042	0.0126126		203	-9.67594	-0.0457657	347.16
	203.5	-14.869	0.0320856		203.5	-19.4129	0.0571123	308.405																									203.5	-9.67594	0.0169369		203.5	-18.1146	-0.021982	344.68
	204	-12.9216	0.0404278		204	-18.1146	0.0718716	340.667																									204	-22.6585	0.0147748		204	9.14883	0.00756757	441.303
	204.5	-10.3251	0.0404278		204.5	-18.1146	0.0840642	367.313																									204.5	-8.37768	0.00756757		204.5	-21.3603	0.0371171	437.519
	205	-15.5181	0.0327272		205	-3.18464	0.0943315	388.475																									205	-0.588119	0.00540541		205	-15.5181	0.0616217	434.358
	205.5	-2.53551	0.0211765		205.5	-3.18464	0.102674	409.539																									205.5	-23.3077	0.00180181		205.5	-9.67594	0.0796397	431.865
	206	-23.3077	0.0147594		206	-10.3251	0.106524	419.633																									206	-13.5707	-0.00612612		206	-18.7638	0.0926126	460.219
	206.5	-7.72855	0.0134759		206.5	-1.23725	0.105241	419.146																									206.5	-14.869	-0.00828828		206.5	-19.4129	0.0983784	459.245
	207	-22.6585	0.0141176		207	-20.062	0.0988235	409.669																									207	-10.9742	-0.00684684		207	-21.3603	0.0990991	459.46
	207.5	-18.7638	0.0109091		207.5	-14.2198	0.0898396	392.337																									207.5	-25.2551	-0.00252252		207.5	-5.13203	0.0918919	459.732
	208	3.95579	0.00128342		208	-9.67594	0.0827808	373.026																									208	-25.9042	0.00108108		208	-17.4655	0.0796397	348.075
	208.5	-6.43029	-0.00320856		208.5	0.061011	0.0847058	375.492																									208.5	-18.7638	0.00252252		208.5	-9.02681	0.0774775	348.939
	209	-15.5181	-0.00641712		209	-0.588119	0.0891978	387.566																									209	-20.7111	0.00252252		209	-10.3251	0.0781982	349.016
	209.5	-14.869	-0.00449198		209.5	-22.0094	0.091123	388.8																									209.5	-3.18464	-0.00396396		209.5	-23.3077	0.078919	348.835
	210	-14.869	-3.22237e-09		210	-7.72855	0.0879144	386.982																									210	-15.5181	-0.0176576		210	-14.869	0.0760361	333.106
	210.5	-14.869	0.00962567		210.5	-19.4129	0.0827808	379.127																									210.5	-20.062	-0.0363964		210.5	-5.13203	0.0717118	333.424
	211	-7.72855	0.0243851		211	-22.6585	0.0789305	366.145																									211	-16.1672	-0.0551351		211	-3.83377	0.065946	334.184
	211.5	-15.5181	0.0359358		211.5	-12.2725	0.0757219	357.933																									211.5	-5.13203	-0.065946		211.5	-16.1672	0.0594595	334.787
	212	-18.1146	0.0442781		212	-12.9216	0.0731551	352.903																									212	-22.0094	-0.0637837		212	-21.3603	0.0508108	324.609
	212.5	-22.0094	0.0506952		212.5	-2.53551	0.07123	351.247																									212.5	-88.2207	-0.0508108		212.5	-10.9742	0.0457657	325.622
	213	-22.0094	0.0583957		213	-15.5181	0.0660962	343.458																									213	-21.3603	-0.0335135		213	-11.6233	0.0392792	326.388
	213.5	-22.0094	0.066738		213.5	-20.062	0.0609625	329.501																									213.5	0.061011	-0.0212612		213.5	-7.07942	0.0306306	326.972
	214	-14.2198	0.0718716		214	-18.1146	0.0545454	316.454																									214	-8.37768	-0.0154955		214	-20.062	0.0162162	319.176
	214.5	-17.4655	0.0744385		214.5	-12.2725	0.0391444	293.507																									214.5	-2.53551	-0.0212612		214.5	-7.72855	-0.00324324	321.513
	215	-16.1672	0.0718716		215	-26.5533	0.0224599	259.103																									215	-31.7464	-0.0241441		215	-18.7638	-0.0227027	323.694
	215.5	-16.1672	0.0616043		215.5	-17.4655	0.0121925	231.061																									215.5	-9.67594	-0.0263063		215.5	-23.9568	-0.0349549	325.401
	216	-10.3251	0.0558289		216	-22.0094	0.00705882	219.344																									216	-22.6585	-0.0255856		216	-14.869	-0.0443243	282.273
	216.5	-10.9742	0.057754		216.5	-18.1146	-0.000641714	211.522																									216.5	-19.4129	-0.0169369		216.5	-22.6585	-0.0522522	283.13
	217	-6.43029	0.0583957		217	-22.6585	-0.0128342	183.837																									217	-22.6585	0.00180181		217	-19.4129	-0.0536936	283.539
	217.5	-30.4481	0.0609625		217.5	-22.6585	-0.033369	145.051																									217.5	-2.53551	0.0205405		217.5	-3.18464	-0.0443243	283.214
	218	-28.5007	0.0641711		218	-22.0094	-0.0583957	95.8146																									218	-12.2725	0.032072		218	-5.13203	-0.0371171	352.243
	218.5	-7.72855	0.0583957		218.5	-19.4129	-0.0840642	42.8132																									218.5	-18.1146	0.0284684		218.5	-15.5181	-0.0428828	352.256
	219	-9.67594	0.0462032		219	-14.869	-0.103316	-6.0014																									219	-12.9216	0.0205405		219	-16.8164	-0.0493693	353.203
	219.5	-12.2725	0.0359358		219.5	-14.869	-0.106524	-23.1709																									219.5	-21.3603	0.0190991		219.5	-23.3077	-0.0479279	353.56
	220	-18.1146	0.0327272		220	-13.5707	-0.0943315	-2.20399																									220	-9.02681	0.021982		220	-25.9042	-0.0363964	357.228
	220.5	-8.37768	0.0359358		220.5	-15.5181	-0.0693048	40.8009																									220.5	-26.5533	0.0263063		220.5	0.061011	-0.0198198	354.923
	221	-22.6585	0.0346524		221	-7.72855	-0.0417113	94.1918																									221	-10.9742	0.0327928		221	-18.7638	-0.00684684	353.327
	221.5	-7.07942	0.0275935		221.5	-7.07942	-0.0121925	156.703																									221.5	-17.4655	0.0342342		221.5	-20.7111	0.00396397	352.158
	222	-18.1146	0.0186096		222	-22.0094	0.0166844	223.563																									222	-25.2551	0.0284684		222	-19.4129	0.0133333	416.253
	222.5	-12.9216	0.0141176		222.5	-17.4655	0.0436363	278.22																									222.5	-22.6585	0.0176576		222.5	-10.3251	0.0255856	414.702
	223	-11.6233	0.0128342		223	-22.0094	0.0628877	323.951																									223	-10.3251	0.00252252		223	-19.4129	0.0349549	413.891
	223.5	-19.4129	0.00770053		223.5	-8.37768	0.0770053	354.98																									223.5	-16.8164	-0.00612612		223.5	-12.2725	0.0371171	412.806
	224	-5.78116	0.00192514		224	-24.6059	0.0872728	376.499																									224	-34.992	-0.0104505		224	-8.37768	0.0385585	391.84
	224.5	-13.5707	-0.000641714		224.5	-7.72855	0.0917647	396.719																									224.5	-26.5533	-0.014054		224.5	-23.3077	0.032072	392.794
	225	-18.1146	0.00256684		225	-18.1146	0.0924064	393.214																									225	-7.72855	-0.0104505		225	-13.5707	0.0205405	393.729
	225.5	-24.6059	0.00449197		225.5	-20.062	0.0885562	388.67																									225.5	-16.8164	-0.009009		225.5	-22.0094	0.0154955	394.728
	226	-12.9216	0.00513368		226	-18.7638	0.0853476	382.276																									226	-22.6585	-0.0104505		226	-23.3077	0.0126126	323.129
	226.5	-14.869	0.0134759		226.5	-13.5707	0.0789305	371.565																									226.5	-16.1672	-0.0104505		226.5	-15.5181	0.0118919	323.415
	227	0.061011	0.0250267		227	-5.13203	0.0718716	354.428																									227	-11.6233	-0.0018018		227	-13.5707	-0.00108108	324.447
	227.5	-17.4655	0.033369		227.5	-9.67594	0.0673796	340.504																									227.5	2.65753	0.00828829		227.5	-15.5181	-0.0241441	327.076
	228	-25.2551	0.0372192		228	-20.062	0.0628877	333.202																									228	-23.3077	0.0111712		228	-29.799	-0.0486486	307.381
	228.5	-16.1672	0.0397861		228.5	-11.6233	0.0558289	317.265																									228.5	-9.02681	0.014054		228.5	-16.8164	-0.0724325	310.361
	229	-22.0094	0.0429947		229	-14.2198	0.0526204	309.086																									229	-20.062	0.0118919		229	-10.3251	-0.0933334	313.107
	229.5	-10.9742	0.0442781		229.5	-18.1146	0.0564706	314.896																									229.5	-20.7111	0.00684685		229.5	-116.782	-0.107748	315.437
	230	-16.8164	0.0449198		230	-17.4655	0.0590375	322.393																									230	-22.6585	0.00396397		230	-27.8516	-0.118559	275.1
	230.5	-27.8516	0.0506952		230.5	-7.07942	0.0545454	318.856																									230.5	1.35927	0.00828829		230.5	6.55231	-0.12	275.996
	231	-147.292	0.0564706		231	-0.588119	0.0513368	310.774																									231	-15.5181	0.0147748		231	-3.18464	-0.107748	274.918
	231.5	-14.2198	0.062246		231.5	-21.3603	0.04877	306.457																									231.5	-16.1672	0.0198198		231.5	-16.8164	-0.089009	272.711
	232	-9.67594	0.0628877		232	-24.6059	0.0442781	296.201																									232	-7.72855	0.027027		232	-9.02681	-0.070991	395.319
	232.5	-0.588119	0.0641711		232.5	-15.5181	0.0365776	281.141																									232.5	-19.4129	0.0342342		232.5	-16.1672	-0.0536936	393.164
	233	-27.8516	0.0654546		233	-16.8164	0.028877	265.367																									233	-19.4129	0.0414414		233	-15.5181	-0.0263063	390.015
	233.5	-17.4655	0.066738		233.5	-35.6411	0.0224599	253.715																									233.5	-19.4129	0.0558558		233.5	-12.9216	0.0111712	386.465
	234	-14.2198	0.068663		234	-10.3251	0.0128342	235.378																									234	-18.1146	0.0630631		234	-11.6233	0.0472072	474.072
	234.5	-11.6233	0.0699466		234.5	-12.2725	-0.00128342	208.99																									234.5	-5.13203	0.0630631		234.5	-18.1146	0.0724325	470.339
	235	-16.8164	0.0737968		235	-6.43029	-0.0141176	178.384																									235	-25.2551	0.0594595		235	-9.02681	0.0854054	468.905
	235.5	-18.7638	0.0737968		235.5	-19.4129	-0.0269519	149.952																									235.5	-6.43029	0.0536936		235.5	-10.3251	0.089009	467.911
	236	-10.9742	0.0680214		236	-20.062	-0.0359358	132.231																									236	-1.88638	0.0472072		236	-15.5181	0.0832433	424.997
	236.5	-5.78116	0.0641711		236.5	-107.695	-0.0455615	112.595																									236.5	-1.23725	0.0436036		236.5	-13.5707	0.0760361	425.77
	237	-14.869	0.0609625		237	-24.6059	-0.0571123	91.8549																									237	-9.67594	0.0421621		237	-21.3603	0.0695496	426.562
	237.5	-17.4655	0.0596791		237.5	5.90318	-0.0635294	71.7644																									237.5	-18.1146	0.0385585		237.5	-4.4829	0.0681082	427.47
	238	-13.5707	0.0564706		238	-16.8164	-0.0603209	73.4846																									238	-9.02681	0.027027		238	-19.4129	0.0702703	322.792
	238.5	-14.869	0.0494118		238.5	-16.8164	-0.0468449	98.119																									238.5	-25.2551	0.0162162		238.5	-13.5707	0.0724325	322.506
	239	-16.1672	0.0417113		239	-10.3251	-0.0231016	140.312																									239	-0.588119	0.014054		239	-20.062	0.0688289	322.701
	239.5	-7.72855	0.0352942		239.5	-6.43029	0.00705882	200.552																									239.5	-19.4129	0.0190991		239.5	-10.9742	0.060901	323.512
	240	-23.3077	0.0218182		240	4.60492	0.0352942	259.558																									240	-19.4129	0.0227027		240	-13.5707	0.0551352	338.767
	240.5	-12.2725	0.0166844		240.5	-12.2725	0.0583957	316.779																									240.5	-16.8164	0.0176576		240.5	-11.6233	0.0421621	340.143
	241	-10.9742	0.0141176		241	-12.2725	0.0763637	351.767																									241	-18.1146	0.00180181		241	-27.2024	0.0212612	342.395
	241.5	-19.4129	0.0173262		241.5	-4.4829	0.0872728	381.789																									241.5	-11.6233	-0.0111712		241.5	-17.4655	0.00252252	344.765
	242	-12.2725	0.0263101		242	-16.8164	0.0917647	390.585																									242	-10.3251	-0.0126126		242	-16.1672	-0.021982	280.468
	242.5	-12.2725	0.0340106		242.5	-7.07942	0.0924064	397.206																									242.5	1.35927	-0.00828828		242.5	-13.5707	-0.0428828	282.922
	243	-18.7638	0.037861		243	-24.6059	0.0936899	393.311																									243	-16.1672	-0.0212612		243	-12.9216	-0.0616216	285.538
	243.5	-28.5007	0.0397861		243.5	-10.3251	0.0949733	399.121																									243.5	-18.1146	-0.0356756		243.5	-21.3603	-0.0760361	287.33
	244	-20.7111	0.037861		244	-11.6233	0.0936899	401.036																									244	-22.0094	-0.0414414		244	-18.1146	-0.0882883	277.696
	244.5	-12.9216	0.0372192		244.5	-12.2725	0.0930481	395.81																									244.5	-33.0446	-0.0356756		244.5	-29.799	-0.083964	278.073
	245	-14.2198	0.0340106		245	-12.2725	0.091123	390.163																									245	-14.869	-0.027027		245	-10.9742	-0.0695496	276.866
	245.5	-16.8164	0.0263101		245.5	-16.8164	0.0853476	380.263																									245.5	-13.5707	-0.0255856		245.5	-14.869	-0.0493693	274.548
	246	-15.5181	0.0243851		246	-16.8164	0.082139	374.486																									246	-10.9742	-0.027027		246	-24.6059	-0.0299099	400.142
	246.5	-7.72855	0.0301604		246.5	-14.2198	0.0859892	376.109																									246.5	-31.0972	-0.0284684		246.5	-19.4129	-0.0133333	397.883
	247	-16.1672	0.0397861		247	-14.2198	0.0879144	383.412																									247	-22.6585	-0.0241441		247	-42.7816	-0.00612612	396.637
	247.5	-12.9216	0.0455615		247.5	-23.9568	0.0872728	386.885																									247.5	-13.5707	-0.0154955		247.5	-21.3603	0.00684685	395.345
	248	-12.9216	0.0442781		248	-18.1146	0.0834224	376.628																									248	-9.67594	-0.0104505		248	-16.8164	0.021982	419.447
	248.5	-16.8164	0.0385027		248.5	-9.67594	0.0789305	372.02																									248.5	-21.3603	-0.00828828		248.5	-21.3603	0.0385585	417.389
	249	-19.4129	0.0397861		249	-18.7638	0.0750802	361.763																									249	-14.2198	-0.0054054		249	-15.5181	0.0544145	415.163
	249.5	-16.1672	0.0391444		249.5	-22.6585	0.0680214	348.813																									249.5	-16.8164	-0.000360358		249.5	-9.67594	0.065946	413.488
	250	-6.43029	0.0404278		250	-7.72855	0.0583957	331.806																									250	-20.7111	0.00828829		250	-20.7111	0.0724325	415.676
	250.5	-12.2725	0.0455615		250.5	-1.88638	0.0474866	307.528																									250.5	-22.6585	0.0176576		250.5	-16.8164	0.0745946	415.267
	251	-25.2551	0.0506952		251	-19.4129	0.0352942	283.64																									251	-18.7638	0.0248648		251	-12.2725	0.0717118	415.422
	251.5	-16.8164	0.0539038		251.5	-7.72855	0.0211765	257.416																									251.5	-19.4129	0.027027		251.5	-12.9216	0.0645046	416.059
	252	-11.6233	0.053262		252	-9.67594	0.000641708	217.754																									252	-7.72855	0.0284684		252	-12.9216	0.0558558	343.583
	252.5	-3.83377	0.0462032		252.5	-9.67594	-0.028877	161.344																									252.5	-34.992	0.0291892		252.5	-20.062	0.0443243	344.687
	253	-22.0094	0.0346524		253	-26.5533	-0.057754	98.8006																									253	-25.9042	0.0356756		253	-18.7638	0.0371171	345.907
	253.5	-19.4129	0.0224599		253.5	-18.1146	-0.0802139	48.6553																									253.5	-9.02681	0.0392792		253.5	-15.5181	0.0371171	346.368
	254	-12.9216	0.0173262		254	-18.1146	-0.0956149	9.74																									254	-9.02681	0.0407207		254	-16.8164	0.0385585	319.117
	254.5	-13.5707	0.0121925		254.5	-20.7111	-0.112941	-22.9762																									254.5	-14.2198	0.0356756		254.5	5.90318	0.0356756	319.403
	255	-20.7111	0.00962567		255	-3.83377	-0.11615	-38.2632																									255	-10.9742	0.0306306		255	-30.4481	0.0263063	320.098
	255.5	-10.3251	0.00962567		255.5	-9.67594	-0.103316	-23.1709																									255.5	-15.5181	0.0299099		255.5	-13.5707	0.0169369	320.993
	256	-24.6059	0.0109091		256	-20.062	-0.082139	17.3673																									256	-20.7111	0.0284684		256	-22.6585	0.00612613	328.627
	256.5	-14.869	0.0121925		256.5	-14.869	-0.0558289	71.2775																									256.5	-12.2725	0.0277477		256.5	-33.0446	-0.0018018	329.594
	257	-11.6233	0.0147594		257	-18.7638	-0.0269519	130.576																									257	-27.2024	0.0176576		257	-16.1672	-0.0205405	331.444
	257.5	-9.67594	0.0141176		257.5	-18.1146	0.00834224	195.391																									257.5	-12.9216	0.00252252		257.5	-9.67594	-0.0486486	334.898
	258	-24.6059	0.00192514		258	-13.5707	0.0410695	270.69																									258	-23.9568	-0.0147748		258	-0.588119	-0.0724325	276.827
	258.5	-23.9568	-0.0121925		258.5	-17.4655	0.0673796	329.664																									258.5	-13.5707	-0.0291892		258.5	-14.869	-0.0781982	278.398
	259	-22.6585	-0.0186096		259	-16.8164	0.0840642	370.851																									259	-7.07942	-0.0407207		259	-14.869	-0.0717118	277.872
	259.5	-19.4129	-0.017968		259.5	-5.78116	0.0981818	400.808																									259.5	-18.1146	-0.0479279		259.5	-21.3603	-0.0637837	277.21
	260	-15.5181	-0.0186096		260	-1.23725	0.109733	424.372																									260	-3.83377	-0.0479279		260	-16.1672	-0.0623423	358.228
	260.5	-23.9568	-0.0256685		260.5	-18.7638	0.115508	443.651																									260.5	-10.9742	-0.0522522		260.5	-17.4655	-0.0601801	358.292
	261	-12.9216	-0.0263101		261	-16.1672	0.112299	443.813																									261	-23.3077	-0.058018		261	-12.2725	-0.0565765	358.137
	261.5	-20.7111	-0.0186096		261.5	-7.72855	0.105241	422.911																									261.5	-9.67594	-0.058018		261.5	-5.78116	-0.0428828	356.877
	262	-17.4655	-0.00320856		262	-14.869	0.0975401	407.008																									262	-3.83377	-0.0601801		262	-25.9042	-0.0241441	388.49
	262.5	-5.13203	0.0128342		262.5	-6.43029	0.0904813	394.187																									262.5	-17.4655	-0.0695496		262.5	-18.7638	-0.00108108	385.835
	263	-20.062	0.0295187		263	-18.7638	0.0885562	384.71																									263	-17.4655	-0.0760361		263	-21.3603	0.014054	383.466
	263.5	-15.5181	0.0449198		263.5	-16.8164	0.0847058	380.75																									263.5	-14.2198	-0.070991		263.5	-22.6585	0.0234234	381.772
	264	-16.1672	0.0583957		264	-6.43029	0.0827808	376.791																									264	-18.1146	-0.0443243		264	-12.2725	0.0378378	430.307
	264.5	-16.1672	0.0680214		264.5	-13.5707	0.0789305	371.825																									264.5	-7.72855	-0.0133333		264.5	-16.1672	0.0515315	428.639
	265	-15.5181	0.0770053		265	-16.8164	0.0757219	363.613																									265	3.30666	0.0147748		265	-29.1498	0.0623424	427.386
	265.5	-16.8164	0.0827808		265.5	-20.7111	0.0718716	357.284																									265.5	-28.5007	0.0385585		265.5	-13.5707	0.0652253	426.523
	266	-22.0094	0.0879144		266	-20.062	0.07123	352.578																									266	-14.869	0.0544145		266	-15.5181	0.060901	388.263
	266.5	-9.67594	0.0904813		266.5	-8.37768	0.0673796	346.054																									266.5	-7.72855	0.0616217		266.5	-18.1146	0.0565766	388.535
	267	-18.7638	0.0904813		267	-3.18464	0.0616043	333.202																									267	-9.02681	0.0623424		267	-23.3077	0.05009	389.288
	267.5	-4.4829	0.0891978		267.5	-24.6059	0.0590375	329.177																									267.5	-15.5181	0.0623424		267.5	3.30666	0.045045	390.639
	268	-16.1672	0.0879144		268	-15.5181	0.0564706	325.477																									268	-16.8164	0.0630631		268	-18.7638	0.0421621	328.069
	268.5	-14.2198	0.082139		268.5	-6.43029	0.0474866	306.328																									268.5	-21.3603	0.0652253		268.5	-23.3077	0.0421621	327.751
	269	-16.1672	0.0763637		269	-20.7111	0.0365776	283.965																									269	-17.4655	0.065946		269	-20.7111	0.04	327.887
	269.5	-11.6233	0.07123		269.5	-18.7638	0.0269519	268.094																									269.5	-19.4129	0.0630631		269.5	-25.2551	0.0342342	328.699
	270	-17.4655	0.0693048		270	-25.2551	0.0160428	244.628																									270	-18.1146	0.0645046		270	-19.4129	0.014054	336.852
	270.5	-5.78116	0.0673796		270.5	-93.4137	0.00128342	218.695																									270.5	-23.9568	0.0666667		270.5	-30.4481	-0.0104505	339.675
	271	-11.6233	0.0680214		271	-35.6411	-0.0186096	176.209																									271	-16.8164	0.0630631		271	-29.1498	-0.0349549	343.181
	271.5	-20.062	0.068663		271.5	0.061011	-0.037861	139.371																									271.5	-10.9742	0.0580181		271.5	-24.6059	-0.058018	346.29
	272	2.65753	0.0648128		272	0.710141	-0.0539038	101.592																									272	-17.4655	0.0508108		272	-16.8164	-0.0767568	251.777
	272.5	-5.13203	0.0596791		272.5	-20.7111	-0.0686632	67.3503																									272.5	-11.6233	0.0457657		272.5	-22.0094	-0.0825226	253.062
	273	-19.4129	0.0571123		273	-9.67594	-0.0744385	49.3694																									273	-7.72855	0.0436036		273	-20.7111	-0.0781982	252.783
	273.5	-9.02681	0.0506952		273.5	-11.6233	-0.0718716	53.394																									273.5	-12.2725	0.0443243		273.5	-14.2198	-0.0731532	252.303
	274	-4.4829	0.0404278		274	-16.8164	-0.062246	67.9345																									274	-7.07942	0.0436036		274	-26.5533	-0.0666667	357.819
	274.5	-19.4129	0.0282353		274.5	-14.2198	-0.0449198	100.488																									274.5	-12.9216	0.0436036		274.5	-15.5181	-0.0623423	357.403
	275	-21.3603	0.017968		275	-18.7638	-0.0231016	143.656																									275	-22.6585	0.0371171		275	-24.6059	-0.05009	356.241
	275.5	-15.5181	0.00705882		275.5	-15.5181	-0.00192514	183.642																									275.5	-23.3077	0.027027		275.5	-15.5181	-0.0227027	353.489
	276	-22.6585	-0.00320856		276	-12.9216	0.0224599	238.98																									276	-12.9216	0.0183784		276	-12.9216	0.0104505	425.25
	276.5	-14.2198	-0.00898396		276.5	-15.5181	0.0481283	290.164																									276.5	-16.8164	0.00540541		276.5	-13.5707	0.0407207	421.667
	277	-3.18464	-0.00834224		277	-10.9742	0.0654546	333.299																									277	-17.4655	-0.014054		277	-24.6059	0.0645046	417.883
	277.5	-15.5181	-0.00641712		277.5	-18.1146	0.0782887	360.66																									277.5	-20.062	-0.032072		277.5	-16.1672	0.078919	415.643
	278	-73.9398	-0.00898396		278	-7.72855	0.0879144	378.77																									278	-20.062	-0.0436036		278	-12.9216	0.0846847	459.596
	278.5	-5.13203	-0.017968		278.5	-17.4655	0.091123	388.507																									278.5	-21.3603	-0.058018		278.5	-26.5533	0.0854054	460.05
	279	0.061011	-0.0231016		279	-3.83377	0.091123	396.427																									279	-103.8	-0.0688289		279	-23.9568	0.0774775	460.135
	279.5	-5.78116	-0.0173262		279.5	-11.6233	0.0898396	393.7																									279.5	-9.67594	-0.0753154		279.5	-22.0094	0.070991	461.381
	280	-10.9742	-0.0102674		280	-10.3251	0.0917647	392.5																									280	9.14883	-0.0731532		280	-10.3251	0.0666667	332.788
	280.5	-19.4129	-0.00641712		280.5	-14.2198	0.0936899	398.342																									280.5	-7.72855	-0.0745946		280.5	-9.67594	0.0637838	333.431
	281	-17.4655	-0.000641714		281	-13.5707	0.0956149	406.618																									281	-23.9568	-0.0767568		281	-23.3077	0.0601802	333.794
	281.5	-16.1672	0.00641711		281.5	-9.02681	0.0930481	403.372																									281.5	-14.869	-0.0781982		281.5	-27.2024	0.0565766	334.456
	282	-1.88638	0.0173262		282	-14.869	0.0891978	389.838																									282	-10.9742	-0.0810811		282	-18.7638	0.0522522	329.932
	282.5	-10.9742	0.0301604		282.5	-9.02681	0.0847058	382.925																									282.5	-2.53551	-0.0818018		282.5	-23.3077	0.0486486	330.25
	283	-16.8164	0.0385027		283	0.061011	0.0782887	372.539																									283	-3.83377	-0.0688289		283	-23.3077	0.0414414	331.172
	283.5	-15.5181	0.0429947		283.5	-25.9042	0.0750802	360.66																									283.5	-19.4129	-0.0392792		283.5	-18.1146	0.0306306	332.34
	284	-16.1672	0.0417113		284	-18.1146	0.0744385	361.017																									284	-9.67594	0.000360366		284	-0.588119	0.0291892	321.428
	284.5	-13.5707	0.0449198		284.5	-4.4829	0.0776471	364.36																									284.5	-14.869	0.0392792		284.5	-23.9568	0.0284684	321.688
	285	-19.4129	0.0558289		285	-10.3251	0.0776471	365.561																									285	-14.869	0.0681082		285	-6.43029	0.0241441	322.103
	285.5	-15.5181	0.068663		285.5	-11.6233	0.0725134	358.81																									285.5	-27.2024	0.089009		285.5	-12.9216	0.014054	323.058
	286	-23.3077	0.0757219		286	-7.07942	0.0660962	345.34																									286	-15.5181	0.0962162		286	-23.3077	0.00108108	332.464
	286.5	-12.2725	0.0757219		286.5	-14.2198	0.0571123	329.664																									286.5	-23.3077	0.0940541		286.5	-18.7638	-0.014054	334.463
	287	-15.5181	0.0725134		287	-12.9216	0.0526204	316.292																									287	-20.062	0.089009		287	-14.2198	-0.0306306	336.482
	287.5	-16.8164	0.0699466		287.5	-1.88638	0.0474866	304.737																									287.5	-14.2198	0.0875676		287.5	-11.6233	-0.0457657	338.423
	288	-25.2551	0.0693048		288	-8.37768	0.0442781	296.461																									288	-22.6585	0.0875676		288	-29.1498	-0.0637837	288.498
	288.5	-3.18464	0.07123		288.5	-16.8164	0.0320856	280.817																									288.5	-12.9216	0.0818018		288.5	-6.43029	-0.078919	291.244
	289	-4.4829	0.07123		289	-27.2024	0.0173262	251.736																									289	-11.6233	0.0781982		289	-7.07942	-0.0897298	292.49
	289.5	-16.8164	0.0660962		289.5	-12.9216	-0.0115508	199.481																									289.5	-14.869	0.0745946		289.5	-20.062	-0.0954955	293.464
	290	-13.5707	0.0660962		290	-18.1146	-0.0474866	125.61																									290	-6.43029	0.0688289		290	-10.9742	-0.0882883	315.93
	290.5	-15.5181	0.0673796		290.5	-21.3603	-0.0750802	61.1836																									290.5	-14.2198	0.0645046		290.5	-4.4829	-0.0724325	314.028
	291	-20.7111	0.07123		291	-12.9216	-0.0859894	29.2464																									291	-1.23725	0.0572974		291	-10.3251	-0.058018	312.113
	291.5	-16.8164	0.0782887		291.5	-7.07942	-0.0872728	21.4243																									291.5	-15.5181	0.0486486		291.5	-13.5707	-0.0407207	310.088
	292	-13.5707	0.082139		292	-9.67594	-0.0891979	18.9252																									292	-1.23725	0.0385585		292	-12.9216	-0.0227027	429.281
	292.5	-19.4129	0.0782887		292.5	-7.07942	-0.10139	-2.13908																									292.5	-19.4129	0.0335135		292.5	-14.869	-0.00684684	427.035
	293	-14.2198	0.068663		293	-16.8164	-0.104599	-21.3858																									293	-21.3603	0.0335135		293	-33.0446	0.00612613	425.315
	293.5	-12.2725	0.062246		293.5	-9.02681	-0.0840642	7.5005																									293.5	-18.7638	0.0284684		293.5	-17.4655	0.0190991	423.426
	294	-20.7111	0.0564706		294	-10.9742	-0.0442781	86.1426																									294	-22.6585	0.0241441		294	-17.4655	0.0248648	422.647
	294.5	-17.4655	0.0455615		294.5	-18.1146	0.00192514	179.552																									294.5	-16.8164	0.021982		294.5	-13.5707	0.0263063	422.122
	295	-14.869	0.0352942		295	-11.6233	0.0365776	257.578																									295	-16.1672	0.0169369		295	-25.2551	0.0234234	422.53
	295.5	-6.43029	0.0282353		295.5	-1.23725	0.0545454	313.176																									295.5	-3.83377	0.00972973		295.5	-34.3429	0.0234234	422.68
	296	-12.2725	0.019893		296	-18.7638	0.0648128	332.812																									296	-17.4655	0.000360366		296	-8.37768	0.0234234	357.884
	296.5	-3.18464	0.0057754		296.5	-11.6233	0.0654546	341.608																									296.5	-19.4129	-0.0118919		296.5	-16.8164	0.0241441	357.812
	297	-12.2725	-0.00577541		297	-21.3603	0.0680214	347.288																									297	-16.8164	-0.0313513		297	-16.1672	0.0227027	358.429
	297.5	-15.5181	-0.00705883		297.5	-23.3077	0.07123	351.572																									297.5	-7.07942	-0.058018		297.5	-8.37768	0.0169369	358.474
	298	-4.4829	-0.00641712		298	-25.2551	0.0789305	363.776																									298	-25.2551	-0.0846847		298	-5.78116	0.00108108	340.487
	298.5	-0.588119	-0.0109091		298.5	-12.2725	0.0872728	384.613																									298.5	-20.7111	-0.0983784		298.5	-20.7111	-0.0118919	342.298
	299	-21.3603	-0.0224599		299	-14.869	0.0924064	397.206																									299	-9.67594	-0.0940541		299	-20.062	-0.0212612	343.668
	299.5	-9.02681	-0.028877		299.5	-13.5707	0.0930481	402.172																									299.5	-18.1146	-0.0897298		299.5	-18.1146	-0.0263063	344.466
	300	-23.9568	-0.028877		300	-15.5181	0.091123	397.4																									300	-9.02681	-0.0954955		300	-27.8516	-0.0335135	309.686
