# Supplementary material for: Analogue closed-loop optogenetic modulation of hippocampal pyramidal cells dissociates gamma frequency and amplitude
Source: eLife. 2018 Oct 23;7:e38346. doi: 10.7554/eLife.38346 (PMC6219844; doi:10.7554/eLife.38346)
Supplement: Figure 5—source data 1. [file elife-38346-fig5-data1.xlsx]

## Sheet: Sheet1
Panel a													Panel b										Panel c											Panel d
	Pre-clamp				During clamp				Post-clamp
	Time (ms)	LFP (mV)	Current (pA)		Time (ms)	LFP (mV)	Current (pA)		Time (ms)	LFP (mV)	Current (pA)			Time (ms)	Unclamped average LFP (mV)	Unclamped average phasic membrane current (pA)		Time (ms)	Clamped average LFP (mV)	Clamped average phasic membrane current (pA)	LED average driver command (norm.)			Phase (º)	Unclamped excitatory current (pA)	Average vector magnitude (pA)	1.50459		Phase (º)	Clamped excitatory current (pA)	Average vector magnitude (pA)	3.51506			Difference vector magnitude (pA)	4.75281
	0	0.0614746	-70.5071		0	0.0458955	-153.661		0	0.151055	-123.152			0	-0.145064	-1.756		0	-0.0720261	-3.228	-0.535072			0	1.386	Angle (º)	96.3731		0	2.875	Angle (º)	-124.735			Angle (º)	-112.722
	0.5	0.0471938	-67.7158		0.5	0.0212286	-154.569		0.5	0.163388	-124.19			0.174978	-0.145064	-1.756		0.105152	-0.0720261	-3.228	-0.535072			3.6	1.386				3.6	2.875
	1	0.0322638	-70.7667		1	-0.0190175	-142.95		1	0.155598	-123.476			0.349956	-0.145064	-1.756		0.210305	-0.0720261	-3.228	-0.535072			7.2	1.386				7.2	2.875					LED-LFP phase difference (º)	82.6778
	1.5	0.023176	-72.8439		1.5	-0.0800357	-141.782		1.5	0.140668	-124.58			0.524934	-0.137956	-2.279		0.315457	-0.0720261	-3.228	-0.535072			10.8	2.52				10.8	2.875
	2	0.0108425	-68.0404		2	-0.1443	-142.041		2	0.125738	-119.062			0.699913	-0.129026	-2.072		0.42061	-0.0724982	-3.294	-0.492308			14.4	3.246				14.4	2.77
	2.5	0.00435118	-70.1825		2.5	-0.18909	-138.536		2.5	0.108861	-118.802			0.874891	-0.128112	-1.972		0.525762	-0.0659648	-1.828	-0.00103277			18	3.246				18	0.958
	3	-0.00538577	-69.0141		3	-0.18909	-135.68		3	0.0971768	-116.53			1.04987	-0.109093	-2.529		0.630915	-0.0626011	-1.145	0.105473			21.6	4.14				21.6	0.567
	3.5	-0.00992968	-65.8982		3.5	-0.137159	-133.797		3.5	0.0887381	-118.023			1.22485	-0.088555	-2.425		0.736067	-0.0626011	-1.145	0.105473			25.2	4.099				25.2	0.567
	4	-0.0248597	-68.3		4	-0.134563	-139.12		4	0.0822468	-117.894			1.39983	-0.0855137	-2.323		0.84122	-0.0619773	-1.187	0.180221			28.8	4.231				28.8	0.464
	4.5	-0.0469301	-67.0667		4.5	-0.142352	-142.625		4.5	0.0744572	-118.543			1.5748	-0.0687934	-2.406		0.946372	-0.0583523	-1.185	0.233496			32.4	3.758				32.4	0.597
	5	-0.0852288	-69.0141		5	-0.103404	-138.146		5	0.0660185	-115.427			1.74978	-0.0486684	-2.744		1.05152	-0.0414327	-0.834	0.711916			36	4.274				36	0.744
	5.5	-0.133914	-68.1053		5.5	-0.0339475	-126.462		5.5	0.0562816	-119.127			1.92476	-0.0435357	-2.697		1.15668	-0.0367202	-0.6	0.812239			39.6	4.236				39.6	0.614
	6	-0.174809	-69.1439		6	0.0387551	-132.369		6	0.0407025	-120.49			2.09974	-0.0311463	-2.855		1.26183	-0.0316199	-0.395	0.847068			43.2	5.306				43.2	0.481
	6.5	-0.195581	-74.7264		6.5	0.0965276	-138.276		6.5	0.023176	-122.308			2.27472	-0.0157603	-2.933		1.36698	-0.0307347	0	0.834378			46.8	6.087				46.8	0.345
	7	-0.205318	-74.272		7	0.128335	-140.938		7	0.0140881	-123.346			2.44969	-0.00718794	-2.858		1.47213	-0.0260728	-0.209	0.859208			50.4	6.39				50.4	0.045
	7.5	-0.198177	-75.8299		7.5	0.128335	-142.69		7.5	0.0114916	-124.904			2.62467	0.0038456	-2.306		1.57729	-0.0148184	-0.579	0.794605			54	6.416				54	0
	8	-0.176107	-74.7913		8	0.10951	-144.313		8	0.00240379	-122.762			2.79965	0.0162266	-2.822		1.68244	-0.00963379	-0.864	0.791395			57.6	6.65				57.6	0.175
	8.5	-0.11379	-71.6106		8.5	0.0867907	-145.092		8.5	-0.0157718	-127.501			2.97463	0.0289545	-3.345		1.78759	-0.00671692	-1.336	0.762658			61.2	6.715				61.2	0.39
	9	-0.0475792	-76.0896		9	0.0679659	-148.987		9	-0.0320001	-126.592			3.14961	0.04416	-3.664		1.89274	-0.00421313	-1.302	0.743577			64.8	7.123				64.8	0.425
	9.5	-0.0300527	-73.8825		9.5	0.0523868	-148.792		9.5	-0.0482283	-122.957			3.32458	0.0602934	-3.951		1.9979	-0.00278842	-1.359	0.67829			68.4	6.302				68.4	0.446
	10	-0.000841855	-68.4298		10	0.0368077	-144.638		10	-0.0586144	-127.176			3.49956	0.0804246	-3.239		2.10305	0.00717615	-1.389	0.768206			72	6.268				72	0.793
	10.5	0.0621238	-69.2737		10.5	0.0179829	-144.768		10.5	-0.066404	-123.606			3.67454	0.0882608	-2.948		2.2082	0.0095029	-1.296	0.816603			75.6	6.231				75.6	0.82
	11	0.12444	-66.2228		11	-0.000841855	-140.873		11	-0.071597	-119.192			3.84952	0.104653	-3.155		2.31335	0.0155727	-1.21	0.793549			79.2	6.532				79.2	0.687
	11.5	0.160142	-70.9614		11.5	-0.00992968	-146.39		11.5	-0.0839305	-129.059			4.0245	0.122782	-3.012		2.41851	0.0203695	-1.057	0.839377			82.8	7.396				82.8	0.862
	12	0.165985	-75.5703		12	-0.0229123	-140.483		12	-0.096264	-138.796			4.19948	0.1328	-3.313		2.52366	0.0283108	-0.99	0.779785			86.4	7.108				86.4	1.227
	12.5	0.148458	-69.2088		12.5	-0.0397897	-139.899		12.5	-0.107948	-133.992			4.37445	0.149236	-3.412		2.62881	0.0342036	-0.701	0.788752			90	6.754				90	1.33
	13	0.128984	-72.3895		13	-0.0475792	-133.667		13	-0.0787375	-140.029			4.54943	0.155427	-3.156		2.73396	0.0342036	-0.701	0.788752			93.6	6.631				93.6	1.33
	13.5	0.112107	-73.9475		13.5	-0.0508249	-132.824		13.5	-0.0488775	-130.876			4.72441	0.160836	-2.665		2.83912	0.0411838	-0.972	0.859685			97.2	6.257				97.2	1.859
	14	0.0958785	-72.9089		14	-0.0475792	-125.683		14	-0.071597	-124.904			4.89939	0.168577	-2.552		2.94427	0.0509123	-1.418	0.895825			100.8	6.461				100.8	1.91
	14.5	0.0796503	-71.6755		14.5	-0.0307018	-125.748		14.5	-0.0806849	-133.992			5.07437	0.170228	-2.57		3.04942	0.0557935	-1.531	0.89859			104.4	6.486				104.4	2.487
	15	0.0686151	-72.0001		15	-0.0144736	-125.748		15	-0.046281	-132.304			5.24934	0.173102	-2.772		3.15457	0.0633976	-2.363	0.956388			108	6.354				108	3.128
	15.5	0.058229	-67.1965		15.5	0.00629857	-128.474		15.5	0.013439	-132.304			5.42432	0.175326	-2.958		3.25973	0.0664662	-2.467	0.949869			111.6	6.435				111.6	3.243
	16	0.0478429	-63.4965		16	0.0290181	-122.957		16	0.0588781	-121.659			5.5993	0.174721	-3.106		3.36488	0.0796848	-3.078	1			115.2	6.307				115.2	3.897
	16.5	0.0387551	-67.3912		16.5	0.0497903	-129.383		16.5	0.0900363	-125.099			5.77428	0.175536	-3.25		3.47003	0.0796848	-3.078	1			118.8	6.171				118.8	3.897
	17	0.0277199	-69.2088		17	0.0621238	-128.929		17	0.105615	-131.395			5.94926	0.174733	-3.13		3.57518	0.0898349	-2.996	0.982317			122.4	5.761				122.4	4.343
	17.5	0.013439	-68.7544		17.5	0.0692642	-126.657		17.5	0.104317	-132.434			6.12423	0.173958	-3.185		3.68034	0.0975738	-3.053	0.915346			126	5.339				126	4.599
	18	-0.00538577	-67.3263		18	0.0770538	-122.048		18	0.0965276	-129.448			6.29921	0.173237	-2.93		3.78549	0.100609	-3.279	0.918428			129.6	4.94				129.6	4.768
	18.5	-0.0255088	-71.8702		18.5	0.0738081	-125.099		18.5	0.0861416	-133.408			6.47419	0.171279	-3.169		3.89064	0.109073	-4.697	0.799342			133.2	5.014				133.2	5.637
	19	-0.051474	-68.6895		19	0.0621238	-127.695		19	0.0757555	-136.134			6.64917	0.17054	-2.977		3.99579	0.109933	-4.656	0.787042			136.8	4.945				136.8	5.744
	19.5	-0.0754918	-70.572		19.5	0.0445972	-129.383		19.5	0.0757555	-136.848			6.82415	0.16699	-2.803		4.10095	0.118515	-5.963	0.78739			140.4	4.862				140.4	7.006
	20	-0.100808	-67.1316		20	0.0244742	-130.162		20	0.0764046	-132.369			6.99913	0.165664	-3.682		4.2061	0.125672	-6.329	0.717355			144	4.358				144	7.635
	20.5	-0.126124	-71.8702		20.5	0.00370205	-124.32		20.5	0.0770538	-136.134			7.1741	0.164761	-3.593		4.31125	0.127982	-6.289	0.609481			147.6	4.567				147.6	7.796
	21	-0.156633	-67.7158		21	-0.016421	-120.166		21	0.0738081	-129.513			7.34908	0.160779	-3.591		4.4164	0.129364	-6.472	0.578529			151.2	4.19				151.2	7.819
	21.5	-0.185195	-72.3246		21.5	-0.031351	-122.957		21.5	0.0653694	-128.994			7.52406	0.157946	-3.031		4.52156	0.136665	-7.41	0.419956			154.8	4.053				154.8	8.785
	22	-0.204669	-63.107		22	-0.0352457	-118.348		22	0.0595272	-126.981			7.69904	0.156506	-3.144		4.62671	0.137407	-7.809	0.38854			158.4	4.083				158.4	9.007
	22.5	-0.205967	-68.4298		22.5	-0.0404388	-119.646		22.5	0.0556325	-132.953			7.87402	0.153319	-2.748		4.73186	0.141074	-8.288	0.273116			162	3.059				162	9.661
	23	-0.192984	-63.1719		23	-0.0488775	-115.946		23	0.0471938	-130.227			8.04899	0.148878	-2.916		4.83701	0.140964	-9.055	0.252851			165.6	2.781				165.6	10.247
	23.5	-0.148844	-65.1842		23.5	-0.0547196	-108.741		23.5	0.0322638	-129.124			8.22397	0.147012	-2.702		4.94217	0.140964	-9.055	0.252851			169.2	2.596				169.2	10.247
	24	-0.0449827	-68.8842		24	-0.0527723	-105.82		24	0.0147373	-120.36			8.39895	0.143835	-2.949		5.04732	0.144345	-10.074	-0.00300432			172.8	2.731				172.8	11.483
	24.5	0.013439	-69.1439		24.5	-0.0501757	-107.118		24.5	0.00175466	-130.552			8.57393	0.139244	-2.309		5.15247	0.144345	-10.074	-0.00300432			176.4	2.919				176.4	11.483
	25	0.00435118	-69.079		25	-0.0410879	-106.014		25	-0.00863142	-126.138			8.74891	0.133938	-1.905		5.25762	0.144674	-11.197	-0.070513			180	3.265				180	12.053
	25.5	0.0101934	-75.6352		25.5	0.00629857	-103.353		25.5	-0.0287544	-124.125			8.92388	0.133938	-1.905		5.36278	0.144674	-11.197	-0.070513			183.6	3.265				183.6	12.053
	26	0.043299	-68.2351		26	0.0277199	-103.093		26	-0.0638075	-121.269			9.09886	0.130109	-2.848		5.46793	0.144353	-11.033	-0.0735161			187.2	2.774				187.2	12.02
	26.5	0.0828959	-71.0264		26.5	-0.0151227	-107.313		26.5	-0.102106	-124.255			9.27384	0.126318	-2.716		5.57308	0.143628	-11.934	-0.20561			190.8	2.632				190.8	12.858
	27	0.108212	-79.9844		27	-0.0391405	-110.818		27	-0.130668	-122.373			9.44882	0.124354	-2.657		5.67823	0.143628	-11.934	-0.20561			194.4	2.378				194.4	12.858
	27.5	0.128984	-78.9458		27.5	-0.036544	-107.118		27.5	-0.146896	-120.944			9.6238	0.120673	-1.429		5.78339	0.141209	-11.969	-0.367502			198	1.833				198	12.787
	28	0.128984	-81.023		28	-0.0255088	-106.404		28	-0.15144	-117.569			9.79878	0.116777	-1.493		5.88854	0.140341	-12.198	-0.381962			201.6	1.766				201.6	13.01
	28.5	0.121195	-81.6072		28.5	-0.0183684	-113.674		28.5	-0.155984	-113.479			9.97375	0.11502	-1.687		5.99369	0.139548	-12.275	-0.37186			205.2	1.414				205.2	13.105
	29	0.114703	-78.9458		29	-0.0138245	-111.922		29	-0.15923	-124.515			10.1487	0.111695	-1.667		6.09884	0.136783	-12.965	-0.481864			208.8	1.847				208.8	13.905
	29.5	0.10951	-80.4388		29.5	-0.00863142	-112.246		29.5	-0.164423	-120.685			10.3237	0.107594	-1.473		6.204	0.135139	-13.261	-0.492686			212.4	1.358				212.4	14.121
	30	0.101721	-79.9195		30	-0.00668403	-114.194		30	-0.14365	-119.451			10.4987	0.10519	-1.014		6.30915	0.130612	-14.473	-0.553243			216	1.532				216	14.578
	30.5	0.0952294	-74.8562		30.5	0.00110553	-117.18		30.5	-0.113141	-121.204			10.6737	0.102698	-1.099		6.4143	0.129853	-14.597	-0.554744			219.6	1.481				219.6	14.499
	31	0.0887381	-74.4668		31	0.0069477	-117.634		31	-0.146247	-118.348			10.8486	0.0987353	-0.681		6.51945	0.126018	-14.87	-0.599724			223.2	1.794				223.2	14.614
	31.5	0.0828959	-75.5054		31.5	0.00305292	-120.944		31.5	-0.172861	-117.829			11.0236	0.096774	-1.161		6.62461	0.124753	-14.732	-0.601939			226.8	1.937				226.8	14.469
	32	0.0679659	-76.8036		32	-0.00863142	-117.115		32	-0.134563	-113.739			11.1986	0.0925146	-0.888		6.72976	0.119324	-14.445	-0.660524			230.4	1.568				230.4	14.717
	32.5	0.0491412	-77.3878		32.5	-0.0203158	-119.516		32.5	-0.0475792	-114.388			11.3736	0.0883809	-0.637		6.83491	0.115724	-14.193	-0.66426			234	1.625				234	14.505
	33	0.0322638	-72.0001		33	-0.0268071	-114.323		33	0.0413516	-114.064			11.5486	0.0863064	-0.275		6.94006	0.114561	-14.356	-0.677719			237.6	1.306				237.6	14.534
	33.5	0.0147373	-71.0913		33.5	-0.0320001	-114.064		33.5	0.110809	-116.011			11.7235	0.0817067	-0.411		7.04522	0.107673	-14.438	-0.739624			241.2	1.794				241.2	14.121
	34	-0.00278925	-73.2983		34	-0.0475792	-112.895		34	0.14716	-111.986			11.8985	0.0775252	-0.495		7.15037	0.106299	-14.309	-0.737622			244.8	1.387				244.8	14.02
	34.5	-0.016421	-75.765		34.5	-0.0644566	-117.829		34.5	0.154949	-116.076			12.0735	0.0749294	-0.485		7.25552	0.101283	-14.319	-0.743354			248.4	1.408				248.4	13.717
	35	-0.0332984	-72.3246		35	-0.0677023	-119.127		35	0.152353	-110.883			12.2485	0.0701076	-0.236		7.36067	0.0960901	-14.111	-0.78639			252	1.522				252	13.594
	35.5	-0.0488775	-71.4158		35.5	-0.0553688	-112.116		35.5	0.147809	-110.169			12.4234	0.0662424	-0.301		7.46583	0.0936706	-14.059	-0.784854			255.6	1.248				255.6	13.56
	36	-0.0709479	-67.6509		36	-0.0287544	-116.271		36	0.143265	-112.83			12.5984	0.0629308	-0.161		7.57098	0.0867157	-13.431	-0.793359			259.2	1.131				259.2	13.042
	36.5	-0.0982114	-70.1176		36.5	-0.000192727	-116.271		36.5	0.13937	-121.529			12.7734	0.057071	-0.339		7.67613	0.0823994	-13.312	-0.808947			262.8	0.491				262.8	12.954
	37	-0.113141	-70.0527		37	0.0199303	-116.465		37	0.130932	-116.595			12.9484	0.0535308	-0.197		7.78128	0.0775267	-13.139	-0.830854			266.4	0.355				266.4	12.702
	37.5	-0.115738	-71.286		37.5	0.0322638	-119.387		37.5	0.123142	-117.115			13.1234	0.0468891	-0.343		7.88644	0.072595	-12.54	-0.81585			270	0.656				270	12.174
	38	-0.115738	-67.2614		38	0.0705624	-115.557		38	0.114054	-118.218			13.2983	0.0423347	0		7.99159	0.0712798	-12.299	-0.823061			273.6	0.444				273.6	12.013
	38.5	-0.11379	-79.2703		38.5	0.0549833	-112.181		38.5	0.10237	-120.36			13.4733	0.0378172	-0.444		8.09674	0.0621414	-12.795	-0.860198			277.2	0.652				277.2	12.015
	39	-0.100808	-87.6441		39	-0.0151227	-119.127		39	0.0906855	-117.374			13.6483	0.0318896	-0.188		8.20189	0.0562065	-12.337	-0.916365			280.8	0.23				280.8	11.659
	39.5	-0.0845796	-89.6564		39.5	-0.0508249	-119.387		39.5	0.0757555	-119.516			13.8233	0.0243678	-0.333		8.30705	0.0505414	-12.167	-0.918151			284.4	0.416				284.4	11.352
	40	-0.0300527	-82.6458		40	-0.0410879	-115.751		40	0.0595272	-114.064			13.9983	0.018462	-0.06		8.4122	0.0441597	-12.213	-0.946638			288	0.612				288	11.274
	40.5	-0.0112279	-89.6564		40.5	-0.0209649	-122.048		40.5	0.0465446	-112.376			14.1732	0.0128633	-0.111		8.51735	0.0355271	-12.11	-0.929832			291.6	0.917				291.6	10.871
	41	-0.0436844	-84.9178		41	-0.00928055	-118.997		41	0.0387551	-114.648			14.3482	0.00579044	-0.149		8.6225	0.0308483	-11.867	-0.956201			295.2	0.68				295.2	10.76
	41.5	-0.041737	-84.9178		41.5	-0.00863142	-117.244		41.5	0.0348603	-115.167			14.5232	-0.00017408	-0.449		8.72766	0.0265742	-11.081	-0.950794			298.8	1.003				298.8	10.282
	42	0.0069477	-81.9318		42	-0.0190175	-119.257		42	0.0270707	-116.401			14.6982	-0.00828934	-0.918		8.83281	0.0224434	-10.504	-0.96956			302.4	0.516				302.4	9.93
	42.5	0.0660185	-84.2037		42.5	-0.0410879	-120.555		42.5	0.000456404	-119.387			14.8731	-0.0144372	-0.333		8.93796	0.0137686	-10.347	-0.96445			306	0.488				306	9.735
	43	0.104317	-82.0616		43	-0.0670531	-120.88		43	-0.0345966	-114.843			15.0481	-0.0203902	-0.407		9.04311	0.00435201	-10.235	-0.993006			309.6	0.276				309.6	9.138
	43.5	0.121195	-79.4651		43.5	-0.0995096	-112.96		43.5	-0.066404	-116.271			15.2231	-0.0276531	-0.221		9.14826	-0.00235847	-9.623	-0.982697			313.2	0.223				313.2	8.564
	44	0.12444	-83.7493		44	-0.139756	-120.815		44	-0.0858779	-116.985			15.3981	-0.0366597	-0.264		9.25342	-0.00397708	-9.673	-0.976191			316.8	0.539				316.8	8.493
	44.5	0.118598	-79.0107		44.5	-0.1813	-120.49		44.5	-0.0904218	-126.657			15.5731	-0.0462468	-0.552		9.35857	-0.00938088	-9.281	-0.974681			320.4	0.252				320.4	8.214
	45	0.103668	-79.6598		45	-0.213757	-117.504		45	-0.0969131	-127.825			15.748	-0.0510639	-0.44		9.46372	-0.0182917	-8.836	-0.960377			324	0				324	7.677
	45.5	0.0900363	-78.751		45.5	-0.223493	-119.062		45.5	-0.117036	-127.371			15.923	-0.0602018	-0.607		9.56887	-0.0331205	-8.726	-0.949721			327.6	0.073				327.6	6.947
	46	0.0809485	-76.1545		46	-0.202721	-111.013		46	-0.138457	-128.345			16.098	-0.0699946	-0.577		9.67403	-0.0366865	-8.398	-1			331.2	0.973				331.2	6.86
	46.5	0.0705624	-77.9721		46.5	-0.149493	-113.415		46.5	-0.142352	-126.332			16.273	-0.0712868	-0.483		9.77918	-0.0366865	-8.398	-1			334.8	0.887				334.8	6.86
	47	0.0556325	-73.0387		47	-0.0702988	-118.088		47	-0.12937	-125.813			16.4479	-0.0841014	-0.32		9.88433	-0.0366865	-8.398	-1			338.4	1.173				338.4	6.86
	47.5	0.0413516	-74.8562		47.5	0.0166847	-119.257		47.5	-0.109896	-126.073			16.6229	-0.0959726	-0.159		9.98948	-0.0478566	-8.74	-0.94358			342	1.483				342	6.613
	48	0.0257725	-67.3263		48	0.093282	-123.866		48	-0.0904218	-125.553			16.7979	-0.0959726	-0.159		10.0946	-0.0629889	-6.963	-0.812507			345.6	1.483				345.6	5.186
	48.5	0.0108425	-76.8036		48.5	0.17702	-128.215		48.5	-0.0612109	-127.825			16.9729	-0.110375	-0.135		10.1998	-0.0629889	-6.963	-0.812507			349.2	1.61				349.2	5.186
	49	-0.0060349	-77.3229		49	0.167283	-131.59		49	0.0069477	-125.943			17.1479	-0.128355	-1.179		10.3049	-0.0629889	-6.963	-0.812507			352.8	1.853				352.8	5.186
	49.5	-0.0248597	-76.544		49.5	0.112107	-142.171		49.5	0.0381059	-130.097			17.3228	-0.128355	-1.179		10.4101	-0.0629889	-6.963	-0.812507			356.4	1.853				356.4	5.186
	50	-0.0456318	-72.6492		50	0.083545	-136.329		50	0.0303164	-123.606			17.3228	-0.145064	-1.756		10.4101	-0.0720261	-3.228	-0.535072
	50.5	-0.0553688	-77.7124		50.5	0.0861416	-143.924		50.5	0.048492	-122.437			17.4978	-0.145064	-1.756		10.5152	-0.0720261	-3.228	-0.535072
	51	-0.0553688	-72.8439		51	0.093282	-144.962		51	0.0874398	-118.737			17.6728	-0.145064	-1.756		10.6204	-0.0720261	-3.228	-0.535072
	51.5	-0.0573162	-78.1019		51.5	0.0861416	-146.585		51.5	0.125089	-120.36			17.8478	-0.137956	-2.279		10.7256	-0.0720261	-3.228	-0.535072
	52	-0.0638075	-78.4914		52	0.0660185	-150.869		52	0.146511	-120.555			18.0227	-0.129026	-2.072		10.8307	-0.0724982	-3.294	-0.492308
	52.5	-0.0722462	-79.1405		52.5	0.0329129	-148.857		52.5	0.145862	-118.737			18.1977	-0.128112	-1.972		10.9359	-0.0659648	-1.828	-0.00103277
	53	-0.096264	-72.3895		53	-0.0060349	-148.597		53	0.135475	-118.348			18.3727	-0.109093	-2.529		11.041	-0.0626011	-1.145	0.105473
	53.5	-0.131317	-77.1931		53.5	-0.0410879	-149.506		53.5	0.123142	-116.271			18.5477	-0.088555	-2.425		11.1462	-0.0626011	-1.145	0.105473
	54	-0.17416	-71.8053		54	-0.0651057	-145.611		54	0.105615	-116.401			18.7227	-0.0855137	-2.323		11.2513	-0.0619773	-1.187	0.180221
	54.5	-0.205967	-76.8036		54.5	-0.071597	-139.445		54.5	0.083545	-114.972			18.8976	-0.0687934	-2.406		11.3565	-0.0583523	-1.185	0.233496
	55	-0.206616	-77.3878		55	-0.0741935	-145.352		55	0.0647203	-120.166			19.0726	-0.0486684	-2.744		11.4616	-0.0414327	-0.834	0.711916
	55.5	-0.162475	-75.5703		55.5	-0.0735444	-140.808		55.5	0.0549833	-115.622			19.2476	-0.0435357	-2.697		11.5668	-0.0367202	-0.6	0.812239
	56	-0.0579653	-78.8159		56	-0.0631583	-135.29		56	0.0497903	-116.336			19.4226	-0.0311463	-2.855		11.6719	-0.0316199	-0.395	0.847068
	56.5	-0.00278925	-84.3984		56.5	-0.0378423	-133.992		56.5	0.0445972	-119.516			19.5976	-0.0157603	-2.933		11.7771	-0.0307347	0	0.834378
	57	-0.00408751	-84.2686		57	-0.00408751	-139.055		57	0.0342112	-125.294			19.7725	-0.00718794	-2.858		11.8822	-0.0260728	-0.209	0.859208
	57.5	0.00954422	-81.2826		57.5	0.0322638	-150.934		57.5	0.0296673	-121.918			19.9475	0.0038456	-2.306		11.9874	-0.0148184	-0.579	0.794605
	58	0.0465446	-72.1948		58	0.0627729	-146.65		58	0.0205794	-116.401			20.1225	0.0162266	-2.822		12.0925	-0.00963379	-0.864	0.791395
	58.5	0.0900363	-74.9211		58.5	0.0887381	-150.74		58.5	0.00500031	-123.541			20.2975	0.0289545	-3.345		12.1977	-0.00671692	-1.336	0.762658
	59	0.123142	-76.6089		59	0.0997733	-151.454		59	-0.0151227	-122.373			20.4724	0.04416	-3.664		12.3028	-0.00421313	-1.302	0.743577
	59.5	0.135475	-76.9984		59.5	0.103019	-157.101		59.5	-0.0391405	-121.334			20.6474	0.0602934	-3.951		12.408	-0.00278842	-1.359	0.67829
	60	0.135475	-70.7018		60	0.100422	-152.492		60	-0.0683514	-121.853			20.8224	0.0804246	-3.239		12.5131	0.00717615	-1.389	0.768206
	60.5	0.126388	-66.3526		60.5	0.0978259	-152.362		60.5	-0.0943166	-118.283			20.9974	0.0882608	-2.948		12.6183	0.0095029	-1.296	0.816603
	61	0.10951	-72.9089		61	0.093282	-150.804		61	-0.111843	-120.555			21.1724	0.104653	-3.155		12.7234	0.0155727	-1.21	0.793549
	61.5	0.093282	-76.4791		61.5	0.0854924	-143.534		61.5	-0.120931	-120.944			21.3473	0.122782	-3.012		12.8286	0.0203695	-1.057	0.839377
	62	0.0887381	-79.4002		62	0.073159	-144.248		62	-0.126773	-121.074			21.5223	0.1328	-3.313		12.9338	0.0283108	-0.99	0.779785
	62.5	0.0887381	-80.7633		62.5	0.0621238	-145.936		62.5	-0.144949	-120.166			21.6973	0.149236	-3.412		13.0389	0.0342036	-0.701	0.788752
	63	0.0893872	-79.5949		63	0.0381059	-141.068		63	-0.12937	-119.646			21.8723	0.155427	-3.156		13.1441	0.0342036	-0.701	0.788752
	63.5	0.0796503	-79.0756		63.5	0.00564944	-137.173		63.5	-0.125475	-123.346			22.0472	0.160836	-2.665		13.2492	0.0411838	-0.972	0.859685
	64	0.0666677	-80.0493		64	-0.0320001	-135.485		64	-0.17416	-116.271			22.2222	0.168577	-2.552		13.3544	0.0509123	-1.418	0.895825
	64.5	0.0608255	-84.4634		64.5	-0.0631583	-135.55		64.5	-0.198827	-118.997			22.3972	0.170228	-2.57		13.4595	0.0557935	-1.531	0.89859
	65	0.0536851	-81.737		65	-0.0878253	-130.876		65	-0.172212	-118.867			22.5722	0.173102	-2.772		13.5647	0.0633976	-2.363	0.956388
	65.5	0.048492	-84.2686		65.5	-0.104054	-131.655		65.5	-0.109247	-114.778			22.7472	0.175326	-2.958		13.6698	0.0664662	-2.467	0.949869
	66	0.0387551	-81.8019		66	-0.109896	-127.631		66	-0.0229123	-113.739			22.9221	0.174721	-3.106		13.775	0.0796848	-3.078	1
	66.5	0.0244742	-82.0616		66.5	-0.0943166	-116.92		66.5	0.083545	-121.269			23.0971	0.175536	-3.25		13.8801	0.0796848	-3.078	1
	67	0.00305292	-80.3089		67	-0.0690005	-121.594		67	0.118598	-116.401			23.2721	0.174733	-3.13		13.9853	0.0898349	-2.996	0.982317
	67.5	-0.031351	-85.1774		67.5	-0.0229123	-123.022		67.5	0.0913346	-118.023			23.4471	0.173958	-3.185		14.0904	0.0975738	-3.053	0.915346
	68	-0.0657549	-82.7756		68	0.0173338	-124.19		68	0.0802994	-119.841			23.622	0.173237	-2.93		14.1956	0.100609	-3.279	0.918428
	68.5	-0.0878253	-81.9318		68.5	-0.00798229	-125.813		68.5	0.0971768	-123.216			23.797	0.171279	-3.169		14.3007	0.109073	-4.697	0.799342
	69	-0.0995096	-77.9721		69	-0.0345966	-126.916		69	0.121195	-119.841			23.972	0.17054	-2.977		14.4059	0.109933	-4.656	0.787042
	69.5	-0.113141	-81.2826		69.5	-0.0300527	-126.981		69.5	0.135475	-121.269			24.147	0.16699	-2.803		14.511	0.118515	-5.963	0.78739
	70	-0.147545	-76.544		70	-0.000841855	-122.632		70	0.135475	-113.479			24.322	0.165664	-3.682		14.6162	0.125672	-6.329	0.717355
	70.5	-0.196879	-83.8791		70.5	0.0368077	-127.306		70.5	0.123791	-113.739			24.4969	0.164761	-3.593		14.7213	0.127982	-6.289	0.609481
	71	-0.228037	-85.7616		71	0.0692642	-128.734		71	0.114703	-114.583			24.6719	0.160779	-3.591		14.8265	0.129364	-6.472	0.578529
	71.5	-0.221546	-86.995		71.5	0.0822468	-129.773		71.5	0.105615	-113.025			24.8469	0.157946	-3.031		14.9317	0.136665	-7.41	0.419956
	72	-0.187791	-83.23		72	0.0802994	-125.943		72	0.0978259	-113.35			25.0219	0.156506	-3.144		15.0368	0.137407	-7.809	0.38854
	72.5	-0.130019	-84.723		72.5	0.0712116	-131.915		72.5	0.0893872	-114.908			25.1969	0.153319	-2.748		15.142	0.141074	-8.288	0.273116
	73	-0.0605618	-77.5177		73	0.0549833	-131.201		73	0.0770538	-113.544			25.3718	0.148878	-2.916		15.2471	0.140964	-9.055	0.252851
	73.5	0.00564944	-87.3195		73.5	0.0361586	-134.576		73.5	0.0673168	-116.92			25.5468	0.147012	-2.702		15.3523	0.140964	-9.055	0.252851
	74	0.0945803	-85.9564		74	0.0121407	-126.916		74	0.0549833	-117.05			25.7218	0.143835	-2.949		15.4574	0.144345	-10.074	-0.00300432
	74.5	0.104317	-93.2266		74.5	-0.00863142	-129.188		74.5	0.0394042	-118.218			25.8968	0.139244	-2.309		15.5626	0.144345	-10.074	-0.00300432
	75	0.0751063	-95.5635		75	-0.0345966	-131.46		75	0.023176	-116.141			26.0717	0.133938	-1.905		15.6677	0.144674	-11.197	-0.070513
	75.5	0.0705624	-91.0196		75.5	-0.0605618	-127.695		75.5	0.00954422	-114.453			26.2467	0.133938	-1.905		15.7729	0.144674	-11.197	-0.070513
	76	0.0991242	-98.0302		76	-0.0787375	-128.15		76	-0.00149099	-118.348			26.4217	0.130109	-2.848		15.878	0.144353	-11.033	-0.0735161
	76.5	0.12444	-98.2898		76.5	-0.0852288	-129.578		76.5	-0.0125262	-115.751			26.5967	0.126318	-2.716		15.9832	0.143628	-11.934	-0.20561
	77	0.129633	-99.0039		77	-0.0826322	-122.632		77	-0.0307018	-116.725			26.7717	0.124354	-2.657		16.0883	0.143628	-11.934	-0.20561
	77.5	0.117949	-92.9021		77.5	-0.0709479	-125.488		77.5	-0.0547196	-113.804			26.9466	0.120673	-1.429		16.1935	0.141209	-11.969	-0.367502
	78	0.103019	-92.0582		78	-0.0560179	-118.283		78	-0.0852288	-112.96			27.1216	0.116777	-1.493		16.2986	0.140341	-12.198	-0.381962
	78.5	0.0874398	-90.9547		78.5	0.00500031	-116.141		78.5	-0.117685	-114.778			27.2966	0.11502	-1.687		16.4038	0.139548	-12.275	-0.37186
	79	0.0770538	-91.7336		79	0.0264216	-116.206		79	-0.146896	-117.309			27.4716	0.111695	-1.667		16.5089	0.136783	-12.965	-0.481864
	79.5	0.0679659	-92.5126		79.5	0.00175466	-121.139		79.5	-0.167019	-114.843			27.6465	0.107594	-1.473		16.6141	0.135139	-13.261	-0.492686
	80	0.0536851	-88.6178		80	-0.00149099	-122.113		80	-0.177405	-112.701			27.8215	0.10519	-1.014		16.7192	0.130612	-14.473	-0.553243
	80.5	0.0329129	-92.6424		80.5	0.0218777	-119.257		80.5	-0.172861	-118.608			27.9965	0.102698	-1.099		16.8244	0.129853	-14.597	-0.554744
	81	0.00889509	-91.2792		81	0.0549833	-125.683		81	-0.145598	-117.439			28.1715	0.0987353	-0.681		16.9295	0.126018	-14.87	-0.599724
	81.5	-0.00863142	-91.1494		81.5	0.0757555	-125.683		81.5	-0.0761409	-121.399			28.3465	0.096774	-1.161		17.0347	0.124753	-14.732	-0.601939
	82	-0.0125262	-88.488		82	0.0718607	-118.478		82	-0.0475792	-114.713			28.5214	0.0925146	-0.888		17.1399	0.119324	-14.445	-0.660524
	82.5	-0.0229123	-82.9054		82.5	0.0549833	-125.878		82.5	-0.0579653	-115.037			28.6964	0.0883809	-0.637		17.245	0.115724	-14.193	-0.66426
	83	-0.0391405	-84.9827		83	0.0387551	-128.929		83	-0.0397897	-119.127			28.8714	0.0863064	-0.275		17.3502	0.114561	-14.356	-0.677719
	83.5	-0.0625092	-81.737		83.5	0.0212286	-126.657		83.5	0.00370205	-117.504			29.0464	0.0817067	-0.411		17.4553	0.107673	-14.438	-0.739624
	84	-0.0897727	-84.2686		84	0.00889509	-127.176		84	0.0595272	-118.348			29.2213	0.0775252	-0.495		17.5605	0.106299	-14.309	-0.737622
	84.5	-0.128071	-80.1791		84.5	-0.000841855	-124.709		84.5	0.101721	-118.867			29.3963	0.0749294	-0.485		17.6656	0.101283	-14.319	-0.743354
	85	-0.176107	-77.258		85	-0.0222631	-124.839		85	0.125738	-113.999			29.5713	0.0701076	-0.236		17.7708	0.0960901	-14.111	-0.78639
	85.5	-0.215055	-83.8142		85.5	-0.041737	-124.709		85.5	0.131581	-119.451			29.7463	0.0662424	-0.301		17.8759	0.0936706	-14.059	-0.784854
	86	-0.239722	-81.9967		86	-0.0553688	-116.79		86	0.131581	-123.541			29.9213	0.0629308	-0.161		17.9811	0.0867157	-13.431	-0.793359
	86.5	-0.252704	-88.7476		86.5	-0.0592636	-119.062		86.5	0.121195	-124.19			30.0962	0.057071	-0.339		18.0862	0.0823994	-13.312	-0.808947
	87	-0.234529	-94.2003		87	-0.0560179	-114.064		87	0.107563	-123.606			30.2712	0.0535308	-0.197		18.1914	0.0775267	-13.139	-0.830854
	87.5	-0.191686	-85.8265		87.5	-0.0495266	-114.129		87.5	0.0958785	-122.567			30.4462	0.0468891	-0.343		18.2965	0.072595	-12.54	-0.81585
	88	-0.122878	-87.5792		88	-0.0352457	-110.039		88	0.0861416	-118.867			30.6212	0.0423347	0		18.4017	0.0712798	-12.299	-0.823061
	88.5	-0.0157718	-85.7616		88.5	-0.021614	-115.102		88.5	0.0815977	-119.906			30.7962	0.0378172	-0.444		18.5068	0.0621414	-12.795	-0.860198
	89	0.0316146	-85.8265		89	-0.0118771	-117.115		89	0.0757555	-121.074			30.9711	0.0318896	-0.188		18.612	0.0562065	-12.337	-0.916365
	89.5	0.0316146	-85.7616		89.5	0.00370205	-112.636		89.5	0.0699133	-123.671			31.1461	0.0243678	-0.333		18.7171	0.0505414	-12.167	-0.918151
	90	0.0471938	-87.1897		90	0.0270707	-110.623		90	0.0660185	-119.646			31.3211	0.018462	-0.06		18.8223	0.0441597	-12.213	-0.946638
	90.5	0.0867907	-96.0828		90.5	0.0653694	-118.608		90.5	0.0614746	-122.762			31.4961	0.0128633	-0.111		18.9274	0.0355271	-12.11	-0.929832
	91	0.127037	-88.9424		91	0.0815977	-115.492		91	0.0562816	-120.036			31.671	0.00579044	-0.149		19.0326	0.0308483	-11.867	-0.956201
	91.5	0.148458	-87.7739		91.5	0.0361586	-114.258		91.5	0.0504394	-123.541			31.846	-0.00017408	-0.449		19.1377	0.0265742	-11.081	-0.950794
	92	0.153651	-94.7196		92	0.00500031	-120.36		92	0.0374568	-131.525			32.021	-0.00828934	-0.918		19.2429	0.0224434	-10.504	-0.96956
	92.5	0.153651	-92.0582		92.5	0.00435118	-113.999		92.5	0.0218777	-129.578			32.196	-0.0144372	-0.333		19.3481	0.0137686	-10.347	-0.96445
	93	0.145212	-93.2266		93	0.0160355	-121.983		93	0.00370205	-133.148			32.371	-0.0203902	-0.407		19.4532	0.00435201	-10.235	-0.993006
	93.5	0.130932	-89.3318		93.5	0.0218777	-122.373		93.5	-0.0235614	-133.732			32.5459	-0.0276531	-0.221		19.5584	-0.00235847	-9.623	-0.982697
	94	0.112107	-86.6055		94	0.0251233	-124.969		94	-0.0612109	-132.11			32.7209	-0.0366597	-0.264		19.6635	-0.00397708	-9.673	-0.976191
	94.5	0.0971768	-83.3598		94.5	0.0212286	-130.487		94.5	-0.0988605	-135.29			32.8959	-0.0462468	-0.552		19.7687	-0.00938088	-9.281	-0.974681
	95	0.088089	-75.1159		95	0.00564944	-126.981		95	-0.124177	-133.992			33.0709	-0.0510639	-0.44		19.8738	-0.0182917	-8.836	-0.960377
	95.5	0.0815977	-82.1265		95.5	-0.0203158	-127.695		95.5	-0.14365	-128.734			33.2458	-0.0602018	-0.607		19.979	-0.0331205	-8.726	-0.949721
	96	0.0660185	-77.7124		96	-0.0586144	-120.49		96	-0.155984	-128.669			33.4208	-0.0699946	-0.577		20.0841	-0.0366865	-8.398	-1
	96.5	0.0504394	-75.1159		96.5	-0.106001	-121.983		96.5	-0.155335	-135.225			33.5958	-0.0712868	-0.483		20.1893	-0.0366865	-8.398	-1
	97	0.0413516	-76.2843		97	-0.146896	-114.583		97	-0.152738	-133.278			33.7708	-0.0841014	-0.32		20.2944	-0.0366865	-8.398	-1
	97.5	0.033562	-75.5054		97.5	-0.162475	-115.427		97.5	-0.122878	-139.25			33.9458	-0.0959726	-0.159		20.3996	-0.0478566	-8.74	-0.94358
	98	0.028369	-71.6106		98	-0.146896	-114.843		98	-0.0735444	-142.755			34.1207	-0.0959726	-0.159		20.5047	-0.0629889	-6.963	-0.812507
	98.5	0.0205794	-77.9721		98.5	-0.110545	-113.869		98.5	-0.081334	-143.859			34.2957	-0.110375	-0.135		20.6099	-0.0629889	-6.963	-0.812507
	99	0.0127899	-76.2843		99	-0.0709479	-111.013		99	-0.0787375	-149.247			34.4707	-0.128355	-1.179		20.715	-0.0629889	-6.963	-0.812507
	99.5	0.00175466	-71.9352		99.5	-0.00343838	-111.662		99.5	-0.0391405	-148.208			34.6457	-0.128355	-1.179		20.8202	-0.0629889	-6.963	-0.812507
	100	0.00110553	-73.2983		100	0.00564944	-114.843		100	0.0147373	-149.701
	100.5	-0.00278925	-69.079		100.5	-0.0268071	-124.19		100.5	0.0640711	-150.999
	101	-0.0151227	-72.5843		101	-0.0358949	-121.139		101	0.0854924	-148.727
	101.5	-0.0332984	-71.7404		101.5	-0.0151227	-121.723		101.5	0.093282	-152.752
	102	-0.051474	-69.5983		102	0.0153864	-122.957		102	0.0971768	-150.09
	102.5	-0.0787375	-68.7544		102.5	0.0290181	-119.906		102.5	0.104317	-149.961
	103	-0.111843	-73.7527		103	0.0342112	-120.101		103	0.119247	-143.599
	103.5	-0.155984	-73.0387		103.5	0.0394042	-123.866		103.5	0.167283	-147.559
	104	-0.204669	-68.4948		104	0.0381059	-125.294		104	0.145212	-145.806
	104.5	-0.237125	-70.4421		104.5	0.0277199	-121.204		104.5	0.0790011	-148.273
	105	-0.213107	-71.8702		105	0.0108425	-122.373		105	0.0394042	-145.611
	105.5	-0.207265	-77.3229		105.5	-0.0144736	-125.553		105.5	0.0368077	-143.145
	106	-0.185195	-77.8422		106	-0.0352457	-126.397		106	0.0452464	-138.666
	106.5	-0.112492	-82.3212		106.5	-0.0560179	-127.825		106.5	0.0517377	-142.171
	107	-0.00928055	-79.0756		107	-0.0683514	-131.331		107	0.0439481	-138.601
	107.5	0.0757555	-74.8562		107.5	-0.0677023	-125.618		107.5	0.0277199	-137.367
	108	0.127686	-77.0633		108	-0.0547196	-132.11		108	0.0121407	-135.874
	108.5	0.147809	-79.2054		108.5	-0.0307018	-132.045		108.5	-0.00343838	-135.939
	109	0.149107	-75.5703		109	-0.00473664	-131.785		109	-0.016421	-131.915
	109.5	0.136774	-73.2334		109.5	0.0127899	-130.746		109.5	-0.0320001	-130.097
	110	0.123142	-73.1036		110	0.0270707	-132.174		110	-0.0488775	-133.408
	110.5	0.106265	-71.1562		110.5	0.0407025	-129.902		110.5	-0.0644566	-132.629
	111	0.0978259	-72.779		111	0.0517377	-132.564		111	-0.0806849	-137.432
	111.5	0.0958785	-76.0896		111.5	0.0575798	-131.266		111.5	-0.100808	-143.015
	112	0.0900363	-67.7807		112	0.0575798	-128.085		112	-0.120931	-142.95
	112.5	0.0790011	-74.9861		112.5	0.0523868	-141.068		112.5	-0.145598	-140.159
	113	0.0725098	-77.1282		113	0.0491412	-140.289		113	-0.174809	-139.315
	113.5	0.063422	-76.8036		113.5	0.043299	-141.976		113.5	-0.194283	-136.199
	114	0.0504394	-71.6106		114	0.0348603	-138.796		114	-0.19623	-134.706
	114.5	0.0381059	-69.8579		114.5	0.023176	-136.199		114.5	-0.175458	-133.213
	115	0.0270707	-68.1053		115	0.0069477	-132.759		115	-0.127422	-129.902
	115.5	0.00759683	-73.2983		115.5	-0.0190175	-130.227		115.5	-0.0754918	-123.995
	116	-0.0203158	-70.9614		116	-0.0436844	-131.201		116	-0.0183684	-123.216
	116.5	-0.0625092	-74.272		116.5	-0.0677023	-123.411		116.5	0.0270707	-124.125
	117	-0.109896	-68.3649		117	-0.0819831	-126.008		117	0.0614746	-128.994
	117.5	-0.150791	-71.1562		117.5	-0.0936675	-120.75		117.5	0.0939311	-124.45
	118	-0.177405	-70.6369		118	-0.0852288	-121.464		118	0.123142	-119.776
	118.5	-0.180002	-71.2211		118.5	-0.0644566	-118.023		118.5	0.145862	-127.825
	119	-0.127422	-72.8439		119	-0.0391405	-114.908		119	0.1543	-122.048
	119.5	-0.133914	-68.9491		119.5	-0.0157718	-124.839		119.5	0.142616	-118.997
	120	-0.168317	-65.8982		120	0.00240379	-122.048		120	0.123142	-117.699
	120.5	-0.147545	-71.286		120.5	0.0153864	-123.736		120.5	0.101721	-118.997
	121	-0.0774392	-74.1422		121	0.0290181	-123.541		121	0.0815977	-122.827
	121.5	-0.000192727	-71.6106		121.5	0.0407025	-120.036		121.5	0.0692642	-122.308
	122	0.0601764	-70.3772		122	0.0536851	-120.62		122	0.0621238	-124.19
	122.5	0.101072	-69.5334		122.5	0.0608255	-127.241		122.5	0.0523868	-121.139
	123	0.127686	-75.4405		123	0.0562816	-126.592		123	0.0420007	-119.516
	123.5	0.13223	-76.4141		123.5	0.0478429	-127.046		123.5	0.0322638	-115.362
	124	0.135475	-76.2194		124	0.0361586	-126.787		124	0.0251233	-124.19
	124.5	0.134826	-76.0247		124.5	0.018632	-128.799		124.5	0.0238251	-123.736
	125	0.134177	-75.3106		125	-0.000841855	-128.799		125	0.0166847	-123.087
	125.5	0.128984	-74.5966		125.5	-0.0268071	-124.645		125.5	0.00305292	-122.502
	126	0.125738	-75.5054		126	-0.0560179	-118.478		126	-0.0151227	-115.427
	126.5	0.119896	-75.5054		126.5	-0.0845796	-122.308		126.5	-0.0404388	-119.711
	127	0.116651	-73.6878		127	-0.112492	-117.764		127	-0.0683514	-121.399
	127.5	0.101721	-72.1948		127.5	-0.130668	-113.609		127.5	-0.0819831	-117.958
	128	0.083545	-73.2334		128	-0.131317	-110.623		128	-0.0657549	-115.427
	128.5	0.073159	-76.8036		128.5	-0.0891235	-111.597		128.5	-0.112492	-123.866
	129	0.0673168	-73.2983		129	-0.0852288	-109.715		129	-0.168317	-124.125
	129.5	0.063422	-68.2351		129.5	-0.0956148	-109		129.5	-0.176756	-122.632
	130	0.0549833	-66.6123		130	-0.0709479	-102.899		130	-0.135212	-117.634
	130.5	0.0374568	-69.6632		130.5	-0.0118771	-103.613		130.5	-0.0741935	-119.906
	131	0.0173338	-73.1036		131	0.0517377	-105.69		131	-0.0242105	-127.695
	131.5	-0.000841855	-74.7264		131.5	0.0945803	-112.246		131.5	0.00759683	-127.631
	132	-0.021614	-71.286		132	0.116002	-115.881		132	0.0575798	-126.916
	132.5	-0.0501757	-72.7141		132.5	0.119247	-124.515		132.5	0.0751063	-130.032
	133	-0.086527	-74.2071		133	0.111458	-125.618		133	0.0400533	-126.981
	133.5	-0.126773	-76.0247		133.5	0.0913346	-123.476		133.5	0.0251233	-127.046
	134	-0.168967	-69.5334		134	0.0712116	-124.32		134	0.0491412	-131.331
	134.5	-0.207914	-73.4282		134.5	0.0465446	-131.006		134.5	0.0822468	-136.459
	135	-0.240371	-73.7527		135	0.0192812	-122.762		135	0.10951	-136.199
	135.5	-0.227388	-76.3492		135.5	-0.0118771	-121.009		135.5	0.118598	-133.732
	136	-0.220897	-67.3912		136	-0.0430353	-119.192		136	0.113405	-137.627
	136.5	-0.232581	-77.5177		136.5	-0.0839305	-119.322		136.5	0.108212	-138.99
	137	-0.187791	-74.5966		137	-0.120282	-114.129		137	0.101072	-135.29
	137.5	-0.102755	-75.1808		137.5	-0.154686	-118.283		137.5	0.0945803	-136.459
	138	-0.0105788	-72.779		138	-0.185195	-113.804		138	0.0874398	-131.915
	138.5	0.0660185	-78.1019		138.5	-0.195581	-113.155		138.5	0.0802994	-134.381
	139	0.10951	-71.0913		139	-0.180651	-110.493		139	0.0705624	-130.746
	139.5	0.127037	-75.4405		139.5	-0.144949	-106.209		139.5	0.063422	-130.227
	140	0.138721	-68.4948		140	-0.0891235	-109.65		140	0.0549833	-126.527
	140.5	0.141318	-77.1931		140.5	-0.041737	-118.867		140.5	0.0471938	-124.32
	141	0.130932	-79.7247		141	-0.0105788	-121.009		141	0.0394042	-125.683
	141.5	0.1173	-79.4651		141.5	0.00824596	-128.409		141.5	0.0270707	-128.474
	142	0.107563	-76.9984		142	0.0296673	-126.202		142	0.0166847	-121.269
	142.5	0.0939311	-80.6984		142.5	0.0497903	-133.732		142.5	0.00500031	-128.15
	143	0.0815977	-83.23		143	0.0653694	-134.446		143	-0.0138245	-126.138
	143.5	0.0725098	-80.0493		143.5	0.0744572	-140.938		143.5	-0.036544	-128.994
	144	0.0627729	-92.6424		144	0.0777029	-134.901		144	-0.0728953	-130.487
	144.5	0.0523868	-97.8355		144.5	0.073159	-139.899		144.5	-0.115089	-130.876
	145	0.043299	-99.1986		145	0.0569307	-144.638		145	-0.147545	-130.876
	145.5	0.0316146	-103.288		145.5	0.0329129	-141.717		145.5	-0.177405	-127.695
	146	0.0290181	-95.8231		146	0.00500031	-139.25		146	-0.190388	-132.434
	146.5	0.0309655	-95.8881		146.5	-0.0196666	-135.939		146.5	-0.177405	-132.174
	147	0.0309655	-97.0565		147	-0.0371931	-139.055		147	-0.122229	-130.292
	147.5	0.0101934	-90.9547		147.5	-0.0560179	-133.927		147.5	-0.130019	-128.539
	148	-0.0177192	-88.0985		148	-0.081334	-129.318		148	-0.177405	-133.148
	148.5	-0.0501757	-90.4354		148.5	-0.111194	-128.669		148.5	-0.192984	-133.408
	149	-0.081334	-91.474		149	-0.130668	-121.983		149	-0.155984	-131.395
	149.5	-0.122878	-93.2915		149.5	-0.118984	-118.997		149.5	-0.0845796	-138.536
	150	-0.168317	-86.4108		150	-0.0625092	-124.709		150	0.000456404	-133.148
	150.5	-0.220248	-79.9195		150.5	-0.00992968	-119.711		150.5	0.0790011	-133.018
	151	-0.257248	-83.6195		151	-0.0170701	-121.853		151	0.127037	-128.02
	151.5	-0.257897	-80.7633		151.5	-0.016421	-118.283		151.5	0.14716	-127.436
	152	-0.221546	-86.8002		152	0.0205794	-116.985		152	0.153651	-128.734
	152.5	-0.152089	-90.2406		152.5	0.0751063	-121.918		152.5	0.148458	-127.111
	153	-0.0728953	-88.6178		153	0.114703	-120.166		153	0.135475	-122.762
	153.5	0.00564944	-96.7968		153.5	0.136125	-120.88		153.5	0.130282	-131.071
	154	0.0699133	-88.488		154	0.145862	-119.127		154	0.129633	-120.944
	154.5	0.10951	-94.0705		154.5	0.143265	-128.604		154.5	0.133528	-127.566
	155	0.130282	-91.3442		155	0.13937	-129.448		155	0.131581	-123.671
	155.5	0.138721	-88.6178		155.5	0.130282	-131.46		155.5	0.119247	-122.178
	156	0.143265	-87.1897		156	0.118598	-134.511		156	0.106914	-120.555
	156.5	0.145212	-85.3072		156.5	0.104966	-132.11		156.5	0.0945803	-123.541
	157	0.145212	-83.8791		157	0.0887381	-131.46		157	0.0751063	-119.646
	157.5	0.133528	-79.9195		157.5	0.0679659	-133.083		157.5	0.0575798	-118.478
	158	0.118598	-71.6106		158	0.0387551	-128.734		158	0.0445972	-117.439
	158.5	0.0978259	-78.1019		158.5	0.0114916	-129.383		158.5	0.033562	-122.892
	159	0.0770538	-81.4774		159	-0.0125262	-127.955		159	0.0251233	-118.478
	159.5	0.0647203	-77.5177		159.5	-0.0495266	-123.541		159.5	0.0101934	-116.66
	160	0.0608255	-73.9475		160	-0.0871762	-123.671		160	-0.00343838	-117.309
	160.5	0.0556325	-69.0141		160.5	-0.104703	-124.32		160.5	-0.00863142	-116.401
	161	0.0530359	-79.0756		161	-0.0936675	-117.829		161	-0.0248597	-121.399
	161.5	0.0452464	-73.4282		161.5	-0.0683514	-117.894		161.5	-0.051474	-124.19
	162	0.0420007	-76.0896		162	-0.0501757	-115.362		162	-0.0767901	-118.543
	162.5	0.0420007	-76.8036		162.5	-0.041737	-123.411		162.5	-0.0988605	-119.257
	163	0.0322638	-81.023		163	-0.031351	-121.074		163	-0.107299	-121.983
	163.5	0.0166847	-74.1422		163.5	-0.0157718	-121.918		163.5	-0.071597	-124.19
	164	-0.000192727	-73.2334		164	0.00175466	-120.815		164	-0.0722462	-121.788
	164.5	-0.0222631	-70.7667		164.5	0.0238251	-119.841		164.5	-0.130019	-122.373
	165	-0.0410879	-68.7544		165	0.0400533	-119.516		165	-0.163124	-122.697
	165.5	-0.0586144	-80.6984		165.5	0.0517377	-119.127		165.5	-0.133914	-115.297
	166	-0.0696496	-75.1159		166	0.0588781	-122.957		166	-0.0618601	-124.19
	166.5	-0.0832814	-75.8299		166.5	0.0614746	-126.852		166.5	0.0140881	-122.178
	167	-0.102755	-72.0001		167	0.0530359	-127.566		167	0.073159	-123.995
	167.5	-0.138457	-74.8562		167.5	0.0478429	-124.515		167.5	0.108212	-122.178
	168	-0.17351	-71.6755		168	0.0374568	-119.776		168	0.118598	-122.373
	168.5	-0.195581	-78.037		168.5	0.0205794	-127.176		168.5	0.114703	-123.087
	169	-0.193633	-78.2317		169	-0.00863142	-126.202		169	0.108212	-126.722
	169.5	-0.163124	-75.765		169.5	-0.051474	-128.215		169.5	0.0952294	-120.166
	170	-0.0936675	-69.1439		170	-0.0891235	-125.813		170	0.0815977	-126.527
	170.5	-0.0410879	-73.3632		170.5	-0.116387	-125.488		170.5	0.0757555	-124.45
	171	-0.051474	-74.272		171	-0.133264	-121.659		171	0.0764046	-123.606
	171.5	-0.0378423	-70.7667		171.5	-0.107948	-123.995		171.5	0.0809485	-121.594
	172	0.0101934	-74.0124		172	-0.102106	-128.669		172	0.0822468	-117.115
	172.5	0.0653694	-74.7264		172.5	-0.132615	-130.032		172.5	0.0712116	-118.867
	173	0.100422	-72.9089		173	-0.130019	-129.513		173	0.0562816	-123.671
	173.5	0.110159	-72.7141		173.5	-0.0748427	-126.722		173.5	0.0420007	-125.553
	174	0.104966	-69.4685		174	0.00370205	-132.824		174	0.0290181	-120.815
	174.5	0.101072	-72.9089		174.5	0.0725098	-134.511		174.5	0.0251233	-120.49
	175	0.0965276	-73.6878		175	0.116002	-135.745		175	0.0192812	-117.894
	175.5	0.0945803	-68.9491		175.5	0.136774	-142.236		175.5	0.00824596	-122.957
	176	0.0900363	-72.5194		176	0.134826	-137.108		176	-0.0144736	-118.218
	176.5	0.0822468	-70.8316		176.5	0.123791	-145.417		176.5	-0.0475792	-118.932
	177	0.0725098	-75.1808		177	0.104966	-143.339		177	-0.0832814	-117.504
	177.5	0.0621238	-70.9614		177.5	0.0867907	-143.339		177.5	-0.123527	-123.281
	178	0.0497903	-74.5966		178	0.0770538	-140.029		178	-0.172212	-122.113
	178.5	0.0348603	-72.6492		178.5	0.0640711	-138.601		178.5	-0.18844	-122.827
	179	0.00889509	-72.779		179	0.0387551	-135.745		179	-0.168317	-123.671
	179.5	-0.0125262	-73.2334		179.5	0.00954422	-136.069		179.5	-0.135212	-121.529
	180	-0.0157718	-67.1965		180	-0.0281053	-135.29		180	-0.0722462	-126.267
	180.5	-0.0151227	-65.7035		180.5	-0.0638075	-133.927		180.5	-0.0605618	-127.046
	181	-0.0196666	-69.3386		181	-0.0910709	-130.227		181	-0.0858779	-123.216
	181.5	-0.0391405	-73.1036		181.5	-0.109896	-131.525		181.5	-0.0728953	-120.036
	182	-0.0670531	-69.6632		182	-0.118334	-126.527		182	-0.0255088	-117.05
	182.5	-0.0917201	-71.7404		182.5	-0.126124	-123.866		182.5	0.0251233	-125.813
	183	-0.124826	-72.5843		183	-0.124826	-120.944		183	0.0627729	-124.904
	183.5	-0.159879	-74.9861		183.5	-0.066404	-116.985		183.5	0.0822468	-127.436
	184	-0.182598	-74.0124		184	-0.0157718	-119.581		184	0.0952294	-119.646
	184.5	-0.184546	-73.4282		184.5	-0.00863142	-121.918		184.5	0.104317	-128.669
	185	-0.150142	-78.4265		185	0.00824596	-121.853		185	0.106265	-129.902
	185.5	-0.138457	-75.4405		185.5	0.0504394	-117.569		185.5	0.106265	-135.29
	186	-0.205967	-77.1282		186	0.0893872	-122.243		186	0.104966	-130.357
	186.5	-0.243616	-83.5546		186.5	0.112107	-129.838		186.5	0.104317	-132.434
	187	-0.198827	-86.9301		187	0.114054	-128.474		187	0.10237	-132.11
	187.5	-0.0845796	-81.9967		187.5	0.107563	-132.953		187.5	0.0991242	-133.213
	188	0.0381059	-79.53		188	0.101721	-132.953		188	0.0913346	-133.732
	188.5	0.116651	-85.8265		188.5	0.0971768	-131.915		188.5	0.0796503	-133.927
	189	0.153002	-74.4018		189	0.0893872	-136.329		189	0.0660185	-133.408
	189.5	0.162739	-73.4282		189.5	0.0757555	-140.938		189.5	0.0569307	-135.225
	190	0.164037	-70.6369		190	0.058229	-132.759		190	0.0478429	-133.083
	190.5	0.160142	-67.2614		190.5	0.0322638	-134.057		190.5	0.0387551	-130.097
	191	0.156248	-69.0141		191	0.000456404	-133.538		191	0.0244742	-140.938
	191.5	0.147809	-69.7281		191.5	-0.0294036	-134.381		191.5	0.00824596	-132.824
	192	0.134826	-62.7824		192	-0.0573162	-121.594		192	-0.00798229	-131.006
	192.5	0.120545	-61.0298		192.5	-0.0722462	-126.722		192.5	-0.0235614	-129.513
	193	0.111458	-66.7421		193	-0.0748427	-121.269		193	-0.0391405	-131.72
	193.5	0.104317	-67.0667		193.5	-0.0735444	-121.334		193.5	-0.0579653	-133.343
	194	0.0926329	-63.0421		194	-0.0774392	-120.166		194	-0.0793866	-128.604
	194.5	0.0751063	-68.7544		194.5	-0.0826322	-122.243		194.5	-0.0956148	-128.799
	195	0.0569307	-63.7561		195	-0.0878253	-122.632		195	-0.0741935	-127.306
	195.5	0.0458955	-64.3403		195.5	-0.0761409	-116.141		195.5	-0.0988605	-123.801
	196	0.0394042	-66.1579		196	-0.0449827	-117.309		196	-0.180002	-126.981
	196.5	0.0342112	-65.8982		196.5	-0.0131753	-115.751		196.5	-0.226739	-133.473
	197	0.0270707	-66.2877		197	0.0160355	-110.818		197	-0.228686	-134.901
	197.5	0.0173338	-64.2754		197.5	0.043299	-117.244		197.5	-0.192984	-129.059
	198	0.00305292	-62.7824		198	0.0588781	-111.986		198	-0.135212	-128.604
	198.5	-0.0170701	-67.7158		198.5	0.0660185	-121.269		198.5	-0.0696496	-131.72
	199	-0.0527723	-67.6509		199	0.0673168	-123.606		199	-0.00473664	-125.099
	199.5	-0.0871762	-70.5071		199.5	0.0608255	-126.332		199.5	0.0420007	-130.422
