# Supplementary material for: Analogue closed-loop optogenetic modulation of hippocampal pyramidal cells dissociates gamma frequency and amplitude
Source: eLife. 2018 Oct 23;7:e38346. doi: 10.7554/eLife.38346 (PMC6219844; doi:10.7554/eLife.38346)
Supplement: Figure 6—source data 1. [file elife-38346-fig6-data1.xlsx]

## Sheet: Sheet1
		Source identifier
Pclamped/Punclamped		13.09.25.010	13.09.25.011	13.10.09.004	13.10.09.010	13.10.21.005	13.10.21.007	13.11.04.008	14.05.02.003	14.05.06.004	14.05.06.005	15.04.10.019	15.07.10.003	15.07.10.005&6	15.07.10.010	15.07.10.015	15.12.16.003&5	15.12.16.017	15.09.04.009	15.09.04.012		Average	SEM
	LED-LFP phase difference (º)
	-157.921		0.393129	0.362141	0.551593	0.621097			0.482434		0.250254				0.15462			0.602276				0.427193	0.0594281
	-112.801	0.504941	0.427071	0.352664	0.599979	0.754897	0.86463	0.384132	0.752445	1.22272	1.15817			0.147739	0.20581	2.94767			0.670358	0.496113		0.765955	0.18807
	-67.6806	2.2107	2.58505						1.36684	1.78426	1.18873			1.28028	1.26013	1.62655	2.08012	1.01821		1.11122		1.59201	0.181189
	-22.5602		6.71227	0.383019	1.24669			2.41353							2.12019		1.39051	0.950176				2.17377	0.945785
	22.5602	1.917	0.757741	3.11109	2.28661	2.08127		3.40536	1.52804	1.65233	1.39737			2.54805	1.84863			1.08515	1.70142	1.94949		1.94782	0.217567
	67.6806		0.931409	2.70866		2.07948			1.04618	0.987388	0.924031	0.905716	0.30004	1.62566	1.03396	2.70747			0.992654	1.17439		1.33977	0.220779
	112.801				0.975843				1.01898	0.531042	0.483374	1.39879			0.504628							0.818777	0.152222
	157.921		0.180258		0.883279					0.820879												0.628138	0.224664
Fclamped/Funclamped
	LED-LFP phase difference (º)
	-157.921		1.16657	1.18572	1.09252	1.1759			1.11017		1.08055				1.47911			0.943472				1.15425	0.0576331
	-112.801	1.2593	1.17101	1.20294	1.07194	1.2273	1.10277	1.13499	1.15996	1.11789	1.06932			1.46942	1.4656	1.27388			1.13578	1.13902		1.20007	0.0345337
	-67.6806	1.1456	1.14716						1.03541	1.04111	1.02285			1.26429	1.33848	0.49424	1.07048	1.12381		1.11612		1.07269	0.0760095
	-22.5602		1.07875	1.18266	1.00237			0.980891							1.24748		1.14199	0.933638				1.08111	0.0515407
	22.5602	0.852065	0.71528	0.957719	1.0461	0.964574		0.952077	0.915694	0.925428	0.938124			0.902515	0.864437			0.854235	0.947357	0.913527		0.910652	0.0228289
	67.6806		0.770782	0.987706		0.994458			0.949084	0.998808	0.85229	1.00606	0.562624	0.733354	0.702248	0.637948			0.896192	0.939456		0.84854	0.0456871
	112.801				1.02812				0.969184	0.944199	0.918424	0.782293			0.802437							0.907443	0.0393852
	157.921		0.758084		1.06734					0.991561												0.938994	0.0930626
