# Supplementary material for: Analogue closed-loop optogenetic modulation of hippocampal pyramidal cells dissociates gamma frequency and amplitude
Source: eLife. 2018 Oct 23;7:e38346. doi: 10.7554/eLife.38346 (PMC6219844; doi:10.7554/eLife.38346)
Supplement: Figure 7—source data 1. [file elife-38346-fig7-data1.xlsx]

## Sheet: Sheet1
Panel a													Panel b									Panel c											Panel d
	Pre-clamp				During clamp				Post-clamp																									Left example						Right example
	Time (ms)	LFP	Current (pA)		Time (ms)	LFP (mV)	Current (pA)		Time (ms)	LFP (mV)	Current (pA)			Time (ms)	Unclamped average LFP (mV)	Unclamped average phasic membrane current (pA)		Time (ms)	Clamped average LFP (mV)	Clamped average phasic membrane current (pA)			Phase (º)	Unclamped inhibitory current (pA)	Average vector magnitude (pA)	9.90777		Phase (º)	Clamped inhibitory current (pA)	Average vector magnitude (pA)	3.97129			Phase defined by LFP (º)	Unclamped excitatory current (pA)	Unclamped inhibitory current (pA)	Clamped excitatory current (pA)	Clamped inhibitory current (pA)		Phase defined by LFP (º)	Unclamped excitatory current (pA)	Unclamped inhibitory current (pA)	Clamped excitatory current (pA)	Clamped inhibitory current (pA)
	0	-0.044729	419.214		0	-0.0427816	464.199		0	0.0812023	453.618			0	-0.148489	3.216		0	-0.0898096	0.726			0	3.216	Angle (º)	144.338		0	0.726	Angle (º)	158.091			0	0	0	0	0		0	0	0	0	0
	0.5	0.0143419	427.199		0.5	-0.0369394	472.573		0.5	0.124045	477.376			0.17	-0.148489	3.216		0.106	-0.0898096	0.726			3.6	3.216				3.6	0.726					3.6	0	0	0	0		3.6	0	0	0	0
	1	0.0656231	462.511		1	-0.0174655	478.999		1	0.159098	485.426			0.34	-0.148489	3.216		0.211	-0.0898096	0.726			7.2	3.216				7.2	0.726					7.2	0	0	0	0		7.2	0	0	1.071	1.6655
	1.5	0.100676	485.426		1.5	0.00914883	465.692		1.5	0.180519	479.843			0.51	-0.141807	3.867		0.317	-0.0898096	0.726			10.8	3.867				10.8	0.726					10.8	0.7185	1.23725	1.932	0		10.8	0.507778	1.52413	1.83725	3.89575
	2	0.118203	491.592		2	0.0273245	476.403		2	0.18766	482.764			0.68	-0.133548	8.288		0.422	-0.089703	0.652			14.4	8.288				14.4	0.652					14.4	1.195	3.3215	1.8795	0.0755		14.4	0.744	3.19788	2.274	6.166
	2.5	0.131834	483.932		2.5	0.0442019	471.664		2.5	0.182467	477.182			0.85	-0.133548	8.288		0.528	-0.0783384	1.439			18	8.288				18	1.439					18	1.177	3.38575	2.2075	1.2585		18	0.772444	3.19	2.7555	7.85025
	3	0.143519	478.415		3	0.0669214	477.636		3	0.16494	476.987			1.019	-0.117958	8.797		0.633	-0.0757903	1.38			21.6	8.797				21.6	1.38					21.6	1.39325	4.32425	2.191	1.356		21.6	1.19844	5.45025	3.55225	9.7255
	3.5	0.153905	474.52		3.5	0.0902901	478.22		3.5	0.151957	485.815			1.189	-0.0977338	10.458		0.739	-0.0757903	1.38			25.2	10.458				25.2	1.38					25.2	1.57575	6.224	2.6925	1.356		25.2	1.20744	7.45	4.0605	11.489
	4	0.163642	469.522		4	0.111062	483.413		4	0.14287	483.738			1.359	-0.0950701	10.977		0.845	-0.0756644	1.226			28.8	10.977				28.8	1.226					28.8	1.631	6.42475	2.795	1.393		28.8	1.26144	7.78562	4.701	14.369
	4.5	0.16494	453.294		4.5	0.122097	485.555		4.5	0.14222	478.739			1.529	-0.0840909	12.931		0.95	-0.0687371	1.665			32.4	12.931				32.4	1.665					32.4	1.85525	8.11925	2.8355	1.4045		32.4	1.64289	10.7278	5.29525	16.4885
	5	0.164291	466.211		5	0.121448	488.282		5	0.14222	472.183			1.699	-0.0635202	16.204		1.056	-0.0504742	2.452			36	16.204				36	2.452					36	2.29525	10.0773	3.181	2.6425		36	1.95578	12.9173	6.63175	18.8547
	5.5	0.154554	467.769		5.5	0.117554	478.415		5.5	0.143519	469.067			1.869	-0.0570177	16.376		1.161	-0.0486044	2.795			39.6	16.376				39.6	2.795					39.6	2.41825	10.786	3.0395	2.969		39.6	1.95556	13.6939	7.30675	21.9378
	6	0.141571	463.874		6	0.111711	475.883		6	0.129887	465.302			2.039	-0.04887	19.603		1.267	-0.0444286	2.743			43.2	19.603				43.2	2.743					43.2	3.102	13.014	2.9045	3.43		43.2	1.98267	15.954	7.15075	25.1818
	6.5	0.131185	463.355		6.5	0.111711	466.017		6.5	0.116255	465.173			2.209	-0.0337049	21.429		1.372	-0.0401269	2.682			46.8	21.429				46.8	2.682					46.8	3.5415	14.98	2.756	3.7065		46.8	2.05456	17.9515	7.249	27.8152
	7	0.125992	464.653		7	0.103922	472.703		7	0.10522	466.795			2.379	-0.0191779	23.111		1.478	-0.0283069	4.183			50.4	23.111				50.4	4.183					50.4	3.7485	16.319	2.699	4.651		50.4	2.16689	19.5094	7.16925	30.4633
	7.5	0.123396	457.383		7.5	0.0915883	468.678		7.5	0.0954831	459.266			2.549	-0.00705704	24.621		1.584	-0.0164095	5.383			54	24.621				54	5.383					54	3.53425	18.2627	1.951	5.982		54	2.23311	21.3208	7.23175	33.28
	8	0.115606	462.057		8	0.0760092	459.72		8	0.089641	460.174			2.718	0.0143978	25.512		1.689	-0.0145396	5.646			57.6	25.512				57.6	5.646					57.6	3.79525	19.7135	1.7925	6.0885		57.6	2.28556	23.1756	6.972	36.374
	8.5	0.101974	465.367		8.5	0.0422545	460.045		8.5	0.0883427	467.704			2.888	0.0266418	26.891		1.795	-0.00537424	5.841			61.2	26.891				61.2	5.841					61.2	3.8515	21.278	1.232	6.385		61.2	2.33067	24.662	6.72925	38.6948
	9	0.085097	462.641		9	-0.00253551	450.827		9	0.0889918	461.797			3.058	0.0452763	29.17		1.9	-0.00131476	7.162			64.8	29.17				64.8	7.162					64.8	4.0255	22.9585	1.0795	7.3635		64.8	2.57256	26.4296	6.4315	41.0942
	9.5	0.0721144	457.773		9.5	-0.049922	457.448		9.5	0.0779566	462.316			3.228	0.0655224	29.294		2.006	0.00103955	7.527			68.4	29.294				68.4	7.527					68.4	3.98475	24.4973	0.906	8.2165		68.4	2.82267	28.6484	6.037	42.4573
	10	0.0636758	459.201		10	-0.0927646	454.073		10	0.0604301	450.372			3.398	0.0823326	29.778		2.112	0.0112222	10.188			72	29.778				72	10.188					72	3.837	26.224	0.2015	10.565		72	2.76856	30.136	5.30175	44.6318
	10.5	0.0571845	459.201		10.5	-0.112888	449.269		10.5	0.0409562	450.632			3.568	0.0949235	30.206		2.217	0.0165315	9.977			75.6	30.206				75.6	9.977					75.6	3.74975	26.561	-0.0165	10.575		75.6	2.735	30.8929	4.702	45.0312
	11	0.0558862	457.643		11	-0.101203	448.555		11	0.0273245	450.632			3.738	0.11132	31.523		2.323	0.0208138	10.46			79.2	31.523				79.2	10.46					79.2	3.83825	28.2138	-0.4385	11.316		79.2	2.64444	33.2944	4.52825	45.3763
	11.5	0.0429036	444.336		11.5	-0.0882207	451.93		11.5	0.0175875	446.867			3.908	0.122019	33.092		2.428	0.0245632	11.409			82.8	33.092				82.8	11.409					82.8	4.0515	29.1637	-0.785	12.361		82.8	2.59078	34.7383	4.037	46.3288
	12	0.0162893	442.648		12	-0.0388868	449.464		12	0.00785057	442.129			4.078	0.135662	33.937		2.534	0.03555	12.173			86.4	33.937				86.4	12.173					86.4	4.00175	29.6922	-1.1045	13.019		86.4	2.65611	35.6406	3.231	47.7645
	12.5	-0.0181146	441.414		12.5	-0.0343429	459.85		12.5	-0.00513203	446.348			4.248	0.150189	33.684		2.639	0.0422545	12.473			90	33.684				90	12.473					90	3.646	30.395	-1.978	13.4295		90	2.42467	37.5089	2.4505	47.33
	13	-0.0570624	444.79		13	-0.0629046	480.882		13	-0.0207112	442.648			4.417	0.154543	36.325		2.745	0.0422545	12.473			93.6	36.325				93.6	12.473					93.6	3.71525	31.5685	-2.4685	13.4295		93.6	2.36922	38.6352	2.061	47.8853
	13.5	-0.0986068	448.165		13.5	-0.0590098	486.399		13.5	-0.0330446	437.455			4.587	0.163373	38.564		2.851	0.0486198	13.031			97.2	38.564				97.2	13.031					97.2	3.48125	31.8542	-2.904	14.0795		97.2	2.33967	39.3755	1.61075	48.366
	14	-0.125221	441.285		14	-0.0246059	489.515		14	-0.0395359	431.028			4.757	0.167716	39.259		2.956	0.0536966	13.316			100.8	39.259				100.8	13.316					100.8	3.449	32.8043	-3.675	14.663		100.8	2.21333	40.5523	0.7095	49.128
	14.5	-0.126519	443.297		14.5	0.0234297	495.098		14.5	-0.0246059	433.106			4.927	0.172976	40.104		3.062	0.0624744	13.85			104.4	40.104				104.4	13.85					104.4	3.35725	33.2568	-3.6685	15.224		104.4	2.16533	41.3984	0.23675	48.919
	15	-0.1038	448.101		15	0.0656231	503.601		15	-0.00513203	422.2			5.097	0.178001	42.323		3.167	0.0711359	13.898			108	42.323				108	13.898					108	3.37375	34.0122	-4.501	15.349		108	2.13533	42.1421	-0.61125	50.061
	15.5	-0.0745889	447.971		15.5	0.0954831	499.447		15.5	0.0110962	419.084			5.267	0.178706	42.951		3.273	0.0761158	14.284			111.6	42.951				111.6	14.284					111.6	3.3165	34.35	-5.1565	15.485		111.6	2.08611	42.6956	-1.35025	50.8085
	16	-0.0512203	449.204		16	0.114308	495.098		16	0.0162893	421.227			5.437	0.180743	43.067		3.378	0.0863759	15.037			115.2	43.067				115.2	15.037					115.2	3.3315	34.6185	-5.0195	16.195		115.2	1.99367	43.1899	-1.812	51.3492
	16.5	-0.0233077	449.074		16.5	0.120799	490.359		16.5	0.0175875	437			5.607	0.180642	43.913		3.484	0.0863759	15.037			118.8	43.913				118.8	15.037					118.8	3.424	35.556	-5.4445	16.195		118.8	1.78167	43.3791	-2.48275	52.1193
	17	0.00979796	478.22		17	0.121448	490.229		17	0.0260262	443.232			5.777	0.180206	44.404		3.59	0.0977987	15.449			122.4	44.404				122.4	15.449					122.4	3.06025	35.2867	-5.5755	16.7975		122.4	1.58533	43.688	-3.037	52.787
	17.5	0.0435527	488.022		17.5	0.114308	485.815		17.5	0.0344649	443.492			5.947	0.179355	44.677		3.695	0.10897	16.012			126	44.677				126	16.012					126	2.8975	34.9583	-6.143	16.9215		126	1.49267	43.8349	-3.60025	52.1658
	18	0.079904	496.071		18	0.0987288	481.271		18	0.0493949	441.739			6.116	0.176658	44.084		3.801	0.109764	16.33			129.6	44.084				129.6	16.33					129.6	2.71975	35.0075	-6.5545	17.237		129.6	1.26489	43.977	-4.2275	52.464
	18.5	0.127291	500.096		18.5	0.0721144	486.529		18.5	0.0721144	441.804			6.286	0.174229	43.863		3.906	0.117815	15.991			133.2	43.863				133.2	15.991					133.2	2.694	34.8642	-6.4405	17.11		133.2	1.18467	43.8974	-5.1635	52.507
	19	0.165589	500.291		19	0.0377106	484.062		19	0.103922	455.436			6.456	0.172226	43.102		4.012	0.119685	15.659			136.8	43.102				136.8	15.659					136.8	2.621	34.4477	-6.9825	16.7415		136.8	0.999444	44.0256	-5.4305	52.119
	19.5	0.183116	500.485		19.5	-0.00123725	480.947		19.5	0.124694	455.63			6.626	0.169439	42.648		4.117	0.126544	16.11			140.4	42.648				140.4	16.11					140.4	2.335	34.08	-6.6985	17.2565		140.4	1.002	43.9615	-5.67525	51.7133
	20	0.182467	498.084		20	-0.0473255	476.532		20	0.138975	470.56			6.796	0.166664	42.508		4.223	0.134731	15.983			144	42.508				144	15.983					144	2.27975	33.4072	-6.896	17.294		144	0.757444	43.7448	-6.4515	51.4045
	20.5	0.17273	495.033		20.5	-0.1038	474.001		20.5	0.148063	497.37			6.966	0.164716	42.262		4.329	0.138917	15.702			147.6	42.262				147.6	15.702					147.6	2.26825	33.1902	-7.082	17.1555		147.6	0.786556	43.5571	-7	51.0795
	21	0.166887	490.748		21	-0.147292	473.611		21	0.151957	509.378			7.136	0.161146	41.919		4.434	0.139576	15.644			151.2	41.919				151.2	15.644					151.2	2.08925	33.141	-7.252	17.1195		151.2	0.684333	42.8667	-7.46925	51.1123
	21.5	0.159747	483.024		21.5	-0.166116	463.485		21.5	0.147414	501.978			7.306	0.158908	40.983		4.54	0.143509	15.566			154.8	40.983				154.8	15.566					154.8	1.76825	32.318	-7.049	17.251		154.8	0.701333	41.9437	-7.728	50.6333
	22	0.151957	473.027		22	-0.164818	461.602		22	0.137027	498.213			7.476	0.155751	40.064		4.645	0.145456	15.678			158.4	40.064				158.4	15.678					158.4	1.651	32.0362	-6.9285	17.4595		158.4	0.553556	41.5854	-7.278	49.8882
	22.5	0.14222	470.625		22.5	-0.131063	461.083		22.5	0.129238	494.578			7.646	0.152629	39.468		4.751	0.148964	15.524			162	39.468				162	15.524					162	1.2475	31.33	-6.9435	17.3995		162	0.388333	41.1959	-7.68975	48.6348
	23	0.131834	464.134		23	-0.0564133	460.759		23	0.12015	484.387			7.815	0.149932	38.076		4.856	0.150756	15.778			165.6	38.076				165.6	15.778					165.6	1.11075	30.3992	-6.7365	17.216		165.6	0.233	40.1191	-7.92175	48.002
	23.5	0.120799	456.28		23.5	0.0571845	484.647		23.5	0.113659	478.675			7.985	0.146451	37.652		4.962	0.150756	15.778			169.2	37.652				169.2	15.778					169.2	1.0725	29.7115	-6.7435	17.216		169.2	-0.055	39.3921	-8.31775	47.0985
	24	0.106518	449.139		24	0.0980796	502.108		24	0.10522	473.611			8.155	0.143989	36.958		5.068	0.152277	14.782			172.8	36.958				172.8	14.782					172.8	1.07675	29.3075	-6.6845	16.9075		172.8	-0.266	38.8154	-8.08625	45.8188
	24.5	0.0954831	445.504		24.5	0.101325	507.561		24.5	0.0935357	463.745			8.325	0.141012	36.468		5.173	0.152277	14.782			176.4	36.468				176.4	14.782					176.4	0.84575	28.4243	-7.05	16.9075		176.4	-0.516444	37.6908	-8.1725	44.6883
	25	0.0825005	447.646		25	0.127291	510.028		25	0.079904	461.538			8.495	0.135282	35.405		5.279	0.152064	14.36			180	35.405				180	14.36					180	0.7275	27.2252	-6.621	16.35		180	-0.693444	36.5963	-7.88575	42.969
	25.5	0.0669214	449.658		25.5	0.166887	515.545		25.5	0.0662723	456.539			8.665	0.135282	35.405		5.384	0.152064	14.36			183.6	35.405				183.6	14.36					183.6	0.7275	27.2252	-6.621	16.35		183.6	-0.693444	36.5963	-8.14725	42.2925
	26	0.0519914	443.751		26	0.201291	523.335		26	0.059781	459.85			8.835	0.132472	34.469		5.49	0.152578	14.784			187.2	34.469				187.2	14.784					187.2	0.82925	25.613	-6.683	16.6485		187.2	-0.701333	35.0801	-7.917	41.042
	26.5	0.0442019	437.585		26.5	0.21687	527.294		26.5	0.050044	454.008			9.005	0.129014	33.315		5.595	0.149429	14.168			190.8	33.315				190.8	14.168					190.8	0.5705	24.9005	-6.7385	15.792		190.8	-0.585222	34.1036	-8.02475	40.32
	27	0.0266753	438.169		27	0.212327	516.454		27	0.0429036	440.311			9.175	0.126093	32.719		5.701	0.149429	14.168			194.4	32.719				194.4	14.168					194.4	0.465	24.3152	-6.942	15.792		194.4	-0.783556	33.3745	-8.30325	39.1323
	27.5	-0.000588119	434.079		27.5	0.198046	516		27.5	0.0331666	439.337			9.345	0.123205	31.839		5.807	0.145573	13.468			198	31.839				198	13.468					198	0.04725	23.6812	-6.7345	15.028		198	-0.979556	31.7674	-8.2415	38.0723
	28	-0.0310972	428.756		28	0.178572	506.522		28	0.0227806	435.118			9.514	0.119322	31.093		5.912	0.14534	13.698			201.6	31.093				201.6	13.698					201.6	0.0595	23.3918	-6.562	15.0585		201.6	-1.11067	30.8616	-7.74075	36.545
	28.5	-0.0687468	430.379		28.5	0.162344	510.222		28.5	0.00135927	440.7			9.684	0.116535	29.512		6.018	0.143247	13.293			205.2	29.512				205.2	13.293					205.2	0.0575	22.5107	-6.4295	14.7785		205.2	-1.14789	30.1479	-7.51975	34.968
	29	-0.114186	425.576		29	0.140273	506.717		29	-0.0239568	434.923			9.854	0.113345	28.637		6.123	0.140099	12.212			208.8	28.637				208.8	12.212					208.8	-0.02175	21.652	-6.1495	14.0475		208.8	-1.27356	28.9943	-7.68675	33.7373
	29.5	-0.159625	421.681		29.5	0.102624	495.617		29.5	-0.0466764	431.483			10.024	0.108824	27.581		6.229	0.138432	11.623			212.4	27.581				212.4	11.623					212.4	-0.43075	20.701	-6.3305	13.6785		212.4	-1.41233	27.996	-7.34075	32.72
	30	-0.201818	425.186		30	0.0552371	496.526		30	-0.0713433	439.662			10.194	0.104784	26.63		6.335	0.13354	11.187			216	26.63				216	11.187					216	-0.7225	19.3095	-6.216	12.9495		216	-1.21911	26.5926	-7.212	31.5628
	30.5	-0.229731	430.379		30.5	0.00330666	490.294		30.5	-0.101203	439.402			10.364	0.102568	26		6.44	0.130895	10.96			219.6	26				219.6	10.96					219.6	-0.7385	19.1387	-6.0425	12.594		219.6	-1.25889	25.7948	-7.059	30.185
	31	-0.217398	428.432		31	-0.034992	482.44		31	-0.144046	450.827			10.534	0.0990757	25.046		6.546	0.127213	10.626			223.2	25.046				223.2	10.626					223.2	-0.66425	18.7977	-5.662	11.785		223.2	-1.34378	24.201	-7.202	28.372
	31.5	-0.16352	436.092		31.5	-0.0525185	482.504		31.5	-0.177151	442.193			10.704	0.0955503	24.168		6.651	0.125275	10.76			226.8	24.168				226.8	10.76					226.8	-0.4095	17.686	-5.699	11.773		226.8	-1.61456	23.2264	-6.845	26.9523
	32	-0.0479746	431.418		32	-0.0609572	478.025		32	-0.177151	448.165			10.874	0.0917338	22.761		6.757	0.120344	10.221			230.4	22.761				230.4	10.221					230.4	-0.60825	16.5895	-5.576	11.1825		230.4	-1.56744	22.4002	-6.30825	25.3288
	32.5	0.044851	435.118		32.5	-0.0732907	472.443		32.5	-0.116782	443.751			11.044	0.0890702	22.1		6.862	0.117592	9.596			234	22.1				234	9.596					234	-0.74	15.8552	-5.5925	11.2465		234	-1.57956	21.2824	-6.5675	23.6483
	33	0.0714653	436.157		33	-0.0836768	469.522		33	-0.0362903	446.997			11.213	0.0841122	21.928		6.968	0.114395	9.032			237.6	21.928				237.6	9.032					237.6	-1.02825	14.9715	-5.635	10.768		237.6	-1.70789	20.6219	-6.412	22.0823
	33.5	0.100027	436.611		33.5	-0.0674485	468.483		33.5	-0.0220094	486.724			11.383	0.0810232	20.82		7.074	0.107574	8.193			241.2	20.82				241.2	8.193					241.2	-0.917	14.192	-5.933	10.146		241.2	-1.80422	19.4894	-6.03275	20.8715
	34	0.144168	456.28		34	-0.0285007	468.548		34	-0.0116233	493.41			11.553	0.0781916	19.699		7.179	0.107032	8.024			244.8	19.699				244.8	8.024					244.8	-1.062	13.4763	-6.334	10.0985		244.8	-1.97122	18.424	-5.88025	19.5083
	34.5	0.184414	474.91		34.5	0.0266753	460.174		34.5	0.0234297	489.905			11.723	0.0732336	18.579		7.285	0.101558	7.763			248.4	18.579				248.4	7.763					248.4	-1.1795	12.6085	-6.4035	9.691		248.4	-1.99122	17.5781	-5.90825	18.1795
	35	0.209081	497.434		35	0.079904	462.901		35	0.0701671	489.255			11.893	0.069462	17.922		7.39	0.0944465	7.058			252	17.922				252	7.058					252	-1.193	11.9578	-6.48	9.055		252	-2.10222	16.7579	-5.9545	17.0415
	35.5	0.214923	506.133		35.5	0.122747	458.292		35.5	0.118852	481.79			12.063	0.067246	17.166		7.496	0.0916755	6.747			255.6	17.166				255.6	6.747					255.6	-1.238	11.5745	-6.4155	8.7525		255.6	-2.01744	15.8567	-5.69575	15.812
	36	0.211028	509.573		36	0.147414	464.848		36	0.159098	478.934			12.233	0.0623551	15.69		7.601	0.0861143	6.372			259.2	15.69				259.2	6.372					259.2	-1.47925	10.618	-6.7505	8.3015		259.2	-2.10844	14.7973	-5.602	14.6953
	36.5	0.20259	514.247		36.5	0.164291	471.21		36.5	0.177274	472.767			12.403	0.0591095	15.36		7.707	0.0806016	5.975			262.8	15.36				262.8	5.975					262.8	-1.61425	9.98575	-6.891	7.6925		262.8	-2.04778	13.8329	-5.44025	13.4805
	37	0.191554	516.194		37	0.176624	473.741		37	0.180519	472.378			12.573	0.0553154	14.845		7.813	0.0746819	5.667			266.4	14.845				266.4	5.667					266.4	-1.7865	9.39775	-6.9355	7.0535		266.4	-2.10378	13.1614	-5.187	12.1947
	37.5	0.178572	514.636		37.5	0.181817	476.987		37.5	0.175326	468.418			12.743	0.0480631	13.705		7.918	0.0667567	5.412			270	13.705				270	5.412					270	-1.51425	8.1975	-6.866	6.794		270	-2.04011	11.5876	-4.809	10.771
	38	0.166238	513.403		38	0.174677	478.61		38	0.163642	471.21			12.912	0.045377	13.209		8.024	0.0662238	5.29			273.6	13.209				273.6	5.29					273.6	-1.72	7.6255	-6.695	6.6685		273.6	-2.127	10.852	-5.00875	9.515
	38.5	0.154554	507.95		38.5	0.159747	475.429		38.5	0.151308	476.792			13.082	0.0401616	12.402		8.129	0.0599651	5.145			277.2	12.402				277.2	5.145					277.2	-1.46175	7.228	-6.5505	6.2615		277.2	-2.07	10.3455	-5.10775	8.80125
	39	0.147414	500.55		39	0.137677	471.988		39	0.138326	462.641			13.252	0.0357072	11.764		8.235	0.0535513	4.685			280.8	11.764				280.8	4.685					280.8	-1.6055	6.28625	-6.5675	5.67		280.8	-2.128	9.3745	-4.74925	8.054
	39.5	0.140922	496.526		39.5	0.107817	472.508		39.5	0.125343	458.876			13.422	0.0284884	11.239		8.34	0.0468081	4.04			284.4	11.239				284.4	4.04					284.4	-1.4345	5.604	-6.6535	5.2585		284.4	-2.11567	8.29037	-4.812	7.19525
	40	0.13508	491.787		40	0.0753601	466.276		40	0.107817	457.708			13.592	0.02024	10.469		8.446	0.0366351	3.448			288	10.469				288	3.448					288	-1.5065	4.84775	-6.5165	4.4375		288	-2.15344	7.31225	-4.7335	5.64975
	40.5	0.119501	486.01		40.5	0.0467984	470.56		40.5	0.0909392	455.436			13.762	0.0163452	9.961		8.552	0.029204	2.987			291.6	9.961				291.6	2.987					291.6	-1.582	4.35775	-6.3955	4.0455		291.6	-2.28422	6.72538	-4.6235	4.40175
	41	0.102624	483.997		41	0.0227806	488.282		41	0.0844479	453.683			13.932	0.00900334	9.021		8.657	0.024292	2.703			295.2	9.021				295.2	2.703					295.2	-1.823	3.48975	-6.3595	3.8495		295.2	-2.332	5.80413	-4.746	3.1115
	41.5	0.0909392	476.078		41.5	0.00525405	490.424		41.5	0.0792549	449.269			14.102	0.00122497	8.243		8.763	0.0200193	3.062			298.8	8.243				298.8	3.062					298.8	-1.706	2.7575	-6.5365	3.734		298.8	-2.34289	5.02825	-4.66175	2.281
	42	0.0818514	473.027		42	0.000710141	485.166		42	0.0792549	452.32			14.272	-0.006005	7.372		8.868	0.0140609	2.98			302.4	7.372				302.4	2.98					302.4	-1.60525	1.898	-6.9085	3.5675		302.4	-2.337	4.38313	-4.73075	1.299
	42.5	0.0773075	474.52		42.5	0.0110962	485.555		42.5	0.0805531	457.059			14.442	-0.0132126	6.705		8.974	0.00372327	2.393			306	6.705				306	2.393					306	-1.68775	1.04325	-6.863	2.9665		306	-2.27611	3.4825	-4.62475	0.45225
	43	0.0675705	463.095		43	0.0260262	475.883		43	0.0714653	447.776			14.611	-0.0204537	5.321		9.079	-0.00407598	2.067			309.6	5.321				309.6	2.067					309.6	-1.7385	0.34525	-7.0165	2.5525		309.6	-2.17022	2.91625	-4.72825	-0.1695
	43.5	0.0584827	464.718		43.5	0.0442019	483.673		43.5	0.0623775	453.034			14.781	-0.0289708	4.804		9.185	-0.0120981	1.293			313.2	4.804				313.2	1.293					313.2	-1.8805	0.01275	-7.0385	1.7755		313.2	-1.91367	2.282	-4.528	-0.415
	44	0.0383597	461.408		44	0.0591318	482.44		44	0.0461492	444.855			14.951	-0.0377005	4.628		9.291	-0.0152178	1.838			316.8	4.628				316.8	1.838					316.8	-1.719	-0.77625	-6.3655	1.891		316.8	-1.93211	1.08238	-4.788	-1.865
	44.5	0.00330666	453.488		44.5	0.0766584	488.347		44.5	0.0312193	446.478			15.121	-0.0475157	4.36		9.396	-0.0192869	1.397			320.4	4.36				320.4	1.397					320.4	-1.59275	-1.15875	-5.8155	1.806		320.4	-1.88989	0.1765	-4.42025	-2.39
	45	-0.0440798	452.06		45	0.094834	485.88		45	0.0143419	441.155			15.291	-0.0550479	3.231		9.502	-0.0286751	1.023			324	3.231				324	1.023					324	-1.7265	-1.54375	-5.7405	1.342		324	-1.83989	-0.113125	-3.96025	-3.372
	45.5	-0.0817294	457.188		45.5	0.103922	485.75		45.5	-0.00383377	435.507			15.461	-0.0654564	2.439		9.607	-0.0418612	0.702			327.6	2.439				327.6	0.702					327.6	-1.6515	-2.08875	-5.513	1.067		327.6	-1.88811	-1.00725	-3.6915	-3.3765
	46	-0.103151	454.008		46	0.106518	483.997		46	-0.0252551	439.467			15.631	-0.0744546	1.573		9.713	-0.0480715	0.83			331.2	1.573				331.2	0.83					331.2	-1.198	-2.89725	-5.454	1.4035		331.2	-1.691	-1.79937	-4.15875	-4.0175
	46.5	-0.11094	448.879		46.5	0.111711	478.869		46.5	-0.0505711	435.507			15.801	-0.0766259	1.62		9.818	-0.0480715	0.83			334.8	1.62				334.8	0.83					334.8	-1.1305	-3.0585	-4.32	1.4035		334.8	-1.60222	-1.85787	-3.663	-4.62825
	47	-0.118081	442.388		47	0.120799	475.818		47	-0.0791329	434.664			15.971	-0.0945217	1.244		9.924	-0.0480715	0.83			338.4	1.244				338.4	0.83					338.4	-1.0135	-3.076	-3.997	1.4035		338.4	-1.38756	-2.7015	-3.0655	-5.09225
	47.5	-0.123923	434.209		47.5	0.126641	475.234		47.5	-0.0953611	431.548			16.141	-0.102334	1.218		10.03	-0.0590583	0.509			342	1.218				342	0.509					342	-0.87125	-2.723	-3.448	0.863		342	-0.937556	-3.09688	-2.3675	-5.481
	48	-0.0856242	440.246		48	0.122097	468.548		48	-0.0791329	432.197			16.31	-0.102334	1.218		10.135	-0.0780768	0			345.6	1.218				345.6	0					345.6	-0.87125	-2.723	-3.0765	0.411		345.6	-0.917111	-3.09688	-2.219	-5.4265
	48.5	-0.0473255	442.193		48.5	0.111062	471.469		48.5	-0.0375885	436.351			16.48	-0.121382	0		10.241	-0.0780768	0			349.2	0				349.2	0					349.2	-0.77425	-3.07675	-3.0765	0.411		349.2	-0.445222	-3.30262	-1.8405	-5.09975
	49	-0.0590098	465.043		49	0.0857462	467.51		49	0.044851	438.104			16.65	-0.131511	0.752		10.346	-0.0780768	0			352.8	0.752				352.8	0					352.8	-0.1755	-2.12475	-0.8785	0.411		352.8	-0.317222	-2.13275	-0.95575	-4.975
	49.5	-0.0421324	473.806		49.5	0.0623775	466.017		49.5	0.074711	455.76			16.82	-0.131511	0.752		10.452	-0.0780768	0			356.4	0.752				356.4	0					356.4	-0.1755	-2.12475	-0.8785	0.411		356.4	-0.317222	-2.13275	-0.111	-4.26725
	50	0.0234297	476.662		50	0.0480966	465.952		50	0.0383597	455.566			16.99	-0.148489	3.216		10.558	-0.0898096	0.726																					0	0	0	0
	50.5	0.0987288	487.697		50.5	0.0396579	464.394		50.5	0.0182367	456.994			17.16	-0.148489	3.216		10.663	-0.0898096	0.726
	51	0.151957	502.627		51	0.014991	458.746		51	0.0455001	453.488			17.33	-0.148489	3.216		10.769	-0.0898096	0.726
	51.5	0.183116	498.733		51.5	-0.0142198	464.134		51.5	0.0935357	454.462			17.5	-0.141807	3.867		10.874	-0.0898096	0.726
	52	0.192203	509.573		52	-0.0285007	461.408		52	0.137677	459.72			17.67	-0.133548	8.288		10.98	-0.089703	0.652
	52.5	0.192203	505.159		52.5	-0.0434307	457.578		52.5	0.168186	468.288			17.839	-0.133548	8.288		11.085	-0.0783384	1.439
	53	0.181168	511.585		53	-0.059659	455.436		53	0.181168	471.404			18.009	-0.117958	8.797		11.191	-0.0757903	1.38
	53.5	0.169484	498.798		53.5	-0.0726416	456.409		53.5	0.181817	461.148			18.179	-0.0977338	10.458		11.297	-0.0757903	1.38
	54	0.151308	501.524		54	-0.0732907	461.343		54	0.170133	469.457			18.349	-0.0950701	10.977		11.402	-0.0756644	1.226
	54.5	0.134431	497.694		54.5	-0.0629046	470.625		54.5	0.159747	460.304			18.519	-0.0840909	12.931		11.508	-0.0687371	1.665
	55	0.122097	502.627		55	-0.0317464	477.376		55	0.147414	461.797			18.689	-0.0635202	16.204		11.613	-0.0504742	2.452
	55.5	0.112361	499.771		55.5	0.00655231	475.234		55.5	0.136378	463.55			18.859	-0.0570177	16.376		11.719	-0.0486044	2.795
	56	0.102624	503.341		56	0.0467984	476.208		56	0.12794	469.587			19.029	-0.04887	19.603		11.824	-0.0444286	2.743
	56.5	0.0909392	503.471		56.5	0.0753601	473.482		56.5	0.117554	464.264			19.199	-0.0337049	21.429		11.93	-0.0401269	2.682
	57	0.0863953	497.045		57	0.0974305	481.596		57	0.114308	454.073			19.369	-0.0191779	23.111		12.036	-0.0283069	4.183
	57.5	0.0760092	493.345		57.5	0.107817	489.255		57.5	0.109764	448.879			19.538	-0.00705704	24.621		12.141	-0.0164095	5.383
	58	0.064974	491.527		58	0.116255	487.438		58	0.104571	444.855			19.708	0.0143978	25.512		12.247	-0.0145396	5.646
	58.5	0.0545879	486.464		58.5	0.118852	490.878		58.5	0.0967814	449.334			19.878	0.0266418	26.891		12.352	-0.00537424	5.841
	59	0.0416053	484.387		59	0.118203	479.713		59	0.089641	453.229			20.048	0.0452763	29.17		12.458	-0.00131476	7.162
	59.5	0.0318684	473.611		59.5	0.107817	482.375		59.5	0.0825005	457.708			20.218	0.0655224	29.294		12.564	0.00103955	7.527
	60	0.0175875	473.027		60	0.0883427	491.917		60	0.0682197	461.538			20.388	0.0823326	29.778		12.669	0.0112222	10.188
	60.5	-0.00253551	471.404		60.5	0.0682197	487.373		60.5	0.0539388	456.15			20.558	0.0949235	30.206		12.775	0.0165315	9.977
	61	-0.0239568	493.085		61	0.0416053	473.806		61	0.0396579	455.63			20.728	0.11132	31.523		12.88	0.0208138	10.46
	61.5	-0.0479746	486.269		61.5	0.00590318	475.299		61.5	0.0188858	457.643			20.898	0.122019	33.092		12.986	0.0245632	11.409
	62	-0.0752381	478.285		62	-0.0343429	480.232		62	-0.00967594	446.997			21.068	0.135662	33.937		13.091	0.03555	12.173
	62.5	-0.112888	477.182		62.5	-0.0719924	485.555		62.5	-0.044729	451.865			21.237	0.150189	33.684		13.197	0.0422545	12.473
	63	-0.147941	478.545		63	-0.105098	481.401		63	-0.0719924	444.465			21.407	0.154543	36.325		13.303	0.0422545	12.473
	63.5	-0.164818	482.699		63.5	-0.118081	480.427		63.5	-0.0973085	442.388			21.577	0.163373	38.564		13.408	0.0486198	13.031
	64	-0.153134	480.427		64	-0.0836768	486.01		64	-0.120677	465.043			21.747	0.167716	39.259		13.514	0.0536966	13.316
	64.5	-0.121326	505.289		64.5	-0.0953611	479.973		64.5	-0.140151	474.52			21.917	0.172976	40.104		13.619	0.0624744	13.85
	65	-0.0726416	514.312		65	-0.136905	478.22		65	-0.144046	481.401			22.087	0.178001	42.323		13.725	0.0711359	13.898
	65.5	-0.0103251	528.203		65.5	-0.129116	485.361		65.5	-0.0908172	478.999			22.257	0.178706	42.951		13.83	0.0761158	14.284
	66	0.050044	523.789		66	-0.0531677	493.864		66	-0.0680976	474.131			22.427	0.180743	43.067		13.936	0.0863759	15.037
	66.5	0.103273	517.298		66.5	0.0455001	491.657		66.5	-0.0927646	466.925			22.597	0.180642	43.913		14.042	0.0863759	15.037
	67	0.146115	514.117		67	0.131185	510.612		67	-0.0934137	475.948			22.767	0.180206	44.404		14.147	0.0977987	15.449
	67.5	0.170782	509.963		67.5	0.183765	519.44		67.5	-0.0525185	463.42			22.936	0.179355	44.677		14.253	0.10897	16.012
	68	0.185712	524.828		68	0.205835	511.91		68	0.0084997	465.173			23.106	0.176658	44.084		14.358	0.109764	16.33
	68.5	0.1948	538.07		68.5	0.209081	510.742		68.5	0.0636758	464.783			23.276	0.174229	43.863		14.464	0.117815	15.991
	69	0.196747	538.265		69	0.198695	508.859		69	0.103922	465.043			23.446	0.172226	43.102		14.569	0.119685	15.659
	69.5	0.196747	529.242		69.5	0.177923	508.145		69.5	0.132484	461.732			23.616	0.169439	42.648		14.675	0.126544	16.11
	70	0.190256	527.359		70	0.152607	501.978		70	0.145466	461.213			23.786	0.166664	42.508		14.781	0.134731	15.983
	70.5	0.182467	523.205		70.5	0.125343	499.252		70.5	0.147414	455.436			23.956	0.164716	42.262		14.886	0.138917	15.702
	71	0.169484	519.959		71	0.0980796	483.673		71	0.147414	458.552			24.126	0.161146	41.919		14.992	0.139576	15.644
	71.5	0.152607	511.715		71.5	0.0740618	484.776		71.5	0.151308	457.967			24.296	0.158908	40.983		15.097	0.143509	15.566
	72	0.140922	504.185		72	0.0474475	488.411		72	0.161045	459.915			24.466	0.155751	40.064		15.203	0.145456	15.678
	72.5	0.125992	505.224		72.5	0.00979796	484.387		72.5	0.165589	452.644			24.635	0.152629	39.468		15.308	0.148964	15.524
	73	0.111711	496.201		73	-0.0220094	483.283		73	0.164291	453.294			24.805	0.149932	38.076		15.414	0.150756	15.778
	73.5	0.0987288	494.578		73.5	-0.0460272	480.168		73.5	0.159747	452.969			24.975	0.146451	37.652		15.52	0.150756	15.778
	74	0.0876936	492.566		74	-0.0590098	475.883		74	0.153905	448.75			25.145	0.143989	36.958		15.625	0.152277	14.782
	74.5	0.0734127	488.152		74.5	-0.0674485	476.792		74.5	0.147414	446.478			25.315	0.141012	36.468		15.731	0.152277	14.782
	75	0.0623775	488.671		75	-0.0739398	475.429		75	0.141571	449.269			25.485	0.135282	35.405		15.836	0.152064	14.36
	75.5	0.0545879	477.246		75.5	-0.0680976	482.375		75.5	0.136378	445.374			25.655	0.135282	35.405		15.942	0.152064	14.36
	76	0.0467984	475.818		76	-0.0466764	480.557		76	0.127291	440.441			25.825	0.132472	34.469		16.047	0.152578	14.784
	76.5	0.0260262	476.208		76.5	-0.00772855	496.655		76.5	0.117554	443.297			25.995	0.129014	33.315		16.153	0.149429	14.168
	77	-0.00772855	467.574		77	0.0455001	503.536		77	0.0974305	437.909			26.165	0.126093	32.719		16.259	0.149429	14.168
	77.5	-0.0486237	462.316		77.5	0.100027	506.133		77.5	0.0773075	438.234			26.334	0.123205	31.839		16.364	0.145573	13.468
	78	-0.0771855	460.304		78	0.14287	506.392		78	0.0604301	441.025			26.504	0.119322	31.093		16.47	0.14534	13.698
	78.5	-0.0960102	453.683		78.5	0.163642	502.757		78.5	0.0422545	439.337			26.674	0.116535	29.512		16.575	0.143247	13.293
	79	-0.113537	457.448		79	0.170782	500.485		79	0.0162893	432.132			26.844	0.113345	28.637		16.681	0.140099	12.212
	79.5	-0.123274	454.073		79.5	0.163642	487.697		79.5	-0.0122725	428.302			27.014	0.108824	27.581		16.787	0.138432	11.623
	80	-0.116782	449.139		80	0.154554	488.606		80	-0.0265533	431.158			27.184	0.104784	26.63		16.892	0.13354	11.187
	80.5	-0.0960102	455.89		80.5	0.139624	485.75		80.5	-0.0414833	427.328			27.354	0.102568	26		16.998	0.130895	10.96
	81	-0.0784837	455.241		81	0.122097	488.152		81	-0.0564133	417.332			27.524	0.0990757	25.046		17.103	0.127213	10.626
	81.5	-0.0609572	458.422		81.5	0.101325	486.464		81.5	-0.0778346	410.711			27.694	0.0955503	24.168		17.209	0.125275	10.76
	82	-0.0336937	487.568		82	0.0766584	491.722		82	-0.105747	407.53			27.864	0.0917338	22.761		17.314	0.120344	10.221
	82.5	0.00460492	493.54		82.5	0.050044	485.88		82.5	-0.113537	403.505			28.033	0.0890702	22.1		17.42	0.117592	9.596
	83	0.0480966	497.434		83	0.0214823	488.476		83	-0.064852	400.974			28.203	0.0841122	21.928		17.526	0.114395	9.032
	83.5	0.0876936	502.238		83.5	0.000710141	486.334		83.5	-0.0395359	404.544			28.373	0.0810232	20.82		17.631	0.107574	8.193
	84	0.116904	496.526		84	-0.0129216	479.129		84	-0.0752381	402.921			28.543	0.0781916	19.699		17.737	0.107032	8.024
	84.5	0.129238	497.499		84.5	-0.0161672	480.362		84.5	-0.0810802	405.518			28.713	0.0732336	18.579		17.842	0.101558	7.763
	85	0.133782	494.124		85	-0.0161672	488.022		85	-0.034992	412.918			28.883	0.069462	17.922		17.948	0.0944465	7.058
	85.5	0.131834	495.617		85.5	-0.0142198	491.462		85.5	0.0480966	418.825			29.053	0.067246	17.166		18.053	0.0916755	6.747
	86	0.129238	490.943		86	-0.0109742	488.347		86	0.124045	432.002			29.223	0.0623551	15.69		18.159	0.0861143	6.372
	86.5	0.120799	491.462		86.5	-0.00772855	479.583		86.5	0.175326	438.299			29.393	0.0591095	15.36		18.265	0.0806016	5.975
	87	0.12015	483.868		87	6.1011e-05	479.259		87	0.201291	448.23			29.563	0.0553154	14.845		18.37	0.0746819	5.667
	87.5	0.123396	479.908		87.5	0.00979796	474.39		87.5	0.205186	451.801			29.732	0.0480631	13.705		18.476	0.0667567	5.412
	88	0.121448	482.634		88	0.0253771	471.08		88	0.20194	443.816			29.902	0.045377	13.209		18.581	0.0662238	5.29
	88.5	0.116904	479.194		88.5	0.0474475	469.781		88.5	0.199344	444.725			30.072	0.0401616	12.402		18.687	0.0599651	5.145
	89	0.107167	480.882		89	0.0708162	474.39		89	0.194151	442.518			30.242	0.0357072	11.764		18.792	0.0535513	4.685
	89.5	0.100676	478.025		89.5	0.0863953	474.455		89.5	0.178572	446.413			30.412	0.0284884	11.239		18.898	0.0468081	4.04
	90	0.0902901	474.975		90	0.0922375	478.22		90	0.16494	453.034			30.582	0.02024	10.469		19.004	0.0366351	3.448
	90.5	0.079904	463.874		90.5	0.0915883	480.297		90.5	0.150659	456.344			30.752	0.0163452	9.961		19.109	0.029204	2.987
	91	0.0662723	461.343		91	0.0876936	483.024		91	0.138975	457.123			30.922	0.00900334	9.021		19.215	0.024292	2.703
	91.5	0.0519914	454.787		91.5	0.0786057	479.389		91.5	0.129238	456.864			31.092	0.00122497	8.243		19.32	0.0200193	3.062
	92	0.0455001	460.564		92	0.0695179	487.308		92	0.113659	453.099			31.262	-0.006005	7.372		19.426	0.0140609	2.98
	92.5	0.0344649	461.602		92.5	0.0643249	484.257		92.5	0.0993779	454.267			31.431	-0.0132126	6.705		19.531	0.00372327	2.393
	93	0.00720144	453.943		93	0.0584827	485.361		93	0.0883427	453.683			31.601	-0.0204537	5.321		19.637	-0.00407598	2.067
	93.5	-0.0375885	453.488		93.5	0.0526405	485.036		93.5	0.0863953	453.164			31.771	-0.0289708	4.804		19.743	-0.0120981	1.293
	94	-0.0823785	457.967		94	0.0506932	491.008		94	0.0837988	446.023			31.941	-0.0377005	4.628		19.848	-0.0152178	1.838
	94.5	-0.123274	496.201		94.5	0.0506932	495.422		94.5	0.0831497	443.037			32.111	-0.0475157	4.36		19.954	-0.0192869	1.397
	95	-0.151186	499.317		95	0.0506932	499.187		95	0.0786057	448.425			32.281	-0.0550479	3.231		20.059	-0.0286751	1.023
	95.5	-0.147292	498.538		95.5	0.0422545	508.535		95.5	0.0675705	444.725			32.451	-0.0654564	2.439		20.165	-0.0418612	0.702
	96	-0.094712	507.756		96	0.024728	507.95		96	0.050044	446.608			32.621	-0.0744546	1.573		20.27	-0.0480715	0.83
	96.5	-0.0168164	514.896		96.5	0.0084997	512.559		96.5	0.0331666	451.476			32.791	-0.0766259	1.62		20.376	-0.0480715	0.83
	97	-0.0103251	523.075		97	-0.0044829	499.836		97	0.0156401	448.101			32.961	-0.0945217	1.244		20.482	-0.0480715	0.83
	97.5	-0.00643029	529.112		97.5	-0.0142198	498.213		97.5	-0.000588119	446.348			33.13	-0.102334	1.218		20.587	-0.0590583	0.509
	98	0.0312193	515.87		98	-0.0155181	488.801		98	-0.0233077	438.493			33.3	-0.102334	1.218		20.693	-0.0780768	0
	98.5	0.089641	517.557		98.5	-0.00643029	484.387		98.5	-0.0427816	438.364			33.47	-0.121382	0		20.798	-0.0780768	0
	99	0.144817	517.687		99	0.00720144	470.625		99	-0.0583607	427.458			33.64	-0.131511	0.752		20.904	-0.0780768	0
	99.5	0.190905	514.182		99.5	0.0227806	478.285		99.5	-0.0726416	429.081			33.81	-0.131511	0.752		21.01	-0.0780768	0
	100	0.212327	508.664		100	0.059781	471.015		100	-0.0960102	421.941
	100.5	0.212976	501.07		100.5	0.107167	463.809		100.5	-0.127168	414.93
	101	0.198046	490.619		101	0.0857462	459.006		101	-0.115484	419.863
	101.5	0.173379	486.075		101.5	0.0422545	452.904		101.5	-0.131712	427.523
	102	0.155203	488.217		102	0.0273245	444.725		102	-0.164169	436.221
	102.5	0.143519	483.738		102.5	0.0266753	453.229		102.5	-0.153134	434.858
	103	0.13508	483.218		103	0.0208332	458.552		103	-0.0908172	434.534
	103.5	0.127291	489.45		103.5	-0.00318464	449.334		103.5	-0.0044829	436.741
	104	0.12015	488.736		104	-0.0285007	476.403		104	0.0740618	430.899
	104.5	0.107817	485.88		104.5	-0.0343429	476.987		104.5	0.132484	434.599
	105	0.0980796	485.101		105	-0.0323955	485.815		105	0.168186	435.572
	105.5	0.0922375	485.49		105.5	-0.0220094	495.941		105.5	0.181817	445.634
	106	0.0889918	475.753		106	-0.00513203	489.515		106	0.185063	454.008
	106.5	0.0876936	479.259		106.5	0.0455001	491.787		106.5	0.183765	472.248
	107	0.0837988	479.453		107	0.0773075	491.982		107	0.178572	479.129
	107.5	0.0708162	477.961		107.5	0.0558862	493.15		107.5	0.181817	476.013
	108	0.0442019	481.985		108	0.0558862	488.931		108	0.175975	474.001
	108.5	0.0195349	469.717		108.5	0.0954831	481.725		108.5	0.168835	466.081
	109	0.0084997	467.055		109	0.143519	475.624		109	0.160396	462.641
	109.5	0.000710141	459.655		109.5	0.168835	473.806		109.5	0.149361	465.238
	110	-0.00772855	459.46		110	0.174028	468.938		110	0.137677	462.706
	110.5	-0.0310972	452.839		110.5	0.161694	469.717		110.5	0.12794	453.553
	111	-0.059659	450.437		111	0.14222	471.599		111	0.118203	452.385
	111.5	-0.105098	458.292		111.5	0.124045	475.689		111.5	0.105869	450.632
	112	-0.149239	457.188		112	0.107817	485.036		112	0.0928866	452.58
	112.5	-0.16352	467.899		112.5	0.0922375	486.594		112.5	0.0760092	442.843
	113	-0.124572	472.053		113	0.0740618	481.531		113	0.0643249	443.232
	113.5	-0.0401851	466.601		113.5	0.0493949	477.766		113.5	0.0630266	442.972
	114	0.0286227	470.366		114	0.0266753	472.053		114	0.0578336	441.869
	114.5	0.0221314	488.152		114.5	0.00460492	467.12		114.5	0.0429036	441.739
	115	0.0260262	496.526		115	-0.0135707	468.743		115	0.0188858	438.493
	115.5	0.0740618	492.176		115.5	-0.020062	468.353		115.5	-0.0142198	436.092
	116	0.129238	507.496		116	-0.00643029	469.262		116	-0.0414833	441.739
	116.5	0.170133	514.507		116.5	0.0104471	457.123		116.5	-0.0564133	431.872
	117	0.18701	514.636		117	0.0260262	452.709		117	-0.0629046	434.014
	117.5	0.185712	519.764		117.5	0.0364123	452.125		117.5	-0.0719924	426.809
	118	0.175326	515.026		118	0.0325175	450.892		118	-0.079782	418.76
	118.5	0.163642	509.508		118.5	0.0331666	451.022		118.5	-0.0817294	424.407
	119	0.153256	508.47		119	0.0390088	447.062		119	-0.079782	422.395
	119.5	0.137677	500.42		119.5	0.0455001	453.683		119.5	-0.0609572	422.07
	120	0.123396	502.498		120	0.0552371	447.386		120	-0.0259042	418.695
	120.5	0.111711	496.396		120.5	0.0701671	444.011		120.5	0.0409562	417.007
	121	0.100676	490.164		121	0.0870444	453.878		121	0.0935357	420.383
	121.5	0.089641	490.034		121.5	0.0980796	446.802		121.5	0.0571845	423.563
	122	0.0837988	487.308		122	0.102624	440.895		122	0.0221314	444.725
	122.5	0.0805531	478.934		122.5	0.0922375	447.257		122.5	0.0377106	469.327
	123	0.0760092	492.436		123	0.0695179	454.592		123	0.079904	502.368
	123.5	0.064974	487.697		123.5	0.0344649	453.813		123.5	0.118203	496.72
	124	0.0539388	484.711		124	-0.0155181	456.864		124	0.149361	494.838
	124.5	0.0435527	486.854		124.5	-0.059659	450.762		124.5	0.168835	500.485
	125	0.0318684	484.711		125	-0.101203	445.309		125	0.177923	512.754
	125.5	0.0214823	483.348		125.5	-0.125221	444.271		125.5	0.175975	515.091
	126	0.00720144	474.78		126	-0.129116	445.115		126	0.167537	513.403
	126.5	-0.0220094	471.859		126.5	-0.116782	448.555		126.5	0.155852	505.808
	127	-0.0518694	472.248		127	-0.0888698	475.883		127	0.151308	504.575
	127.5	-0.0758872	479.453		127.5	-0.049922	484.322		127.5	0.145466	496.071
	128	-0.0966594	496.85		128	0.0195349	488.022		128	0.132484	491.268
	128.5	-0.114186	496.915		128.5	0.0695179	484.971		128.5	0.118203	491.527
	129	-0.116133	489.126		129	0.0461492	482.569		129	0.103273	485.685
	129.5	-0.0791329	482.375		129.5	0.0312193	472.897		129.5	0.0941849	478.61
	130	0.00914883	507.756		130	0.0610792	475.104		130	0.0792549	474.001
	130.5	0.0344649	513.792		130.5	0.10522	468.743		130.5	0.0656231	467.315
	131	0.0208332	533.201		131	0.137027	466.925		131	0.0519914	461.732
	131.5	0.0442019	538.784		131.5	0.145466	475.818		131.5	0.0273245	460.629
	132	0.0987288	547.547		132	0.141571	482.699		132	-0.00188638	458.681
	132.5	0.145466	552.351		132.5	0.125343	477.961		132.5	-0.0336937	453.488
	133	0.176624	543.977		133	0.0974305	470.171		133	-0.0661503	452.969
	133.5	0.186361	543.588		133.5	0.0591318	469.846		133.5	-0.0979576	456.085
	134	0.18701	532.552		134	0.00785057	457.902		134	-0.125221	451.671
	134.5	0.178572	522.231		134.5	-0.0356411	460.823		134.5	-0.150537	449.074
	135	0.170782	517.882		135	-0.0616063	453.229		135	-0.151835	447.841
	135.5	0.159098	529.826		135.5	-0.0752381	453.813		135.5	-0.131063	458.032
	136	0.148063	530.865		136	-0.0687468	451.736		136	-0.0758872	458.941
	136.5	0.139624	521.647		136.5	-0.0557642	450.308		136.5	-0.0706942	462.576
	137	0.130536	522.88		137	-0.0343429	459.071		137	-0.0966594	460.304
	137.5	0.120799	516.584		137.5	0.00655231	478.934		137.5	-0.0752381	472.962
	138	0.103922	510.936		138	0.0753601	480.427		138	-0.00513203	474.845
	138.5	0.089641	498.084		138.5	0.0714653	478.999		138.5	0.0760092	472.832
	139	0.0766584	491.657		139	0.059781	479.843		139	0.132484	472.897
	139.5	0.0714653	483.024		139.5	0.089641	484.971		139.5	0.159747	476.727
	140	0.059781	483.608		140	0.137027	481.271		140	0.17208	469.457
	140.5	0.0532897	478.545		140.5	0.17273	472.118		140.5	0.175975	479.648
	141	0.0429036	475.494		141	0.185712	471.015		141	0.182467	481.401
	141.5	0.0130436	470.885		141.5	0.183765	467.055		141.5	0.181817	486.075
	142	-0.0336937	464.004		142	0.169484	472.183		142	0.177923	481.596
	142.5	-0.0836768	469.132		142.5	0.151957	476.597		142.5	0.168186	472.508
	143	-0.127168	465.238		143	0.132484	460.823		143	0.162344	477.961
	143.5	-0.160274	461.408		143.5	0.111711	463.745		143.5	0.151308	480.232
	144	-0.184941	453.943		144	0.0857462	460.174		144	0.138326	469.717
	144.5	-0.207011	472.248		144.5	0.059781	468.418		144.5	0.130536	477.571
	145	-0.187538	486.399		145	0.0383597	462.966		145	0.12015	474.26
	145.5	-0.107695	506.003		145.5	0.0182367	456.734		145.5	0.106518	473.546
	146	-0.0680976	505.159		146	0.0020084	449.529		146	0.0961323	464.264
	146.5	-0.0291498	501.134		146.5	-0.0129216	453.358		146.5	0.0902901	462.641
	147	0.0344649	506.003		147	-0.0220094	449.983		147	0.0857462	459.33
	147.5	0.111711	504.185		147.5	-0.0375885	451.281		147.5	0.0773075	451.541
	148	0.17273	500.94		148	-0.0525185	445.05		148	0.0636758	449.788
	148.5	0.20259	498.213		148.5	-0.0570624	445.569		148.5	0.0467984	443.557
	149	0.207783	498.733		149	-0.0505711	456.734		149	0.0266753	446.348
	149.5	0.203239	496.201		149.5	-0.0310972	468.029		149.5	-0.00643029	442.258
	150	0.195449	491.982		150	-0.00253551	475.104		150	-0.0388868	430.444
	150.5	0.182467	493.28		150.5	0.0364123	471.339		150.5	-0.0570624	436.221
	151	0.16494	487.568		151	0.079904	469.976		151	-0.0564133	426.29
	151.5	0.148712	490.619		151.5	0.116904	472.508		151.5	-0.0622555	433.885
	152	0.13508	481.141		152	0.136378	471.729		152	-0.0726416	429.73
	152.5	0.122097	478.48		152.5	0.140922	473.936		152.5	-0.0856242	423.369
	153	0.114308	472.053		153	0.14222	469.717		153	-0.059659	437.455
	153.5	0.103273	469.522		153.5	0.13508	476.273		153.5	-0.0505711	436.286
	154	0.089641	469.132		154	0.121448	476.013		154	-0.0765363	435.248
	154.5	0.079904	468.353		154.5	0.10522	477.896		154.5	-0.0745889	437.52
	155	0.0695179	466.276		155	0.0954831	473.871		155	-0.0388868	448.425
	155.5	0.0623775	468.873		155.5	0.0883427	470.431		155.5	0.0130436	456.929
	156	0.059781	462.122		156	0.0792549	467.51		156	0.0636758	455.046
	156.5	0.0584827	457.059		156.5	0.0604301	467.25		156.5	0.100027	459.655
	157	0.0526405	463.095		157	0.0377106	472.118		157	0.127291	474.39
	157.5	0.0455001	449.723		157.5	0.0130436	472.183		157.5	0.146115	468.418
	158	0.0286227	445.569		158	-0.0103251	469.067		158	0.152607	459.395
	158.5	-0.0044829	444.141		158.5	-0.0291498	470.301		158.5	0.155852	456.604
	159	-0.0518694	435.702		159	-0.0369394	475.624		159	0.159098	469.327
	159.5	-0.105747	437.39		159.5	-0.0395359	483.868		159.5	0.167537	469.976
	160	-0.140151	449.594		160	-0.0388868	493.669		160	0.165589	465.173
	160.5	-0.157028	454.981		160.5	-0.0291498	497.434		160.5	0.1578	455.695
	161	-0.162871	447.581		161	-0.00902681	515.156		161	0.146115	452.255
	161.5	-0.168713	451.346		161.5	0.020184	523.075		161.5	0.13508	446.153
	162	-0.136256	448.295		162	0.0565353	517.622		162	0.124694	442.972
	162.5	-0.0752381	458.097		162.5	0.0902901	518.921		162.5	0.119501	452.06
	163	-0.064852	463.031		163	0.112361	513.598		163	0.111711	463.745
	163.5	-0.0440798	462.252		163.5	0.124045	508.47		163.5	0.0980796	471.534
	164	0.0188858	476.273		164	0.130536	512.429		164	0.0818514	474.65
	164.5	0.0993779	506.133		164.5	0.132484	515.285		164.5	0.0630266	472.118
	165	0.163642	526.451		165	0.129238	506.652		165	0.0487458	468.159
	165.5	0.208432	553.065		165.5	0.114957	500.355		165.5	0.0344649	468.418
	166	0.231151	556.635		166	0.0954831	496.655		166	0.0240788	467.445
	166.5	0.235046	554.168		166.5	0.0760092	493.734		166.5	0.0234297	462.771
	167	0.2318	545.665		167	0.0636758	489.126		167	0.0273245	452.125
	167.5	0.221414	537.291		167.5	0.0493949	488.996		167.5	0.0286227	448.555
	168	0.207133	532.682		168	0.0273245	480.882		168	0.0221314	444.336
	168.5	0.188958	524.373		168.5	-0.00772855	476.792		168.5	0.00265753	439.727
	169	0.17273	519.31		169	-0.034992	475.559		169	-0.0155181	446.478
	169.5	0.162344	504.25		169.5	-0.0603081	472.443		169.5	0.00265753	441.285
	170	0.159098	498.992		170	-0.0784837	479.129		170	-0.0343429	451.022
	170.5	0.151957	499.836		170.5	-0.079782	473.222		170.5	-0.099905	501.134
	171	0.138975	498.019		171	-0.0726416	466.86		171	-0.114835	508.145
	171.5	0.124045	496.98		171.5	-0.0655011	469.132		171.5	-0.0752381	514.182
	172	0.113659	496.201		172	-0.0570624	472.183		172	-0.0187638	509.184
	172.5	0.102624	487.957		172.5	-0.0434307	466.341		172.5	0.0331666	517.233
	173	0.0863953	483.348		173	-0.0207112	466.86		173	0.0701671	510.352
	173.5	0.0701671	489.71		173.5	0.0130436	456.864		173.5	0.101974	505.743
	174	0.0558862	489.84		174	0.0455001	460.694		174	0.122097	505.224
	174.5	0.0422545	484.517		174.5	0.064974	455.76		174.5	0.133782	498.733
	175	0.014991	480.492		175	0.0805531	458.162		175	0.138326	493.085
	175.5	-0.0122725	472.053		175.5	0.0935357	460.499		175.5	0.140922	486.399
	176	-0.0356411	473.417		176	0.10522	462.511		176	0.144168	484.452
	176.5	-0.0642029	467.834		176.5	0.107167	473.222		176.5	0.140922	480.427
	177	-0.0921155	460.434		177	0.0915883	471.859		177	0.135729	490.359
	177.5	-0.120028	465.497		177.5	0.074711	466.86		177.5	0.125992	486.269
	178	-0.136256	459.006		178	0.0539388	456.864		178	0.114957	486.918
	178.5	-0.135607	449.204		178.5	0.0312193	453.878		178.5	0.0987288	486.724
	179	-0.131063	445.958		179	0.00525405	451.346		179	0.0889918	481.336
	179.5	-0.127818	454.073		179.5	-0.0220094	445.958		179.5	0.0837988	476.467
	180	-0.120028	461.148		180	-0.0375885	442.258		180	0.0682197	466.731
	180.5	-0.114835	461.538		180.5	-0.0427816	445.05		180.5	0.0513423	460.564
	181	-0.0973085	465.302		181	-0.0408342	446.608		181	0.0338158	463.42
	181.5	-0.0382377	464.264		181.5	-0.0460272	443.946		181.5	0.014991	457.643
	182	-0.0259042	465.952		182	-0.0505711	434.014		182	-0.00707942	460.823
	182.5	-0.0109742	467.639		182.5	-0.044729	440.246		182.5	-0.0239568	461.343
	183	0.0455001	465.432		183	-0.0213603	448.101		183	-0.0382377	454.527
	183.5	0.124045	465.108		183.5	0.0487458	466.276		183.5	-0.0473255	459.59
	184	0.176624	468.224		184	0.0539388	469.717		184	-0.0538168	450.048
	184.5	0.197397	488.606		184.5	0.0325175	479.129		184.5	-0.070045	454.981
	185	0.197397	484.906		185	0.0526405	480.947		185	-0.0745889	448.685
	185.5	0.185712	483.932		185.5	0.103273	478.025		185.5	-0.0726416	442.583
	186	0.171431	483.803		186	0.144817	482.05		186	-0.0486237	436.157
	186.5	0.161694	477.896		186.5	0.165589	477.376		186.5	0.000710141	436.416
	187	0.149361	472.183		187	0.17208	477.961		187	-0.00837768	435.378
	187.5	0.140922	473.741		187.5	0.168835	482.699		187.5	-0.0226585	437.779
	188	0.134431	464.329		188	0.159747	488.476		188	0.00785057	430.055
	188.5	0.125992	457.902		188.5	0.144817	487.827		188.5	0.0675705	433.625
	189	0.116255	461.927		189	0.121448	478.09		189	0.118852	432.846
	189.5	0.106518	461.797		189.5	0.0863953	483.738		189.5	0.151308	436.871
	190	0.0974305	461.148		190	0.0480966	472.183		190	0.166238	440.051
	190.5	0.0857462	457.123		190.5	0.00720144	469.911		190.5	0.17208	456.799
	191	0.0656231	456.344		191	-0.0375885	467.12		191	0.173379	487.697
	191.5	0.0519914	455.825		191.5	-0.0791329	463.485		191.5	0.17273	479.778
	192	0.0403071	446.608		192	-0.105747	464.848		192	0.171431	476.922
	192.5	0.0240788	451.022		192.5	-0.105747	464.199		192.5	0.162993	479.713
	193	0.0117454	447.516		193	-0.0921155	460.823		193	0.154554	476.403
	193.5	0.00590318	440.765		193.5	-0.0674485	465.757		193.5	0.141571	476.467
	194	-0.00772855	443.362		194	-0.0395359	461.992		194	0.133782	469.976
	194.5	-0.0168164	443.232		194.5	-0.00902681	457.059		194.5	0.122747	467.315
	195	-0.0246059	442.648		195	0.035114	468.094		195	0.108466	462.836
	195.5	-0.0466764	444.271		195.5	0.074711	464.653		195.5	0.0954831	462.771
	196	-0.0810802	441.674		196	0.0545879	476.338		196	0.0805531	464.523
	196.5	-0.13366	432.262		196.5	0.0474475	475.039		196.5	0.0591318	460.694
	197	-0.17845	428.951		197	0.0740618	469.457		197	0.0416053	463.095
	197.5	-0.20052	438.948		197.5	0.108466	482.829		197.5	0.0292719	455.436
	198	-0.184292	464.848		198	0.125992	479.064		198	0.0214823	452.839
	198.5	-0.122625	476.403		198.5	0.131185	473.417		198.5	0.0117454	449.723
	199	-0.0310972	479.713		199	0.129887	480.622		199	-0.0044829	446.088
	199.5	0.0740618	480.362		199.5	0.132484	471.859		199.5	-0.0285007	445.699
